# Supplementary material for: Alterations of the Intracellular Peptidome in Response to the Proteasome Inhibitor Bortezomib
Source: PLoS One. 2013 Jan 7;8(1):e53263. doi: 10.1371/journal.pone.0053263 (PMC3538785; doi:10.1371/journal.pone.0053263)
Supplement: Table S1 — Summary of peptidomic results from all experiments involving bortezomib, epoxomicin, or rapamycin treatment of HEK293T or SH-SY5Y cells. Abbreviations: z, charge; T, number of TMAB tags; Theor. mass, theoretical monoisotopic mass; Adj Up, adjacent upstream amino acid residue in precursor; Adj Dwn, adjacent downstream amino acid residue in precursor; *, terminus of protein; Mox, oxidized Met; Ac, acetyl. Sequences in parenthesis were only tentatively identified; MS/MS was not sufficient for conclusive identification (XLSX) [file pone.0053263.s004.xlsx]

## Sheet: Sheet1
Table S1. Summary of peptidomic results from all experiments involving bortezomib, epoxomicin, or rapamycin treatment of HEK293T or SH-SY5Y cells
Abbreviations: z, charge; T, number of TMAB tags; Theor. mass, theoretical monoisotopic mass (unless indicated as average mass);
	Adj Up, adjacent upstream amino acid residue in precursor; Adj Dwn, adjacent downstream amino acid residue in precursor; *, terminus of protein
	Mox, oxidized Met; Ac, acetyl
	Sequences in parenthesis were only tentatively identified; MS/MS was not sufficient for conclusive identification
				Obs.	Theor.		Subcellular	Adj		Adj
Cells	Experiment	z	T	Mass	Mass	Precursor	Location	Up	Peptide sequence	Dwn	Comments	Data analysis							Average treated/control
HEK293T	bortezomib 30min, 500nM	2	1	1082.68	1082.67	Protein DJ-1 ( Parkinson disease protein 7)	nucleus	*m	Ac-ASKRALVILA	k		Bortez/Cont=	0.232558	0.186047		Cont/Cont=	0.976744	1.02326	0.209302	=Avg Bort/Cont (10min+wash, 500 nM)
HEK293T	bortezomib 30min, 500nM	2	2	1906.01	1905.98	Eukaryotic translation elongation factor 1 beta	cytoplasm	*m	GFGDLKSPAGLQVLNDYL	a		Bortez/Cont=	0.551724	0.344828		Cont/Cont=	1.24138	0.758621	0.448276	=Avg Bort/Cont (10min+wash, 500 nM)
HEK293T	bortezomib 30min, 500nM	2	1	2216.16	2216.08	Splicing factor, arginine/serine-rich 2	nucleus	*m	Ac-SYGRPPPDVEGMTSLKVDNL	t		Bortez/Cont=	0.451613	0.451613		Cont/Cont=	0.967742	1.03226	0.451613	=Avg Bort/Cont (10min+wash, 500 nM)
HEK293T	bortezomib 30min, 500nM	2	2	1685.95	1685.92	Prefoldin subunit 1	cytoplasm	*m	Ac-AAPVDLELKKAFTEL	q		Bortez/Cont=	0.5	0.416667		Cont/Cont=	0.916667	1.08333	0.458333	=Avg Bort/Cont (10min+wash, 500 nM)
HEK293T	bortezomib 30min, 500nM	2	1	1011.61	1011.63	Protein DJ-1 ( Parkinson disease protein 7)	nucleus	*m	Ac-ASKRALVIL	a		Bortez/Cont=	0.491803	0.459016		Cont/Cont=	0.918033	1.08197	0.47541	=Avg Bort/Cont (10min+wash, 500 nM)
HEK293T	bortezomib 30min, 500nM	2	2	1905.98	1905.98	Eukaryotic translation elongation factor 1 beta	cytoplasm	*m	GFGDLKSPAGLQVLNDYL	a		Bortez/Cont=	0.53125	0.53125		Cont/Cont=	1.21875	0.78125	0.53125	=Avg Bort/Cont (10min+wash, 500 nM)
HEK293T	bortezomib 30min, 500nM	2	2	1400.76	1400.77	Eukaryotic translation elongation factor 1 beta	cytoplasm	*m	GFGDLKSPAGLQVL	n		Bortez/Cont=	0.805687	0.379147		Cont/Cont=	1.06161	0.938389	0.592417	=Avg Bort/Cont (10min+wash, 500 nM)
HEK293T	bortezomib 30min, 500nM	4	2	3198.7	3198.6	Phosphatidylethanolamine-binding protein 1	cytoplasm	*m	PVDLSKWSGPLSLQEVDEQPQHPLHVTY	a		Bortez/Cont=	0.7	0.5		Cont/Cont=	1.7	0.3	0.6	=Avg Bort/Cont (10min+wash, 500 nM)
HEK293T	bortezomib 30min, 500nM	2	2	1478.8	1478.81	Prohibitin	mitochondria	*m	Ac-AAKVFESIGKFGLA	l		Bortez/Cont=	0.615385	0.692308		Cont/Cont=	0.871795	1.12821	0.653846	=Avg Bort/Cont (10min+wash, 500 nM)
HEK293T	bortezomib 30min, 500nM	2	2	1662.99	1662.93	Prohibitin	mitochondria	*m	Ac-AAKVFESIGKFGLALA	v		Bortez/Cont=	0.609756	0.731707		Cont/Cont=	0.768293	1.23171	0.670732	=Avg Bort/Cont (10min+wash, 500 nM)
HEK293T	bortezomib 30min, 500nM	3	1	1806	1805.99	Heat shock 10kDa protein 1 (chaperonin 10)	mitochondria	*m	Ac-AGQAFRKFLPLFDRV	l		Bortez/Cont=	0.60274	0.739726		Cont/Cont=	1.0411	0.958904	0.671233	=Avg Bort/Cont (10min+wash, 500 nM)
HEK293T	bortezomib 30min, 500nM	1	1	1050.54	1050.54	Peptidylprolyl isomerase A	cytoplasm	*m	VNPTVFFDI	a		Bortez/Cont=	0.75	0.638889		Cont/Cont=	1.05556	0.944444	0.694444	=Avg Bort/Cont (10min+wash, 500 nM)
HEK293T	bortezomib 30min, 500nM	2	2	1397.75	1397.76	Phosphatidylethanolamine-binding protein 1	cytoplasm	*m	PVDLSKWSGPLSL	q		Bortez/Cont=	0.903226	0.548387		Cont/Cont=	1.25806	0.741935	0.725806	=Avg Bort/Cont (10min+wash, 500 nM)
HEK293T	bortezomib 30min, 500nM	2	1	2357.22	2357.18	40S ribosomal protein S12	cytoplasm	*m	Ac-AEEGIAAGGVMDVNTALQEVLKT	a		Bortez/Cont=	0.535714	1.17857		Cont/Cont=	1.10714	0.892857	0.857143	=Avg Bort/Cont (10min+wash, 500 nM)
HEK293T	bortezomib 30min, 500nM	1	1	1524.82	1524.75	RNA binding motif protein 3	nucleus	*m	Ac-SSEEGKLFVGGLNF	n		Bortez/Cont=	0.93617	0.851064		Cont/Cont=	0.93617	1.06383	0.893617	=Avg Bort/Cont (10min+wash, 500 nM)
HEK293T	bortezomib 30min, 500nM	3	3	1611.76	1611.78	Cytochrome c oxidase subunit 6b	mitochondria	*m	Ac-AEDMETKIKNYKT	a		Bortez/Cont=	1.17647	0.823529		Cont/Cont=	1.05882	0.941176	1	=Avg Bort/Cont (10min+wash, 500 nM)
HEK293T	bortezomib 30min, 500nM	2	1	2480.26	2480.19	Splicing factor, arginine/serine-rich 2	nucleus	*m	Ac-SYGRPPPDVEGMTSLKVDNLTY	r		Bortez/Cont=	1.15	1.05		Cont/Cont=	1.25	0.75	1.1	=Avg Bort/Cont (10min+wash, 500 nM)
HEK293T	bortezomib 30min, 500nM	2	1	1922.96	1922.92	40S Ribosomal protein S21	cytoplasm	*	Ac-MQNDAGEFVDLYVPRK	c		Bortez/Cont=	1.5	0.75		Cont/Cont=	1	1	1.125	=Avg Bort/Cont (10min+wash, 500 nM)
HEK293T	bortezomib 30min, 500nM	3	1	1555.89	1555.85	40S Ribosomal protein S28	cytoplasm	*	Ac-MDTSRVQPIKLAR	v		Bortez/Cont=	1.5	2		Cont/Cont=	1.16667	0.833333	1.75	=Avg Bort/Cont (10min+wash, 500 nM)
HEK293T	bortezomib 30min, 500nM	4	3	2837.61	2837.58	Histidine triad nucleotide-binding protein 1	cytoplasm	*m	Ac-ADEIAKAQVARPGGDTIFGKIIRKEI	p		Bortez/Cont=	1.85714	1.92857		Cont/Cont=	0.785714	1.21429	1.89286	=Avg Bort/Cont (10min+wash, 500 nM)
HEK293T	bortezomib 30min, 500nM	4	2	2309.37	2309.34	40S Ribosomal protein S28	cytoplasm	*	Ac-MDTSRVQPIKLARVTKVLGR	t		Bortez/Cont=	2.46154	2.30769		Cont/Cont=	0.923077	1.07692	2.38462	=Avg Bort/Cont (10min+wash, 500 nM)
HEK293T	bortezomib 30min, 500nM	3	1	1706.92	1706.93	Heat shock 10kDa protein 1 (chaperonin 10)	mitochondria	*m	Ac-AGQAFRKFLPLFDR	v		Bortez/Cont=	2.61538	2.30769		Cont/Cont=	1.23077	0.769231	2.46154	=Avg Bort/Cont (10min+wash, 500 nM)
HEK293T	bortezomib 30min, 500nM	3	2	2309.33	2309.34	40S Ribosomal protein S28	cytoplasm	*	Ac-MDTSRVQPIKLARVTKVLGR	t		Bortez/Cont=	2.92308	2.92308		Cont/Cont=	0.923077	1.07692	2.92308	=Avg Bort/Cont (10min+wash, 500 nM)
HEK293T	bortezomib 30min, 500nM	2	1	1328.69	1328.71	40S Ribosomal protein S28	cytoplasm	*	Ac-MDTSRVQPIKL	a		Bortez/Cont=	4	3.33333		Cont/Cont=	1.33333	0.666667	3.66667	=Avg Bort/Cont (10min+wash, 500 nM)
HEK293T	bortezomib 30min, 500nM	4	3	2595.44	2595.45	Histidine triad nucleotide-binding protein 1	cytoplasm	*m	ADEIAKAQVARPGGDTIFGKIIRK	e		Bortez/Cont=	3.75	3.75		Cont/Cont=	1	1	3.75	=Avg Bort/Cont (10min+wash, 500 nM)
HEK293T	bortezomib 30min, 500nM	3	2	2711.54	2711.46	Protein DJ-1 ( Parkinson disease protein 7)	nucleus	*m	Ac-ASKRALVILAKGAEEMETVIPVDVM	r		Bortez/Cont=	<0.2	<0.2		Cont/Cont=	1.02439	0.97561	<0.2	=Avg Bort/Cont (10min+wash, 500 nM)
HEK293T	bortezomib 30min, 500nM	2	1	2824.41	2824.28	RNA binding motif protein 3	nucleus	*m	Ac-SSEEGKLFVGGLNFNTDEQALEDHF	s		Bortez/Cont=	<0.2	<0.2		Cont/Cont=	1.09091	0.909091	<0.2	=Avg Bort/Cont (10min+wash, 500 nM)
HEK293T	bortezomib 30min, 500nM	2	1	1399.74	1399.75	40S Ribosomal protein S28	cytoplasm	*	Ac-MDTSRVQPIKLA	r		Bortez/Cont=	>5	>5		Cont/Cont=	nd	nd	>5	=Avg Bort/Cont (10min+wash, 500 nM)
HEK293T	bortezomib 30min, 500nM	3	1	2137.16	2137.16	Enhancer of rudimentary homolog	nucleus	*m	Ac-SHTILLVQPTKRPEGRTY	a		Bortez/Cont=	2.87	3.04		Cont/Cont=	1.22	0.78	2.96	=Avg Bort/Cont (10min+wash, 500 nM)
HEK293T	bortezomib 30min, 500nM	4	1	2137.18	2137.16	Enhancer of rudimentary homolog	nucleus	*m	Ac-SHTILLVQPTKRPEGRTY	a		Bortez/Cont=	3.24	3.43		Cont/Cont=	1.33	0.67	3.33	=Avg Bort/Cont (10min+wash, 500 nM)
HEK293T	bortezomib 30min, 500nM	2	1	2137.19	2137.16	Enhancer of rudimentary homolog	nucleus	*m	Ac-SHTILLVQPTKRPEGRTY	a		Bortez/Cont=	3.5	4		Cont/Cont=	1.25	0.75	3.75	=Avg Bort/Cont (10min+wash, 500 nM)
HEK293T	bortezomib 30min, 500nM	2	1	2010.06	2009.98	Hematological and neurological expressed 1 protein	nucleus	*m	Ac-TTTTTFKGVDPNSRNSSR	d		Bortez/Cont=	>5	>5		Cont/Cont=	nd	nd	>5	=Avg Bort/Cont (10min+wash, 500 nM)
HEK293T	bortezomib 30min, 500nM	3	1	2010.07	2009.98	Hematological and neurological expressed 1 protein	nucleus	*m	Ac-TTTTTFKGVDPNSRNSSR	d		Bortez/Cont=	>5	>5		Cont/Cont=	nd	nd	>5	=Avg Bort/Cont (10min+wash, 500 nM)
HEK293T	bortezomib 30min, 500nM	2	2	1382.63	1382.64	Cytochrome c oxidase subunit 6b	mitochondria	*m	Ac-AEDMETKIKNY	k		Bortez/Cont=	3.66	3.02		Cont/Cont=	1.06	0.94	>5	=Avg Bort/Cont (10min+wash, 500 nM)
HEK293T	bortezomib 30min, 500nM	3	1	1784.87	1784.87	Acyl-CoA-binding protein (Diazepam binding inhibitor)	cytoplasm	*m	Ac-SQAEFEKAAEEVRHL	k		Bortez/Cont=	>5	>5		Cont/Cont=	nd	nd	>5	=Avg Bort/Cont (10min+wash, 500 nM)
HEK293T	bortezomib 30min, 500nM	2	1	965.429	965.508	Heat shock 10kDa protein 1 (chaperonin 10)	mitochondria	*m	Ac-AGQAFRKF	l		Bortez/Cont=	>5	>5		Cont/Cont=	nd	nd	>5	=Avg Bort/Cont (10min+wash, 500 nM)
HEK293T	bortezomib 30min, 500nM	2	2	1287.62	1287.68	Eukaryotic translation elongation factor 1 beta	cytoplasm	*m	GFGDLKSPAGLQV	l		Bortez/Cont=	>5	>5		Cont/Cont=	nd	nd	>5	=Avg Bort/Cont (10min+wash, 500 nM)
HEK293T	bortezomib 30min, 500nM	2	1	1078.58	1078.59	Heat shock 10kDa protein 1 (chaperonin 10)	mitochondria	*m	Ac-AGQAFRKFL	p		Bortez/Cont=	4.42	4		Cont/Cont=	0.98	1.02	4.21	=Avg Bort/Cont (10min+wash, 500 nM)
HEK293T	bortezomib 30min, 500nM	2	1	1212.65	1212.65	Histidine triad nucleotide-binding protein 1	cytoplasm	*m	Ac-ADEIAKAQVAR	p		Bortez/Cont=	>5	>5		Cont/Cont=	nd	nd	>5	=Avg Bort/Cont (10min+wash, 500 nM)
HEK293T	bortezomib 30min, 500nM	3	1	1433.78	1433.84	Enhancer of rudimentary homolog	nucleus	*m	Ac-SHTILLVQPTKR	p		Bortez/Cont=	>5	>5		Cont/Cont=	nd	nd	>5	=Avg Bort/Cont (10min+wash, 500 nM)
HEK293T	bortezomib 30min, 500nM	2	1	1433.84	1433.84	Enhancer of rudimentary homolog	nucleus	*m	Ac-SHTILLVQPTKR	p		Bortez/Cont=	>5	>5		Cont/Cont=	nd	nd	>5	=Avg Bort/Cont (10min+wash, 500 nM)
HEK293T	bortezomib 30min, 500nM	2	1	1543.86	1543.82	Macrophage migration inhibitory factor	cytoplasm	*m	PMFIVNTNVPRASV	p		Bortez/Cont=	>5	>5		Cont/Cont=	nd	nd	>5	=Avg Bort/Cont (10min+wash, 500 nM)
HEK293T	bortezomib 30min, 500nM	2	1	2110.18	2110.12	Methylosome subunit pICln (AltName: Chloride channel, nucleotide sensitive 1A)	cytoplasm	*m	Ac-SFLKSFPPPGPAEGLLRQQ	p		Bortez/Cont=	>5	>5		Cont/Cont=	nd	nd	>5	=Avg Bort/Cont (10min+wash, 500 nM)
HEK293T	bortezomib 30min, 500nM	2	2	1060.52	1060.56	Eukaryotic translation elongation factor 1 beta	cytoplasm	*m	GFGDLKSPAGL	q		Bortez/Cont=	>5	>5		Cont/Cont=	nd	nd	>5	=Avg Bort/Cont (10min+wash, 500 nM)
HEK293T	bortezomib 30min, 500nM	2	1	1550.9	1550.82	Heat shock 10kDa protein 1 (chaperonin 10)	mitochondria	*m	Ac-AGQAFRKFLPLFD	r		Bortez/Cont=	2.86	2.95		Cont/Cont=	1.08	0.92	2.91	=Avg Bort/Cont (10min+wash, 500 nM)
HEK293T	bortezomib 30min, 500nM	2	1	1882.97	1882.92	Nuclear transport factor 2	cytoplasm	*m	Ac-GDKPIWEQIGSSFIQH	y		Bortez/Cont=	>5	>5		Cont/Cont=	nd	nd	>5	=Avg Bort/Cont (10min+wash, 500 nM)
HEK293T	bortezomib 30min, 500nM	2	1	1054.62	1054.6	Peroxiredoxin 5	mitochondria	c	SLAPNIISQL	*		Bortez/Cont=	0.555556	0.37037		Cont/Cont=	1.18519	0.814815	0.462963	=Avg Bort/Cont (10min+wash, 500 nM)
HEK293T	bortezomib 30min, 500nM	3	3	1148.6	1148.62	40S Ribosomal protein S21	cytoplasm	l	AKADGIVSKNF	*		Bortez/Cont=	1.07042	0.366197		Cont/Cont=	1.04225	0.957746	0.71831	=Avg Bort/Cont (10min+wash, 500 nM)
HEK293T	bortezomib 30min, 500nM	2	3	1148.62	1148.62	40S Ribosomal protein S21	cytoplasm	l	AKADGIVSKNF	*		Bortez/Cont=	1.125	0.475		Cont/Cont=	1.175	0.825	0.8	=Avg Bort/Cont (10min+wash, 500 nM)
HEK293T	bortezomib 30min, 500nM	3	3	1620.77	1620.82	Eukaryotic translation initiation factor 5A	cytoplasm	l	SAMTEEAAVAIKAMAK	*		Bortez/Cont=	1.14286	0.914286		Cont/Cont=	1.14286	0.857143	1.02857	=Avg Bort/Cont (10min+wash, 500 nM)
HEK293T	bortezomib 30min, 500nM	3	2	2180.15	2180.17	Cytochrome c oxidase subunit 5a	mitochondria	l	RPTLNELGISTPEELGLDKV	*		Bortez/Cont=	1.42857	1		Cont/Cont=	1.07143	0.928571	1.21429	=Avg Bort/Cont (10min+wash, 500 nM)
HEK293T	bortezomib 30min, 500nM	2	2	1356.72	1356.71	Cytochrome c oxidase subunit 5a	mitochondria	l	GISTPEELGLDKV	*		Bortez/Cont=	1.49425	1.21839		Cont/Cont=	0.91954	1.08046	1.35632	=Avg Bort/Cont (10min+wash, 500 nM)
HEK293T	bortezomib 30min, 500nM	2	2	1356.71	1356.71	Cytochrome c oxidase subunit 5a	mitochondria	l	GISTPEELGLDKV	*		Bortez/Cont=	1.77778	1.46667		Cont/Cont=	0.888889	1.11111	1.62222	=Avg Bort/Cont (10min+wash, 500 nM)
HEK293T	bortezomib 30min, 500nM	3	3	2234.19	2234.15	40S Ribosomal protein S21	cytoplasm	m	GESDDSILRLAKADGIVSKNF	*		Bortez/Cont=	3.36842	1.15789		Cont/Cont=	0.947368	1.05263	2.26316	=Avg Bort/Cont (10min+wash, 500 nM)
HEK293T	bortezomib 30min, 500nM	2	2	842.501	842.511	FK506 Binding Protein	cytoplasm	d	VELLKLE	*		Bortez/Cont=	3.46154	1.61538		Cont/Cont=	1.07692	0.923077	2.53846	=Avg Bort/Cont (10min+wash, 500 nM)
HEK293T	bortezomib 30min, 500nM	2	2	1203.68	1203.67	FK506 Binding Protein	cytoplasm	l	VFDVELLKLE	*		Bortez/Cont=	3.46154	1.84615		Cont/Cont=	1	1	2.65385	=Avg Bort/Cont (10min+wash, 500 nM)
HEK293T	bortezomib 30min, 500nM	3	3	1077.54	1077.58	40S Ribosomal protein S21	cytoplasm	a	KADGIVSKNF	*		Bortez/Cont=	4.18182	1.54545		Cont/Cont=	1.27273	0.727273	2.86364	=Avg Bort/Cont (10min+wash, 500 nM)
HEK293T	bortezomib 30min, 500nM	3	3	2914.55	2914.51	Triosephosphate isomerase 1	cytoplasm	l	ASQPDVDGFLVGGASLKPEFVDIINAKQ	*		Bortez/Cont=	4.52	1.44		Cont/Cont=	1.2	0.8	2.98	=Avg Bort/Cont (10min+wash, 500 nM)
HEK293T	bortezomib 30min, 500nM	2	2	949.477	949.487	40S Ribosomal protein S21	cytoplasm	k	ADGIVSKNF	*		Bortez/Cont=	4.19355	2.19355		Cont/Cont=	1.03226	0.967742	3.19355	=Avg Bort/Cont (10min+wash, 500 nM)
HEK293T	bortezomib 30min, 500nM	5	2	2678.51	2678.49	40S Ribosomal protein S28	cytoplasm	v	KGPVREGDVLTLLESEREARRLR	*		Bortez/Cont=	5.17647	3.29412		Cont/Cont=	0.941176	1.05882	4.23529	=Avg Bort/Cont (10min+wash, 500 nM)
HEK293T	bortezomib 30min, 500nM	1	1	687.363	687.38	Thioredoxin	nucleus	a	TINELV	*		Bortez/Cont=	>5	>5		Cont/Cont=	nd	nd	>5	=Avg Bort/Cont (10min+wash, 500 nM)
HEK293T	bortezomib 30min, 500nM	3	3	1923.99	1923.95	Acyl carrier protein, mitochondrial	mitochondria	c	PQEIVDYIADKKDVYE	*		Bortez/Cont=	>5	>5		Cont/Cont=	nd	nd	>5	=Avg Bort/Cont (10min+wash, 500 nM)
HEK293T	bortezomib 30min, 500nM	2	2	1128.61	1128.64	Thioredoxin	nucleus	e	KLEATINELV	*		Bortez/Cont=	>5	>5		Cont/Cont=	nd	nd	>5	=Avg Bort/Cont (10min+wash, 500 nM)
HEK293T	bortezomib 30min, 500nM	2	2	1469.82	1469.8	Cytochrome c oxidase subunit 5a	mitochondria	e	LGISTPEELGLDKV	*		Bortez/Cont=	>5	>5		Cont/Cont=	nd	nd	>5	=Avg Bort/Cont (10min+wash, 500 nM)
HEK293T	bortezomib 30min, 500nM	4	1	2012.11	2012.11	40S Ribosomal protein S28	cytoplasm	e	GDVLTLLESEREARRLR	*		Bortez/Cont=	>5	>5		Cont/Cont=	nd	nd	>5	=Avg Bort/Cont (10min+wash, 500 nM)
HEK293T	bortezomib 30min, 500nM	3	1	2012.12	2012.11	40S Ribosomal protein S28	cytoplasm	e	GDVLTLLESEREARRLR	*		Bortez/Cont=	>5	>5		Cont/Cont=	nd	nd	>5	=Avg Bort/Cont (10min+wash, 500 nM)
HEK293T	bortezomib 30min, 500nM	2	1	2012.19	2012.11	40S Ribosomal protein S28	cytoplasm	e	GDVLTLLESEREARRLR	*		Bortez/Cont=	>5	>5		Cont/Cont=	nd	nd	>5	=Avg Bort/Cont (10min+wash, 500 nM)
HEK293T	bortezomib 30min, 500nM	3	2	2293.25	2293.25	Cytochrome c oxidase subunit 5a	mitochondria	e	LRPTLNELGISTPEELGLDKV	*		Bortez/Cont=	>5	>5		Cont/Cont=	nd	nd	>5	=Avg Bort/Cont (10min+wash, 500 nM)
HEK293T	bortezomib 30min, 500nM	2	2	2293.31	2293.25	Cytochrome c oxidase subunit 5a	mitochondria	e	LRPTLNELGISTPEELGLDKV	*		Bortez/Cont=	>5	>5		Cont/Cont=	nd	nd	>5	=Avg Bort/Cont (10min+wash, 500 nM)
HEK293T	bortezomib 30min, 500nM	2	2	1249.62	1249.63	Heat shock 10kDa protein 1 (chaperonin 10)	mitochondria	f	RDGDILGKYVD	*		Bortez/Cont=	>5	>5		Cont/Cont=	nd	nd	>5	=Avg Bort/Cont (10min+wash, 500 nM)
HEK293T	bortezomib 30min, 500nM	3	2	2016.03	2016.01	Nucleophosmin	nucleus	m	TDQEAIQDLWQWRKSL	*		Bortez/Cont=	>5	>5		Cont/Cont=	nd	nd	>5	=Avg Bort/Cont (10min+wash, 500 nM)
HEK293T	bortezomib 30min, 500nM	2	1	1272.73	1272.71	Small nuclear ribonucleoprotein G-like protein	nucleus	n	SIIMLEALERV	*		Bortez/Cont=	>5	>5		Cont/Cont=	nd	nd	>5	=Avg Bort/Cont (10min+wash, 500 nM)
HEK293T	bortezomib 30min, 500nM	3	3	2249.19	2249.18	Single-stranded DNA-binding protein, mitochondrial	mitochondria	q	ATTIIADNIIFLSDQTKEKE	*		Bortez/Cont=	>5	>5		Cont/Cont=	nd	nd	>5	=Avg Bort/Cont (10min+wash, 500 nM)
HEK293T	bortezomib 30min, 500nM	2	2	1093.5	1093.53	Heat shock 10kDa protein 1 (chaperonin 10)	mitochondria	r	DGDILGKYVD	*		Bortez/Cont=	>5	>5		Cont/Cont=	nd	nd	>5	=Avg Bort/Cont (10min+wash, 500 nM)
HEK293T	bortezomib 30min, 500nM	2	1	1443.81	1443.78	Small nuclear ribonucleoprotein G-like protein	nucleus	r	GNSIIMLEALERV	*		Bortez/Cont=	>5	>5		Cont/Cont=	nd	nd	>5	=Avg Bort/Cont (10min+wash, 500 nM)
HEK293T	bortezomib 30min, 500nM	2	2	1007.49	1007.51	Eukaryotic translation elongation factor 1 beta	cytoplasm	s	MDVAAFNKI	*		Bortez/Cont=	>5	>5		Cont/Cont=	nd	nd	>5	=Avg Bort/Cont (10min+wash, 500 nM)
HEK293T	bortezomib 30min, 500nM	2	1	1728.79	1728.77	MAPK-interacting and spindle-stabilizing protein-like	cytoplasm	v	PSGPSGAPPMPGGPHSYH	*		Bortez/Cont=	>5	>5		Cont/Cont=	nd	nd	>5	=Avg Bort/Cont (10min+wash, 500 nM)
HEK293T	bortezomib 30min, 500nM	4	3	2406.21	2406.17	Heat shock 10kDa protein 1 (chaperonin 10)	mitochondria	v	LDDKDYFLFRDGDILGKYVD	*		Bortez/Cont=	>5	>5		Cont/Cont=	nd	nd	>5	=Avg Bort/Cont (10min+wash, 500 nM)
HEK293T	bortezomib 30min, 500nM	4	3	2505.29	2505.24	Heat shock 10kDa protein 1 (chaperonin 10)	mitochondria	v	VLDDKDYFLFRDGDILGKYVD	*		Bortez/Cont=	>5	>5		Cont/Cont=	nd	nd	>5	=Avg Bort/Cont (10min+wash, 500 nM)
HEK293T	bortezomib 30min, 500nM	2	1	1773.78	1773.74	Macrophage migration inhibitory factor	cytoplasm	y	YDMNAANVGWNNSTFA	*		Bortez/Cont=	>5	>5		Cont/Cont=	nd	nd	>5	=Avg Bort/Cont (10min+wash, 500 nM)
HEK293T	bortezomib 30min, 500nM	3	4	1712.99	1712.98	Triosephosphate isomerase 1	cytoplasm	t	KVIADNVKDWSKVVL	a		Bortez/Cont=	0.550725	0.202899		Cont/Cont=	1.30435	0.695652	0.376812	=Avg Bort/Cont (10min+wash, 500 nM)
HEK293T	bortezomib 30min, 500nM	2	1	1254.74	1254.73	Far upstream element-binding protein 2	nucleus	a	ARIINDLLQSL	r		Bortez/Cont=	0.484848	0.424242		Cont/Cont=	0.969697	1.0303	0.454545	=Avg Bort/Cont (10min+wash, 500 nM)
HEK293T	bortezomib 30min, 500nM	3	2	1899.97	1899.94	Peptidylprolyl isomerase A	cytoplasm	f	EDENFILKHTGPGILSM	a		Bortez/Cont=	0.652174	0.391304		Cont/Cont=	1.08696	0.913043	0.521739	=Avg Bort/Cont (10min+wash, 500 nM)
HEK293T	bortezomib 30min, 500nM	2	1	1634.87	1634.83	Peptidylprolyl isomerase A	cytoplasm	i	AVDGEPLGRVSFELF	a		Bortez/Cont=	0.545455	0.727273		Cont/Cont=	0.909091	1.09091	0.636364	=Avg Bort/Cont (10min+wash, 500 nM)
HEK293T	bortezomib 30min, 500nM	4	2	2229.22	2229.15	FK506 Binding Protein	cytoplasm	m	GVQVETISPGDGRTFPKRGQT	c		Bortez/Cont=	0.906667	0.8		Cont/Cont=	1.06667	0.933333	0.853333	=Avg Bort/Cont (10min+wash, 500 nM)
HEK293T	bortezomib 30min, 500nM	2	2	1667.95	1667.91	Phosphatidylethanolamine-binding protein 1	cytoplasm	y	AGAAVDELGKVLTPTQV	k		Bortez/Cont=	1.26984	0.634921		Cont/Cont=	1.04762	0.952381	0.952381	=Avg Bort/Cont (10min+wash, 500 nM)
HEK293T	bortezomib 30min, 500nM	2	2	1815	1814.97	60S acidic ribosomal protein P1	cytoplasm	a	AGVNVEPFWPGLFAKAL	a		Bortez/Cont=	1.52941	0.911765		Cont/Cont=	0.941176	1.05882	1.22059	=Avg Bort/Cont (10min+wash, 500 nM)
HEK293T	bortezomib 30min, 500nM	2	1	963.531	963.514	Protein SET (Phosphatase 2A inhibitor I2PP2A)	cytoplasm	f	VNHPQVSAL	l		Bortez/Cont=	1.89189	0.972973		Cont/Cont=	1.2973	0.702703	1.43243	=Avg Bort/Cont (10min+wash, 500 nM)
HEK293T	bortezomib 30min, 500nM	2	2	2033.03	2033.01	Triosephosphate isomerase 1	cytoplasm	l	ASQPDVDGFLVGGASLKPEF	v		Bortez/Cont=	1.86047	1.16279		Cont/Cont=	1.02326	0.976744	1.51163	=Avg Bort/Cont (10min+wash, 500 nM)
HEK293T	bortezomib 30min, 500nM	3	2	2522.37	2522.34	Triosephosphate isomerase 1	cytoplasm	h	VFGESDELIGQKVAHALAEGLGVIA	c		Bortez/Cont=	2.28571	0.857143		Cont/Cont=	1.25714	0.742857	1.57143	=Avg Bort/Cont (10min+wash, 500 nM)
HEK293T	bortezomib 30min, 500nM	2	1	1431.74	1431.72	60S acidic ribosomal protein P1	cytoplasm	a	GVNVEPFWPGLFA	k		Bortez/Cont=	1.94118	1.35294		Cont/Cont=	1.05882	0.941176	1.64706	=Avg Bort/Cont (10min+wash, 500 nM)
HEK293T	bortezomib 30min, 500nM	2	1	1502.78	1502.76	60S acidic ribosomal protein P1	cytoplasm	a	AGVNVEPFWPGLFA	k		Bortez/Cont=	2.05714	1.25714		Cont/Cont=	1.2	0.8	1.65714	=Avg Bort/Cont (10min+wash, 500 nM)
HEK293T	bortezomib 30min, 500nM	3	2	2333.28	2333.22	Macrophage migration inhibitory factor	cytoplasm	l	AQATGKPPQYIAVHVVPDQLMA	f		Bortez/Cont=	2.10526	1.47368		Cont/Cont=	1.05263	0.947368	1.78947	=Avg Bort/Cont (10min+wash, 500 nM)
HEK293T	bortezomib 30min, 500nM	2	1	1396.8	1396.81	Nucleophosmin	nucleus	l	GGFEITPPVVLRL	k		Bortez/Cont=	2.35	1.6		Cont/Cont=	1	1	1.975	=Avg Bort/Cont (10min+wash, 500 nM)
HEK293T	bortezomib 30min, 500nM	2	1	1856.99	1856.96	Macrophage migration inhibitory factor	cytoplasm	v	PRASVPDGFLSELTQQL	a		Bortez/Cont=	2.22222	2		Cont/Cont=	1.27778	0.722222	2.11111	=Avg Bort/Cont (10min+wash, 500 nM)
HEK293T	bortezomib 30min, 500nM	2	1	1970.95	1970.89	Plasminogen activator inhibitor 1 RNA-binding protein	nucleus	n	RFDQLFDDESDPFEVL	k		Bortez/Cont=	2.5	1.77778		Cont/Cont=	1.11111	0.888889	2.13889	=Avg Bort/Cont (10min+wash, 500 nM)
HEK293T	bortezomib 30min, 500nM	4	3	1558.85	1558.85	Peptidylprolyl isomerase A	cytoplasm	f	ADKVPKTAENFRAL	s		Bortez/Cont=	2.14286	2.14286		Cont/Cont=	1	1	2.14286	=Avg Bort/Cont (10min+wash, 500 nM)
HEK293T	bortezomib 30min, 500nM	4	4	2355.31	2355.28	Heat shock 10kDa protein 1 (chaperonin 10)	mitochondria	s	AAETVTKGGIMLPEKSQGKVLQA	t		Bortez/Cont=	2.97297	1.35135		Cont/Cont=	1.05405	0.945946	2.16216	=Avg Bort/Cont (10min+wash, 500 nM)
HEK293T	bortezomib 30min, 500nM	2	2	825.493	825.496	Triosephosphate isomerase 1	cytoplasm	k	LDPKIAVA	a		Bortez/Cont=	3.14286	1.28571		Cont/Cont=	1	1	2.21429	=Avg Bort/Cont (10min+wash, 500 nM)
HEK293T	bortezomib 30min, 500nM	3	1	1688.88	1688.88	Histone H2B	nucleus	f	VNDIFERIAGEASRL	p		Bortez/Cont=	2.92857	1.5		Cont/Cont=	1.21429	0.785714	2.21429	=Avg Bort/Cont (10min+wash, 500 nM)
HEK293T	bortezomib 30min, 500nM	2	1	1284.68	1284.65	60S acidic ribosomal protein P1	cytoplasm	a	AGVNVEPFWPGL	f		Bortez/Cont=	2.7619	1.80952		Cont/Cont=	1.04762	0.952381	2.28571	=Avg Bort/Cont (10min+wash, 500 nM)
HEK293T	bortezomib 30min, 500nM	2	2	1005.55	1005.55	Eukaryotic translation elongation factor 1 beta	cytoplasm	w	GSSKLVPVGY	g		Bortez/Cont=	3.3	2.25		Cont/Cont=	1.1	0.9	2.775	=Avg Bort/Cont (10min+wash, 500 nM)
HEK293T	bortezomib 30min, 500nM	2	1	1396.82	1396.81	Nucleophosmin	nucleus	s	LGGFEITPPVVLR	l		Bortez/Cont=	3.91304	2.08696		Cont/Cont=	0.956522	1.04348	3	=Avg Bort/Cont (10min+wash, 500 nM)
HEK293T	bortezomib 30min, 500nM	2	1	1067.63	1067.63	Ubiquitin-60S ribosomal protein L40	cytoplasm	g	IIEPSLRQL	a		Bortez/Cont=	6.125	3.75		Cont/Cont=	1.125	0.875	4.9375	=Avg Bort/Cont (10min+wash, 500 nM)
HEK293T	bortezomib 30min, 500nM	2	2	1524.89	1524.86	Peroxiredoxin 5	mitochondria	m	APIKVGDAIPAVEVF	e		Bortez/Cont=	<0.2	<0.2		Cont/Cont=	1.02564	0.974359	<0.2	=Avg Bort/Cont (10min+wash, 500 nM)
HEK293T	bortezomib 30min, 500nM	3	2	2469.37	2469.33	Far upstream element-binding protein 2	nucleus	c	GLVIGRGGENVKAINQQTGAFVEI	s		Bortez/Cont=	<0.2	<0.2		Cont/Cont=	0.857143	1.14286	<0.2	=Avg Bort/Cont (10min+wash, 500 nM)
HEK293T	bortezomib 30min, 500nM	2	1	1360.68	1360.68	60S acidic ribosomal protein P1	cytoplasm	a	GVNVEPFWPGLF	a		Bortez/Cont=	>5	>5		Cont/Cont=	nd	nd	>5	=Avg Bort/Cont (10min+wash, 500 nM)
HEK293T	bortezomib 30min, 500nM	2	2	1630.85	1630.85	60S acidic ribosomal protein P1	cytoplasm	a	AGVNVEPFWPGLFAK	a		Bortez/Cont=	>5	>5		Cont/Cont=	nd	nd	>5	=Avg Bort/Cont (10min+wash, 500 nM)
HEK293T	bortezomib 30min, 500nM	2	2	1743.99	1743.93	60S acidic ribosomal protein P1	cytoplasm	a	GVNVEPFWPGLFAKAL	a		Bortez/Cont=	>5	>5		Cont/Cont=	nd	nd	>5	=Avg Bort/Cont (10min+wash, 500 nM)
HEK293T	bortezomib 30min, 500nM	2	1	1067.58	1067.63	Ubiquitin-60S ribosomal protein L40	cytoplasm	g	IIEPSLRQL	a		Bortez/Cont=	>5	>5		Cont/Cont=	nd	nd	>5	=Avg Bort/Cont (10min+wash, 500 nM)
HEK293T	bortezomib 30min, 500nM	3	3	1496.82	1496.86	60S acidic ribosomal protein P2	cytoplasm	g	KNIEDVIAQGIGKL	a		Bortez/Cont=	>5	>5		Cont/Cont=	nd	nd	>5	=Avg Bort/Cont (10min+wash, 500 nM)
HEK293T	bortezomib 30min, 500nM	3	3	1801.93	1801.93	60S acidic ribosomal protein P1	cytoplasm	h	DDEVTVTEDKINALIK	a		Bortez/Cont=	>5	>5		Cont/Cont=	nd	nd	>5	=Avg Bort/Cont (10min+wash, 500 nM)
HEK293T	bortezomib 30min, 500nM	2	1	2384.24	2384.23	Macrophage migration inhibitory factor	cytoplasm	i	VNTNVPRASVPDGFLSELTQQL	a		Bortez/Cont=	>5	>5		Cont/Cont=	nd	nd	>5	=Avg Bort/Cont (10min+wash, 500 nM)
HEK293T	bortezomib 30min, 500nM	3	3	1668.89	1668.9	60S acidic ribosomal protein P2 polymorphism	cytoplasm	l	DGKNIEDVIAQGIGKL	a		Bortez/Cont=	>5	>5		Cont/Cont=	nd	nd	>5	=Avg Bort/Cont (10min+wash, 500 nM)
HEK293T	bortezomib 30min, 500nM	2	3	1668.93	1668.9	60S acidic ribosomal protein P2 polymorphism	cytoplasm	l	DGKNIEDVIAQGIGKL	a		Bortez/Cont=	>5	>5		Cont/Cont=	nd	nd	>5	=Avg Bort/Cont (10min+wash, 500 nM)
HEK293T	bortezomib 30min, 500nM	2	1	1238.63	1238.63	Histone H2B	nucleus	n	SFVNDIFERI	a		Bortez/Cont=	>5	>5		Cont/Cont=	nd	nd	>5	=Avg Bort/Cont (10min+wash, 500 nM)
HEK293T	bortezomib 30min, 500nM	2	1	1495.76	1495.73	Histone H2B	nucleus	n	SFVNDIFERIAGE	a		Bortez/Cont=	>5	>5		Cont/Cont=	nd	nd	>5	=Avg Bort/Cont (10min+wash, 500 nM)
HEK293T	bortezomib 30min, 500nM	2	1	2171.15	2171.12	Macrophage migration inhibitory factor	cytoplasm	n	TNVPRASVPDGFLSELTQQL	a		Bortez/Cont=	>5	>5		Cont/Cont=	nd	nd	>5	=Avg Bort/Cont (10min+wash, 500 nM)
HEK293T	bortezomib 30min, 500nM	1	1	1086.61	1086.59	Triosephosphate isomerase 1	cytoplasm	q	SLGELIGTLNA	a		Bortez/Cont=	>5	>5		Cont/Cont=	nd	nd	>5	=Avg Bort/Cont (10min+wash, 500 nM)
HEK293T	bortezomib 30min, 500nM	2	1	1079.66	1079.64	Cytochrome b-c1 complex subunit Rieske, mitochondrial		r	GVAGALRPLVQ	a		Bortez/Cont=	>5	>5		Cont/Cont=	nd	nd	>5	=Avg Bort/Cont (10min+wash, 500 nM)
HEK293T	bortezomib 30min, 500nM	2	2	1099.59	1099.57	Heterogeneous nuclear ribonucleoprotein D-like	nucleus	r	GFGFVLFKDA	a		Bortez/Cont=	>5	>5		Cont/Cont=	nd	nd	>5	=Avg Bort/Cont (10min+wash, 500 nM)
HEK293T	bortezomib 30min, 500nM	2	1	1445.77	1445.74	Macrophage migration inhibitory factor	cytoplasm	s	VPDGFLSELTQQL	a		Bortez/Cont=	>5	>5		Cont/Cont=	nd	nd	>5	=Avg Bort/Cont (10min+wash, 500 nM)
HEK293T	bortezomib 30min, 500nM	2	2	1190.61	1190.61	60S acidic ribosomal protein P1	cytoplasm	v	EPFWPGLFAK	a		Bortez/Cont=	>5	>5		Cont/Cont=	nd	nd	>5	=Avg Bort/Cont (10min+wash, 500 nM)
HEK293T	bortezomib 30min, 500nM	2	1	1346.67	1346.67	Macrophage migration inhibitory factor	cytoplasm	v	PDGFLSELTQQL	a		Bortez/Cont=	>5	>5		Cont/Cont=	nd	nd	>5	=Avg Bort/Cont (10min+wash, 500 nM)
HEK293T	bortezomib 30min, 500nM	3	2	1524.89	1524.9	Nucleophosmin	nucleus	l	GGFEITPPVVLRLK	c		Bortez/Cont=	>5	>5		Cont/Cont=	nd	nd	>5	=Avg Bort/Cont (10min+wash, 500 nM)
HEK293T	bortezomib 30min, 500nM	3	3	2090.09	2090.09	Thioredoxin	nucleus	i	ESKTAFQEALDAAGDKLVVV	d		Bortez/Cont=	>5	>5		Cont/Cont=	nd	nd	>5	=Avg Bort/Cont (10min+wash, 500 nM)
HEK293T	bortezomib 30min, 500nM	1	1	773.371	773.375	Heterogeneous nuclear ribonucleoproteins A2/B1 (the motif GFGFVTF is also found in several other proteins!!!)	nucleus	r	GFGFVTF	d		Bortez/Cont=	>5	>5		Cont/Cont=	nd	nd	>5	=Avg Bort/Cont (10min+wash, 500 nM)
HEK293T	bortezomib 30min, 500nM	3	2	1330.66	1330.66	Heat shock 10kDa protein 1 (chaperonin 10)	mitochondria	v	LDDKDYFLFR	d		Bortez/Cont=	>5	>5		Cont/Cont=	nd	nd	>5	=Avg Bort/Cont (10min+wash, 500 nM)
HEK293T	bortezomib 30min, 500nM	3	2	1429.72	1429.72	Heat shock 10kDa protein 1 (chaperonin 10)	mitochondria	v	VLDDKDYFLFR	d		Bortez/Cont=	>5	>5		Cont/Cont=	nd	nd	>5	=Avg Bort/Cont (10min+wash, 500 nM)
HEK293T	bortezomib 30min, 500nM	3	3	1217.63	1217.67	Peptidylprolyl isomerase A	cytoplasm	f	ELFADKVPKTA	e		Bortez/Cont=	>5	>5		Cont/Cont=	nd	nd	>5	=Avg Bort/Cont (10min+wash, 500 nM)
HEK293T	bortezomib 30min, 500nM	3	2	2583.32	2583.3	Protein SET (Phosphatase 2A inhibitor I2PP2A)	cytoplasm	h	IDEVQNEIDRLNEQASEEILKV	e		Bortez/Cont=	>5	>5		Cont/Cont=	nd	nd	>5	=Avg Bort/Cont (10min+wash, 500 nM)
HEK293T	bortezomib 30min, 500nM	3	2	2049.04	2049.04	Heterogeneous nuclear ribonucleoprotein D0	nucleus	k	IFVGGLSPDTPEEKIREY	f		Bortez/Cont=	>5	>5		Cont/Cont=	nd	nd	>5	=Avg Bort/Cont (10min+wash, 500 nM)
HEK293T	bortezomib 30min, 500nM	3	2	2049.06	2049.04	Heterogeneous nuclear ribonucleoprotein D0	nucleus	k	IFVGGLSPDTPEEKIREY	f		Bortez/Cont=	>5	>5		Cont/Cont=	nd	nd	>5	=Avg Bort/Cont (10min+wash, 500 nM)
HEK293T	bortezomib 30min, 500nM	2	2	1088.58	1088.59	Nucleophosmin	nucleus	l	KMSVQPTVSL	g		Bortez/Cont=	>5	>5		Cont/Cont=	nd	nd	>5	=Avg Bort/Cont (10min+wash, 500 nM)
HEK293T	bortezomib 30min, 500nM	3	2	1475.82	1475.83	Histone H2B	nucleus	r	LLLPGELAKHAVSE	g		Bortez/Cont=	>5	>5		Cont/Cont=	nd	nd	>5	=Avg Bort/Cont (10min+wash, 500 nM)
HEK293T	bortezomib 30min, 500nM	2	2	1475.84	1475.83	Histone H2B	nucleus	r	LLLPGELAKHAVSE	g		Bortez/Cont=	>5	>5		Cont/Cont=	nd	nd	>5	=Avg Bort/Cont (10min+wash, 500 nM)
HEK293T	bortezomib 30min, 500nM	2	2	1342.7	1342.72	Macrophage migration inhibitory factor	cytoplasm	l	AQATGKPPQYIAV	h		Bortez/Cont=	>5	>5		Cont/Cont=	nd	nd	>5	=Avg Bort/Cont (10min+wash, 500 nM)
HEK293T	bortezomib 30min, 500nM	2	2	1143.62	1143.63	Macrophage migration inhibitory factor	cytoplasm	q	ATGKPPQYIAV	h		Bortez/Cont=	>5	>5		Cont/Cont=	nd	nd	>5	=Avg Bort/Cont (10min+wash, 500 nM)
HEK293T	bortezomib 30min, 500nM	2	1	1004.53	1004.53	Histone H2B	nucleus	f	VNDIFERI	i		Bortez/Cont=	>5	>5		Cont/Cont=	nd	nd	>5	=Avg Bort/Cont (10min+wash, 500 nM)
HEK293T	bortezomib 30min, 500nM	3	2	1757.91	1757.88	60S acidic ribosomal protein P2	cytoplasm	i	LDSVGIEADDDRLNKV	i		Bortez/Cont=	>5	>5		Cont/Cont=	nd	nd	>5	=Avg Bort/Cont (10min+wash, 500 nM)
HEK293T	bortezomib 30min, 500nM	2	2	1757.92	1757.88	60S acidic ribosomal protein P2	cytoplasm	i	LDSVGIEADDDRLNKV	i		Bortez/Cont=	>5	>5		Cont/Cont=	nd	nd	>5	=Avg Bort/Cont (10min+wash, 500 nM)
HEK293T	bortezomib 30min, 500nM	2	1	1125.58	1125.55	Histone H2B	nucleus	n	SFVNDIFER	i		Bortez/Cont=	>5	>5		Cont/Cont=	nd	nd	>5	=Avg Bort/Cont (10min+wash, 500 nM)
HEK293T	bortezomib 30min, 500nM	4	4	2126.99	2127.03	Enhancer of rudimentary homolog	nucleus	r	ADTQTYQPYNKDWIKEK	i		Bortez/Cont=	>5	>5		Cont/Cont=	nd	nd	>5	=Avg Bort/Cont (10min+wash, 500 nM)
HEK293T	bortezomib 30min, 500nM	2	2	782.354	782.433	Nucleophosmin	nucleus	a	KFINYV	k		Bortez/Cont=	>5	>5		Cont/Cont=	nd	nd	>5	=Avg Bort/Cont (10min+wash, 500 nM)
HEK293T	bortezomib 30min, 500nM	2	2	972.508	972.549	Heterogeneous nuclear ribonucleoprotein D-like	nucleus	a	ASVDKVLEL	k		Bortez/Cont=	>5	>5		Cont/Cont=	nd	nd	>5	=Avg Bort/Cont (10min+wash, 500 nM)
HEK293T	bortezomib 30min, 500nM	3	3	1584.77	1584.85	Heat shock 10kDa protein 1 (chaperonin 10)	mitochondria	a	VGSGSKGKGGEIQPVSV	k		Bortez/Cont=	>5	>5		Cont/Cont=	nd	nd	>5	=Avg Bort/Cont (10min+wash, 500 nM)
HEK293T	bortezomib 30min, 500nM	2	3	1955.04	1955.07	Heat shock 10kDa protein 1 (chaperonin 10)	mitochondria	a	TVVAVGSGSKGKGGEIQPVSV	k		Bortez/Cont=	>5	>5		Cont/Cont=	nd	nd	>5	=Avg Bort/Cont (10min+wash, 500 nM)
HEK293T	bortezomib 30min, 500nM	3	3	1955.06	1955.07	Heat shock 10kDa protein 1 (chaperonin 10)	mitochondria	a	TVVAVGSGSKGKGGEIQPVSV	k		Bortez/Cont=	>5	>5		Cont/Cont=	nd	nd	>5	=Avg Bort/Cont (10min+wash, 500 nM)
HEK293T	bortezomib 30min, 500nM	2	2	856.441	856.465	Nucleophosmin	nucleus	k	GGSLPKVEA	k		Bortez/Cont=	>5	>5		Cont/Cont=	nd	nd	>5	=Avg Bort/Cont (10min+wash, 500 nM)
HEK293T	bortezomib 30min, 500nM	2	1	1687.84	1687.8	Nucleophosmin	nucleus	m	TDQEAIQDLWQWR	k		Bortez/Cont=	>5	>5		Cont/Cont=	nd	nd	>5	=Avg Bort/Cont (10min+wash, 500 nM)
HEK293T	bortezomib 30min, 500nM	2	1	1687.84	1687.8	Nucleophosmin	nucleus	m	TDQEAIQDLWQWR	k		Bortez/Cont=	>5	>5		Cont/Cont=	nd	nd	>5	=Avg Bort/Cont (10min+wash, 500 nM)
HEK293T	bortezomib 30min, 500nM	3	3	1384.69	1384.76	Nucleophosmin	nucleus	q	ASIEKGGSLPKVEA	k		Bortez/Cont=	>5	>5		Cont/Cont=	nd	nd	>5	=Avg Bort/Cont (10min+wash, 500 nM)
HEK293T	bortezomib 30min, 500nM	3	3	1384.71	1384.76	Nucleophosmin	nucleus	q	ASIEKGGSLPKVEA	k		Bortez/Cont=	>5	>5		Cont/Cont=	nd	nd	>5	=Avg Bort/Cont (10min+wash, 500 nM)
HEK293T	bortezomib 30min, 500nM	3	3	1485.75	1485.78	Heat shock 10kDa protein 1 (chaperonin 10)	mitochondria	v	GSGSKGKGGEIQPVSV	k		Bortez/Cont=	>5	>5		Cont/Cont=	nd	nd	>5	=Avg Bort/Cont (10min+wash, 500 nM)
HEK293T	bortezomib 30min, 500nM	2	3	1485.77	1485.78	Heat shock 10kDa protein 1 (chaperonin 10)	mitochondria	v	GSGSKGKGGEIQPVSV	k		Bortez/Cont=	>5	>5		Cont/Cont=	nd	nd	>5	=Avg Bort/Cont (10min+wash, 500 nM)
HEK293T	bortezomib 30min, 500nM	3	3	1655.86	1655.88	Heat shock 10kDa protein 1 (chaperonin 10)	mitochondria	v	AVGSGSKGKGGEIQPVSV	k		Bortez/Cont=	>5	>5		Cont/Cont=	nd	nd	>5	=Avg Bort/Cont (10min+wash, 500 nM)
HEK293T	bortezomib 30min, 500nM	2	3	1655.9	1655.88	Heat shock 10kDa protein 1 (chaperonin 10)	mitochondria	v	AVGSGSKGKGGEIQPVSV	k		Bortez/Cont=	>5	>5		Cont/Cont=	nd	nd	>5	=Avg Bort/Cont (10min+wash, 500 nM)
HEK293T	bortezomib 30min, 500nM	2	1	871.48	871.476	Splicing factor, arginine/serine-rich 1	cytoplasm	y	GAIRDIDL	k		Bortez/Cont=	2.12	1.82		Cont/Cont=	0.91	1.09	>5	=Avg Bort/Cont (10min+wash, 500 nM)
HEK293T	bortezomib 30min, 500nM	2	4	1584.88	1584.88	60S acidic ribosomal protein P2	cytoplasm	a	ALGGNSSPSAKDIKKI	l		Bortez/Cont=	>5	>5		Cont/Cont=	nd	nd	>5	=Avg Bort/Cont (10min+wash, 500 nM)
HEK293T	bortezomib 30min, 500nM	3	4	1584.88	1584.88	60S acidic ribosomal protein P2	cytoplasm	a	ALGGNSSPSAKDIKKI	l		Bortez/Cont=	>5	>5		Cont/Cont=	nd	nd	>5	=Avg Bort/Cont (10min+wash, 500 nM)
HEK293T	bortezomib 30min, 500nM	3	1	1742.96	1742.93	40S Ribosomal protein S28	cytoplasm	e	GDVLTLLESEREARR	l		Bortez/Cont=	>5	>5		Cont/Cont=	nd	nd	>5	=Avg Bort/Cont (10min+wash, 500 nM)
HEK293T	bortezomib 30min, 500nM	3	2	2087.04	2087.04	60S acidic ribosomal protein P2	cytoplasm	i	LDSVGIEADDDRLNKVISE	l		Bortez/Cont=	>5	>5		Cont/Cont=	nd	nd	>5	=Avg Bort/Cont (10min+wash, 500 nM)
HEK293T	bortezomib 30min, 500nM	2	2	2087.11	2087.04	60S acidic ribosomal protein P2	cytoplasm	i	LDSVGIEADDDRLNKVISE	l		Bortez/Cont=	>5	>5		Cont/Cont=	nd	nd	>5	=Avg Bort/Cont (10min+wash, 500 nM)
HEK293T	bortezomib 30min, 500nM	1	1	720.364	720.369	FK506 Binding Protein	cytoplasm	l	(VFDVEL)	l		Bortez/Cont=	>5	>5		Cont/Cont=	nd	nd	>5	=Avg Bort/Cont (10min+wash, 500 nM)
HEK293T	bortezomib 30min, 500nM	2	1	1283.72	1283.72	Nucleophosmin	nucleus	l	GGFEITPPVVLR	l		Bortez/Cont=	>5	>5		Cont/Cont=	nd	nd	>5	=Avg Bort/Cont (10min+wash, 500 nM)
HEK293T	bortezomib 30min, 500nM	4	4	1655.87	1655.92	60S acidic ribosomal protein P2	cytoplasm	l	AALGGNSSPSAKDIKKI	l		Bortez/Cont=	>5	>5		Cont/Cont=	nd	nd	>5	=Avg Bort/Cont (10min+wash, 500 nM)
HEK293T	bortezomib 30min, 500nM	3	1	1460.78	1460.79	Histone H2B	nucleus	r	STITSREIQTAVR	l		Bortez/Cont=	>5	>5		Cont/Cont=	nd	nd	>5	=Avg Bort/Cont (10min+wash, 500 nM)
HEK293T	bortezomib 30min, 500nM	3	3	1573.87	1573.87	Heat shock 10kDa protein 1 (chaperonin 10)	mitochondria	v	GDKVLLPEYGGTKVV	l		Bortez/Cont=	>5	>5		Cont/Cont=	nd	nd	>5	=Avg Bort/Cont (10min+wash, 500 nM)
HEK293T	bortezomib 30min, 500nM	2	3	1573.87	1573.87	Heat shock 10kDa protein 1 (chaperonin 10)	mitochondria	v	GDKVLLPEYGGTKVV	l		Bortez/Cont=	>5	>5		Cont/Cont=	nd	nd	>5	=Avg Bort/Cont (10min+wash, 500 nM)
HEK293T	bortezomib 30min, 500nM	4	4	1800.98	1801.03	Heat shock 10kDa protein 1 (chaperonin 10)	mitochondria	v	KVGDKVLLPEYGGTKVV	l		Bortez/Cont=	>5	>5		Cont/Cont=	nd	nd	>5	=Avg Bort/Cont (10min+wash, 500 nM)
HEK293T	bortezomib 30min, 500nM	3	4	1800.99	1801.03	Heat shock 10kDa protein 1 (chaperonin 10)	mitochondria	v	KVGDKVLLPEYGGTKVV	l		Bortez/Cont=	>5	>5		Cont/Cont=	nd	nd	>5	=Avg Bort/Cont (10min+wash, 500 nM)
HEK293T	bortezomib 30min, 500nM	4	4	2203.15	2203.22	60S acidic ribosomal protein P2	cytoplasm	v	ASYLLAALGGNSSPSAKDIKKI	l		Bortez/Cont=	>5	>5		Cont/Cont=	nd	nd	>5	=Avg Bort/Cont (10min+wash, 500 nM)
HEK293T	bortezomib 30min, 500nM	2	2	1996.97	1996.9	Acyl carrier protein, mitochondrial	mitochondria	a	MEDEFGFEIPDIDAEKL	m		Bortez/Cont=	>5	>5		Cont/Cont=	nd	nd	>5	=Avg Bort/Cont (10min+wash, 500 nM)
HEK293T	bortezomib 30min, 500nM	3	2	2859.35	2859.3	Eukaryotic translation elongation factor 1 beta	cytoplasm	c	VVEDDKVGTDMLEEQITAFEDYVQS	m		Bortez/Cont=	>5	>5		Cont/Cont=	nd	nd	>5	=Avg Bort/Cont (10min+wash, 500 nM)
HEK293T	bortezomib 30min, 500nM	2	1	2131.18	2131.14	Macrophage migration inhibitory factor	cytoplasm	l	AQATGKPPQYIAVHVVPDQL	m		Bortez/Cont=	>5	>5		Cont/Cont=	nd	nd	>5	=Avg Bort/Cont (10min+wash, 500 nM)
HEK293T	bortezomib 30min, 500nM	3	1	2015.01	2014.98	Protein SET (Phosphatase 2A inhibitor I2PP2A)	cytoplasm	a	LLGEEDEEALHYLTRVE	n		Bortez/Cont=	>5	>5		Cont/Cont=	nd	nd	>5	=Avg Bort/Cont (10min+wash, 500 nM)
HEK293T	bortezomib 30min, 500nM	3	2	2200.12	2200.12	60S acidic ribosomal protein P2	cytoplasm	i	LDSVGIEADDDRLNKVISEL	n		Bortez/Cont=	>5	>5		Cont/Cont=	nd	nd	>5	=Avg Bort/Cont (10min+wash, 500 nM)
HEK293T	bortezomib 30min, 500nM	2	1	1486.81	1486.78	Vimentin	cytoplasm	l	PLPNFSSLNLRET	n		Bortez/Cont=	>5	>5		Cont/Cont=	nd	nd	>5	=Avg Bort/Cont (10min+wash, 500 nM)
HEK293T	bortezomib 30min, 500nM	2	2	1785.94	1785.91	60S acidic ribosomal protein P2	cytoplasm	v	GIEADDDRLNKVISEL	n		Bortez/Cont=	>5	>5		Cont/Cont=	nd	nd	>5	=Avg Bort/Cont (10min+wash, 500 nM)
HEK293T	bortezomib 30min, 500nM	2	2	1118.56	1118.6	Heat shock 10kDa protein 1 (chaperonin 10)	mitochondria	a	AETVTKGGIML	p		Bortez/Cont=	>5	>5		Cont/Cont=	nd	nd	>5	=Avg Bort/Cont (10min+wash, 500 nM)
HEK293T	bortezomib 30min, 500nM	2	2	1159.64	1159.62	Eukaryotic translation elongation factor 1 beta	cytoplasm	a	DGLVWGSSKLV	p		Bortez/Cont=	>5	>5		Cont/Cont=	nd	nd	>5	=Avg Bort/Cont (10min+wash, 500 nM)
HEK293T	bortezomib 30min, 500nM	2	2	1432.77	1432.77	Heat shock 10kDa protein 1 (chaperonin 10)	mitochondria	e	RSAAETVTKGGIML	p		Bortez/Cont=	>5	>5		Cont/Cont=	nd	nd	>5	=Avg Bort/Cont (10min+wash, 500 nM)
HEK293T	bortezomib 30min, 500nM	2	2	1358.73	1358.72	Eukaryotic translation elongation factor 1 beta	cytoplasm	i	QADGLVWGSSKLV	p		Bortez/Cont=	>5	>5		Cont/Cont=	nd	nd	>5	=Avg Bort/Cont (10min+wash, 500 nM)
HEK293T	bortezomib 30min, 500nM	3	2	1677.91	1677.92	Macrophage migration inhibitory factor	cytoplasm	l	AQATGKPPQYIAVHVV	p		Bortez/Cont=	>5	>5		Cont/Cont=	nd	nd	>5	=Avg Bort/Cont (10min+wash, 500 nM)
HEK293T	bortezomib 30min, 500nM	2	2	1677.94	1677.92	Macrophage migration inhibitory factor	cytoplasm	l	AQATGKPPQYIAVHVV	p		Bortez/Cont=	>5	>5		Cont/Cont=	nd	nd	>5	=Avg Bort/Cont (10min+wash, 500 nM)
HEK293T	bortezomib 30min, 500nM	2	1	1537.66	1537.64	Small nuclear ribonucleoprotein polypeptide C	nucleus	m	PAPHMGGPPMMPMMG	p		Bortez/Cont=	>5	>5		Cont/Cont=	nd	nd	>5	=Avg Bort/Cont (10min+wash, 500 nM)
HEK293T	bortezomib 30min, 500nM	2	2	743.407	743.454	60S acidic ribosomal protein P2	cytoplasm	q	GIGKLASV	p		Bortez/Cont=	>5	>5		Cont/Cont=	nd	nd	>5	=Avg Bort/Cont (10min+wash, 500 nM)
HEK293T	bortezomib 30min, 500nM	2	2	1384.78	1384.79	Triosephosphate isomerase 1	cytoplasm	q	SLGELIGTLNAAKV	p		Bortez/Cont=	>5	>5		Cont/Cont=	nd	nd	>5	=Avg Bort/Cont (10min+wash, 500 nM)
HEK293T	bortezomib 30min, 500nM	2	1	1282.63	1282.61	Heterogeneous nuclear ribonucleoprotein D0	nucleus	y	FGGFGEVESIEL	p		Bortez/Cont=	>5	>5		Cont/Cont=	nd	nd	>5	=Avg Bort/Cont (10min+wash, 500 nM)
HEK293T	bortezomib 30min, 500nM	2	1	1337.68	1337.65	Heterogeneous nuclear ribonucleoprotein D-like	nucleus	y	FGAFGEIENIEL	p		Bortez/Cont=	>5	>5		Cont/Cont=	nd	nd	>5	=Avg Bort/Cont (10min+wash, 500 nM)
HEK293T	bortezomib 30min, 500nM	4	3	2066.11	2066.15	Phosphatidylethanolamine-binding protein 1	cytoplasm	y	AGAAVDELGKVLTPTQVKNR	p		Bortez/Cont=	>5	>5		Cont/Cont=	nd	nd	>5	=Avg Bort/Cont (10min+wash, 500 nM)
HEK293T	bortezomib 30min, 500nM	2	1	1228.73	1228.7	Far upstream element-binding protein 1	nucleus	a	AEIITDLLRSV	q		Bortez/Cont=	>5	>5		Cont/Cont=	nd	nd	>5	=Avg Bort/Cont (10min+wash, 500 nM)
HEK293T	bortezomib 30min, 500nM	2	1	826.49	826.491	Ubiquitin-60S ribosomal protein L40	cytoplasm	g	IIEPSLR	q		Bortez/Cont=	>5	>5		Cont/Cont=	nd	nd	>5	=Avg Bort/Cont (10min+wash, 500 nM)
HEK293T	bortezomib 30min, 500nM	2	1	1299.78	1299.74	Far upstream element-binding protein 1	nucleus	h	AAEIITDLLRSV	q		Bortez/Cont=	>5	>5		Cont/Cont=	nd	nd	>5	=Avg Bort/Cont (10min+wash, 500 nM)
HEK293T	bortezomib 30min, 500nM	3	3	1455.73	1455.81	Heat shock 10kDa protein 1 (chaperonin 10)	mitochondria	k	GGIMLPEKSQGKVL	q		Bortez/Cont=	>5	>5		Cont/Cont=	nd	nd	>5	=Avg Bort/Cont (10min+wash, 500 nM)
HEK293T	bortezomib 30min, 500nM	2	3	1455.79	1455.81	Heat shock 10kDa protein 1 (chaperonin 10)	mitochondria	k	GGIMLPEKSQGKVL	q		Bortez/Cont=	>5	>5		Cont/Cont=	nd	nd	>5	=Avg Bort/Cont (10min+wash, 500 nM)
HEK293T	bortezomib 30min, 500nM	3	1	1082.58	1082.66	Vimentin	cytoplasm	l	RSSVPGVRLL	q		Bortez/Cont=	>5	>5		Cont/Cont=	nd	nd	>5	=Avg Bort/Cont (10min+wash, 500 nM)
HEK293T	bortezomib 30min, 500nM	2	1	926.527	926.555	Vimentin	cytoplasm	r	SSVPGVRLL	q		Bortez/Cont=	>5	>5		Cont/Cont=	nd	nd	>5	=Avg Bort/Cont (10min+wash, 500 nM)
HEK293T	bortezomib 30min, 500nM	2	1	1105.54	1105.53	Macrophage migration inhibitory factor	cytoplasm	v	PDGFLSELTQ	q		Bortez/Cont=	>5	>5		Cont/Cont=	nd	nd	>5	=Avg Bort/Cont (10min+wash, 500 nM)
HEK293T	bortezomib 30min, 500nM	1	1	1105.55	1105.53	Macrophage migration inhibitory factor	cytoplasm	v	PDGFLSELTQ	q		Bortez/Cont=	>5	>5		Cont/Cont=	nd	nd	>5	=Avg Bort/Cont (10min+wash, 500 nM)
HEK293T	bortezomib 30min, 500nM	2	1	1630.85	1630.77	Protein SET (Phosphatase 2A inhibitor I2PP2A)	cytoplasm	a	LLGEEDEEALHYLT	r		Bortez/Cont=	>5	>5		Cont/Cont=	nd	nd	>5	=Avg Bort/Cont (10min+wash, 500 nM)
HEK293T	bortezomib 30min, 500nM	2	1	1430.75	1430.73	40S Ribosomal protein S28	cytoplasm	e	GDVLTLLESEREA	r		Bortez/Cont=	>5	>5		Cont/Cont=	nd	nd	>5	=Avg Bort/Cont (10min+wash, 500 nM)
HEK293T	bortezomib 30min, 500nM	4	1	1856.03	1856.01	40S Ribosomal protein S28	cytoplasm	e	GDVLTLLESEREARRL	r		Bortez/Cont=	>5	>5		Cont/Cont=	nd	nd	>5	=Avg Bort/Cont (10min+wash, 500 nM)
HEK293T	bortezomib 30min, 500nM	3	1	1856.04	1856.01	40S Ribosomal protein S28	cytoplasm	e	GDVLTLLESEREARRL	r		Bortez/Cont=	>5	>5		Cont/Cont=	nd	nd	>5	=Avg Bort/Cont (10min+wash, 500 nM)
HEK293T	bortezomib 30min, 500nM	2	1	1199.69	1199.69	Heat shock 10kDa protein 1 (chaperonin 10)	mitochondria	f	LPLFDRVLVE	r		Bortez/Cont=	>5	>5		Cont/Cont=	nd	nd	>5	=Avg Bort/Cont (10min+wash, 500 nM)
HEK293T	bortezomib 30min, 500nM	2	1	1346.82	1346.76	Heat shock 10kDa protein 1 (chaperonin 10)	mitochondria	k	FLPLFDRVLVE	r		Bortez/Cont=	>5	>5		Cont/Cont=	nd	nd	>5	=Avg Bort/Cont (10min+wash, 500 nM)
HEK293T	bortezomib 30min, 500nM	2	1	1086.6	1086.61	Heat shock 10kDa protein 1 (chaperonin 10)	mitochondria	l	PLFDRVLVE	r		Bortez/Cont=	>5	>5		Cont/Cont=	nd	nd	>5	=Avg Bort/Cont (10min+wash, 500 nM)
HEK293T	bortezomib 30min, 500nM	1	1	1127.65	1127.62	Nucleophosmin	nucleus	l	GGFEITPPVVL	r		Bortez/Cont=	>5	>5		Cont/Cont=	nd	nd	>5	=Avg Bort/Cont (10min+wash, 500 nM)
HEK293T	bortezomib 30min, 500nM	2	1	2158.17	2158.13	Transcription factor BTF3	nucleus	l	TEMLPSILNQLGADSLTSLR	r		Bortez/Cont=	>5	>5		Cont/Cont=	nd	nd	>5	=Avg Bort/Cont (10min+wash, 500 nM)
HEK293T	bortezomib 30min, 500nM	2	1	1188.58	1188.58	Vimentin	cytoplasm	r	DNLAEDIMRL	r		Bortez/Cont=	>5	>5		Cont/Cont=	nd	nd	>5	=Avg Bort/Cont (10min+wash, 500 nM)
HEK293T	bortezomib 30min, 500nM	2	1	1495.79	1495.69	Vimentin	cytoplasm	r	LGDLYEEEMREL	r		Bortez/Cont=	>5	>5		Cont/Cont=	nd	nd	>5	=Avg Bort/Cont (10min+wash, 500 nM)
HEK293T	bortezomib 30min, 500nM	2	2	1174.54	1174.55	Heat shock 10kDa protein 1 (chaperonin 10)	mitochondria	v	LDDKDYFLF	r		Bortez/Cont=	>5	>5		Cont/Cont=	nd	nd	>5	=Avg Bort/Cont (10min+wash, 500 nM)
HEK293T	bortezomib 30min, 500nM	2	2	1273.62	1273.62	Heat shock 10kDa protein 1 (chaperonin 10)	mitochondria	v	VLDDKDYFLF	r		Bortez/Cont=	>5	>5		Cont/Cont=	nd	nd	>5	=Avg Bort/Cont (10min+wash, 500 nM)
HEK293T	bortezomib 30min, 500nM	3	2	1269.7	1269.71	Splicing factor, arginine/serine-rich 1	cytoplasm	y	GAIRDIDLKNR	r		Bortez/Cont=	>5	>5		Cont/Cont=	nd	nd	>5	=Avg Bort/Cont (10min+wash, 500 nM)
HEK293T	bortezomib 30min, 500nM	2	2	1346.63	1346.65	Cytochrome c oxidase subunit 5a	mitochondria	y	FNKPDIDAWEL	r		Bortez/Cont=	>5	>5		Cont/Cont=	nd	nd	>5	=Avg Bort/Cont (10min+wash, 500 nM)
HEK293T	bortezomib 30min, 500nM	2	2	1431.74	1431.76	Thioredoxin	nucleus	e	ALDAAGDKLVVVDF	s		Bortez/Cont=	>5	>5		Cont/Cont=	nd	nd	>5	=Avg Bort/Cont (10min+wash, 500 nM)
HEK293T	bortezomib 30min, 500nM	3	1	1355.83	1355.79	Heat shock 10kDa protein 1 (chaperonin 10)	mitochondria	f	LPLFDRVLVER	s		Bortez/Cont=	>5	>5		Cont/Cont=	nd	nd	>5	=Avg Bort/Cont (10min+wash, 500 nM)
HEK293T	bortezomib 30min, 500nM	3	3	2352.18	2352.18	Thioredoxin	nucleus	i	ESKTAFQEALDAAGDKLVVVDF	s		Bortez/Cont=	>5	>5		Cont/Cont=	nd	nd	>5	=Avg Bort/Cont (10min+wash, 500 nM)
HEK293T	bortezomib 30min, 500nM	3	1	1502.89	1502.86	Heat shock 10kDa protein 1 (chaperonin 10)	mitochondria	k	FLPLFDRVLVER	s		Bortez/Cont=	>5	>5		Cont/Cont=	nd	nd	>5	=Avg Bort/Cont (10min+wash, 500 nM)
HEK293T	bortezomib 30min, 500nM	2	1	1242.71	1242.71	Heat shock 10kDa protein 1 (chaperonin 10)	mitochondria	l	PLFDRVLVER	s		Bortez/Cont=	>5	>5		Cont/Cont=	nd	nd	>5	=Avg Bort/Cont (10min+wash, 500 nM)
HEK293T	bortezomib 30min, 500nM	2	2	1996.97	1996.95	Acidic nuclear phosphoprotein pp32	nucleus	n	EGKLEGLTDEFEELEFL	s		Bortez/Cont=	>5	>5		Cont/Cont=	nd	nd	>5	=Avg Bort/Cont (10min+wash, 500 nM)
HEK293T	bortezomib 30min, 500nM	2	2	1365.78	1365.8	60S acidic ribosomal protein P2	cytoplasm	q	GIGKLASVPAGGAVAV	s		Bortez/Cont=	>5	>5		Cont/Cont=	nd	nd	>5	=Avg Bort/Cont (10min+wash, 500 nM)
HEK293T	bortezomib 30min, 500nM	4	3	2281.29	2281.21	Peptidylprolyl isomerase A	cytoplasm	r	VSFELFADKVPKTAENFRAL	s		Bortez/Cont=	>5	>5		Cont/Cont=	nd	nd	>5	=Avg Bort/Cont (10min+wash, 500 nM)
HEK293T	bortezomib 30min, 500nM	2	1	1529.78	1529.72	Protein SET (Phosphatase 2A inhibitor I2PP2A)	cytoplasm	a	LLGEEDEEALHYL	t		Bortez/Cont=	>5	>5		Cont/Cont=	nd	nd	>5	=Avg Bort/Cont (10min+wash, 500 nM)
HEK293T	bortezomib 30min, 500nM	4	4	2284.27	2284.25	Heat shock 10kDa protein 1 (chaperonin 10)	mitochondria	a	AETVTKGGIMLPEKSQGKVLQA	t		Bortez/Cont=	>5	>5		Cont/Cont=	nd	nd	>5	=Avg Bort/Cont (10min+wash, 500 nM)
HEK293T	bortezomib 30min, 500nM	2	1	1913.99	1913.98	Macrophage migration inhibitory factor	cytoplasm	i	VNTNVPRASVPDGFLSEL	t		Bortez/Cont=	>5	>5		Cont/Cont=	nd	nd	>5	=Avg Bort/Cont (10min+wash, 500 nM)
HEK293T	bortezomib 30min, 500nM	3	3	1654.81	1654.91	Heat shock 10kDa protein 1 (chaperonin 10)	mitochondria	k	GGIMLPEKSQGKVLQA	t		Bortez/Cont=	>5	>5		Cont/Cont=	nd	nd	>5	=Avg Bort/Cont (10min+wash, 500 nM)
HEK293T	bortezomib 30min, 500nM	2	3	1654.93	1654.91	Heat shock 10kDa protein 1 (chaperonin 10)	mitochondria	k	GGIMLPEKSQGKVLQA	t		Bortez/Cont=	>5	>5		Cont/Cont=	nd	nd	>5	=Avg Bort/Cont (10min+wash, 500 nM)
HEK293T	bortezomib 30min, 500nM	4	4	2442.36	2442.32	Heat shock 10kDa protein 1 (chaperonin 10)	mitochondria	r	SAAETVTKGGIMLPEKSQGKVLQA	t		Bortez/Cont=	>5	>5		Cont/Cont=	nd	nd	>5	=Avg Bort/Cont (10min+wash, 500 nM)
HEK293T	bortezomib 30min, 500nM	1	1	975.522	975.491	Macrophage migration inhibitory factor	cytoplasm	s	VPDGFLSEL	t		Bortez/Cont=	>5	>5		Cont/Cont=	nd	nd	>5	=Avg Bort/Cont (10min+wash, 500 nM)
HEK293T	bortezomib 30min, 500nM	2	1	1715.87	1715.87	Macrophage migration inhibitory factor	cytoplasm	s	VPDGFLSELTQQLAQA	t		Bortez/Cont=	>5	>5		Cont/Cont=	nd	nd	>5	=Avg Bort/Cont (10min+wash, 500 nM)
HEK293T	bortezomib 30min, 500nM	2	1	1616.87	1616.8	Macrophage migration inhibitory factor	cytoplasm	v	PDGFLSELTQQLAQA	t		Bortez/Cont=	>5	>5		Cont/Cont=	nd	nd	>5	=Avg Bort/Cont (10min+wash, 500 nM)
HEK293T	bortezomib 30min, 500nM	2	2	1141.64	1141.63	Phosphatidylethanolamine-binding protein 1	cytoplasm	y	AGAAVDELGKVL	t		Bortez/Cont=	>5	>5		Cont/Cont=	nd	nd	>5	=Avg Bort/Cont (10min+wash, 500 nM)
HEK293T	bortezomib 30min, 500nM	3	1	1786.91	1786.87	Protein SET (Phosphatase 2A inhibitor I2PP2A)	cytoplasm	a	LLGEEDEEALHYLTR	v		Bortez/Cont=	>5	>5		Cont/Cont=	nd	nd	>5	=Avg Bort/Cont (10min+wash, 500 nM)
HEK293T	bortezomib 30min, 500nM	2	2	1406.73	1406.73	Histidine triad nucleotide-binding protein 1	cytoplasm	c	AADLGLNKGYRMV	v		Bortez/Cont=	>5	>5		Cont/Cont=	nd	nd	>5	=Avg Bort/Cont (10min+wash, 500 nM)
HEK293T	bortezomib 30min, 500nM	3	2	1406.73	1406.73	Histidine triad nucleotide-binding protein 1	cytoplasm	c	AADLGLNKGYRMV	v		Bortez/Cont=	>5	>5		Cont/Cont=	nd	nd	>5	=Avg Bort/Cont (10min+wash, 500 nM)
HEK293T	bortezomib 30min, 500nM	4	1	2619.3	2619.29	Protein SET (Phosphatase 2A inhibitor I2PP2A)	cytoplasm	f	VNHPQVSALLGEEDEEALHYLTR	v		Bortez/Cont=	>5	>5		Cont/Cont=	nd	nd	>5	=Avg Bort/Cont (10min+wash, 500 nM)
HEK293T	bortezomib 30min, 500nM	3	1	2619.31	2619.29	Protein SET (Phosphatase 2A inhibitor I2PP2A)	cytoplasm	f	VNHPQVSALLGEEDEEALHYLTR	v		Bortez/Cont=	>5	>5		Cont/Cont=	nd	nd	>5	=Avg Bort/Cont (10min+wash, 500 nM)
HEK293T	bortezomib 30min, 500nM	3	2	1164.61	1164.61	Splicing factor, arginine/serine-rich 1	cytoplasm	h	EGETAYIRVK	v		Bortez/Cont=	>5	>5		Cont/Cont=	nd	nd	>5	=Avg Bort/Cont (10min+wash, 500 nM)
HEK293T	bortezomib 30min, 500nM	3	1	2269.17	2269.12	Protein SET (Phosphatase 2A inhibitor I2PP2A)	cytoplasm	h	PQVSALLGEEDEEALHYLTR	v		Bortez/Cont=	>5	>5		Cont/Cont=	nd	nd	>5	=Avg Bort/Cont (10min+wash, 500 nM)
HEK293T	bortezomib 30min, 500nM	3	1	2497.28	2497.23	Protein SET (Phosphatase 2A inhibitor I2PP2A)	cytoplasm	h	PQVSALLGEEDEEALHYLTRVE	v		Bortez/Cont=	>5	>5		Cont/Cont=	nd	nd	>5	=Avg Bort/Cont (10min+wash, 500 nM)
HEK293T	bortezomib 30min, 500nM	2	1	906.522	906.496	Heat shock 10kDa protein 1 (chaperonin 10)	mitochondria	k	FLPLFDR	v		Bortez/Cont=	>5	>5		Cont/Cont=	nd	nd	>5	=Avg Bort/Cont (10min+wash, 500 nM)
HEK293T	bortezomib 30min, 500nM	2	2	1174.61	1174.66	Heat shock 10kDa protein 1 (chaperonin 10)	mitochondria	k	VLLPEYGGTKV	v		Bortez/Cont=	>5	>5		Cont/Cont=	nd	nd	>5	=Avg Bort/Cont (10min+wash, 500 nM)
HEK293T	bortezomib 30min, 500nM	2	1	1376.67	1376.64	Myosin light polypeptide 6, non-muscle isoform	cytoplasm	l	DFEHFLPMLQT	v		Bortez/Cont=	>5	>5		Cont/Cont=	nd	nd	>5	=Avg Bort/Cont (10min+wash, 500 nM)
HEK293T	bortezomib 30min, 500nM	3	2	1479.77	1479.78	Macrophage migration inhibitory factor	cytoplasm	l	AQATGKPPQYIAVH	v		Bortez/Cont=	>5	>5		Cont/Cont=	nd	nd	>5	=Avg Bort/Cont (10min+wash, 500 nM)
HEK293T	bortezomib 30min, 500nM	3	1	1857.95	1857.91	Protein SET (Phosphatase 2A inhibitor I2PP2A)	cytoplasm	s	ALLGEEDEEALHYLTR	v		Bortez/Cont=	>5	>5		Cont/Cont=	nd	nd	>5	=Avg Bort/Cont (10min+wash, 500 nM)
HEK293T	bortezomib 30min, 500nM	4	2	2907.55	2907.51	Macrophage migration inhibitory factor	cytoplasm	s	VPDGFLSELTQQLAQATGKPPQYIAVH	v		Bortez/Cont=	>5	>5		Cont/Cont=	nd	nd	>5	=Avg Bort/Cont (10min+wash, 500 nM)
HEK293T	bortezomib 30min, 500nM	3	2	2907.58	2907.51	Macrophage migration inhibitory factor	cytoplasm	s	VPDGFLSELTQQLAQATGKPPQYIAVH	v		Bortez/Cont=	>5	>5		Cont/Cont=	nd	nd	>5	=Avg Bort/Cont (10min+wash, 500 nM)
HEK293T	bortezomib 30min, 500nM	3	3	1474.82	1474.8	Heat shock 10kDa protein 1 (chaperonin 10)	mitochondria	v	GDKVLLPEYGGTKV	v		Bortez/Cont=	>5	>5		Cont/Cont=	nd	nd	>5	=Avg Bort/Cont (10min+wash, 500 nM)
HEK293T	bortezomib 30min, 500nM	2	1	1489.76	1489.73	Myosin light polypeptide 6, non-muscle isoform	cytoplasm	v	LDFEHFLPMLQT	v		Bortez/Cont=	>5	>5		Cont/Cont=	nd	nd	>5	=Avg Bort/Cont (10min+wash, 500 nM)
HEK293T	bortezomib 30min, 500nM	3	2	2808.5	2808.44	Macrophage migration inhibitory factor	cytoplasm	v	PDGFLSELTQQLAQATGKPPQYIAVH	v		Bortez/Cont=	>5	>5		Cont/Cont=	nd	nd	>5	=Avg Bort/Cont (10min+wash, 500 nM)
HEK293T	bortezomib 30min, 500nM	3	2	2876.36	2876.38	Eukaryotic translation elongation factor 1 beta	cytoplasm	v	LNDYLADKSYIEGYVPSQADVAVFEA	v		Bortez/Cont=	>5	>5		Cont/Cont=	nd	nd	>5	=Avg Bort/Cont (10min+wash, 500 nM)
HEK293T	bortezomib 30min, 500nM	3	2	2544.21	2544.2	Protein SET (Phosphatase 2A inhibitor I2PP2A)	cytoplasm	h	SDAGADELGEVIKDDIWPNPLQY	y		Bortez/Cont=	>5	>5		Cont/Cont=	nd	nd	>5	=Avg Bort/Cont (10min+wash, 500 nM)
HEK293T	bortezomib 30min, 500nM	3	2	3248.74								Bortez/Cont=	1.25	1		Cont/Cont=	1	1	1.125	=Avg Bort/Cont (10min+wash, 500 nM)
HEK293T	bortezomib 30min, 500nM	2	1	1244.71								Bortez/Cont=	4.94737	1.15789		Cont/Cont=	1.26316	0.736842	3.05263	=Avg Bort/Cont (10min+wash, 500 nM)
HEK293T	bortezomib 30min, 500nM	1	1	565.3								Bortez/Cont=	>5	>5		Cont/Cont=	nd	nd	>5	=Avg Bort/Cont (10min+wash, 500 nM)
HEK293T	bortezomib 30min, 500nM	1	1	636.31								Bortez/Cont=	>5	>5		Cont/Cont=	nd	nd	>5	=Avg Bort/Cont (10min+wash, 500 nM)
HEK293T	bortezomib 30min, 500nM	1	1	707.376								Bortez/Cont=	>5	>5		Cont/Cont=	nd	nd	>5	=Avg Bort/Cont (10min+wash, 500 nM)
HEK293T	bortezomib 30min, 500nM	1	1	719.378								Bortez/Cont=	>5	>5		Cont/Cont=	nd	nd	>5	=Avg Bort/Cont (10min+wash, 500 nM)
HEK293T	bortezomib 30min, 500nM	2	1	751.354								Bortez/Cont=	>5	>5		Cont/Cont=	nd	nd	>5	=Avg Bort/Cont (10min+wash, 500 nM)
HEK293T	bortezomib 30min, 500nM	1	1	772.474								Bortez/Cont=	>5	>5		Cont/Cont=	nd	nd	>5	=Avg Bort/Cont (10min+wash, 500 nM)
HEK293T	bortezomib 30min, 500nM	1	1	774.412								Bortez/Cont=	>5	>5		Cont/Cont=	nd	nd	>5	=Avg Bort/Cont (10min+wash, 500 nM)
HEK293T	bortezomib 30min, 500nM	2	1	777.433								Bortez/Cont=	>5	>5		Cont/Cont=	nd	nd	>5	=Avg Bort/Cont (10min+wash, 500 nM)
HEK293T	bortezomib 30min, 500nM	1	1	785.416								Bortez/Cont=	>5	>5		Cont/Cont=	nd	nd	>5	=Avg Bort/Cont (10min+wash, 500 nM)
HEK293T	bortezomib 30min, 500nM	1	1	787.396								Bortez/Cont=	>5	>5		Cont/Cont=	nd	nd	>5	=Avg Bort/Cont (10min+wash, 500 nM)
HEK293T	bortezomib 30min, 500nM	1	1	799.436								Bortez/Cont=	>5	>5		Cont/Cont=	nd	nd	>5	=Avg Bort/Cont (10min+wash, 500 nM)
HEK293T	bortezomib 30min, 500nM	2	1	811.456								Bortez/Cont=	>5	>5		Cont/Cont=	nd	nd	>5	=Avg Bort/Cont (10min+wash, 500 nM)
HEK293T	bortezomib 30min, 500nM	1	1	815.472								Bortez/Cont=	>5	>5		Cont/Cont=	nd	nd	>5	=Avg Bort/Cont (10min+wash, 500 nM)
HEK293T	bortezomib 30min, 500nM	2	1	840.492								Bortez/Cont=	>5	>5		Cont/Cont=	nd	nd	>5	=Avg Bort/Cont (10min+wash, 500 nM)
HEK293T	bortezomib 30min, 500nM	2	1	850.458								Bortez/Cont=	>5	>5		Cont/Cont=	nd	nd	>5	=Avg Bort/Cont (10min+wash, 500 nM)
HEK293T	bortezomib 30min, 500nM	1	1	867.486								Bortez/Cont=	>5	>5		Cont/Cont=	nd	nd	>5	=Avg Bort/Cont (10min+wash, 500 nM)
HEK293T	bortezomib 30min, 500nM	1	1	873.461								Bortez/Cont=	>5	>5		Cont/Cont=	nd	nd	>5	=Avg Bort/Cont (10min+wash, 500 nM)
HEK293T	bortezomib 30min, 500nM	1	1	876.449								Bortez/Cont=	>5	>5		Cont/Cont=	nd	nd	>5	=Avg Bort/Cont (10min+wash, 500 nM)
HEK293T	bortezomib 30min, 500nM	1	1	897.484								Bortez/Cont=	>5	>5		Cont/Cont=	nd	nd	>5	=Avg Bort/Cont (10min+wash, 500 nM)
HEK293T	bortezomib 30min, 500nM	1	1	900.457								Bortez/Cont=	>5	>5		Cont/Cont=	nd	nd	>5	=Avg Bort/Cont (10min+wash, 500 nM)
HEK293T	bortezomib 30min, 500nM	2	1	920.506								Bortez/Cont=	>5	>5		Cont/Cont=	nd	nd	>5	=Avg Bort/Cont (10min+wash, 500 nM)
HEK293T	bortezomib 30min, 500nM	1	1	920.535								Bortez/Cont=	>5	>5		Cont/Cont=	nd	nd	>5	=Avg Bort/Cont (10min+wash, 500 nM)
HEK293T	bortezomib 30min, 500nM	2	1	925.491								Bortez/Cont=	>5	>5		Cont/Cont=	nd	nd	>5	=Avg Bort/Cont (10min+wash, 500 nM)
HEK293T	bortezomib 30min, 500nM	1	1	1004.5								Bortez/Cont=	>5	>5		Cont/Cont=	nd	nd	>5	=Avg Bort/Cont (10min+wash, 500 nM)
HEK293T	bortezomib 30min, 500nM	3	1	1006.62								Bortez/Cont=	>5	>5		Cont/Cont=	nd	nd	>5	=Avg Bort/Cont (10min+wash, 500 nM)
HEK293T	bortezomib 30min, 500nM	1	1	1007.5								Bortez/Cont=	>5	>5		Cont/Cont=	nd	nd	>5	=Avg Bort/Cont (10min+wash, 500 nM)
HEK293T	bortezomib 30min, 500nM	1	1	1010.59								Bortez/Cont=	>5	>5		Cont/Cont=	nd	nd	>5	=Avg Bort/Cont (10min+wash, 500 nM)
HEK293T	bortezomib 30min, 500nM	2	2	1012.48								Bortez/Cont=	>5	>5		Cont/Cont=	nd	nd	>5	=Avg Bort/Cont (10min+wash, 500 nM)
HEK293T	bortezomib 30min, 500nM	1	1	1013.53								Bortez/Cont=	>5	po		Cont/Cont=	nd	nd	>5	=Avg Bort/Cont (10min+wash, 500 nM)
HEK293T	bortezomib 30min, 500nM	2	1	1017.53								Bortez/Cont=	>5	>5		Cont/Cont=	nd	nd	>5	=Avg Bort/Cont (10min+wash, 500 nM)
HEK293T	bortezomib 30min, 500nM	1	1	1025.58								Bortez/Cont=	>5	>5		Cont/Cont=	nd	nd	>5	=Avg Bort/Cont (10min+wash, 500 nM)
HEK293T	bortezomib 30min, 500nM	1	1	1030.51								Bortez/Cont=	>5	>5		Cont/Cont=	nd	nd	>5	=Avg Bort/Cont (10min+wash, 500 nM)
HEK293T	bortezomib 30min, 500nM	2	1	1031.55								Bortez/Cont=	>5	>5		Cont/Cont=	nd	nd	>5	=Avg Bort/Cont (10min+wash, 500 nM)
HEK293T	bortezomib 30min, 500nM	1	1	1036.52								Bortez/Cont=	>5	>5		Cont/Cont=	nd	nd	>5	=Avg Bort/Cont (10min+wash, 500 nM)
HEK293T	bortezomib 30min, 500nM	1	1	1038.53								Bortez/Cont=	>5	>5		Cont/Cont=	nd	nd	>5	=Avg Bort/Cont (10min+wash, 500 nM)
HEK293T	bortezomib 30min, 500nM	2	2	1058.6								Bortez/Cont=	>5	>5		Cont/Cont=	nd	nd	>5	=Avg Bort/Cont (10min+wash, 500 nM)
HEK293T	bortezomib 30min, 500nM	1	1	1072.59								Bortez/Cont=	>5	>5		Cont/Cont=	nd	nd	>5	=Avg Bort/Cont (10min+wash, 500 nM)
HEK293T	bortezomib 30min, 500nM	3	2	1089.64								Bortez/Cont=	>5	>5		Cont/Cont=	nd	nd	>5	=Avg Bort/Cont (10min+wash, 500 nM)
HEK293T	bortezomib 30min, 500nM	1	1	1093.55								Bortez/Cont=	>5	>5		Cont/Cont=	nd	nd	>5	=Avg Bort/Cont (10min+wash, 500 nM)
HEK293T	bortezomib 30min, 500nM	3	1	1109.63								Bortez/Cont=	>5	>5		Cont/Cont=	nd	nd	>5	=Avg Bort/Cont (10min+wash, 500 nM)
HEK293T	bortezomib 30min, 500nM	3	3	1118.58								Bortez/Cont=	>5	>5		Cont/Cont=	nd	nd	>5	=Avg Bort/Cont (10min+wash, 500 nM)
HEK293T	bortezomib 30min, 500nM	3	1	1126.65								Bortez/Cont=	>5	>5		Cont/Cont=	nd	nd	>5	=Avg Bort/Cont (10min+wash, 500 nM)
HEK293T	bortezomib 30min, 500nM	2	1	1126.68								Bortez/Cont=	>5	>5		Cont/Cont=	nd	nd	>5	=Avg Bort/Cont (10min+wash, 500 nM)
HEK293T	bortezomib 30min, 500nM	1	1	1139.5								Bortez/Cont=	>5	>5		Cont/Cont=	nd	nd	>5	=Avg Bort/Cont (10min+wash, 500 nM)
HEK293T	bortezomib 30min, 500nM	3	1	1143.61								Bortez/Cont=	>5	>5		Cont/Cont=	nd	nd	>5	=Avg Bort/Cont (10min+wash, 500 nM)
HEK293T	bortezomib 30min, 500nM	3	1	1157.73								Bortez/Cont=	>5	>5		Cont/Cont=	nd	nd	>5	=Avg Bort/Cont (10min+wash, 500 nM)
HEK293T	bortezomib 30min, 500nM	1	1	1159.67								Bortez/Cont=	>5	>5		Cont/Cont=	nd	nd	>5	=Avg Bort/Cont (10min+wash, 500 nM)
HEK293T	bortezomib 30min, 500nM	2	1	1171.55								Bortez/Cont=	>5	>5		Cont/Cont=	nd	nd	>5	=Avg Bort/Cont (10min+wash, 500 nM)
HEK293T	bortezomib 30min, 500nM	3	2	1186.66								Bortez/Cont=	>5	>5		Cont/Cont=	nd	nd	>5	=Avg Bort/Cont (10min+wash, 500 nM)
HEK293T	bortezomib 30min, 500nM	3	1	1232.63								Bortez/Cont=	>5	>5		Cont/Cont=	nd	nd	>5	=Avg Bort/Cont (10min+wash, 500 nM)
HEK293T	bortezomib 30min, 500nM	2	1	1237.65								Bortez/Cont=	>5	>5		Cont/Cont=	nd	nd	>5	=Avg Bort/Cont (10min+wash, 500 nM)
HEK293T	bortezomib 30min, 500nM	2	1	1252.68								Bortez/Cont=	>5	>5		Cont/Cont=	nd	nd	>5	=Avg Bort/Cont (10min+wash, 500 nM)
HEK293T	bortezomib 30min, 500nM	3	1	1254.67								Bortez/Cont=	>5	>5		Cont/Cont=	nd	nd	>5	=Avg Bort/Cont (10min+wash, 500 nM)
HEK293T	bortezomib 30min, 500nM	2	3	1269.72								Bortez/Cont=	>5	>5		Cont/Cont=	nd	nd	>5	=Avg Bort/Cont (10min+wash, 500 nM)
HEK293T	bortezomib 30min, 500nM	3	3	1269.72								Bortez/Cont=	>5	>5		Cont/Cont=	nd	nd	>5	=Avg Bort/Cont (10min+wash, 500 nM)
HEK293T	bortezomib 30min, 500nM	2	1	1272.63								Bortez/Cont=	>5	>5		Cont/Cont=	nd	nd	>5	=Avg Bort/Cont (10min+wash, 500 nM)
HEK293T	bortezomib 30min, 500nM	3	3	1276.44								Bortez/Cont=	>5	>5		Cont/Cont=	nd	nd	>5	=Avg Bort/Cont (10min+wash, 500 nM)
HEK293T	bortezomib 30min, 500nM	3	1	1276.69								Bortez/Cont=	>5	>5		Cont/Cont=	nd	nd	>5	=Avg Bort/Cont (10min+wash, 500 nM)
HEK293T	bortezomib 30min, 500nM	2	2	1329.66								Bortez/Cont=	>5	>5		Cont/Cont=	nd	nd	>5	=Avg Bort/Cont (10min+wash, 500 nM)
HEK293T	bortezomib 30min, 500nM	3	2	1337.73								Bortez/Cont=	>5	>5		Cont/Cont=	nd	nd	>5	=Avg Bort/Cont (10min+wash, 500 nM)
HEK293T	bortezomib 30min, 500nM	4	4	1346.1								Bortez/Cont=	>5	>5		Cont/Cont=	nd	nd	>5	=Avg Bort/Cont (10min+wash, 500 nM)
HEK293T	bortezomib 30min, 500nM	2	2	1366.76								Bortez/Cont=	>5	>5		Cont/Cont=	nd	nd	>5	=Avg Bort/Cont (10min+wash, 500 nM)
HEK293T	bortezomib 30min, 500nM	2	2	1370.71								Bortez/Cont=	>5	>5		Cont/Cont=	nd	nd	>5	=Avg Bort/Cont (10min+wash, 500 nM)
HEK293T	bortezomib 30min, 500nM	2	2	1381.78								Bortez/Cont=	>5	>5		Cont/Cont=	nd	nd	>5	=Avg Bort/Cont (10min+wash, 500 nM)
HEK293T	bortezomib 30min, 500nM	2	1	1384.79								Bortez/Cont=	>5	>5		Cont/Cont=	nd	nd	>5	=Avg Bort/Cont (10min+wash, 500 nM)
HEK293T	bortezomib 30min, 500nM	2	1	1392.8								Bortez/Cont=	>5	>5		Cont/Cont=	nd	nd	>5	=Avg Bort/Cont (10min+wash, 500 nM)
HEK293T	bortezomib 30min, 500nM	2	1	1393.69								Bortez/Cont=	>5	>5		Cont/Cont=	nd	nd	>5	=Avg Bort/Cont (10min+wash, 500 nM)
HEK293T	bortezomib 30min, 500nM	3	1	1394.74								Bortez/Cont=	>5	>5		Cont/Cont=	nd	nd	>5	=Avg Bort/Cont (10min+wash, 500 nM)
HEK293T	bortezomib 30min, 500nM	3	1	1398.71								Bortez/Cont=	>5	>5		Cont/Cont=	nd	nd	>5	=Avg Bort/Cont (10min+wash, 500 nM)
HEK293T	bortezomib 30min, 500nM	2	1	1407.81								Bortez/Cont=	>5	>5		Cont/Cont=	nd	nd	>5	=Avg Bort/Cont (10min+wash, 500 nM)
HEK293T	bortezomib 30min, 500nM	2	2	1414.77								Bortez/Cont=	>5	>5		Cont/Cont=	nd	nd	>5	=Avg Bort/Cont (10min+wash, 500 nM)
HEK293T	bortezomib 30min, 500nM	3	2	1452.71								Bortez/Cont=	>5	>5		Cont/Cont=	nd	nd	>5	=Avg Bort/Cont (10min+wash, 500 nM)
HEK293T	bortezomib 30min, 500nM	3	3	1458.76								Bortez/Cont=	>5	>5		Cont/Cont=	nd	nd	>5	=Avg Bort/Cont (10min+wash, 500 nM)
HEK293T	bortezomib 30min, 500nM	2	1	1476.75								Bortez/Cont=	>5	>5		Cont/Cont=	nd	nd	>5	=Avg Bort/Cont (10min+wash, 500 nM)
HEK293T	bortezomib 30min, 500nM	2	1	1489.84								Bortez/Cont=	>5	>5		Cont/Cont=	nd	nd	>5	=Avg Bort/Cont (10min+wash, 500 nM)
HEK293T	bortezomib 30min, 500nM	3	1	1497.75								Bortez/Cont=	>5	>5		Cont/Cont=	nd	nd	>5	=Avg Bort/Cont (10min+wash, 500 nM)
HEK293T	bortezomib 30min, 500nM	3	1	1520.82								Bortez/Cont=	>5	>5		Cont/Cont=	nd	nd	>5	=Avg Bort/Cont (10min+wash, 500 nM)
HEK293T	bortezomib 30min, 500nM	3	2	1523.81								Bortez/Cont=	>5	>5		Cont/Cont=	nd	nd	>5	=Avg Bort/Cont (10min+wash, 500 nM)
HEK293T	bortezomib 30min, 500nM	2	2	1524.71								Bortez/Cont=	>5	>5		Cont/Cont=	nd	nd	>5	=Avg Bort/Cont (10min+wash, 500 nM)
HEK293T	bortezomib 30min, 500nM	4	1	1536.9								Bortez/Cont=	>5	>5		Cont/Cont=	nd	nd	>5	=Avg Bort/Cont (10min+wash, 500 nM)
HEK293T	bortezomib 30min, 500nM	3	3	1538.28								Bortez/Cont=	>5	>5		Cont/Cont=	nd	nd	>5	=Avg Bort/Cont (10min+wash, 500 nM)
HEK293T	bortezomib 30min, 500nM	3	1	1547.82								Bortez/Cont=	>5	>5		Cont/Cont=	nd	nd	>5	=Avg Bort/Cont (10min+wash, 500 nM)
HEK293T	bortezomib 30min, 500nM	2	2	1554.82								Bortez/Cont=	>5	>5		Cont/Cont=	nd	nd	>5	=Avg Bort/Cont (10min+wash, 500 nM)
HEK293T	bortezomib 30min, 500nM	2	1	1554.84								Bortez/Cont=	>5	>5		Cont/Cont=	nd	nd	>5	=Avg Bort/Cont (10min+wash, 500 nM)
HEK293T	bortezomib 30min, 500nM	2	2	1572.85								Bortez/Cont=	>5	>5		Cont/Cont=	nd	nd	>5	=Avg Bort/Cont (10min+wash, 500 nM)
HEK293T	bortezomib 30min, 500nM	4	4	1584.79								Bortez/Cont=	>5	>5		Cont/Cont=	nd	nd	>5	=Avg Bort/Cont (10min+wash, 500 nM)
HEK293T	bortezomib 30min, 500nM	2	2	1584.84								Bortez/Cont=	>5	>5		Cont/Cont=	nd	nd	>5	=Avg Bort/Cont (10min+wash, 500 nM)
HEK293T	bortezomib 30min, 500nM	3	2	1584.89								Bortez/Cont=	>5	>5		Cont/Cont=	nd	nd	>5	=Avg Bort/Cont (10min+wash, 500 nM)
HEK293T	bortezomib 30min, 500nM	4	4	1585.82								Bortez/Cont=	>5	>5		Cont/Cont=	nd	nd	>5	=Avg Bort/Cont (10min+wash, 500 nM)
HEK293T	bortezomib 30min, 500nM	2	2	1589.84								Bortez/Cont=	>5	>5		Cont/Cont=	nd	nd	>5	=Avg Bort/Cont (10min+wash, 500 nM)
HEK293T	bortezomib 30min, 500nM	3	3	1590.81								Bortez/Cont=	>5	>5		Cont/Cont=	nd	nd	>5	=Avg Bort/Cont (10min+wash, 500 nM)
HEK293T	bortezomib 30min, 500nM	3	1	1591.88								Bortez/Cont=	>5	>5		Cont/Cont=	nd	nd	>5	=Avg Bort/Cont (10min+wash, 500 nM)
HEK293T	bortezomib 30min, 500nM	2	2	1608.86								Bortez/Cont=	>5	>5		Cont/Cont=	nd	nd	>5	=Avg Bort/Cont (10min+wash, 500 nM)
HEK293T	bortezomib 30min, 500nM	2	1	1615.83								Bortez/Cont=	>5	>5		Cont/Cont=	nd	nd	>5	=Avg Bort/Cont (10min+wash, 500 nM)
HEK293T	bortezomib 30min, 500nM	4	3	1652.85								Bortez/Cont=	>5	>5		Cont/Cont=	nd	nd	>5	=Avg Bort/Cont (10min+wash, 500 nM)
HEK293T	bortezomib 30min, 500nM	3	2	1652.88								Bortez/Cont=	>5	>5		Cont/Cont=	nd	nd	>5	=Avg Bort/Cont (10min+wash, 500 nM)
HEK293T	bortezomib 30min, 500nM	2	2	1680.88								Bortez/Cont=	>5	>5		Cont/Cont=	nd	nd	>5	=Avg Bort/Cont (10min+wash, 500 nM)
HEK293T	bortezomib 30min, 500nM	3	2	1680.89								Bortez/Cont=	>5	>5		Cont/Cont=	nd	nd	>5	=Avg Bort/Cont (10min+wash, 500 nM)
HEK293T	bortezomib 30min, 500nM	4	4	1692.97								Bortez/Cont=	>5	>5		Cont/Cont=	nd	nd	>5	=Avg Bort/Cont (10min+wash, 500 nM)
HEK293T	bortezomib 30min, 500nM	3	2	1693.9								Bortez/Cont=	>5	>5		Cont/Cont=	nd	nd	>5	=Avg Bort/Cont (10min+wash, 500 nM)
HEK293T	bortezomib 30min, 500nM	2	1	1694.97								Bortez/Cont=	>5	>5		Cont/Cont=	nd	nd	>5	=Avg Bort/Cont (10min+wash, 500 nM)
HEK293T	bortezomib 30min, 500nM	2	2	1716.93								Bortez/Cont=	>5	>5		Cont/Cont=	nd	nd	>5	=Avg Bort/Cont (10min+wash, 500 nM)
HEK293T	bortezomib 30min, 500nM	4	1	1717.9								Bortez/Cont=	>5	>5		Cont/Cont=	nd	nd	>5	=Avg Bort/Cont (10min+wash, 500 nM)
HEK293T	bortezomib 30min, 500nM	4	4	1718.95								Bortez/Cont=	>5	>5		Cont/Cont=	nd	nd	>5	=Avg Bort/Cont (10min+wash, 500 nM)
HEK293T	bortezomib 30min, 500nM	3	2	1722.93								Bortez/Cont=	>5	>5		Cont/Cont=	nd	nd	>5	=Avg Bort/Cont (10min+wash, 500 nM)
HEK293T	bortezomib 30min, 500nM	2	1	1728.79								Bortez/Cont=	>5	>5		Cont/Cont=	nd	nd	>5	=Avg Bort/Cont (10min+wash, 500 nM)
HEK293T	bortezomib 30min, 500nM	2	1	1739.93								Bortez/Cont=	>5	>5		Cont/Cont=	nd	nd	>5	=Avg Bort/Cont (10min+wash, 500 nM)
HEK293T	bortezomib 30min, 500nM	2	2	1751.01								Bortez/Cont=	>5	>5		Cont/Cont=	nd	nd	>5	=Avg Bort/Cont (10min+wash, 500 nM)
HEK293T	bortezomib 30min, 500nM	2	2	1754.99								Bortez/Cont=	>5	>5		Cont/Cont=	nd	nd	>5	=Avg Bort/Cont (10min+wash, 500 nM)
HEK293T	bortezomib 30min, 500nM	2	2	1756.93								Bortez/Cont=	>5	>5		Cont/Cont=	nd	nd	>5	=Avg Bort/Cont (10min+wash, 500 nM)
HEK293T	bortezomib 30min, 500nM	2	1	1757.96								Bortez/Cont=	>5	>5		Cont/Cont=	nd	nd	>5	=Avg Bort/Cont (10min+wash, 500 nM)
HEK293T	bortezomib 30min, 500nM	2	1	1758.93								Bortez/Cont=	>5	>5		Cont/Cont=	nd	nd	>5	=Avg Bort/Cont (10min+wash, 500 nM)
HEK293T	bortezomib 30min, 500nM	2	1	1763.95								Bortez/Cont=	>5	>5		Cont/Cont=	nd	nd	>5	=Avg Bort/Cont (10min+wash, 500 nM)
HEK293T	bortezomib 30min, 500nM	2	2	1772.91								Bortez/Cont=	>5	>5		Cont/Cont=	nd	nd	>5	=Avg Bort/Cont (10min+wash, 500 nM)
HEK293T	bortezomib 30min, 500nM	2	1	1774.92								Bortez/Cont=	>5	>5		Cont/Cont=	nd	nd	>5	=Avg Bort/Cont (10min+wash, 500 nM)
HEK293T	bortezomib 30min, 500nM	3	3	1782.97								Bortez/Cont=	>5	>5		Cont/Cont=	nd	nd	>5	=Avg Bort/Cont (10min+wash, 500 nM)
HEK293T	bortezomib 30min, 500nM	2	2	1796.9								Bortez/Cont=	>5	>5		Cont/Cont=	nd	nd	>5	=Avg Bort/Cont (10min+wash, 500 nM)
HEK293T	bortezomib 30min, 500nM	2	1	1806.04								Bortez/Cont=	>5	>5		Cont/Cont=	nd	nd	>5	=Avg Bort/Cont (10min+wash, 500 nM)
HEK293T	bortezomib 30min, 500nM	3	3	1831.77								Bortez/Cont=	>5	>5		Cont/Cont=	nd	nd	>5	=Avg Bort/Cont (10min+wash, 500 nM)
HEK293T	bortezomib 30min, 500nM	3	1	1836.06								Bortez/Cont=	>5	>5		Cont/Cont=	nd	nd	>5	=Avg Bort/Cont (10min+wash, 500 nM)
HEK293T	bortezomib 30min, 500nM	3	3	1853.14								Bortez/Cont=	>5	>5		Cont/Cont=	nd	nd	>5	=Avg Bort/Cont (10min+wash, 500 nM)
HEK293T	bortezomib 30min, 500nM	4	3	1869.07								Bortez/Cont=	>5	>5		Cont/Cont=	nd	nd	>5	=Avg Bort/Cont (10min+wash, 500 nM)
HEK293T	bortezomib 30min, 500nM	4	2	1885.97								Bortez/Cont=	>5	>5		Cont/Cont=	nd	nd	>5	=Avg Bort/Cont (10min+wash, 500 nM)
HEK293T	bortezomib 30min, 500nM	3	2	1891.01								Bortez/Cont=	>5	>5		Cont/Cont=	nd	nd	>5	=Avg Bort/Cont (10min+wash, 500 nM)
HEK293T	bortezomib 30min, 500nM	4	1	1895.11								Bortez/Cont=	>5	>5		Cont/Cont=	nd	nd	>5	=Avg Bort/Cont (10min+wash, 500 nM)
HEK293T	bortezomib 30min, 500nM	3	1	1895.12								Bortez/Cont=	>5	>5		Cont/Cont=	nd	nd	>5	=Avg Bort/Cont (10min+wash, 500 nM)
HEK293T	bortezomib 30min, 500nM	3	1	1914.06								Bortez/Cont=	>5	>5		Cont/Cont=	nd	nd	>5	=Avg Bort/Cont (10min+wash, 500 nM)
HEK293T	bortezomib 30min, 500nM	4	4	1914.15								Bortez/Cont=	>5	>5		Cont/Cont=	nd	nd	>5	=Avg Bort/Cont (10min+wash, 500 nM)
HEK293T	bortezomib 30min, 500nM	2	1	1920.9								Bortez/Cont=	>5	>5		Cont/Cont=	nd	nd	>5	=Avg Bort/Cont (10min+wash, 500 nM)
HEK293T	bortezomib 30min, 500nM	2	1	1946.03								Bortez/Cont=	>5	>5		Cont/Cont=	nd	nd	>5	=Avg Bort/Cont (10min+wash, 500 nM)
HEK293T	bortezomib 30min, 500nM	3	2	1955.05								Bortez/Cont=	>5	>5		Cont/Cont=	nd	nd	>5	=Avg Bort/Cont (10min+wash, 500 nM)
HEK293T	bortezomib 30min, 500nM	2	2	1955.08								Bortez/Cont=	>5	>5		Cont/Cont=	nd	nd	>5	=Avg Bort/Cont (10min+wash, 500 nM)
HEK293T	bortezomib 30min, 500nM	2	2	1973.01								Bortez/Cont=	>5	>5		Cont/Cont=	nd	nd	>5	=Avg Bort/Cont (10min+wash, 500 nM)
HEK293T	bortezomib 30min, 500nM	3	1	2016.04								Bortez/Cont=	>5	>5		Cont/Cont=	nd	nd	>5	=Avg Bort/Cont (10min+wash, 500 nM)
HEK293T	bortezomib 30min, 500nM	2	1	2016.06								Bortez/Cont=	>5	>5		Cont/Cont=	nd	nd	>5	=Avg Bort/Cont (10min+wash, 500 nM)
HEK293T	bortezomib 30min, 500nM	2	2	2017								Bortez/Cont=	>5	>5		Cont/Cont=	nd	nd	>5	=Avg Bort/Cont (10min+wash, 500 nM)
HEK293T	bortezomib 30min, 500nM	3	2	2024								Bortez/Cont=	>5	>5		Cont/Cont=	nd	nd	>5	=Avg Bort/Cont (10min+wash, 500 nM)
HEK293T	bortezomib 30min, 500nM	2	1	2042.07								Bortez/Cont=	>5	>5		Cont/Cont=	nd	nd	>5	=Avg Bort/Cont (10min+wash, 500 nM)
HEK293T	bortezomib 30min, 500nM	4	1	2050.22								Bortez/Cont=	>5	>5		Cont/Cont=	nd	nd	>5	=Avg Bort/Cont (10min+wash, 500 nM)
HEK293T	bortezomib 30min, 500nM	3	2	2063.08								Bortez/Cont=	>5	>5		Cont/Cont=	nd	nd	>5	=Avg Bort/Cont (10min+wash, 500 nM)
HEK293T	bortezomib 30min, 500nM	3	3	2089.04								Bortez/Cont=	>5	>5		Cont/Cont=	nd	nd	>5	=Avg Bort/Cont (10min+wash, 500 nM)
HEK293T	bortezomib 30min, 500nM	2	1	2102.09								Bortez/Cont=	>5	>5		Cont/Cont=	nd	nd	>5	=Avg Bort/Cont (10min+wash, 500 nM)
HEK293T	bortezomib 30min, 500nM	3	1	2151.17								Bortez/Cont=	>5	>5		Cont/Cont=	nd	nd	>5	=Avg Bort/Cont (10min+wash, 500 nM)
HEK293T	bortezomib 30min, 500nM	4	2	2167.12								Bortez/Cont=	>5	>5		Cont/Cont=	nd	nd	>5	=Avg Bort/Cont (10min+wash, 500 nM)
HEK293T	bortezomib 30min, 500nM	3	3	2182.22								Bortez/Cont=	>5	>5		Cont/Cont=	nd	nd	>5	=Avg Bort/Cont (10min+wash, 500 nM)
HEK293T	bortezomib 30min, 500nM	2	2	2211.11								Bortez/Cont=	>5	>5		Cont/Cont=	nd	nd	>5	=Avg Bort/Cont (10min+wash, 500 nM)
HEK293T	bortezomib 30min, 500nM	3	3	2241.98								Bortez/Cont=	>5	>5		Cont/Cont=	nd	nd	>5	=Avg Bort/Cont (10min+wash, 500 nM)
HEK293T	bortezomib 30min, 500nM	2	1	2293.31								Bortez/Cont=	>5	>5		Cont/Cont=	nd	nd	>5	=Avg Bort/Cont (10min+wash, 500 nM)
HEK293T	bortezomib 30min, 500nM	3	1	2337.27								Bortez/Cont=	>5	>5		Cont/Cont=	nd	nd	>5	=Avg Bort/Cont (10min+wash, 500 nM)
HEK293T	bortezomib 30min, 500nM	4	2	2349.2								Bortez/Cont=	>5	>5		Cont/Cont=	nd	nd	>5	=Avg Bort/Cont (10min+wash, 500 nM)
HEK293T	bortezomib 30min, 500nM	3	1	2352.27								Bortez/Cont=	>5	>5		Cont/Cont=	nd	nd	>5	=Avg Bort/Cont (10min+wash, 500 nM)
HEK293T	bortezomib 30min, 500nM	3	3	2356.25								Bortez/Cont=	>5	>5		Cont/Cont=	nd	nd	>5	=Avg Bort/Cont (10min+wash, 500 nM)
HEK293T	bortezomib 30min, 500nM	3	1	2372.19								Bortez/Cont=	>5	>5		Cont/Cont=	nd	nd	>5	=Avg Bort/Cont (10min+wash, 500 nM)
HEK293T	bortezomib 30min, 500nM	3	3	2442.35								Bortez/Cont=	>5	>5		Cont/Cont=	nd	nd	>5	=Avg Bort/Cont (10min+wash, 500 nM)
HEK293T	bortezomib 30min, 500nM	4	1	2497.53								Bortez/Cont=	>5	>5		Cont/Cont=	nd	nd	>5	=Avg Bort/Cont (10min+wash, 500 nM)
HEK293T	bortezomib 30min, 500nM	4	1	2736.65								Bortez/Cont=	>5	>5		Cont/Cont=	nd	nd	>5	=Avg Bort/Cont (10min+wash, 500 nM)
HEK293T	bortezomib 30min, 500nM	3	3	2796.48								Bortez/Cont=	>5	>5		Cont/Cont=	nd	nd	>5	=Avg Bort/Cont (10min+wash, 500 nM)
HEK293T	bortezomib 30min, 500nM	3	1	2823.52								Bortez/Cont=	>5	>5		Cont/Cont=	nd	nd	>5	=Avg Bort/Cont (10min+wash, 500 nM)
HEK293T	bortezomib 30min, 500nM	3	2	3014.56								Bortez/Cont=	>5	>5		Cont/Cont=	nd	nd	>5	=Avg Bort/Cont (10min+wash, 500 nM)
HEK293T	bortezomib 30min, 500nM	3	3	3246.43								Bortez/Cont=	>5	>5		Cont/Cont=	nd	nd	>5	=Avg Bort/Cont (10min+wash, 500 nM)
HEK293T	bortezomib 30min, 500nM	4	2	3247.83								Bortez/Cont=	>5	>5		Cont/Cont=	nd	nd	>5	=Avg Bort/Cont (10min+wash, 500 nM)
HEK293T	bortezomib 16h, 5nM	1	1	773.398	773.375	Heterogeneous nuclear ribonucleoproteins A2/B1 (the motif GFGFVTF is also found in several other proteins!!!)	nucleus	r	GFGFVTF	d		Bortez/Cont=	1.93939	2.39394	1.51515	Cont/Cont=	1.0303	0.969697	1.94949	=Avg Bortez/Cont (16h, 5nM)
HEK293T	bortezomib 16h, 5nM	2	2	782.423	782.433	Nucleophosmin	nucleus	a	KFINYV	k		Bortez/Cont=	6.2963	5.92593	4.07407	Cont/Cont=	1.11111	0.888889	>5	=Avg Bort/Cont (16h, 5 nM)
HEK293T	bortezomib 16h, 5nM	2	2	797.482	797.465	26S protease regulatory subunit 4	nucleus	y	LGDGPKLV	r		Bortez/Cont=	1.24561	1	0.631579	Cont/Cont=	1.01754	0.982456	0.959064	=Avg Bort/Cont (16h, 5 nM)
HEK293T	bortezomib 16h, 5nM	2	2	820.424	820.433	Peptidylprolyl isomerase A	cytoplasm	f	ELFADKV	p		Bortez/Cont=	1.08621	0.836207	0.732759	Cont/Cont=	1.03448	0.965517	0.885057	=Avg Bort/Cont (16h, 5 nM)
HEK293T	bortezomib 16h, 5nM	2	2	825.51	825.496	Triosephosphate isomerase 1	cytoplasm	k	LDPKIAVA	a		Bortez/Cont=	1.63636	1.52727	1.09091	Cont/Cont=	0.872727	1.12727	1.41818	=Avg Bort/Cont (16h, 5 nM)
HEK293T	bortezomib 16h, 5nM	2	2	842.522	842.511	FK506 Binding Protein	cytoplasm	d	VELLKLE	*		Bortez/Cont=	>5	>5	>5	Cont/Cont=	nd	nd	>5	=Avg Bort/Cont (16h, 5 nM)
HEK293T	bortezomib 16h, 5nM	2	1	844.464	844.444	26S protease regulatory subunit 4	nucleus	h	IFQIHTS	r		Bortez/Cont=	0.972973	0.951351	0.735135	Cont/Cont=	0.972973	1.02703	0.886486	=Avg Bort/Cont (16h, 5 nM)
HEK293T	bortezomib 16h, 5nM	2	1	847.475	847.434	Splicing factor, arginine/serine-rich 1	cytoplasm	r	RGGPPFAF	e		Bortez/Cont=	0.661479	0.684825	0.575875	Cont/Cont=	1.0428	0.957198	0.640726	=Avg Bort/Cont (16h, 5 nM)
HEK293T	bortezomib 16h, 5nM	2	2	851.451	851.439	Splicing factor, arginine/serine-rich 2	nucleus	l	KVDNLTY	r		Bortez/Cont=	1.04464	0.857143	0.705357	Cont/Cont=	1.01786	0.982143	0.869048	=Avg Bort/Cont (16h, 5 nM)
HEK293T	bortezomib 16h, 5nM	2	1	853.473	853.466	Cytochrome c-1	mitochondria	a	VALHSAVSA	s		Bortez/Cont=	1.26316	1.15789	0.736842	Cont/Cont=	1.26316	0.736842	1.05263	=Avg Bort/Cont (16h, 5 nM)
HEK293T	bortezomib 16h, 5nM	2	1	855.506	855.518	splicing factor, arginine/serine-rich 4, 5, or 6	nucleus	(n/y)	RLIVENL	s		Bortez/Cont=	0.216216	0.324324	0.567568	Cont/Cont=	0.918919	1.08108	0.369369	=Avg Bort/Cont (16h, 5 nM)
HEK293T	bortezomib 16h, 5nM	2	1	855.526	855.518	splicing factor, arginine/serine-rich 4, 5, or 6	nucleus	(n/y)	RLIVENL	s		Bortez/Cont=	0.970874	0.825243	0.631068	Cont/Cont=	1.07767	0.92233	0.809061	=Avg Bort/Cont (16h, 5 nM)
HEK293T	bortezomib 16h, 5nM	2	2	856.459	856.465	Nucleophosmin	nucleus	k	GGSLPKVEA	k		Bortez/Cont=	>5	>5	>5	Cont/Cont=	nd	nd	>5	=Avg Bort/Cont (16h, 5 nM)
HEK293T	bortezomib 16h, 5nM	2	1	871.488	871.476	Splicing factor, arginine/serine-rich 1	cytoplasm	y	GAIRDIDL	k		Bortez/Cont=	1.14286	1.13265	1.18367	Cont/Cont=	1	1	1.15306	=Avg Bort/Cont (16h, 5 nM)
HEK293T	bortezomib 16h, 5nM	2	2	878.461	878.45	40S Ribosomal protein S21	cytoplasm	a	DGIVSKNF	*		Bortez/Cont=	1.23288	0.821918	0.493151	Cont/Cont=	1.0411	0.958904	0.849315	=Avg Bort/Cont (16h, 5 nM)
HEK293T	bortezomib 16h, 5nM	3	3	901.552	901.542	Eukaryotic translation initiation factor 5A	cytoplasm	a	AVAIKAMAK	*		Bortez/Cont=	0.747475	0.808081	0.707071	Cont/Cont=	0.737374	1.26263	0.754209	=Avg Bort/Cont (16h, 5 nM)
HEK293T	bortezomib 16h, 5nM	2	1	926.568	926.555	Vimentin	cytoplasm	r	SSVPGVRLL	q		Bortez/Cont=	1.78947	1.46917	0.827068	Cont/Cont=	1.15338	0.846617	1.3619	=Avg Bort/Cont (16h, 5 nM)
HEK293T	bortezomib 16h, 5nM	2	1	940.457	940.44	Plasminogen activator inhibitor 1 RNA-binding protein	nucleus	*m	PGHLQEGFG	c		Bortez/Cont=	1.93496	0.731707	1.42439	Cont/Cont=	0.97561	1.02439	1.36369	=Avg Bort/Cont (16h, 5 nM)
HEK293T	bortezomib 16h, 5nM	2	1	940.569	940.549	Splicing factor, arginine/serine-rich 7	nucleus	y	GPLRTVWI	a		Bortez/Cont=	0.865672	0.945274	0.776119	Cont/Cont=	1.16418	0.835821	0.862355	=Avg Bort/Cont (16h, 5 nM)
HEK293T	bortezomib 16h, 5nM	2	2	949.51	949.487	40S Ribosomal protein S21	cytoplasm	k	ADGIVSKNF	*		Bortez/Cont=	1.23232	1.26263	0.919192	Cont/Cont=	1.0202	0.979798	1.13805	=Avg Bort/Cont (16h, 5 nM)
HEK293T	bortezomib 16h, 5nM	2	1	965.519	965.508	Heat shock 10kDa protein 1 (chaperonin 10)	mitochondria	*m	Ac-AGQAFRKF	l		Bortez/Cont=	2.66667	3.33333	2.44444	Cont/Cont=	0.888889	1.11111	2.81481	=Avg Bort/Cont (16h, 5 nM)
HEK293T	bortezomib 16h, 5nM	3	1	969.552	969.572	Vimentin	cytoplasm	l	RSSVPGVRL	l		Bortez/Cont=	1.28485	1.10303	0.787879	Cont/Cont=	0.836364	1.16364	1.05859	=Avg Bort/Cont (16h, 5 nM)
HEK293T	bortezomib 16h, 5nM	2	1	997.552	997.523	26S protease regulatory subunit 4	nucleus	e	HAPSIVFID	e		Bortez/Cont=	1.41176	1.17647	0.588235	Cont/Cont=	1.05882	0.941176	1.05882	=Avg Bort/Cont (16h, 5 nM)
HEK293T	bortezomib 16h, 5nM	2	1	1004.51	1004.53	Histone H2B	nucleus	f	VNDIFERI	i		Bortez/Cont=	>5	>5	>5	Cont/Cont=	nd	nd	>5	=Avg Bort/Cont (16h, 5 nM)
HEK293T	bortezomib 16h, 5nM	2	1	1004.55	1004.53	Histone H2B	nucleus	f	VNDIFERI	i		Bortez/Cont=	6.75	6.75	3.75	Cont/Cont=	1	1	>5	=Avg Bort/Cont (16h, 5 nM)
HEK293T	bortezomib 16h, 5nM	2	1	1011.63	1011.63	Protein DJ-1 ( Parkinson disease protein 7)	nucleus	*m	Ac-ASKRALVIL	a		Bortez/Cont=	0.533333	0.533333	0.6	Cont/Cont=	0.933333	1.06667	0.555556	=Avg Bort/Cont (16h, 5 nM)
HEK293T	bortezomib 16h, 5nM	2	1	1011.67	1011.63	Protein DJ-1 ( Parkinson disease protein 7)	nucleus	*m	Ac-ASKRALVIL	a		Bortez/Cont=	0.865979	0.824742	0.680412	Cont/Cont=	0.989691	1.01031	0.790378	=Avg Bort/Cont (16h, 5 nM)
HEK293T	bortezomib 16h, 5nM	2	2	1035.57	1035.56	26S protease regulatory subunit 4	nucleus	v	VGSELIQKY	l		Bortez/Cont=	1.44231	0.923077	0.75	Cont/Cont=	1.11538	0.884615	1.03846	=Avg Bort/Cont (16h, 5 nM)
HEK293T	bortezomib 16h, 5nM	2	2	1039.57	1039.55	Peptidylprolyl isomerase A	cytoplasm	l	KHTGPGILSM	a		Bortez/Cont=	0.967742	0.709677	0.645161	Cont/Cont=	1.00645	0.993548	0.774194	=Avg Bort/Cont (16h, 5 nM)
HEK293T	bortezomib 16h, 5nM	2	1	1050.56	1050.54	Peptidylprolyl isomerase A	cytoplasm	*m	VNPTVFFDI	a		Bortez/Cont=	0.860927	0.728477	0.529801	Cont/Cont=	0.966887	1.03311	0.706402	=Avg Bort/Cont (16h, 5 nM)
HEK293T	bortezomib 16h, 5nM	2	1	1054.61	1054.6	Peroxiredoxin 5	mitochondria	c	SLAPNIISQL	*		Bortez/Cont=	0.941176	0.647059	0.529412	Cont/Cont=	1	1	0.705882	=Avg Bort/Cont (16h, 5 nM)
HEK293T	bortezomib 16h, 5nM	2	1	1054.63	1054.6	Peroxiredoxin 5	mitochondria	c	SLAPNIISQL	*		Bortez/Cont=	0.666667	0.761905	0.714286	Cont/Cont=	1.14286	0.857143	0.714286	=Avg Bort/Cont (16h, 5 nM)
HEK293T	bortezomib 16h, 5nM	3	3	1077.59	1077.58	40S Ribosomal protein S21	cytoplasm	a	KADGIVSKNF	*		Bortez/Cont=	1.28079	1.21182	0.896552	Cont/Cont=	1.01478	0.985222	1.12972	=Avg Bort/Cont (16h, 5 nM)
HEK293T	bortezomib 16h, 5nM	2	3	1077.6	1077.58	40S Ribosomal protein S21	cytoplasm	a	KADGIVSKNF	*		Bortez/Cont=	1.41436	1.30387	0.751381	Cont/Cont=	1.07182	0.928177	1.15654	=Avg Bort/Cont (16h, 5 nM)
HEK293T	bortezomib 16h, 5nM	2	1	1078.62	1078.59	Heat shock 10kDa protein 1 (chaperonin 10)	mitochondria	*m	Ac-AGQAFRKFL	p		Bortez/Cont=	1.29412	1.41176	0.988235	Cont/Cont=	0.988235	1.01176	1.23137	=Avg Bort/Cont (16h, 5 nM)
HEK293T	bortezomib 16h, 5nM	2	1	1078.62	1078.59	Heat shock 10kDa protein 1 (chaperonin 10)	mitochondria	*m	Ac-AGQAFRKFL	p		Bortez/Cont=	1.15789	1.26316	0.789474	Cont/Cont=	1.05263	0.947368	1.07018	=Avg Bort/Cont (16h, 5 nM)
HEK293T	bortezomib 16h, 5nM	3	1	1082.65	1082.66	Vimentin	cytoplasm	l	RSSVPGVRLL	q		Bortez/Cont=	1.79487	1.4359	0.820513	Cont/Cont=	1.02564	0.974359	1.35043	=Avg Bort/Cont (16h, 5 nM)
HEK293T	bortezomib 16h, 5nM	2	1	1082.69	1082.67	Protein DJ-1 ( Parkinson disease protein 7)	nucleus	*m	Ac-ASKRALVILA	k		Bortez/Cont=	0.64	0.72	0.72	Cont/Cont=	1.04	0.96	0.693333	=Avg Bort/Cont (16h, 5 nM)
HEK293T	bortezomib 16h, 5nM	2	1	1082.7	1082.67	Protein DJ-1 ( Parkinson disease protein 7)	nucleus	*m	Ac-ASKRALVILA	k		Bortez/Cont=	0.893617	0.744681	0.574468	Cont/Cont=	1.06383	0.93617	0.737589	=Avg Bort/Cont (16h, 5 nM)
HEK293T	bortezomib 16h, 5nM	2	1	1086.61	1086.59	Triosephosphate isomerase 1	cytoplasm	q	SLGELIGTLNA	a		Bortez/Cont=	2.18182	1.92727	1.2	Cont/Cont=	0.909091	1.09091	1.7697	=Avg Bort/Cont (16h, 5 nM)
HEK293T	bortezomib 16h, 5nM	4	2	1092.67	1092.68	Cytochrome c oxidase subunit 7c	mitochondria	l	VVRHQLLKT	*		Bortez/Cont=	1.23579	1.26545	0.879881	Cont/Cont=	0.90954	1.09046	1.12704	=Avg Bort/Cont (16h, 5 nM)
HEK293T	bortezomib 16h, 5nM	2	2	1092.67	1092.68	Cytochrome c oxidase subunit 7c	mitochondria	l	VVRHQLLKT	*		Bortez/Cont=	1.45977	1.25287	1.03448	Cont/Cont=	0.988506	1.01149	1.24904	=Avg Bort/Cont (16h, 5 nM)
HEK293T	bortezomib 16h, 5nM	3	2	1092.69	1092.68	Cytochrome c oxidase subunit 7c	mitochondria	l	VVRHQLLKT	*		Bortez/Cont=	1.40127	1.0828	0.700637	Cont/Cont=	0.89172	1.10828	1.06157	=Avg Bort/Cont (16h, 5 nM)
HEK293T	bortezomib 16h, 5nM	2	2	1093.57	1093.53	Heat shock 10kDa protein 1 (chaperonin 10)	mitochondria	r	DGDILGKYVD	*		Bortez/Cont=	3.57143	3.33333	2.61905	Cont/Cont=	0.952381	1.04762	3.1746	=Avg Bort/Cont (16h, 5 nM)
HEK293T	bortezomib 16h, 5nM	3	3	1113.6	1113.6	Nucleophosmin	nucleus	i	EKGGSLPKVEA	k		Bortez/Cont=	>5	>5	>5	Cont/Cont=	nd	nd	>5	=Avg Bort/Cont (16h, 5 nM)
HEK293T	bortezomib 16h, 5nM	2	2	1138.65	1138.63	Triosephosphate isomerase 1	cytoplasm	k	LDPKIAVAAQN	c		Bortez/Cont=	2	1.008	0.88	Cont/Cont=	0.88	1.12	1.296	=Avg Bort/Cont (16h, 5 nM)
HEK293T	bortezomib 16h, 5nM	2	2	1144.63	1144.61	Triosephosphate isomerase 1	cytoplasm	l	KPEFVDIINA	k		Bortez/Cont=	3.79412	3.85294	2.73529	Cont/Cont=	1.26471	0.735294	3.46078	=Avg Bort/Cont (16h, 5 nM)
HEK293T	bortezomib 16h, 5nM	3	3	1148.59	1148.62	40S Ribosomal protein S21	cytoplasm	l	AKADGIVSKNF	*		Bortez/Cont=	0.773333	0.826667	0.48	Cont/Cont=	1.09333	0.906667	0.693333	=Avg Bort/Cont (16h, 5 nM)
HEK293T	bortezomib 16h, 5nM	3	3	1148.62	1148.62	40S Ribosomal protein S21	cytoplasm	l	AKADGIVSKNF	*		Bortez/Cont=	0.990826	0.917431	0.807339	Cont/Cont=	0.93578	1.06422	0.905199	=Avg Bort/Cont (16h, 5 nM)
HEK293T	bortezomib 16h, 5nM	2	3	1148.64	1148.62	40S Ribosomal protein S21	cytoplasm	l	AKADGIVSKNF	*		Bortez/Cont=	1.19635	0.958904	0.767123	Cont/Cont=	1.0137	0.986301	0.974125	=Avg Bort/Cont (16h, 5 nM)
HEK293T	bortezomib 16h, 5nM	3	2	1164.63	1164.61	Splicing factor, arginine/serine-rich 1	cytoplasm	h	EGETAYIRVK	v		Bortez/Cont=	2	1.875	1.5	Cont/Cont=	1.125	0.875	1.79167	=Avg Bort/Cont (16h, 5 nM)
HEK293T	bortezomib 16h, 5nM	2	2	1189.66	1189.64	Heat shock 10kDa protein 1 (chaperonin 10)	mitochondria	s	AAETVTKGGIML	p		Bortez/Cont=	1.36364	1.25	1.13636	Cont/Cont=	1.09091	0.909091	1.25	=Avg Bort/Cont (16h, 5 nM)
HEK293T	bortezomib 16h, 5nM	2	1	1199.7	1199.69	Heat shock 10kDa protein 1 (chaperonin 10)	mitochondria	f	LPLFDRVLVE	r		Bortez/Cont=	5	4	3	Cont/Cont=	1	1	4	=Avg Bort/Cont (16h, 5 nM)
HEK293T	bortezomib 16h, 5nM	2	1	1199.71	1199.69	Heat shock 10kDa protein 1 (chaperonin 10)	mitochondria	f	LPLFDRVLVE	r		Bortez/Cont=	>5	>5	>5	Cont/Cont=	nd	nd	>5	=Avg Bort/Cont (16h, 5 nM)
HEK293T	bortezomib 16h, 5nM	2	2	1203.64	1203.67	FK506 Binding Protein	cytoplasm	l	VFDVELLKLE	*		Bortez/Cont=	0.853333	0.666667	0.44	Cont/Cont=	1.06667	0.933333	0.653333	=Avg Bort/Cont (16h, 5 nM)
HEK293T	bortezomib 16h, 5nM	2	2	1203.7	1203.67	FK506 Binding Protein	cytoplasm	l	VFDVELLKLE	*		Bortez/Cont=	1.07527	0.795699	0.580645	Cont/Cont=	0.967742	1.03226	0.817204	=Avg Bort/Cont (16h, 5 nM)
HEK293T	bortezomib 16h, 5nM	3	1	1211.58	1211.57	RNA binding motif protein 3	nucleus	f	TNPEHASVAMR	a		Bortez/Cont=	1.25	0.75	0.625	Cont/Cont=	1	1	0.875	=Avg Bort/Cont (16h, 5 nM)
HEK293T	bortezomib 16h, 5nM	2	1	1212.68	1212.65	Histidine triad nucleotide-binding protein 1	cytoplasm	*m	Ac-ADEIAKAQVAR	p		Bortez/Cont=	1.07692	1.23077	0.846154	Cont/Cont=	1.07692	0.923077	1.05128	=Avg Bort/Cont (16h, 5 nM)
HEK293T	bortezomib 16h, 5nM	3	3	1218.62	1218.62	Peptidylprolyl isomerase A	cytoplasm	f	ADKVPKTAENF	r		Bortez/Cont=	1.22167	0.955665	0.738916	Cont/Cont=	1.06404	0.935961	0.972085	=Avg Bort/Cont (16h, 5 nM)
HEK293T	bortezomib 16h, 5nM	2	1	1242.71	1242.71	Heat shock 10kDa protein 1 (chaperonin 10)	mitochondria	l	PLFDRVLVER	s		Bortez/Cont=	1.42857	1.1619	0.933333	Cont/Cont=	1.08571	0.914286	1.1746	=Avg Bortez/Cont (16h, 5nM)
HEK293T	bortezomib 16h, 5nM	2	1	1245.66	1245.64	Peptidylprolyl isomerase A	cytoplasm	i	AVDGEPLGRVSF	e		Bortez/Cont=	0.972763	1.01167	1.00389	Cont/Cont=	0.996109	1.00389	0.996109	=Avg Bort/Cont (16h, 5 nM)
HEK293T	bortezomib 16h, 5nM	3	2	1249.62	1249.63	Heat shock 10kDa protein 1 (chaperonin 10)	mitochondria	f	RDGDILGKYVD	*		Bortez/Cont=	1.71429	2.09524	1.42857	Cont/Cont=	1.14286	0.857143	1.74603	=Avg Bort/Cont (16h, 5 nM)
HEK293T	bortezomib 16h, 5nM	3	2	1249.64	1249.63	Heat shock 10kDa protein 1 (chaperonin 10)	mitochondria	f	RDGDILGKYVD	*		Bortez/Cont=	1.71053	1.61842	1.23684	Cont/Cont=	1.06579	0.934211	1.52193	=Avg Bort/Cont (16h, 5 nM)
HEK293T	bortezomib 16h, 5nM	2	2	1249.67	1249.63	Heat shock 10kDa protein 1 (chaperonin 10)	mitochondria	f	RDGDILGKYVD	*		Bortez/Cont=	1.21687	1.45783	1.08434	Cont/Cont=	1.13253	0.86747	1.25301	=Avg Bort/Cont (16h, 5 nM)
HEK293T	bortezomib 16h, 5nM	3	2	1269.72	1269.71	Splicing factor, arginine/serine-rich 1	cytoplasm	y	GAIRDIDLKNR	r		Bortez/Cont=	0.872	1	0.88	Cont/Cont=	0.96	1.04	0.917333	=Avg Bort/Cont (16h, 5 nM)
HEK293T	bortezomib 16h, 5nM	4	2	1269.73	1269.71	Splicing factor, arginine/serine-rich 1	cytoplasm	y	GAIRDIDLKNR	r		Bortez/Cont=	0.837004	1.18943	0.951542	Cont/Cont=	0.898678	1.10132	0.992658	=Avg Bort/Cont (16h, 5 nM)
HEK293T	bortezomib 16h, 5nM	2	2	1272.64	1272.63	60S Ribosomal protein L31	cytoplasm	f	KNLQTVNVDEN	*		Bortez/Cont=	1.48538	1.1345	0.818713	Cont/Cont=	1.05263	0.947368	1.1462	=Avg Bort/Cont (16h, 5 nM)
HEK293T	bortezomib 16h, 5nM	2	1	1279.66	1279.63	Splicing factor, arginine/serine-rich 7	nucleus	a	RNPPGFAFVEF	e		Bortez/Cont=	0.965517	1.03448	0.804598	Cont/Cont=	1.03448	0.965517	0.934866	=Avg Bort/Cont (16h, 5 nM)
HEK293T	bortezomib 16h, 5nM	3	1	1280.68	1280.67	Tubulin beta 2 (could be other forms - can't tell I/L)	cytoplasm	*	MREIVHIQAGQ	c		Bortez/Cont=	2.34545	0.8	1.4	Cont/Cont=	1.10909	0.890909	1.51515	=Avg Bort/Cont (16h, 5 nM)
HEK293T	bortezomib 16h, 5nM	2	1	1280.69	1280.67	Tubulin beta 2 (could be other forms - can't tell I/L)	cytoplasm	*	MREIVHIQAGQ	c		Bortez/Cont=	2.53465	0.712871	1.32673	Cont/Cont=	1.18812	0.811881	1.52475	=Avg Bort/Cont (16h, 5 nM)
HEK293T	bortezomib 16h, 5nM	2	2	1287.69	1287.68	Eukaryotic translation elongation factor 1 beta	cytoplasm	*m	GFGDLKSPAGLQV	l		Bortez/Cont=	0.988235	0.917647	0.247059	Cont/Cont=	1.2	0.8	0.717647	=Avg Bort/Cont (16h, 5 nM)
HEK293T	bortezomib 16h, 5nM	2	2	1287.7	1287.68	Eukaryotic translation elongation factor 1 beta	cytoplasm	*m	GFGDLKSPAGLQV	l		Bortez/Cont=	1.0963	0.962963	0.681481	Cont/Cont=	1.21481	0.785185	0.91358	=Avg Bort/Cont (16h, 5 nM)
HEK293T	bortezomib 16h, 5nM	3	1	1296.68	1296.67	Tubulin beta 2 (could be other forms - can't tell I/L)	cytoplasm	*	MoxREIVHIQAGQ	c		Bortez/Cont=	1.95276	1.10236	1.02362	Cont/Cont=	0.96063	1.03937	1.35958	=Avg Bort/Cont (16h, 5 nM)
HEK293T	bortezomib 16h, 5nM	2	1	1308.74	1308.72	NADH dehydrogenase 1 alpha subcomplex, 8	mitochondria	*m	PGIVELPTLEEL	k		Bortez/Cont=	0.977376	0.678733	0.615385	Cont/Cont=	1.06787	0.932127	0.757164	=Avg Bort/Cont (16h, 5 nM)
HEK293T	bortezomib 16h, 5nM	3	3	1318.65	1318.64	Splicing factor, arginine/serine-rich 1	cytoplasm	t	KDIEDVFYKY	g		Bortez/Cont=	1.45161	0.709677	1.03226	Cont/Cont=	1.29032	0.709677	1.06452	=Avg Bort/Cont (16h, 5 nM)
HEK293T	bortezomib 16h, 5nM	2	1	1328.74	1328.71	40S Ribosomal protein S28	cytoplasm	*	Ac-MDTSRVQPIKL	a		Bortez/Cont=	1.19048	1.2381	1	Cont/Cont=	1	1	1.14286	=Avg Bort/Cont (16h, 5 nM)
HEK293T	bortezomib 16h, 5nM	2	1	1328.74	1328.71	40S Ribosomal protein S28	cytoplasm	*	Ac-MDTSRVQPIKL	a		Bortez/Cont=	1	0.882353	0.617647	Cont/Cont=	1.11765	0.882353	0.833333	=Avg Bort/Cont (16h, 5 nM)
HEK293T	bortezomib 16h, 5nM	2	1	1329.64	1329.6	Cathepsin C	lysosome	r	DPFNPFELTNH	a		Bortez/Cont=	0.973585	1.04906	0.928302	Cont/Cont=	1.0717	0.928302	0.983648	=Avg Bort/Cont (16h, 5 nM)
HEK293T	bortezomib 16h, 5nM	2	2	1342.73	1342.72	Macrophage migration inhibitory factor	cytoplasm	l	AQATGKPPQYIAV	h		Bortez/Cont=	3.2	3	2	Cont/Cont=	1.2	0.8	2.73333	=Avg Bort/Cont (16h, 5 nM)
HEK293T	bortezomib 16h, 5nM	3	2	1353.79	1353.76	CD99 antigen precursor	membrane	n	AEPAVQRTLLEK	*		Bortez/Cont=	1.35135	1.08108	0.864865	Cont/Cont=	0.891892	1.10811	1.0991	=Avg Bort/Cont (16h, 5 nM)
HEK293T	bortezomib 16h, 5nM	2	2	1356.71	1356.71	Cytochrome c oxidase subunit 5a	mitochondria	l	GISTPEELGLDKV	*		Bortez/Cont=	1.05263	po	0.842105	Cont/Cont=	0.736842	1.26316	0.947368	=Avg Bort/Cont (16h, 5 nM)
HEK293T	bortezomib 16h, 5nM	3	3	1372.71	1372.7	40S ribosomal protein S12	cytoplasm	v	DDNKKLGEWVGL	c		Bortez/Cont=	1.83673	0.857143	0.653061	Cont/Cont=	0.897959	1.10204	1.11565	=Avg Bort/Cont (16h, 5 nM)
HEK293T	bortezomib 16h, 5nM	4	3	1374.72	1374.73	Peptidylprolyl isomerase A	cytoplasm	f	ADKVPKTAENFR	a		Bortez/Cont=	0.816327	0.75102	0.685714	Cont/Cont=	1.03673	0.963265	0.75102	=Avg Bort/Cont (16h, 5 nM)
HEK293T	bortezomib 16h, 5nM	3	3	1374.73	1374.73	Peptidylprolyl isomerase A	cytoplasm	f	ADKVPKTAENFR	a		Bortez/Cont=	0.983051	0.813559	0.728814	Cont/Cont=	1.10169	0.898305	0.841808	=Avg Bort/Cont (16h, 5 nM)
HEK293T	bortezomib 16h, 5nM	2	2	1382.64	1382.64	Cytochrome c oxidase subunit 6b	mitochondria	*m	Ac-AEDMETKIKNY	k		Bortez/Cont=	1.23478	1.14783	0.921739	Cont/Cont=	1.02609	0.973913	1.10145	=Avg Bort/Cont (16h, 5 nM)
HEK293T	bortezomib 16h, 5nM	3	3	1384.77	1384.76	Nucleophosmin	nucleus	q	ASIEKGGSLPKVEA	k		Bortez/Cont=	>5	>5	>5	Cont/Cont=	nd	nd	>5	=Avg Bort/Cont (16h, 5 nM)
HEK293T	bortezomib 16h, 5nM	2	2	1397.82	1397.76	Phosphatidylethanolamine-binding protein 1	cytoplasm	*m	PVDLSKWSGPLSL	q		Bortez/Cont=	0.985294	1.08824	0.558824	Cont/Cont=	0.926471	1.07353	0.877451	=Avg Bortez/Cont (16h, 5nM)
HEK293T	bortezomib 16h, 5nM	2	1	1399.78	1399.75	40S Ribosomal protein S28	cytoplasm	*	Ac-MDTSRVQPIKLA	r		Bortez/Cont=	1.45977	1.12644	0.804598	Cont/Cont=	1.05747	0.942529	1.13027	=Avg Bort/Cont (16h, 5 nM)
HEK293T	bortezomib 16h, 5nM	2	2	1400.72	1400.77	Eukaryotic translation elongation factor 1 beta	cytoplasm	*m	GFGDLKSPAGLQVL	n		Bortez/Cont=	0.795181	0.481928	0.180723	Cont/Cont=	1.20482	0.795181	0.485944	=Avg Bort/Cont (16h, 5 nM)
HEK293T	bortezomib 16h, 5nM	2	2	1400.79	1400.77	Eukaryotic translation elongation factor 1 beta	cytoplasm	*m	GFGDLKSPAGLQVL	n		Bortez/Cont=	1.86047	0.930233	0.55814	Cont/Cont=	0.930233	1.06977	1.11628	=Avg Bort/Cont (16h, 5 nM)
HEK293T	bortezomib 16h, 5nM	3	2	1406.74	1406.73	Histidine triad nucleotide-binding protein 1	cytoplasm	c	AADLGLNKGYRMV	v		Bortez/Cont=	1.85185	1.80247	1.25926	Cont/Cont=	1.06173	0.938272	1.63786	=Avg Bort/Cont (16h, 5 nM)
HEK293T	bortezomib 16h, 5nM	3	1	1433.86	1433.84	Enhancer of rudimentary homolog	nucleus	*m	Ac-SHTILLVQPTKR	p		Bortez/Cont=	1.47368	1.78947	1.22105	Cont/Cont=	0.842105	1.15789	1.49474	=Avg Bort/Cont (16h, 5 nM)
HEK293T	bortezomib 16h, 5nM	3	2	1444.77	1444.76	Histidine triad nucleotide-binding protein 1	cytoplasm	k	EIPAKIIFEDDR	c		Bortez/Cont=	2.10526	1.57895	1.36842	Cont/Cont=	0.842105	1.15789	1.68421	=Avg Bort/Cont (16h, 5 nM)
HEK293T	bortezomib 16h, 5nM	3	3	1462.79	1462.75	Eukaryotic translation initiation factor 5A	cytoplasm	a	MTEEAAVAIKAMAK	*		Bortez/Cont=	0.902256	0.766917	0.669173	Cont/Cont=	0.887218	1.11278	0.779449	=Avg Bort/Cont (16h, 5 nM)
HEK293T	bortezomib 16h, 5nM	2	1	1473.79	1473.75	Peptidylprolyl isomerase A	cytoplasm	f	DIAVDGEPLGRVSF	e		Bortez/Cont=	0.909091	0.818182	0.727273	Cont/Cont=	1	1	0.818182	=Avg Bort/Cont (16h, 5 nM)
HEK293T	bortezomib 16h, 5nM	2	1	1473.78	1473.75	Heterogeneous nuclear ribonucleoprotein F	nucleus	*m	Ac-MLGPEGGEGFVVKL	r		Bortez/Cont=	0.945946	0.878378	0.743243	Cont/Cont=	1.08108	0.918919	0.855856	=Avg Bort/Cont (16h, 5 nM)
HEK293T	bortezomib 16h, 5nM	3	2	1476.81	1476.77	Triosephosphate isomerase 1	cytoplasm	c	APPTAYIDFARQK	l		Bortez/Cont=	1.4188	1.26496	0.957265	Cont/Cont=	1.05983	0.940171	1.21368	=Avg Bortez/Cont (16h, 5nM)
HEK293T	bortezomib 16h, 5nM	2	2	1478.85	1478.81	Prohibitin	mitochondria	*m	Ac-AAKVFESIGKFGLA	l		Bortez/Cont=	1.34802	1.21586	0.92511	Cont/Cont=	0.995595	1.00441	1.163	=Avg Bort/Cont (16h, 5 nM)
HEK293T	bortezomib 16h, 5nM	3	3	1485.78	1485.78	Heat shock 10kDa protein 1 (chaperonin 10)	mitochondria	v	GSGSKGKGGEIQPVSV	k		Bortez/Cont=	2.54545	3.27273	2.36364	Cont/Cont=	1.09091	0.909091	2.72727	=Avg Bort/Cont (16h, 5 nM)
HEK293T	bortezomib 16h, 5nM	2	1	1502.83	1502.76	60S acidic ribosomal protein P1	cytoplasm	a	AGVNVEPFWPGLFA	l		Bortez/Cont=	1.02362	1.25984	0.677165	Cont/Cont=	1.07087	0.929134	0.986877	=Avg Bortez/Cont (16h, 5nM)
HEK293T	bortezomib 16h, 5nM	3	1	1502.93	1502.86	Heat shock 10kDa protein 1 (chaperonin 10)	mitochondria	k	FLPLFDRVLVER	s		Bortez/Cont=	2.22222	2.44444	2	Cont/Cont=	1.11111	0.888889	2.22222	=Avg Bort/Cont (16h, 5 nM)
HEK293T	bortezomib 16h, 5nM	2	1	1524.8	1524.75	RNA binding motif protein 3	nucleus	*m	Ac-SSEEGKLFVGGLNF	n		Bortez/Cont=	1.04	1.09333	0.826667	Cont/Cont=	0.96	1.04	0.986667	=Avg Bort/Cont (16h, 5 nM)
HEK293T	bortezomib 16h, 5nM	2	2	1524.82	1524.86	Peroxiredoxin 5	mitochondria	m	APIKVGDAIPAVEVF	e		Bortez/Cont=	0.494624	0.344086	0.387097	Cont/Cont=	1.05376	0.946237	0.408602	=Avg Bort/Cont (16h, 5 nM)
HEK293T	bortezomib 16h, 5nM	2	2	1524.88	1524.86	Peroxiredoxin 5	mitochondria	m	APIKVGDAIPAVEVF	e		Bortez/Cont=	0.87619	0.666667	0.571429	Cont/Cont=	0.990476	1.00952	0.704762	=Avg Bort/Cont (16h, 5 nM)
HEK293T	bortezomib 16h, 5nM	3	2	1524.89	1524.9	Nucleophosmin	nucleus	l	GGFEITPPVVLRLK	c		Bortez/Cont=	>5	>5	>5	Cont/Cont=	nd	nd	>5	=Avg Bortez/Cont (16h, 5nM)
HEK293T	bortezomib 16h, 5nM	2	1	1550.84	1550.82	Heat shock 10kDa protein 1 (chaperonin 10)	mitochondria	*m	Ac-AGQAFRKFLPLFD	r		Bortez/Cont=	3.42857	4.11429	2.85714	Cont/Cont=	1.14286	0.857143	3.46667	=Avg Bort/Cont (16h, 5 nM)
HEK293T	bortezomib 16h, 5nM	2	1	1550.84	1550.82	Heat shock 10kDa protein 1 (chaperonin 10)	mitochondria	*m	Ac-AGQAFRKFLPLFD	r		Bortez/Cont=	3.93939	3.93939	3.27273	Cont/Cont=	1.0303	0.969697	3.71717	=Avg Bort/Cont (16h, 5 nM)
HEK293T	bortezomib 16h, 5nM	3	1	1555.88	1555.85	40S Ribosomal protein S28	cytoplasm	*	Ac-MDTSRVQPIKLAR	v		Bortez/Cont=	0.722222	1.07143	0.912698	Cont/Cont=	1.0873	0.912698	0.902116	=Avg Bort/Cont (16h, 5 nM)
HEK293T	bortezomib 16h, 5nM	4	3	1558.81	1558.85	Peptidylprolyl isomerase A	cytoplasm	f	ADKVPKTAENFRAL	s		Bortez/Cont=	1.25	1	0.75	Cont/Cont=	1	1	1	=Avg Bort/Cont (16h, 5 nM)
HEK293T	bortezomib 16h, 5nM	4	3	1558.86	1558.85	Peptidylprolyl isomerase A	cytoplasm	f	ADKVPKTAENFRAL	s		Bortez/Cont=	0.959184	1.12245	0.938776	Cont/Cont=	1.02041	0.979592	1.0068	=Avg Bort/Cont (16h, 5 nM)
HEK293T	bortezomib 16h, 5nM	3	3	1584.86	1584.85	Heat shock 10kDa protein 1 (chaperonin 10)	mitochondria	a	VGSGSKGKGGEIQPVSV	k		Bortez/Cont=	2.44444	2.41026	1.60684	Cont/Cont=	0.991453	1.00855	2.15385	=Avg Bort/Cont (16h, 5 nM)
HEK293T	bortezomib 16h, 5nM	2	1	1591.76	1591.71	MAPK-interacting and spindle-stabilizing protein-like	cytoplasm	v	PSGPSGAPPMPGGPHSY	h*		Bortez/Cont=	1.2	0.656	0.672	Cont/Cont=	1.088	0.912	0.842667	=Avg Bortez/Cont (16h, 5nM)
HEK293T	bortezomib 16h, 5nM	3	3	1611.81	1611.78	Cytochrome c oxidase subunit 6b	mitochondria	*m	Ac-AEDMETKIKNYKT	a		Bortez/Cont=	1.00741	0.896296	0.814815	Cont/Cont=	0.933333	1.06667	0.906173	=Avg Bort/Cont (16h, 5 nM)
HEK293T	bortezomib 16h, 5nM	2	1	1620.86	1620.81	Peptidylprolyl isomerase A	cytoplasm	f	FDIAVDGEPLGRVSF	e		Bortez/Cont=	0.933333	0.725926	0.607407	Cont/Cont=	1.0963	0.903704	0.755556	=Avg Bort/Cont (16h, 5 nM)
HEK293T	bortezomib 16h, 5nM	3	3	1620.76	1620.82	Eukaryotic translation initiation factor 5A	cytoplasm	l	SAMTEEAAVAIKAMAK	*		Bortez/Cont=	0.674699	0.578313	0.433735	Cont/Cont=	1.08434	0.915663	0.562249	=Avg Bort/Cont (16h, 5 nM)
HEK293T	bortezomib 16h, 5nM	3	3	1620.84	1620.82	Eukaryotic translation initiation factor 5A	cytoplasm	l	SAMTEEAAVAIKAMAK	*		Bortez/Cont=	1.10476	0.647619	0.457143	Cont/Cont=	1.02857	0.971429	0.736508	=Avg Bort/Cont (16h, 5 nM)
HEK293T	bortezomib 16h, 5nM	2	2	1630.82	1630.79	Coiled-coil domain-containing protein 97	???	*	Ac-MEAVATATAAKEPDKG	c		Bortez/Cont=	2.43796	1.21168	1.76642	Cont/Cont=	0.890511	1.10949	1.80535	=Avg Bort/Cont (16h, 5 nM)
HEK293T	bortezomib 16h, 5nM	2	1	1634.87	1634.83	Peptidylprolyl isomerase A	cytoplasm	i	AVDGEPLGRVSFELF	a		Bortez/Cont=	0.8125	0.75	0.65	Cont/Cont=	1	1	0.7375	=Avg Bort/Cont (16h, 5 nM)
HEK293T	bortezomib 16h, 5nM	3	3	1654.93	1654.91	Heat shock 10kDa protein 1 (chaperonin 10)	mitochondria	k	GGIMLPEKSQGKVLQA	t		Bortez/Cont=	>5	>5	>5	Cont/Cont=	nd	nd	>5	=Avg Bort/Cont (16h, 5 nM)
HEK293T	bortezomib 16h, 5nM	3	3	1655.91	1655.88	Heat shock 10kDa protein 1 (chaperonin 10)	mitochondria	v	AVGSGSKGKGGEIQPVSV	k		Bortez/Cont=	1.12782	1.65414	1.57895	Cont/Cont=	0.827068	1.17293	1.45363	=Avg Bort/Cont (16h, 5 nM)
HEK293T	bortezomib 16h, 5nM	4	4	1655.93	1655.92	60S acidic ribosomal protein P2	cytoplasm	l	AALGGNSSPSAKDIKKI	l		Bortez/Cont=	>5	>5	>5	Cont/Cont=	nd	nd	>5	=Avg Bortez/Cont (16h, 5nM)
HEK293T	bortezomib 16h, 5nM	2	2	1662.89	1662.93	Prohibitin	mitochondria	*m	Ac-AAKVFESIGKFGLALA	v		Bortez/Cont=	1.48276	1.2069	0.689655	Cont/Cont=	1.03448	0.965517	1.12644	=Avg Bort/Cont (16h, 5 nM)
HEK293T	bortezomib 16h, 5nM	2	2	1662.96	1662.93	Prohibitin	mitochondria	*m	Ac-AAKVFESIGKFGLALA	v		Bortez/Cont=	0.883117	0.831169	0.467532	Cont/Cont=	1.03896	0.961039	0.727273	=Avg Bort/Cont (16h, 5 nM)
HEK293T	bortezomib 16h, 5nM	2	2	1667.95	1667.91	Phosphatidylethanolamine-binding protein 1	cytoplasm	y	AGAAVDELGKVLTPTQV	k		Bortez/Cont=	1	0.933333	0.766667	Cont/Cont=	0.933333	1.06667	0.9	=Avg Bort/Cont (16h, 5 nM)
HEK293T	bortezomib 16h, 5nM	3	3	1668.92	1668.9	60S acidic ribosomal protein P2 polymorphism	cytoplasm	l	DGKNIEDVIAQGIGKL	a		Bortez/Cont=	2.72414	3.37931	1.96552	Cont/Cont=	1	1	2.68966	=Avg Bortez/Cont (16h, 5nM)
HEK293T	bortezomib 16h, 5nM	3	2	1677.96	1677.92	Macrophage migration inhibitory factor	cytoplasm	l	AQATGKPPQYIAVHVV	p		Bortez/Cont=	>5	>5	>5	Cont/Cont=	nd	nd	>5	=Avg Bortez/Cont (16h, 5nM)
HEK293T	bortezomib 16h, 5nM	2	2	1685.9	1685.92	Prefoldin subunit 1	cytoplasm	*m	Ac-AAPVDLELKKAFTEL	q		Bortez/Cont=	0.588235	0.705882	0.352941	Cont/Cont=	1.17647	0.823529	0.54902	=Avg Bort/Cont (16h, 5 nM)
HEK293T	bortezomib 16h, 5nM	2	2	1685.96	1685.92	Prefoldin subunit 1	cytoplasm	*m	Ac-AAPVDLELKKAFTEL	q		Bortez/Cont=	1.04	0.8	0.56	Cont/Cont=	1	1	0.8	=Avg Bort/Cont (16h, 5 nM)
HEK293T	bortezomib 16h, 5nM	3	3	1687.91	1687.89	Profilin 1	cytoplasm	y	KDSPSVWAAVPGKTFV	n		Bortez/Cont=	1.05036	0.892086	0.705036	Cont/Cont=	1.08633	0.913669	0.882494	=Avg Bort/Cont (16h, 5 nM)
HEK293T	bortezomib 16h, 5nM	3	1	1706.99	1706.93	Heat shock 10kDa protein 1 (chaperonin 10)	mitochondria	*m	Ac-AGQAFRKFLPLFDR	v		Bortez/Cont=	0.96	1.04	1.2	Cont/Cont=	1.04	0.96	1.06667	=Avg Bort/Cont (16h, 5 nM)
HEK293T	bortezomib 16h, 5nM	4	4	1712.93	1712.98	Triosephosphate isomerase 1	cytoplasm	t	KVIADNVKDWSKVVL	a		Bortez/Cont=	0.603774	0.45283	0.283019	Cont/Cont=	1.13208	0.867925	0.446541	=Avg Bort/Cont (16h, 5 nM)
HEK293T	bortezomib 16h, 5nM	4	4	1712.99	1712.98	Triosephosphate isomerase 1	cytoplasm	t	KVIADNVKDWSKVVL	a		Bortez/Cont=	1.11579	0.842105	0.736842	Cont/Cont=	0.947368	1.05263	0.898246	=Avg Bort/Cont (16h, 5 nM)
HEK293T	bortezomib 16h, 5nM	3	1	1728.79	1728.77	MAPK-interacting and spindle-stabilizing protein-like	cytoplasm	v	PSGPSGAPPMPGGPHSYH	*		Bortez/Cont=	1.74713	1.05747	1.21839	Cont/Cont=	1.21839	0.781609	1.341	=Avg Bort/Cont (16h, 5 nM)
HEK293T	bortezomib 16h, 5nM	2	1	1728.8	1728.77	MAPK-interacting and spindle-stabilizing protein-like	cytoplasm	v	PSGPSGAPPMPGGPHSYH	*		Bortez/Cont=	1.53846	1.07692	1.15385	Cont/Cont=	1.07692	0.923077	1.25641	=Avg Bort/Cont (16h, 5 nM)
HEK293T	bortezomib 16h, 5nM	3	1	1728.89	1728.77	MAPK-interacting and spindle-stabilizing protein-like	cytoplasm	v	PSGPSGAPPMPGGPHSYH	*		Bortez/Cont=	3.69231	2.61538	0.692308	Cont/Cont=	0.461538	1.53846	2.33333	=Avg Bort/Cont (16h, 5 nM)
HEK293T	bortezomib 16h, 5nM	3	2	1737.91	1737.88	Peroxiredoxin 1	cytoplasm	*m	Ac-SSGNAKIGHPAPNFKAT	a		Bortez/Cont=	1.07339	1.23853	1.09174	Cont/Cont=	0.954128	1.04587	1.13456	=Avg Bort/Cont (16h, 5 nM)
HEK293T	bortezomib 16h, 5nM	2	2	1761.92	1761.88	Protein QIL1	???	y	LVYDQELLGPSDKSQA	a		Bortez/Cont=	1.32653	0.938776	0.938776	Cont/Cont=	0.979592	1.02041	1.06803	=Avg Bort/Cont (16h, 5 nM)
HEK293T	bortezomib 16h, 5nM	2	1	1762.91	1762.84	Complement component 1 Q subcomponent-binding protein, mitochondrial	mitochondria	l	ADRGVDNTFADELVEL	s		Bortez/Cont=	1.0099	1.20792	1.18812	Cont/Cont=	0.831683	1.16832	1.13531	=Avg Bortez/Cont (16h, 5nM)
HEK293T	bortezomib 16h, 5nM	4	3	1763.93	1763.92	Peptidylprolyl isomerase A	cytoplasm	f	ELFADKVPKTAENFR	a		Bortez/Cont=	0.842912	0.735632	0.605364	Cont/Cont=	1.0728	0.927203	0.727969	=Avg Bort/Cont (16h, 5 nM)
HEK293T	bortezomib 16h, 5nM	3	2	1785.94	1785.91	60S acidic ribosomal protein P2	cytoplasm	v	GIEADDDRLNKVISEL	n		Bortez/Cont=	2.07407	2.44444	1.77778	Cont/Cont=	1.11111	0.888889	2.09877	=Avg Bort/Cont (16h, 5 nM)
HEK293T	bortezomib 16h, 5nM	2	2	1801.98	1801.94	Heat shock 70kDa protein 9B (mortalin-2)	mitochondria	y	ASEAIKGAVVGIDLGTTNS	c		Bortez/Cont=	1.76829	1.2439	1.57317	Cont/Cont=	0.926829	1.07317	1.52846	=Avg Bort/Cont (16h, 5 nM)
HEK293T	bortezomib 16h, 5nM	3	1	1806.03	1805.99	Heat shock 10kDa protein 1 (chaperonin 10)	mitochondria	*m	Ac-AGQAFRKFLPLFDRV	l		Bortez/Cont=	1.1	1.06	0.9	Cont/Cont=	1	1	1.02	=Avg Bort/Cont (16h, 5 nM)
HEK293T	bortezomib 16h, 5nM	3	1	1806.06	1805.99	Heat shock 10kDa protein 1 (chaperonin 10)	mitochondria	*m	Ac-AGQAFRKFLPLFDRV	l		Bortez/Cont=	0.621359	0.699029	0.640777	Cont/Cont=	1.08738	0.912621	0.653722	=Avg Bort/Cont (16h, 5 nM)
HEK293T	bortezomib 16h, 5nM	2	2	1814.96	1814.97	60S acidic ribosomal protein P1	cytoplasm	a	AGVNVEPFWPGLFAKAL	a		Bortez/Cont=	0.673077	0.653846	0.576923	Cont/Cont=	1.05769	0.942308	0.634615	=Avg Bort/Cont (16h, 5 nM)
HEK293T	bortezomib 16h, 5nM	2	2	1814.99	1814.97	60S acidic ribosomal protein P1	cytoplasm	a	AGVNVEPFWPGLFAKAL	a		Bortez/Cont=	1.23077	1.07692	0.461538	Cont/Cont=	0.923077	1.07692	0.923077	=Avg Bort/Cont (16h, 5 nM)
HEK293T	bortezomib 16h, 5nM	4	1	1856.04	1856.01	40S Ribosomal protein S28	cytoplasm	e	GDVLTLLESEREARRL	r		Bortez/Cont=	4	7	4.4	Cont/Cont=	1	1	>5	=Avg Bort/Cont (16h, 5 nM)
HEK293T	bortezomib 16h, 5nM	2	1	1862.99	1862.94	Peptidylprolyl isomerase A	cytoplasm	f	DIAVDGEPLGRVSFELF	a		Bortez/Cont=	0.80292	1.0219	0.656934	Cont/Cont=	1.05109	0.948905	0.827251	=Avg Bort/Cont (16h, 5 nM)
HEK293T	bortezomib 16h, 5nM	2	1	1882.98	1882.92	Nuclear transport factor 2	cytoplasm	*m	Ac-GDKPIWEQIGSSFIQH	y		Bortez/Cont=	1.30769	1.74359	1.07692	Cont/Cont=	0.923077	1.07692	1.37607	=Avg Bortez/Cont (16h, 5nM)
HEK293T	bortezomib 16h, 5nM	2	1	1898.93	1898.89	Histidine triad nucleotide-binding protein 1	cytoplasm	i	SVAEDDDESLLGHLMIVG	k		Bortez/Cont=	0.916667	0.833333	0.75	Cont/Cont=	1.16667	0.833333	0.833333	=Avg Bort/Cont (16h, 5 nM)
HEK293T	bortezomib 16h, 5nM	3	2	1899.97	1899.94	Peptidylprolyl isomerase A	cytoplasm	f	EDENFILKHTGPGILSM	a		Bortez/Cont=	0.98917	0.823105	0.555957	Cont/Cont=	1.04693	0.953069	0.78941	=Avg Bort/Cont (16h, 5 nM)
HEK293T	bortezomib 16h, 5nM	2	2	1906.01	1905.98	Eukaryotic translation elongation factor 1 beta	cytoplasm	*m	GFGDLKSPAGLQVLNDYL	a		Bortez/Cont=	0.625	0.569444	0.208333	Cont/Cont=	1.58333	0.416667	0.467593	=Avg Bort/Cont (16h, 5 nM)
HEK293T	bortezomib 16h, 5nM	2	1	1922.98	1922.92	40S Ribosomal protein S21	cytoplasm	*	Ac-MQNDAGEFVDLYVPRK	c		Bortez/Cont=	2.5	1	1	Cont/Cont=	1	1	1.5	=Avg Bort/Cont (16h, 5 nM)
HEK293T	bortezomib 16h, 5nM	2	1	1923	1922.92	40S Ribosomal protein S21	cytoplasm	*	Ac-MQNDAGEFVDLYVPRK	c		Bortez/Cont=	1.83333	1.33333	0.5	Cont/Cont=	1.33333	0.666667	1.22222	=Avg Bort/Cont (16h, 5 nM)
HEK293T	bortezomib 16h, 5nM	2	1	1923	1922.92	40S Ribosomal protein S21	cytoplasm	*	Ac-MQNDAGEFVDLYVPRK	c		Bortez/Cont=	1.84615	1.38462	0.553846	Cont/Cont=	1.38462	0.615385	1.26154	=Avg Bort/Cont (16h, 5 nM)
HEK293T	bortezomib 16h, 5nM	2	1	1938.97	1938.92	40S Ribosomal protein S21	cytoplasm	*	Ac-MoxQNDAGEFVDLYVPRK	c		Bortez/Cont=	2.14286	1.14286	0.914286	Cont/Cont=	1	1	1.4	=Avg Bort/Cont (16h, 5 nM)
HEK293T	bortezomib 16h, 5nM	3	3	1955.07	1955.07	Heat shock 10kDa protein 1 (chaperonin 10)	mitochondria	a	TVVAVGSGSKGKGGEIQPVSV	k		Bortez/Cont=	1.58333	1.41667	0.5	Cont/Cont=	1.08333	0.916667	1.16667	=Avg Bort/Cont (16h, 5 nM)
HEK293T	bortezomib 16h, 5nM	3	3	1955.09	1955.07	Heat shock 10kDa protein 1 (chaperonin 10)	mitochondria	a	TVVAVGSGSKGKGGEIQPVSV	k		Bortez/Cont=	1.56627	1.15663	0.722892	Cont/Cont=	1.08434	0.915663	1.14859	=Avg Bort/Cont (16h, 5 nM)
HEK293T	bortezomib 16h, 5nM	3	3	1968.96	1968.95	Phosphatidylethanolamine-binding protein 1	cytoplasm	a	EWDDYVPKLYEQLSGK	*		Bortez/Cont=	1.44928	0.811594	0.724638	Cont/Cont=	1.15942	0.84058	0.995169	=Avg Bort/Cont (16h, 5 nM)
HEK293T	bortezomib 16h, 5nM	4	2	1983.14	1983.13	40S Ribosomal protein S28	cytoplasm	*	Ac-MDTSRVQPIKLARVTKV	l		Bortez/Cont=	1.59596	1.45455	1.13131	Cont/Cont=	0.949495	1.05051	1.39394	=Avg Bortez/Cont (16h, 5nM)
HEK293T	bortezomib 16h, 5nM	3	1	2009.98	2009.98	Hematological and neurological expressed 1 protein	nucleus	*m	Ac-TTTTTFKGVDPNSRNSSR	d		Bortez/Cont=	1.01186	1.03557	0.916996	Cont/Cont=	0.948617	1.05138	0.988142	=Avg Bort/Cont (16h, 5 nM)
HEK293T	bortezomib 16h, 5nM	4	1	2012.14	2012.11	40S Ribosomal protein S28	cytoplasm	e	GDVLTLLESEREARRLR	*		Bortez/Cont=	1.75	2.55	1.6	Cont/Cont=	0.85	1.15	1.96667	=Avg Bort/Cont (16h, 5 nM)
HEK293T	bortezomib 16h, 5nM	5	1	2012.15	2012.11	40S Ribosomal protein S28	cytoplasm	e	GDVLTLLESEREARRLR	*		Bortez/Cont=	1.94737	2.73684	1.84211	Cont/Cont=	0.947368	1.05263	2.17544	=Avg Bort/Cont (16h, 5 nM)
HEK293T	bortezomib 16h, 5nM	4	1	2012.22	2012.11	40S Ribosomal protein S28	cytoplasm	e	GDVLTLLESEREARRLR	*		Bortez/Cont=	1.66667	1.80952	1.07143	Cont/Cont=	1.04762	0.952381	1.51587	=Avg Bort/Cont (16h, 5 nM)
HEK293T	bortezomib 16h, 5nM	5	1	2012.23	2012.11	40S Ribosomal protein S28	cytoplasm	e	GDVLTLLESEREARRLR	*		Bortez/Cont=	1.875	2.29167	2	Cont/Cont=	1.08333	0.916667	2.05556	=Avg Bort/Cont (16h, 5 nM)
HEK293T	bortezomib 16h, 5nM	3	2	2016	2016.01	Nucleophosmin	nucleus	m	TDQEAIQDLWQWRKSL	*		Bortez/Cont=	1.68831	1.11688	0.623377	Cont/Cont=	1.16883	0.831169	1.14286	=Avg Bort/Cont (16h, 5 nM)
HEK293T	bortezomib 16h, 5nM	3	1	2018.22	2018.15	Heat shock 10kDa protein 1 (chaperonin 10)	mitochondria	*m	Ac-AGQAFRKFLPLFDRVLV	e		Bortez/Cont=	0.495238	0.761905	0.714286	Cont/Cont=	1.04762	0.952381	0.657143	=Avg Bort/Cont (16h, 5 nM)
HEK293T	bortezomib 16h, 5nM	2	1	2071.04	2071.06	Proteasome maturation protein	nucleus	*	Ac-MNARGLGSELKDSIPVTEL	s		Bortez/Cont=	0.820513	1.02564	1.0641	Cont/Cont=	0.846154	1.15385	0.970085	=Avg Bortez/Cont (16h, 5nM)
HEK293T	bortezomib 16h, 5nM	3	2	2087.06	2087.04	60S acidic ribosomal protein P2	cytoplasm	i	LDSVGIEADDDRLNKVISE	l		Bortez/Cont=	1.95349	1.65116	1.23256	Cont/Cont=	0.837209	1.16279	1.6124	=Avg Bortez/Cont (16h, 5nM)
HEK293T	bortezomib 16h, 5nM	2	2	2087.08	2087.04	60S acidic ribosomal protein P2	cytoplasm	i	LDSVGIEADDDRLNKVISE	l		Bortez/Cont=	2.2619	1.40476	1.28571	Cont/Cont=	1	1	1.65079	=Avg Bortez/Cont (16h, 5nM)
HEK293T	bortezomib 16h, 5nM	2	1	2110.2	2110.12	Methylosome subunit pICln (AltName: Chloride channel, nucleotide sensitive 1A)	cytoplasm	*m	Ac-SFLKSFPPPGPAEGLLRQQ	p		Bortez/Cont=	1.45631	1.20388	0.582524	Cont/Cont=	0.932039	1.06796	1.08091	=Avg Bortez/Cont (16h, 5nM)
HEK293T	bortezomib 16h, 5nM	3	2	2131.17	2131.14	Macrophage migration inhibitory factor	cytoplasm	l	AQATGKPPQYIAVHVVPDQL	m		Bortez/Cont=	2.14286	2.35714	2	Cont/Cont=	0.928571	1.07143	2.16667	=Avg Bort/Cont (16h, 5 nM)
HEK293T	bortezomib 16h, 5nM	3	2	2131.21	2131.14	Macrophage migration inhibitory factor	cytoplasm	l	AQATGKPPQYIAVHVVPDQL	m		Bortez/Cont=	2.01481	2.19259	1.71852	Cont/Cont=	0.992593	1.00741	1.97531	=Avg Bort/Cont (16h, 5 nM)
HEK293T	bortezomib 16h, 5nM	3	1	2137.2	2137.16	Enhancer of rudimentary homolog	nucleus	*m	Ac-SHTILLVQPTKRPEGRTY	a		Bortez/Cont=	1.33649	1.35545	1.109	Cont/Cont=	1.07109	0.92891	1.26698	=Avg Bort/Cont (16h, 5 nM)
HEK293T	bortezomib 16h, 5nM	4	1	2137.26	2137.16	Enhancer of rudimentary homolog	nucleus	*m	Ac-SHTILLVQPTKRPEGRTY	a		Bortez/Cont=	1.18644	0.813559	1.22034	Cont/Cont=	1.15254	0.847458	1.07345	=Avg Bort/Cont (16h, 5 nM)
HEK293T	bortezomib 16h, 5nM	3	1	2137.28	2137.16	Enhancer of rudimentary homolog	nucleus	*m	Ac-SHTILLVQPTKRPEGRTY	a		Bortez/Cont=	0.96	1.12	0.84	Cont/Cont=	1.12	0.88	0.973333	=Avg Bort/Cont (16h, 5 nM)
HEK293T	bortezomib 16h, 5nM	3	1	2147.24	2147.19	Heat shock 10kDa protein 1 (chaperonin 10)	mitochondria	*m	Ac-AGQAFRKFLPLFDRVLVE	r		Bortez/Cont=	0.742268	0.969072	0.618557	Cont/Cont=	1.1134	0.886598	0.776632	=Avg Bort/Cont (16h, 5 nM)
HEK293T	bortezomib 16h, 5nM	3	2	2200.15	2200.12	60S acidic ribosomal protein P2	cytoplasm	i	LDSVGIEADDDRLNKVISEL	n		Bortez/Cont=	4.08	5.72	4	Cont/Cont=	1	1	4.6	=Avg Bort/Cont (16h, 5 nM)
HEK293T	bortezomib 16h, 5nM	2	1	2216.14	2216.08	Splicing factor, arginine/serine-rich 2	nucleus	*m	Ac-SYGRPPPDVEGMTSLKVDNL	t		Bortez/Cont=	0.97561	1.09756	0.853659	Cont/Cont=	0.97561	1.02439	0.97561	=Avg Bort/Cont (16h, 5 nM)
HEK293T	bortezomib 16h, 5nM	4	2	2229.18	2229.15	FK506 Binding Protein	cytoplasm	m	GVQVETISPGDGRTFPKRGQT	c		Bortez/Cont=	1.5533	1.43147	0.974619	Cont/Cont=	0.680203	1.3198	1.3198	=Avg Bort/Cont (16h, 5 nM)
HEK293T	bortezomib 16h, 5nM	4	3	2234.16	2234.15	40S Ribosomal protein S21	cytoplasm	m	GESDDSILRLAKADGIVSKNF	*		Bortez/Cont=	1.37255	1.37255	0.941176	Cont/Cont=	1.05882	0.941176	1.22876	=Avg Bort/Cont (16h, 5 nM)
HEK293T	bortezomib 16h, 5nM	2	1	2278.22	2278.16	Peptidylprolyl isomerase A	cytoplasm	*m	VNPTVFFDIAVDGEPLGRVSF	e		Bortez/Cont=	0.444444	0.444444	0.666667	Cont/Cont=	1.11111	0.888889	0.518519	=Avg Bort/Cont (16h, 5 nM)
HEK293T	bortezomib 16h, 5nM	4	1	2303.38	2303.29	Heat shock 10kDa protein 1 (chaperonin 10)	mitochondria	*m	Ac-AGQAFRKFLPLFDRVLVER	s		Bortez/Cont=	0.977778	0.888889	0.8	Cont/Cont=	1.06667	0.933333	0.888889	=Avg Bort/Cont (16h, 5 nM)
HEK293T	bortezomib 16h, 5nM	5	2	2309.34	2309.34	40S Ribosomal protein S28	cytoplasm	*	Ac-MDTSRVQPIKLARVTKVLGR	t		Bortez/Cont=	1.15556	1.33333	0.844444	Cont/Cont=	0.888889	1.11111	1.11111	=Avg Bort/Cont (16h, 5 nM)
HEK293T	bortezomib 16h, 5nM	4	2	2309.35	2309.34	40S Ribosomal protein S28	cytoplasm	*	Ac-MDTSRVQPIKLARVTKVLGR	t		Bortez/Cont=	1.08772	0.877193	0.701754	Cont/Cont=	0.947368	1.05263	0.888889	=Avg Bort/Cont (16h, 5 nM)
HEK293T	bortezomib 16h, 5nM	3	2	2333.25	2333.22	Macrophage migration inhibitory factor	cytoplasm	l	AQATGKPPQYIAVHVVPDQLMA	f		Bortez/Cont=	1.8125	2	1.5625	Cont/Cont=	1.125	0.875	1.79167	=Avg Bort/Cont (16h, 5 nM)
HEK293T	bortezomib 16h, 5nM	2	1	2357.26	2357.18	40S ribosomal protein S12	cytoplasm	*m	Ac-AEEGIAAGGVMDVNTALQEVLKT	a		Bortez/Cont=	0.956522	0.869565	0.956522	Cont/Cont=	0.956522	1.04348	0.927536	=Avg Bort/Cont (16h, 5 nM)
HEK293T	bortezomib 16h, 5nM	4	3	2365.24	2365.19	40S Ribosomal protein S21	cytoplasm	r	MGESDDSILRLAKADGIVSKNF	*		Bortez/Cont=	1.11111	0.793651	0.698413	Cont/Cont=	0.984127	1.01587	0.867725	=Avg Bort/Cont (16h, 5 nM)
HEK293T	bortezomib 16h, 5nM	3	3	2383.18	2383.13	Heat shock 70kDa protein 5	cytoplasm	a	EEEDKKEDVGTVVGIDLGTTYS	c		Bortez/Cont=	1.26891	1.19328	1.10924	Cont/Cont=	0.781513	1.21849	1.19048	=Avg Bort/Cont (16h, 5 nM)
HEK293T	bortezomib 16h, 5nM	4	1	2390.39	2390.32	Heat shock 10kDa protein 1 (chaperonin 10)	mitochondria	*m	Ac-AGQAFRKFLPLFDRVLVERS	a		Bortez/Cont=	0.539326	0.674157	0.741573	Cont/Cont=	1.07865	0.921348	0.651685	=Avg Bort/Cont (16h, 5 nM)
HEK293T	bortezomib 16h, 5nM	3	1	2390.42	2390.32	Heat shock 10kDa protein 1 (chaperonin 10)	mitochondria	*m	Ac-AGQAFRKFLPLFDRVLVERS	a		Bortez/Cont=	0.712329	0.684932	0.410959	Cont/Cont=	1.06849	0.931507	0.60274	=Avg Bort/Cont (16h, 5 nM)
HEK293T	bortezomib 16h, 5nM	4	3	2406.22	2406.17	Heat shock 10kDa protein 1 (chaperonin 10)	mitochondria	v	LDDKDYFLFRDGDILGKYVD	*		Bortez/Cont=	>5	>5	>5	Cont/Cont=	nd	nd	>5	=Avg Bortez/Cont (16h, 5nM)
HEK293T	bortezomib 16h, 5nM	4	4	2442.35	2442.32	Heat shock 10kDa protein 1 (chaperonin 10)	mitochondria	r	SAAETVTKGGIMLPEKSQGKVLQA	t		Bortez/Cont=	1.85714	1.7381	1.04762	Cont/Cont=	1.04762	0.952381	1.54762	=Avg Bortez/Cont (16h, 5nM)
HEK293T	bortezomib 16h, 5nM	3	2	2469.38	2469.33	Far upstream element-binding protein 2	nucleus	c	GLVIGRGGENVKAINQQTGAFVEI	s		Bortez/Cont=	1.05882	1.05882	0.823529	Cont/Cont=	0.941176	1.05882	0.980392	=Avg Bort/Cont (16h, 5 nM)
HEK293T	bortezomib 16h, 5nM	2	1	2480.23	2480.19	Splicing factor, arginine/serine-rich 2	nucleus	*m	Ac-SYGRPPPDVEGMTSLKVDNLTY	r		Bortez/Cont=	0.947791	0.923695	0.875502	Cont/Cont=	1.14056	0.859438	0.915663	=Avg Bort/Cont (16h, 5 nM)
HEK293T	bortezomib 16h, 5nM	4	3	2505.27	2505.24	Heat shock 10kDa protein 1 (chaperonin 10)	mitochondria	v	VLDDKDYFLFRDGDILGKYVD	*		Bortez/Cont=	1.41667	1.33333	1.16667	Cont/Cont=	1.08333	0.916667	1.30556	=Avg Bort/Cont (16h, 5 nM)
HEK293T	bortezomib 16h, 5nM	3	3	2505.33	2505.24	Heat shock 10kDa protein 1 (chaperonin 10)	mitochondria	v	VLDDKDYFLFRDGDILGKYVD	*		Bortez/Cont=	1.31429	1.42857	1.14286	Cont/Cont=	1.14286	0.857143	1.29524	=Avg Bort/Cont (16h, 5 nM)
HEK293T	bortezomib 16h, 5nM	5	3	2521.33	2521.3	40S Ribosomal protein S21	cytoplasm	r	RMGESDDSILRLAKADGIVSKNF	*		Bortez/Cont=	1.04762	0.809524	0.666667	Cont/Cont=	0.952381	1.04762	0.84127	=Avg Bort/Cont (16h, 5 nM)
HEK293T	bortezomib 16h, 5nM	3	2	2658.41	2658.35	Triosephosphate isomerase 1	cytoplasm	l	ASQPDVDGFLVGGASLKPEFVDIINA	k		Bortez/Cont=	1.2449	1.16327	1	Cont/Cont=	0.816327	1.18367	1.13605	=Avg Bortez/Cont (16h, 5nM)
HEK293T	bortezomib 16h, 5nM	2	2	2658.47	2658.35	Triosephosphate isomerase 1	cytoplasm	l	ASQPDVDGFLVGGASLKPEFVDIINA	k		Bortez/Cont=	1.19355	1.3871	1.01613	Cont/Cont=	0.951613	1.04839	1.19892	=Avg Bortez/Cont (16h, 5nM)
HEK293T	bortezomib 16h, 5nM	6	2	2678.52	2678.49	40S Ribosomal protein S28	cytoplasm	v	KGPVREGDVLTLLESEREARRLR	*		Bortez/Cont=	1.424	1.36	0.816	Cont/Cont=	0.944	1.056	1.2	=Avg Bortez/Cont (16h, 5nM)
HEK293T	bortezomib 16h, 5nM	5	2	2678.53	2678.49	40S Ribosomal protein S28	cytoplasm	v	KGPVREGDVLTLLESEREARRLR	*		Bortez/Cont=	0.765432	0.962963	1.20988	Cont/Cont=	0.765432	1.23457	0.979424	=Avg Bortez/Cont (16h, 5nM)
HEK293T	bortezomib 16h, 5nM	7	2	2678.57	2678.49	40S Ribosomal protein S28	cytoplasm	v	KGPVREGDVLTLLESEREARRLR	*		Bortez/Cont=	1.4023	1.21839	0.574713	Cont/Cont=	0.965517	1.03448	1.06513	=Avg Bortez/Cont (16h, 5nM)
HEK293T	bortezomib 16h, 5nM	3	2	2711.49	2711.46	Protein DJ-1 ( Parkinson disease protein 7)	nucleus	*m	Ac-ASKRALVILAKGAEEMETVIPVDVM	r		Bortez/Cont=	0.861538	0.707692	0.615385	Cont/Cont=	0.984615	1.01538	0.728205	=Avg Bort/Cont (16h, 5 nM)
HEK293T	bortezomib 16h, 5nM	3	3	2784.45	2784.4	Stress-induced-phosphoprotein 1	nucleus	*	Ac-MEQVNELKEKGNKALSVGNIDDALQ	c		Bortez/Cont=	2.16393	1.18033	1.42623	Cont/Cont=	0.852459	1.14754	1.59016	=Avg Bort/Cont (16h, 5 nM)
HEK293T	bortezomib 16h, 5nM	3	1	2824.34	2824.28	RNA binding motif protein 3	nucleus	*m	Ac-SSEEGKLFVGGLNFNTDEQALEDHF	s		Bortez/Cont=	0.666667	0.833333	0.9	Cont/Cont=	1	1	0.8	=Avg Bort/Cont (16h, 5 nM)
HEK293T	bortezomib 16h, 5nM	2	1	2824.37	2824.28	RNA binding motif protein 3	nucleus	*m	Ac-SSEEGKLFVGGLNFNTDEQALEDHF	s		Bortez/Cont=	0.777778	0.916667	0.916667	Cont/Cont=	0.972222	1.02778	0.87037	=Avg Bort/Cont (16h, 5 nM)
HEK293T	bortezomib 16h, 5nM	3	1	2872.59	2872.48	Macrophage migration inhibitory factor	cytoplasm	*m	PMFIVNTNVPRASVPDGFLSELTQQL	a		Bortez/Cont=	0.978261	1.08696	0.815217	Cont/Cont=	1.08696	0.913043	0.960145	=Avg Bort/Cont (16h, 5 nM)
HEK293T	bortezomib 16h, 5nM	3	3	2914.52	2914.51	Triosephosphate isomerase 1	cytoplasm	l	ASQPDVDGFLVGGASLKPEFVDIINAKQ	*		Bortez/Cont=	2.22222	2.33333	1.44444	Cont/Cont=	0.777778	1.22222	2	=Avg Bort/Cont (16h, 5 nM)
HEK293T	bortezomib 16h, 5nM	3	3	2914.53	2914.51	Triosephosphate isomerase 1	cytoplasm	l	ASQPDVDGFLVGGASLKPEFVDIINAKQ	*		Bortez/Cont=	1	0.97561	0.695122	Cont/Cont=	1.12195	0.878049	0.890244	=Avg Bort/Cont (16h, 5 nM)
HEK293T	bortezomib 16h, 5nM	3	2	3015.48	3015.41	Deoxyuridine 5'-triphosphate nucleotidohydrolase, mitochondrial	mitochondria	r	IFYPEIEEVQALDDTERGSGGFGSTGKN	*		Bortez/Cont=	1.38614	1.12871	0.970297	Cont/Cont=	1.0495	0.950495	1.16172	=Avg Bortez/Cont (16h, 5nM)
HEK293T	bortezomib 16h, 5nM	5	3	3175.69	3175.67	Peptidylprolyl isomerase A	cytoplasm	i	AVDGEPLGRVSFELFADKVPKTAENFRAL	s		Bortez/Cont=	1.2	0.977778	0.711111	Cont/Cont=	1.11111	0.888889	0.962963	=Avg Bort/Cont (16h, 5 nM)
HEK293T	bortezomib 16h, 5nM	4	2	3198.64	3198.6	Phosphatidylethanolamine-binding protein 1	cytoplasm	*m	PVDLSKWSGPLSLQEVDEQPQHPLHVTY	a		Bortez/Cont=	1.56098	0.97561	1.17073	Cont/Cont=	1.12195	0.878049	1.23577	=Avg Bort/Cont (16h, 5 nM)
HEK293T	bortezomib 16h, 5nM	4	4	3284.72	3284.73	Triosephosphate isomerase 1	cytoplasm	c	KELASQPDVDGFLVGGASLKPEFVDIINAKQ	*		Bortez/Cont=	1.04762	1.14286	0.809524	Cont/Cont=	0.857143	1.14286	1	=Avg Bort/Cont (16h, 5 nM)
HEK293T	bortezomib 16h, 5nM	7	8	4933.54	4933.52	Thymosin beta-10	cytoplasm	*m	Ac-ADKPDMGEIASFDKAKLKKTETQEKNTLPTKETIEQEKRSEIS	*	Monoisotopic mass	Bortez/Cont=	1.35484	1.29032	0.967742	Cont/Cont=	0.903226	1.09677	1.2043	=Avg Bort/Cont (16h, 5 nM)
HEK293T	bortezomib 16h, 5nM	9	8	4933.56	4933.52	Thymosin beta-10	cytoplasm	*m	Ac-ADKPDMGEIASFDKAKLKKTETQEKNTLPTKETIEQEKRSEIS	*	Monoisotopic mass	Bortez/Cont=	1.22222	1.11111	0.888889	Cont/Cont=	0.888889	1.11111	1.07407	=Avg Bort/Cont (16h, 5 nM)
HEK293T	bortezomib 16h, 5nM	8	8	4933.57	4933.52	Thymosin beta-10	cytoplasm	*m	Ac-ADKPDMGEIASFDKAKLKKTETQEKNTLPTKETIEQEKRSEIS	*	Monoisotopic mass	Bortez/Cont=	1.26316	1.15789	0.894737	Cont/Cont=	0.947368	1.05263	1.10526	=Avg Bort/Cont (16h, 5 nM)
HEK293T	bortezomib 16h, 5nM	6	8	4933.58	4933.52	Thymosin beta-10	cytoplasm	*m	Ac-ADKPDMGEIASFDKAKLKKTETQEKNTLPTKETIEQEKRSEIS	*	Monoisotopic mass	Bortez/Cont=	1.27778	1.16667	0.833333	Cont/Cont=	0.888889	1.11111	1.09259	=Avg Bort/Cont (16h, 5 nM)
HEK293T	bortezomib 16h, 5nM	5	8	4936.44	4936.49	Thymosin beta-10	cytoplasm	*m	Ac-ADKPDMGEIASFDKAKLKKTETQEKNTLPTKETIEQEKRSEIS	*	Average mass	Bortez/Cont=	0.982456	0.807018	1.05263	Cont/Cont=	0.77193	1.22807	0.947368	=Avg Bort/Cont (16h, 5 nM)
HEK293T	bortezomib 16h, 5nM	7	8	4936.47	4936.49	Thymosin beta-10	cytoplasm	*m	Ac-ADKPDMGEIASFDKAKLKKTETQEKNTLPTKETIEQEKRSEIS	*	Average mass	Bortez/Cont=	1.2	0.8	0.9	Cont/Cont=	0.933333	1.06667	0.966667	=Avg Bort/Cont (16h, 5 nM)
HEK293T	bortezomib 16h, 5nM	6	8	4936.48	4936.49	Thymosin beta-10	cytoplasm	*m	Ac-ADKPDMGEIASFDKAKLKKTETQEKNTLPTKETIEQEKRSEIS	*	Average mass	Bortez/Cont=	1.15385	0.74359	0.769231	Cont/Cont=	1	1	0.888889	=Avg Bort/Cont (16h, 5 nM)
HEK293T	bortezomib 16h, 5nM	8	8	4936.49	4936.49	Thymosin beta-10	cytoplasm	*m	Ac-ADKPDMGEIASFDKAKLKKTETQEKNTLPTKETIEQEKRSEIS	*	Average mass	Bortez/Cont=	1.3	0.8	0.9	Cont/Cont=	1	1	1	=Avg Bort/Cont (16h, 5 nM)
HEK293T	bortezomib 16h, 5nM	9	8	4936.58	4936.49	Thymosin beta-10	cytoplasm	*m	Ac-ADKPDMGEIASFDKAKLKKTETQEKNTLPTKETIEQEKRSEIS	*	Average mass	Bortez/Cont=	0.892857	0.785714	1.07143	Cont/Cont=	0.821429	1.17857	0.916667	=Avg Bort/Cont (16h, 5 nM)
HEK293T	bortezomib 16h, 5nM	8	9	4963.41	4963.51	Thymosin beta-4	cytoplasm	*m	Ac-SDKPDMAEIEKFDKSKLKKTETQEKNPLPSKETIEQEKQAGES	*	Average mass	Bortez/Cont=	1.77419	0.903226	1.93548	Cont/Cont=	1.03226	0.967742	1.53763	=Avg Bort/Cont (16h, 5 nM)
HEK293T	bortezomib 16h, 5nM	9	9	4963.59	4963.51	Thymosin beta-4	cytoplasm	*m	Ac-SDKPDMAEIEKFDKSKLKKTETQEKNPLPSKETIEQEKQAGES	*	Average mass	Bortez/Cont=	1.91489	1.06383	1.59574	Cont/Cont=	1.06383	0.93617	1.52482	=Avg Bort/Cont (16h, 5 nM)
HEK293T	bortezomib 16h, 5nM	7	9	4963.62	4963.51	Thymosin beta-4	cytoplasm	*m	Ac-SDKPDMAEIEKFDKSKLKKTETQEKNPLPSKETIEQEKQAGES	*	Average mass	Bortez/Cont=	1.27273	0.909091	1.63636	Cont/Cont=	1.09091	0.909091	1.27273	=Avg Bort/Cont (16h, 5 nM)
HEK293T	bortezomib 16h, 5nM	1	1	224.167								Bortez/Cont=	0.658228	0.721519	0.708861	Cont/Cont=	1.24051	0.759494	0.696203	=Avg Bort/Cont (16h, 5 nM)
HEK293T	bortezomib 16h, 5nM	2	2	600.396								Bortez/Cont=	0.737374	0.808081	0.707071	Cont/Cont=	0.737374	1.26263	0.750842	=Avg Bort/Cont (16h, 5 nM)
HEK293T	bortezomib 16h, 5nM	2	1	628.408								Bortez/Cont=	1.09714	1.05143	0.891429	Cont/Cont=	0.88	1.12	1.01333	=Avg Bort/Cont (16h, 5 nM)
HEK293T	bortezomib 16h, 5nM	2	1	668.421								Bortez/Cont=	1.14146	1.02439	0.595122	Cont/Cont=	1.01463	0.985366	0.920325	=Avg Bort/Cont (16h, 5 nM)
HEK293T	bortezomib 16h, 5nM	2	2	672.409								Bortez/Cont=	0.908257	1.16514	0.954128	Cont/Cont=	1.00917	0.990826	1.00917	=Avg Bort/Cont (16h, 5 nM)
HEK293T	bortezomib 16h, 5nM	2	1	696.398								Bortez/Cont=	0.941634	0.980545	0.856031	Cont/Cont=	1.07393	0.92607	0.92607	=Avg Bort/Cont (16h, 5 nM)
HEK293T	bortezomib 16h, 5nM	1	1	774.415								Bortez/Cont=	1.38728	0.774566	0.589595	Cont/Cont=	1.10983	0.890173	0.917148	=Avg Bort/Cont (16h, 5 nM)
HEK293T	bortezomib 16h, 5nM	2	1	813.486								Bortez/Cont=	1.32184	1.09195	0.831034	Cont/Cont=	0.977011	1.02299	1.08161	=Avg Bort/Cont (16h, 5 nM)
HEK293T	bortezomib 16h, 5nM	2	2	826.462								Bortez/Cont=	1.14563	1.00971	0.92233	Cont/Cont=	1.02913	0.970874	1.02589	=Avg Bort/Cont (16h, 5 nM)
HEK293T	bortezomib 16h, 5nM	2	1	848.472								Bortez/Cont=	0.888889	0.731481	0.555556	Cont/Cont=	1.02778	0.972222	0.725309	=Avg Bort/Cont (16h, 5 nM)
HEK293T	bortezomib 16h, 5nM	3	3	870.507								Bortez/Cont=	3.12	5	3.16	Cont/Cont=	1	1	3.76	=Avg Bort/Cont (16h, 5 nM)
HEK293T	bortezomib 16h, 5nM	2	2	939.569								Bortez/Cont=	1.13615	0.85446	0.760563	Cont/Cont=	1.0892	0.910798	0.917058	=Avg Bort/Cont (16h, 5 nM)
HEK293T	bortezomib 16h, 5nM	2	2	940.441								Bortez/Cont=	0.714286	0.571429	1.5	Cont/Cont=	0.571429	1.42857	0.928571	=Avg Bort/Cont (16h, 5 nM)
HEK293T	bortezomib 16h, 5nM	3	2	969.579								Bortez/Cont=	0.864322	0.824121	0.78392	Cont/Cont=	0.854271	1.14573	0.824121	=Avg Bort/Cont (16h, 5 nM)
HEK293T	bortezomib 16h, 5nM	2	1	987.49								Bortez/Cont=	1.03361	1.09244	0.882353	Cont/Cont=	0.94958	1.05042	1.0028	=Avg Bort/Cont (16h, 5 nM)
HEK293T	bortezomib 16h, 5nM	2	1	1011.56								Bortez/Cont=	0.996109	0.871595	0.793774	Cont/Cont=	1.00389	0.996109	0.88716	=Avg Bort/Cont (16h, 5 nM)
HEK293T	bortezomib 16h, 5nM	1	1	1015.45								Bortez/Cont=	1.89474	1.68421	1.36842	Cont/Cont=	1.05263	0.947368	1.64912	=Avg Bort/Cont (16h, 5 nM)
HEK293T	bortezomib 16h, 5nM	3	1	1037.6								Bortez/Cont=	1.10345	0.926108	0.788177	Cont/Cont=	0.857143	1.14286	0.939245	=Avg Bort/Cont (16h, 5 nM)
HEK293T	bortezomib 16h, 5nM	2	1	1049.55								Bortez/Cont=	1.1875	1.23958	0.979167	Cont/Cont=	1.07292	0.927083	1.13542	=Avg Bort/Cont (16h, 5 nM)
HEK293T	bortezomib 16h, 5nM	2	1	1062.54								Bortez/Cont=	1.33333	1.11111	po	Cont/Cont=	0.888889	1.11111	1.22222	=Avg Bort/Cont (16h, 5 nM)
HEK293T	bortezomib 16h, 5nM	2	2	1065.62								Bortez/Cont=	1.18692	0.850467	0.785047	Cont/Cont=	0.897196	1.1028	0.94081	=Avg Bort/Cont (16h, 5 nM)
HEK293T	bortezomib 16h, 5nM	2	1	1067.64								Bortez/Cont=	1.64964	1.76642	1.25547	Cont/Cont=	1.0365	0.963504	1.55718	=Avg Bort/Cont (16h, 5 nM)
HEK293T	bortezomib 16h, 5nM	2	1	1074.61								Bortez/Cont=	po	0.956522	1.13043	Cont/Cont=	1.21739	0.782609	1.04348	=Avg Bort/Cont (16h, 5 nM)
HEK293T	bortezomib 16h, 5nM	3	2	1114.59								Bortez/Cont=	2.2	1.26667	1.7	Cont/Cont=	1.33333	0.666667	1.72222	=Avg Bort/Cont (16h, 5 nM)
HEK293T	bortezomib 16h, 5nM	3	3	1118.65								Bortez/Cont=	1.48538	1.63743	1.11111	Cont/Cont=	0.947368	1.05263	1.41131	=Avg Bort/Cont (16h, 5 nM)
HEK293T	bortezomib 16h, 5nM	2	2	1136.62								Bortez/Cont=	1.19469	0.831858	0.752212	Cont/Cont=	0.938053	1.06195	0.926254	=Avg Bort/Cont (16h, 5 nM)
HEK293T	bortezomib 16h, 5nM	3	2	1145.62								Bortez/Cont=	1.05607	0.990654	1.16822	Cont/Cont=	1.16822	0.831776	1.07165	=Avg Bort/Cont (16h, 5 nM)
HEK293T	bortezomib 16h, 5nM	3	1	1160.72								Bortez/Cont=	1.22472	1.08989	0.921348	Cont/Cont=	0.955056	1.04494	1.07865	=Avg Bort/Cont (16h, 5 nM)
HEK293T	bortezomib 16h, 5nM	3	3	1183.64								Bortez/Cont=	3.55556	3.33333	3.11111	Cont/Cont=	1.11111	0.888889	3.33333	=Avg Bort/Cont (16h, 5 nM)
HEK293T	bortezomib 16h, 5nM	2	1	1206.6								Bortez/Cont=	0.952381	0.704762	0.580952	Cont/Cont=	0.87619	1.12381	0.746032	=Avg Bort/Cont (16h, 5 nM)
HEK293T	bortezomib 16h, 5nM	3	2	1216.65								Bortez/Cont=	1.2233	1	0.737864	Cont/Cont=	1.03883	0.961165	0.987055	=Avg Bort/Cont (16h, 5 nM)
HEK293T	bortezomib 16h, 5nM	3	1	1230.69								Bortez/Cont=	1.64634	1.52439	1.03659	Cont/Cont=	0.926829	1.07317	1.40244	=Avg Bort/Cont (16h, 5 nM)
HEK293T	bortezomib 16h, 5nM	3	1	1284.7								Bortez/Cont=	1.25926	1.06481	0.694444	Cont/Cont=	1.09259	0.907407	1.00617	=Avg Bort/Cont (16h, 5 nM)
HEK293T	bortezomib 16h, 5nM	4	1	1310.8								Bortez/Cont=	0.666667	0.757576	0.863636	Cont/Cont=	1.24242	0.757576	0.762626	=Avg Bort/Cont (16h, 5 nM)
HEK293T	bortezomib 16h, 5nM	3	1	1317.68								Bortez/Cont=	1.61404	1.45029	1.07602	Cont/Cont=	1.09942	0.900585	1.38012	=Avg Bort/Cont (16h, 5 nM)
HEK293T	bortezomib 16h, 5nM	4	2	1324.71								Bortez/Cont=	1.13592	0.980583	0.899029	Cont/Cont=	0.941748	1.05825	1.00518	=Avg Bort/Cont (16h, 5 nM)
HEK293T	bortezomib 16h, 5nM	3	2	1329.61								Bortez/Cont=	1.22271	0.882096	0.681223	Cont/Cont=	0.934498	1.0655	0.928675	=Avg Bort/Cont (16h, 5 nM)
HEK293T	bortezomib 16h, 5nM	4	1	1337.74								Bortez/Cont=	0.91866	0.784689	1.07177	Cont/Cont=	1.03349	0.966507	0.92504	=Avg Bort/Cont (16h, 5 nM)
HEK293T	bortezomib 16h, 5nM	3	1	1337.76								Bortez/Cont=	0.944724	1.11558	0.824121	Cont/Cont=	1.04523	0.954774	0.961474	=Avg Bort/Cont (16h, 5 nM)
HEK293T	bortezomib 16h, 5nM	2	1	1340.71								Bortez/Cont=	1.0655	1.0655	0.829694	Cont/Cont=	0.9869	1.0131	0.9869	=Avg Bort/Cont (16h, 5 nM)
HEK293T	bortezomib 16h, 5nM	2	1	1344.73								Bortez/Cont=	1.08	1.08	0.904	Cont/Cont=	1.008	0.992	1.02133	=Avg Bort/Cont (16h, 5 nM)
HEK293T	bortezomib 16h, 5nM	3	3	1365.76								Bortez/Cont=	0.625	1.08333	0.666667	Cont/Cont=	0.677083	1.32292	0.791667	=Avg Bort/Cont (16h, 5 nM)
HEK293T	bortezomib 16h, 5nM	2	2	1368.75								Bortez/Cont=	0.736402	1.35565	0.828452	Cont/Cont=	0.845188	1.15481	0.973501	=Avg Bort/Cont (16h, 5 nM)
HEK293T	bortezomib 16h, 5nM	3	1	1376.81								Bortez/Cont=	3.2	2.4	6	Cont/Cont=	1.2	0.8	3.86667	=Avg Bort/Cont (16h, 5 nM)
HEK293T	bortezomib 16h, 5nM	3	3	1383.79								Bortez/Cont=	0.769231	1.2	0.523077	Cont/Cont=	0.54359	1.45641	0.830769	=Avg Bort/Cont (16h, 5 nM)
HEK293T	bortezomib 16h, 5nM	2	1	1389.69								Bortez/Cont=	1.01992	0.908367	0.741036	Cont/Cont=	1.01195	0.988048	0.889774	=Avg Bort/Cont (16h, 5 nM)
HEK293T	bortezomib 16h, 5nM	2	2	1398.67								Bortez/Cont=	1.18298	1.2	0.978723	Cont/Cont=	0.919149	1.08085	1.12057	=Avg Bort/Cont (16h, 5 nM)
HEK293T	bortezomib 16h, 5nM	2	1	1415.77								Bortez/Cont=	1.19444	1.18519	0.916667	Cont/Cont=	1.05556	0.944444	1.09877	=Avg Bort/Cont (16h, 5 nM)
HEK293T	bortezomib 16h, 5nM	3	1	1430.85								Bortez/Cont=	0.96	0.92	1.38	Cont/Cont=	1.04	0.96	1.08667	=Avg Bort/Cont (16h, 5 nM)
HEK293T	bortezomib 16h, 5nM	4	2	1442.73								Bortez/Cont=	0.912	0.864	0.816	Cont/Cont=	0.992	1.008	0.864	=Avg Bort/Cont (16h, 5 nM)
HEK293T	bortezomib 16h, 5nM	3	3	1454.78								Bortez/Cont=	2.0292	2.0146	1.27007	Cont/Cont=	0.992701	1.0073	1.77129	=Avg Bort/Cont (16h, 5 nM)
HEK293T	bortezomib 16h, 5nM	3	3	1455.84								Bortez/Cont=	2.63529	3.64706	2.63529	Cont/Cont=	0.964706	1.03529	2.97255	=Avg Bort/Cont (16h, 5 nM)
HEK293T	bortezomib 16h, 5nM	4	3	1477.77								Bortez/Cont=	1.68421	2.94737	1.95789	Cont/Cont=	1.13684	0.863158	2.19649	=Avg Bort/Cont (16h, 5 nM)
HEK293T	bortezomib 16h, 5nM	3	2	1485.84								Bortez/Cont=	2.1374	1.57252	0.900763	Cont/Cont=	0.717557	1.28244	1.5369	=Avg Bort/Cont (16h, 5 nM)
HEK293T	bortezomib 16h, 5nM	2	1	1521.83								Bortez/Cont=	1.29907	1.28972	1.17757	Cont/Cont=	0.962617	1.03738	1.25545	=Avg Bort/Cont (16h, 5 nM)
HEK293T	bortezomib 16h, 5nM	2	2	1522.76								Bortez/Cont=	1.176	1.024	1.168	Cont/Cont=	1.016	0.984	1.12267	=Avg Bort/Cont (16h, 5 nM)
HEK293T	bortezomib 16h, 5nM	3	1	1534.91								Bortez/Cont=	1.80488	1.65854	2.26829	Cont/Cont=	1.02439	0.97561	1.91057	=Avg Bort/Cont (16h, 5 nM)
HEK293T	bortezomib 16h, 5nM	3	2	1536.77								Bortez/Cont=	>5	>5	>5	Cont/Cont=	nd	nd	>5	=Avg Bort/Cont (16h, 5 nM)
HEK293T	bortezomib 16h, 5nM	3	2	1556.88								Bortez/Cont=	2.07407	1.05185	1.17037	Cont/Cont=	0.651852	1.34815	1.4321	=Avg Bort/Cont (16h, 5 nM)
HEK293T	bortezomib 16h, 5nM	3	2	1557.76								Bortez/Cont=	0.987876	0.799282	0.65559	Cont/Cont=	1.04176	0.95824	0.814249	=Avg Bort/Cont (16h, 5 nM)
HEK293T	bortezomib 16h, 5nM	2	1	1575.78								Bortez/Cont=	0.907407	1	1.12963	Cont/Cont=	0.87963	1.12037	1.01235	=Avg Bort/Cont (16h, 5 nM)
HEK293T	bortezomib 16h, 5nM	3	3	1584.87								Bortez/Cont=	0.666667	1.10798	0.957746	Cont/Cont=	0.920188	1.07981	0.910798	=Avg Bort/Cont (16h, 5 nM)
HEK293T	bortezomib 16h, 5nM	2	1	1590.68								Bortez/Cont=	1.42222	1.11111	1.94074	Cont/Cont=	0.992593	1.00741	1.49136	=Avg Bort/Cont (16h, 5 nM)
HEK293T	bortezomib 16h, 5nM	3	2	1590.89								Bortez/Cont=	0.2	0.2	0.2	Cont/Cont=	0.92	1.08	0.2	=Avg Bort/Cont (16h, 5 nM)
HEK293T	bortezomib 16h, 5nM	3	3	1645.86								Bortez/Cont=	0.235294	0.235294	0.176471	Cont/Cont=	1.05882	0.941176	0.215686	=Avg Bort/Cont (16h, 5 nM)
HEK293T	bortezomib 16h, 5nM	2	2	1648.84								Bortez/Cont=	1.35577	1	0.855769	Cont/Cont=	1.08654	0.913462	1.07051	=Avg Bort/Cont (16h, 5 nM)
HEK293T	bortezomib 16h, 5nM	4	3	1650.78								Bortez/Cont=	0.928571	0.857143	1.07143	Cont/Cont=	1.07143	0.928571	0.952381	=Avg Bort/Cont (16h, 5 nM)
HEK293T	bortezomib 16h, 5nM	4	4	1656.86								Bortez/Cont=	2.27848	2.78481	1.82278	Cont/Cont=	0.886076	1.11392	2.29536	=Avg Bort/Cont (16h, 5 nM)
HEK293T	bortezomib 16h, 5nM	2	1	1679.83								Bortez/Cont=	1.10833	1.18333	1.25	Cont/Cont=	0.991667	1.00833	1.18056	=Avg Bort/Cont (16h, 5 nM)
HEK293T	bortezomib 16h, 5nM	3	2	1698.9								Bortez/Cont=	0.912698	1	0.706349	Cont/Cont=	1.02381	0.97619	0.873016	=Avg Bort/Cont (16h, 5 nM)
HEK293T	bortezomib 16h, 5nM	3	1	1725.88								Bortez/Cont=	0.171429	0.571429	0.557143	Cont/Cont=	1.34286	0.657143	0.433333	=Avg Bort/Cont (16h, 5 nM)
HEK293T	bortezomib 16h, 5nM	3	1	1755.02								Bortez/Cont=	0.957447	1.08511	0.943262	Cont/Cont=	1.07092	0.929078	0.995272	=Avg Bort/Cont (16h, 5 nM)
HEK293T	bortezomib 16h, 5nM	4	1	1790.07								Bortez/Cont=	1.07143	1.07143	1.71429	Cont/Cont=	1.14286	0.857143	1.28571	=Avg Bort/Cont (16h, 5 nM)
HEK293T	bortezomib 16h, 5nM	5	1	1790.07								Bortez/Cont=	0.75	0.791667	1.5	Cont/Cont=	1.08333	0.916667	1.01389	=Avg Bort/Cont (16h, 5 nM)
HEK293T	bortezomib 16h, 5nM	3	2	1801.95								Bortez/Cont=	0.586207	1.37931	1.65517	Cont/Cont=	0.62069	1.37931	1.2069	=Avg Bort/Cont (16h, 5 nM)
HEK293T	bortezomib 16h, 5nM	4	1	1856.12								Bortez/Cont=	2	1.81818	1.09091	Cont/Cont=	0.909091	1.09091	1.63636	=Avg Bort/Cont (16h, 5 nM)
HEK293T	bortezomib 16h, 5nM	4	1	1884.1								Bortez/Cont=	2.06173	1.08642	1.35802	Cont/Cont=	0.975309	1.02469	1.50206	=Avg Bort/Cont (16h, 5 nM)
HEK293T	bortezomib 16h, 5nM	4	3	1894.82								Bortez/Cont=	0.965517	0.965517	1.03448	Cont/Cont=	1.17241	0.827586	0.988506	=Avg Bort/Cont (16h, 5 nM)
HEK293T	bortezomib 16h, 5nM	4	3	1948.06								Bortez/Cont=	1.04813	1.01604	0.877005	Cont/Cont=	0.930481	1.06952	0.980392	=Avg Bort/Cont (16h, 5 nM)
HEK293T	bortezomib 16h, 5nM	4	3	1948.08								Bortez/Cont=	1.01333	0.666667	1	Cont/Cont=	1.06667	0.933333	0.893333	=Avg Bort/Cont (16h, 5 nM)
HEK293T	bortezomib 16h, 5nM	3	2	1961.09								Bortez/Cont=	0.198413	0.285714	0.15873	Cont/Cont=	0.888889	1.11111	0.214286	=Avg Bort/Cont (16h, 5 nM)
HEK293T	bortezomib 16h, 5nM	4	3	2009.88								Bortez/Cont=	1.08333	1.33333	0.875	Cont/Cont=	0.75	1.25	1.09722	=Avg Bort/Cont (16h, 5 nM)
HEK293T	bortezomib 16h, 5nM	4	2	2011.08								Bortez/Cont=	1.3	0.9	0.5	Cont/Cont=	1.1	0.9	0.9	=Avg Bort/Cont (16h, 5 nM)
HEK293T	bortezomib 16h, 5nM	3	2	2011.09								Bortez/Cont=	1.29032	0.924731	0.344086	Cont/Cont=	1.24731	0.752688	0.853047	=Avg Bort/Cont (16h, 5 nM)
HEK293T	bortezomib 16h, 5nM	2	2	2087.05								Bortez/Cont=	1.60209	1.49738	1.17277	Cont/Cont=	0.86911	1.13089	1.42408	=Avg Bort/Cont (16h, 5 nM)
HEK293T	bortezomib 16h, 5nM	3	1	2122								Bortez/Cont=	1.85542	1.07229	1.74699	Cont/Cont=	1.15663	0.843373	1.55823	=Avg Bort/Cont (16h, 5 nM)
HEK293T	bortezomib 16h, 5nM	4	1	2150.33								Bortez/Cont=	2	1.31707	1.53659	Cont/Cont=	1.41463	0.585366	1.61789	=Avg Bort/Cont (16h, 5 nM)
HEK293T	bortezomib 16h, 5nM	3	1	2179.02								Bortez/Cont=	1.74566	0.924855	1.58382	Cont/Cont=	1.15607	0.843931	1.41811	=Avg Bort/Cont (16h, 5 nM)
HEK293T	bortezomib 16h, 5nM	4	4	2185.07								Bortez/Cont=	0.943548	1.09677	0.846774	Cont/Cont=	0.774194	1.22581	0.962366	=Avg Bort/Cont (16h, 5 nM)
HEK293T	bortezomib 16h, 5nM	3	3	2186.23								Bortez/Cont=	1	0.737705	0.672131	Cont/Cont=	1.11475	0.885246	0.803279	=Avg Bort/Cont (16h, 5 nM)
HEK293T	bortezomib 16h, 5nM	4	3	2302.15								Bortez/Cont=	2.49153	1.55932	1.42373	Cont/Cont=	0.728814	1.27119	1.82486	=Avg Bort/Cont (16h, 5 nM)
HEK293T	bortezomib 16h, 5nM	3	1	2308.08								Bortez/Cont=	0.734177	1.35865	0.810127	Cont/Cont=	0.835443	1.16456	0.967651	=Avg Bort/Cont (16h, 5 nM)
HEK293T	bortezomib 16h, 5nM	4	4	2355.32								Bortez/Cont=	1.21569	1.22353	0.92549	Cont/Cont=	1.04314	0.956863	1.12157	=Avg Bort/Cont (16h, 5 nM)
HEK293T	bortezomib 16h, 5nM	4	3	2382.14								Bortez/Cont=	2.37879	1.5303	1.45455	Cont/Cont=	0.848485	1.15152	1.78788	=Avg Bort/Cont (16h, 5 nM)
HEK293T	bortezomib 16h, 5nM	3	1	2424.18								Bortez/Cont=	0.934363	0.833977	0.656371	Cont/Cont=	1.0888	0.911197	0.808237	=Avg Bort/Cont (16h, 5 nM)
HEK293T	bortezomib 16h, 5nM	5	2	2438.36								Bortez/Cont=	<0.2	<0.2	<0.2	Cont/Cont=	0.928571	1.07143	<0.2	=Avg Bort/Cont (16h, 5 nM)
HEK293T	bortezomib 16h, 5nM	4	2	2525.29								Bortez/Cont=	0.959108	0.877323	0.973978	Cont/Cont=	1.01859	0.981413	0.936803	=Avg Bort/Cont (16h, 5 nM)
HEK293T	bortezomib 16h, 5nM	4	1	2533.58								Bortez/Cont=	0.88	0.933333	0.84	Cont/Cont=	0.88	1.12	0.884444	=Avg Bort/Cont (16h, 5 nM)
HEK293T	bortezomib 16h, 5nM	5	3	2581.11								Bortez/Cont=	0.6	1.33333	1.9	Cont/Cont=	1.26667	0.733333	1.27778	=Avg Bort/Cont (16h, 5 nM)
HEK293T	bortezomib 16h, 5nM	5	2	2581.14								Bortez/Cont=	0.9	0.8	2.85	Cont/Cont=	0.7	1.3	1.51667	=Avg Bort/Cont (16h, 5 nM)
HEK293T	bortezomib 16h, 5nM	2	1	2631.21								Bortez/Cont=	1.53769	0.914573	1.40704	Cont/Cont=	1.12563	0.874372	1.28643	=Avg Bort/Cont (16h, 5 nM)
HEK293T	bortezomib 16h, 5nM	3	1	2631.22								Bortez/Cont=	1.77515	0.852071	1.5503	Cont/Cont=	1.1716	0.828402	1.3925	=Avg Bort/Cont (16h, 5 nM)
HEK293T	bortezomib 16h, 5nM	5	4	2680.16								Bortez/Cont=	0.958904	0.821918	1.0274	Cont/Cont=	0.958904	1.0411	0.936073	=Avg Bort/Cont (16h, 5 nM)
HEK293T	bortezomib 16h, 5nM	6	2	2777.62								Bortez/Cont=	1.01661	0.89701	0.784053	Cont/Cont=	1.0299	0.9701	0.899225	=Avg Bort/Cont (16h, 5 nM)
HEK293T	bortezomib 16h, 5nM	3	1	2799.18								Bortez/Cont=	0.813793	1.11724	0.972414	Cont/Cont=	0.944828	1.05517	0.967816	=Avg Bort/Cont (16h, 5 nM)
HEK293T	bortezomib 16h, 5nM	4	2	2835.39								Bortez/Cont=	1.1374	0.923664	0.969466	Cont/Cont=	1.08397	0.916031	1.01018	=Avg Bort/Cont (16h, 5 nM)
HEK293T	bortezomib 16h, 5nM	4	1	2862.66								Bortez/Cont=	0.8	0.7	1.0875	Cont/Cont=	0.95	1.05	0.8625	=Avg Bort/Cont (16h, 5 nM)
HEK293T	bortezomib 16h, 5nM	3	3	2926.48								Bortez/Cont=	1.16935	1.06452	1.06452	Cont/Cont=	0.919355	1.08065	1.09946	=Avg Bort/Cont (16h, 5 nM)
HEK293T	bortezomib 16h, 5nM	4	2	3076.62								Bortez/Cont=	1.17273	0.772727	0.690909	Cont/Cont=	1.09091	0.909091	0.878788	=Avg Bort/Cont (16h, 5 nM)
HEK293T	bortezomib 16h, 5nM	4	4	3105.4								Bortez/Cont=	1.1004	1.10843	1.04418	Cont/Cont=	0.915663	1.08434	1.08434	=Avg Bort/Cont (16h, 5 nM)
HEK293T	bortezomib 16h, 5nM	4	2	3248.71								Bortez/Cont=	1.12021	1.01403	0.796359	Cont/Cont=	0.976109	1.02389	0.976868	=Avg Bort/Cont (16h, 5 nM)
HEK293T	bortezomib 16h, 5nM	3	2	3248.72								Bortez/Cont=	1.19008	1.13223	0.876033	Cont/Cont=	0.909091	1.09091	1.06612	=Avg Bort/Cont (16h, 5 nM)
HEK293T	bortezomib 16h, 5nM	4	4	3285.56								Bortez/Cont=	0.75	0.678571	0.857143	Cont/Cont=	1.25	0.75	0.761905	=Avg Bort/Cont (16h, 5 nM)
HEK293T	bortezomib 16h, 5nM	5	4	3788.87								Bortez/Cont=	1.11719	1.11719	1.07031	Cont/Cont=	0.929688	1.07031	1.10156	=Avg Bort/Cont (16h, 5 nM)
HEK293T	bortezomib 16h, 5nM	8	8	4410.18								Bortez/Cont=	1.07071	0.996633	0.882155	Cont/Cont=	0.942761	1.05724	0.983165	=Avg Bort/Cont (16h, 5 nM)
HEK293T	bortezomib 16h, 5nM	6	4	4729.62								Bortez/Cont=	1.6087	1.21739	0.978261	Cont/Cont=	1	1	1.26812	=Avg Bort/Cont (16h, 5 nM)
HEK293T	bortezomib 16h, 5nM	7	4	4730.62								Bortez/Cont=	1.68	1.16	0.6	Cont/Cont=	0.88	1.12	1.14667	=Avg Bort/Cont (16h, 5 nM)
HEK293T	bortezomib 1h, 500nM	2	1	2824.25	2824.28	RNA binding motif protein 3	nucleus	*m	Ac-SSEEGKLFVGGLNFNTDEQALEDHF	s		Bortez/Cont=	0.125	0.208333	0.208333	Cont/Cont=	0.875	1.125	0.180556	=Avg Bort/Cont (1h, 500nM)
HEK293T	bortezomib 1h, 500nM	3	2	2711.46	2711.46	Protein DJ-1 ( Parkinson disease protein 7)	nucleus	*m	Ac-ASKRALVILAKGAEEMETVIPVDVM	r		Bortez/Cont=	0.222222	0.207407	0.177778	Cont/Cont=	0.962963	1.03704	0.202469	=Avg Bort/Cont (1h, 500nM)
HEK293T	bortezomib 1h, 500nM	2	2	1685.93	1685.92	Prefoldin subunit 1	cytoplasm	*m	Ac-AAPVDLELKKAFTEL	q		Bortez/Cont=	0.27027	0.297297	0.283784	Cont/Cont=	1.02703	0.972973	0.283784	=Avg Bort/Cont (1h, 500nM)
HEK293T	bortezomib 1h, 500nM	2	1	1011.65	1011.63	Protein DJ-1 ( Parkinson disease protein 7)	nucleus	*m	Ac-ASKRALVIL	a		Bortez/Cont=	0.32	0.336	0.304	Cont/Cont=	1.04	0.96	0.328	=Avg Bort/Cont (1h, 500nM)
HEK293T	bortezomib 1h, 500nM	2	1	1082.69	1082.67	Protein DJ-1 ( Parkinson disease protein 7)	nucleus	*m	Ac-ASKRALVILA	k		Bortez/Cont=	0.347826	0.382609	0.313043	Cont/Cont=	1.04348	0.956522	0.365217	=Avg Bort/Cont (1h, 500nM)
HEK293T	bortezomib 1h, 500nM	2	2	1905.98	1905.98	Eukaryotic translation elongation factor 1 beta	cytoplasm	*m	GFGDLKSPAGLQVLNDYL	a		Bortez/Cont=	0.48	0.432	0.464	Cont/Cont=	1.008	0.992	0.456	=Avg Bort/Cont (1h, 500nM)
HEK293T	bortezomib 1h, 500nM	1	1	1524.72	1524.75	RNA binding motif protein 3	nucleus	*m	Ac-SSEEGKLFVGGLNF	n		Bortez/Cont=	0.394737	0.447368	0.526316	Cont/Cont=	0.973684	1.02632	0.45614	=Avg Bort/Cont (1h, 500nM)
HEK293T	bortezomib 1h, 500nM	2	1	2480.21	2480.19	Splicing factor, arginine/serine-rich 2	nucleus	*m	Ac-SYGRPPPDVEGMTSLKVDNLTY	r		Bortez/Cont=	0.390244	0.536585	0.487805	Cont/Cont=	0.780488	1.21951	0.471545	=Avg Bort/Cont (1h, 500nM)
HEK293T	bortezomib 1h, 500nM	2	1	2357.16	2357.18	40S ribosomal protein S12	cytoplasm	*m	Ac-AEEGIAAGGVMDVNTALQEVLKT	a		Bortez/Cont=	0.56	0.48	0.4	Cont/Cont=	1.04	0.96	0.48	=Avg Bort/Cont (1h, 500nM)
HEK293T	bortezomib 1h, 500nM	3	2	1906	1905.98	Eukaryotic translation elongation factor 1 beta	cytoplasm	*m	GFGDLKSPAGLQVLNDYL	a		Bortez/Cont=	0.514706	0.514706	0.441176	Cont/Cont=	0.955882	1.04412	0.490196	=Avg Bort/Cont (1h, 500nM)
HEK293T	bortezomib 1h, 500nM	3	1	1805.98	1805.99	Heat shock 10kDa protein 1 (chaperonin 10)	mitochondria	*m	Ac-AGQAFRKFLPLFDRV	l		Bortez/Cont=	0.463158	0.652632	0.547368	Cont/Cont=	1.03158	0.968421	0.557895	=Avg Bort/Cont (1h, 500nM)
HEK293T	bortezomib 1h, 500nM	2	2	1400.76	1400.77	Eukaryotic translation elongation factor 1 beta	cytoplasm	*m	GFGDLKSPAGLQVL	n		Bortez/Cont=	0.721311	0.590164	0.540984	Cont/Cont=	1.09836	0.901639	0.655738	=Avg Bort/Cont (1h, 500nM)
HEK293T	bortezomib 1h, 500nM	3	3	1611.86	1611.78	Cytochrome c oxidase subunit 6b	mitochondria	*m	Ac-AEDMETKIKNYKT	a		Bortez/Cont=	0.692308	0.653846	0.653846	Cont/Cont=	0.961538	1.03846	0.666667	=Avg Bort/Cont (1h, 500nM)
HEK293T	bortezomib 1h, 500nM	2	1	1524.78	1524.75	RNA binding motif protein 3	nucleus	*m	Ac-SSEEGKLFVGGLNF	n		Bortez/Cont=	0.516129	0.83871	po	Cont/Cont=	0.903226	1.09677	0.677419	=Avg Bort/Cont (1h, 500nM)
HEK293T	bortezomib 1h, 500nM	2	1	2216.06	2216.08	Splicing factor, arginine/serine-rich 2	nucleus	*m	Ac-SYGRPPPDVEGMTSLKVDNL	t		Bortez/Cont=	0.943396	0.754717	0.754717	Cont/Cont=	1	1	0.81761	=Avg Bort/Cont (1h, 500nM)
HEK293T	bortezomib 1h, 500nM	2	2	1662.95	1662.93	Prohibitin	mitochondria	*m	Ac-AAKVFESIGKFGLALA	v		Bortez/Cont=	0.873016	0.825397	0.936508	Cont/Cont=	1.04762	0.952381	0.849206	=Avg Bort/Cont (1h, 500nM)
HEK293T	bortezomib 1h, 500nM	1	1	1050.55	1050.54	Peptidylprolyl isomerase A	cytoplasm	*m	VNPTVFFDI	a		Bortez/Cont=	1.07317	0.97561	0.585366	Cont/Cont=	1.21951	0.780488	0.878049	=Avg Bort/Cont (1h, 500nM)
HEK293T	bortezomib 1h, 500nM	4	2	3198.59	3198.6	Phosphatidylethanolamine-binding protein 1	cytoplasm	*m	PVDLSKWSGPLSLQEVDEQPQHPLHVTY	a		Bortez/Cont=	1.01852	0.925926	0.833333	Cont/Cont=	0.925926	1.07407	0.925926	=Avg Bort/Cont (1h, 500nM)
HEK293T	bortezomib 1h, 500nM	5	8	4934.7	4933.52	Thymosin beta-10	cytoplasm	*m	Ac-ADKPDMGEIASFDKAKLKKTETQEKNTLPTKETIEQEKRSEIS	*	Monoisotopic mass	Bortez/Cont=	0.983607	0.819672	0.983607	Cont/Cont=	1.08197	0.918033	0.928962	=Avg Bort/Cont (1h, 500nM)
HEK293T	bortezomib 1h, 500nM	8	8	4934.64	4933.52	Thymosin beta-10	cytoplasm	*m	Ac-ADKPDMGEIASFDKAKLKKTETQEKNTLPTKETIEQEKRSEIS	*	Monoisotopic mass	Bortez/Cont=	0.962963	0.888889	0.962963	Cont/Cont=	1.03704	0.962963	0.938272	=Avg Bort/Cont (1h, 500nM)
HEK293T	bortezomib 1h, 500nM	3	2	3198.64	3198.6	Phosphatidylethanolamine-binding protein 1	cytoplasm	*m	PVDLSKWSGPLSLQEVDEQPQHPLHVTY	a		Bortez/Cont=	1.06195	0.973451	0.79646	Cont/Cont=	0.884956	1.11504	0.943953	=Avg Bort/Cont (1h, 500nM)
HEK293T	bortezomib 1h, 500nM	4	8	4934.74	4933.52	Thymosin beta-10	cytoplasm	*m	Ac-ADKPDMGEIASFDKAKLKKTETQEKNTLPTKETIEQEKRSEIS	*	Monoisotopic mass	Bortez/Cont=	1	0.833333	1	Cont/Cont=	1.1	0.9	0.944444	=Avg Bort/Cont (1h, 500nM)
HEK293T	bortezomib 1h, 500nM	9	8	4934.54	4933.52	Thymosin beta-10	cytoplasm	*m	Ac-ADKPDMGEIASFDKAKLKKTETQEKNTLPTKETIEQEKRSEIS	*	Monoisotopic mass	Bortez/Cont=	1	0.92	0.96	Cont/Cont=	1	1	0.96	=Avg Bort/Cont (1h, 500nM)
HEK293T	bortezomib 1h, 500nM	2	1	1050.55	1050.54	Peptidylprolyl isomerase A	cytoplasm	*m	VNPTVFFDI	a		Bortez/Cont=	0.938776	1.14286	0.816327	Cont/Cont=	1.22449	0.77551	0.965986	=Avg Bort/Cont (1h, 500nM)
HEK293T	bortezomib 1h, 500nM	7	8	4933.64	4933.52	Thymosin beta-10	cytoplasm	*m	Ac-ADKPDMGEIASFDKAKLKKTETQEKNTLPTKETIEQEKRSEIS	*	Monoisotopic mass	Bortez/Cont=	0.977778	0.962963	0.992593	Cont/Cont=	1.03704	0.962963	0.977778	=Avg Bort/Cont (1h, 500nM)
HEK293T	bortezomib 1h, 500nM	2	1	2071.04	2071.06	Proteasome maturation protein	nucleus	*	Ac-MNARGLGSELKDSIPVTEL	s		Bortez/Cont=	1	1	1	Cont/Cont=	1	1	1	=Avg Bort/Cont (1h, 500nM)
HEK293T	bortezomib 1h, 500nM	2	1	1584.81	1584.82	Methylosome subunit pICln (AltName: Chloride channel, nucleotide sensitive 1A)	nucleus	*m	Ac-SFLKSFPPPGPAEGL	l		Bortez/Cont=	0.941176	1.05882	0.941176	Cont/Cont=	1.05882	0.941176	1	=Avg Bort/Cont (1h, 500nM)
HEK293T	bortezomib 1h, 500nM	6	8	4933.66	4933.52	Thymosin beta-10	cytoplasm	*m	Ac-ADKPDMGEIASFDKAKLKKTETQEKNTLPTKETIEQEKRSEIS	*	Monoisotopic mass	Bortez/Cont=	1	1	1	Cont/Cont=	1.04286	0.957143	1	=Avg Bort/Cont (1h, 500nM)
HEK293T	bortezomib 1h, 500nM	7	9	4963.62	4963.51	Thymosin beta-4	cytoplasm	*m	Ac-SDKPDMAEIEKFDKSKLKKTETQEKNPLPSKETIEQEKQAGES	*	Average mass	Bortez/Cont=	1.08527	0.930233	1.00775	Cont/Cont=	1.03876	0.96124	1.00775	=Avg Bort/Cont (1h, 500nM)
HEK293T	bortezomib 1h, 500nM	2	2	1478.83	1478.81	Prohibitin	mitochondria	*m	Ac-AAKVFESIGKFGLA	l		Bortez/Cont=	1.21818	0.963636	1.12727	Cont/Cont=	0.963636	1.03636	1.09091	=Avg Bort/Cont (1h, 500nM)
HEK293T	bortezomib 1h, 500nM	2	2	1397.77	1397.76	Phosphatidylethanolamine-binding protein 1	cytoplasm	*m	PVDLSKWSGPLSL	q		Bortez/Cont=	1.10169	1.23729	1.10169	Cont/Cont=	1.10169	0.898305	1.14689	=Avg Bort/Cont (1h, 500nM)
HEK293T	bortezomib 1h, 500nM	5	2	2309.35	2309.34	40S Ribosomal protein S28	cytoplasm	*	Ac-MDTSRVQPIKLARVTKVLGR	t		Bortez/Cont=	1.34737	1.34737	1.15789	Cont/Cont=	1.11579	0.884211	1.28421	=Avg Bort/Cont (1h, 500nM)
HEK293T	bortezomib 1h, 500nM	4	2	2309.36	2309.34	40S Ribosomal protein S28	cytoplasm	*	Ac-MDTSRVQPIKLARVTKVLGR	t		Bortez/Cont=	1.39535	1.30233	1.16279	Cont/Cont=	1.06977	0.930233	1.28682	=Avg Bort/Cont (1h, 500nM)
HEK293T	bortezomib 1h, 500nM	2	1	1328.67	1328.71	40S Ribosomal protein S28	cytoplasm	*	Ac-MDTSRVQPIKL	a		Bortez/Cont=	1.71429	1.28571	1.28571	Cont/Cont=	1	1	1.42857	=Avg Bort/Cont (1h, 500nM)
HEK293T	bortezomib 1h, 500nM	3	1	1555.85	1555.85	40S Ribosomal protein S28	cytoplasm	*	Ac-MDTSRVQPIKLAR	v		Bortez/Cont=	1.33333	1.6	1.66667	Cont/Cont=	1	1	1.53333	=Avg Bort/Cont (1h, 500nM)
HEK293T	bortezomib 1h, 500nM	2	1	1555.85	1555.85	40S Ribosomal protein S28	cytoplasm	*	Ac-MDTSRVQPIKLAR	v		Bortez/Cont=	1.51515	1.63636	1.51515	Cont/Cont=	1.09091	0.909091	1.55556	=Avg Bort/Cont (1h, 500nM)
HEK293T	bortezomib 1h, 500nM	2	1	1922.91	1922.92	40S Ribosomal protein S21	cytoplasm	*	Ac-MQNDAGEFVDLYVPRK	c		Bortez/Cont=	2.30769	1.07692	1.38462	Cont/Cont=	1.07692	0.923077	1.58974	=Avg Bort/Cont (1h, 500nM)
HEK293T	bortezomib 1h, 500nM	2	2	1382.67	1382.64	Cytochrome c oxidase subunit 6b	mitochondria	*m	Ac-AEDMETKIKNY	k		Bortez/Cont=	1.75309	1.7284	1.55556	Cont/Cont=	1.01235	0.987654	1.67901	=Avg Bort/Cont (1h, 500nM)
HEK293T	bortezomib 1h, 500nM	2	1	2496.21	2496.22	Hepatitis B virus X-interacting protein	cytoplasm	*	Ac-MEATLEQHLEDTMKNPSIVGVL	c		Bortez/Cont=	2	1.2	2	Cont/Cont=	1.2	0.8	1.73333	=Avg Bort/Cont (1h, 500nM)
HEK293T	bortezomib 1h, 500nM	3	1	2496.19	2496.22	Hepatitis B virus X-interacting protein	cytoplasm	*	Ac-MEATLEQHLEDTMKNPSIVGVL	c		Bortez/Cont=	2	1.33333	2	Cont/Cont=	1	1	1.77778	=Avg Bort/Cont (1h, 500nM)
HEK293T	bortezomib 1h, 500nM	4	3	2837.62	2837.58	Histidine triad nucleotide-binding protein 1	cytoplasm	*m	Ac-ADEIAKAQVARPGGDTIFGKIIRKEI	p		Bortez/Cont=	2.0339	1.86441	1.86441	Cont/Cont=	1.15254	0.847458	1.9209	=Avg Bort/Cont (1h, 500nM)
HEK293T	bortezomib 1h, 500nM	2	1	2137.17	2137.16	Enhancer of rudimentary homolog	nucleus	*m	Ac-SHTILLVQPTKRPEGRTY	a		Bortez/Cont=	2.54545	1.81818	1.81818	Cont/Cont=	1.09091	0.909091	2.06061	=Avg Bort/Cont (1h, 500nM)
HEK293T	bortezomib 1h, 500nM	2	1	1399.75	1399.75	40S Ribosomal protein S28	cytoplasm	*	Ac-MDTSRVQPIKLA	r		Bortez/Cont=	2.72	1.92	1.8	Cont/Cont=	1	1	2.14667	=Avg Bort/Cont (1h, 500nM)
HEK293T	bortezomib 1h, 500nM	4	1	2137.15	2137.16	Enhancer of rudimentary homolog	nucleus	*m	Ac-SHTILLVQPTKRPEGRTY	a		Bortez/Cont=	2.58824	2	1.92157	Cont/Cont=	1.01961	0.980392	2.16993	=Avg Bort/Cont (1h, 500nM)
HEK293T	bortezomib 1h, 500nM	3	1	1706.93	1706.93	Heat shock 10kDa protein 1 (chaperonin 10)	mitochondria	*m	Ac-AGQAFRKFLPLFDR	v		Bortez/Cont=	2.5	2.125	2.08333	Cont/Cont=	0.958333	1.04167	2.23611	=Avg Bort/Cont (1h, 500nM)
HEK293T	bortezomib 1h, 500nM	3	1	2137.14	2137.16	Enhancer of rudimentary homolog	nucleus	*m	Ac-SHTILLVQPTKRPEGRTY	a		Bortez/Cont=	2.92	2.04	1.8	Cont/Cont=	1	1	2.25333	=Avg Bort/Cont (1h, 500nM)
HEK293T	bortezomib 1h, 500nM	2	1	1489.74	1489.75	Heterogeneous nuclear ribonucleoprotein F	nucleus	*m	Ac-MoxLGPEGGEGFVVKL	r		Bortez/Cont=	3.02326	2.09302	1.86047	Cont/Cont=	1.16279	0.837209	2.32558	=Avg Bort/Cont (1h, 500nM)
HEK293T	bortezomib 1h, 500nM	3	1	2872.42	2872.48	Macrophage migration inhibitory factor	cytoplasm	*m	PMFIVNTNVPRASVPDGFLSELTQQL	a		Bortez/Cont=	2.52632	2.89474	2.10526	Cont/Cont=	1.21053	0.789474	2.50877	=Avg Bort/Cont (1h, 500nM)
HEK293T	bortezomib 1h, 500nM	3	1	1433.82	1433.84	Enhancer of rudimentary homolog	nucleus	*m	Ac-SHTILLVQPTKR	p		Bortez/Cont=	2.88372	2.51163	2.13953	Cont/Cont=	1.02326	0.976744	2.51163	=Avg Bort/Cont (1h, 500nM)
HEK293T	bortezomib 1h, 500nM	2	1	1882.93	1882.92	Nuclear transport factor 2	cytoplasm	*m	Ac-GDKPIWEQIGSSFIQH	y		Bortez/Cont=	2.43243	2.7027	2.48649	Cont/Cont=	1.18919	0.810811	2.54054	=Avg Bort/Cont (1h, 500nM)
HEK293T	bortezomib 1h, 500nM	2	1	1433.82	1433.84	Enhancer of rudimentary homolog	nucleus	*m	Ac-SHTILLVQPTKR	p		Bortez/Cont=	3.19048	2.71429	2.33333	Cont/Cont=	1.04762	0.952381	2.74603	=Avg Bort/Cont (1h, 500nM)
HEK293T	bortezomib 1h, 500nM	2	1	1078.58	1078.59	Heat shock 10kDa protein 1 (chaperonin 10)	mitochondria	*m	Ac-AGQAFRKFL	p		Bortez/Cont=	3.35	2.75	2.75	Cont/Cont=	1	1	2.95	=Avg Bort/Cont (1h, 500nM)
HEK293T	bortezomib 1h, 500nM	2	1	1212.65	1212.65	Histidine triad nucleotide-binding protein 1	cytoplasm	*m	Ac-ADEIAKAQVAR	p		Bortez/Cont=	3.25	3	2.6	Cont/Cont=	1	1	2.95	=Avg Bort/Cont (1h, 500nM)
HEK293T	bortezomib 1h, 500nM	3	1	2110.09	2110.12	Methylosome subunit pICln (AltName: Chloride channel, nucleotide sensitive 1A)	nucleus	*m	Ac-SFLKSFPPPGPAEGLLRQQ	p		Bortez/Cont=	2.72727	3.18182	3.27273	Cont/Cont=	1.36364	0.636364	2.95455	=Avg Bort/Cont (1h, 500nM)
HEK293T	bortezomib 1h, 500nM	2	2	1287.67	1287.68	Eukaryotic translation elongation factor 1 beta	cytoplasm	*m	GFGDLKSPAGLQV	l		Bortez/Cont=	3.19048	2.7619	2.66667	Cont/Cont=	1.09524	0.904762	2.97619	=Avg Bort/Cont (1h, 500nM)
HEK293T	bortezomib 1h, 500nM	4	3	2595.46	2595.45	Histidine triad nucleotide-binding protein 1	cytoplasm	*m	ADEIAKAQVARPGGDTIFGKIIRK	e		Bortez/Cont=	3.40541	3.35135	3.24324	Cont/Cont=	1.08108	0.918919	3.33333	=Avg Bort/Cont (1h, 500nM)
HEK293T	bortezomib 1h, 500nM	5	3	2595.48	2595.45	Histidine triad nucleotide-binding protein 1	cytoplasm	*m	ADEIAKAQVARPGGDTIFGKIIRK	e		Bortez/Cont=	3.42857	3.42857	3.48571	Cont/Cont=	0.857143	1.14286	3.44762	=Avg Bort/Cont (1h, 500nM)
HEK293T	bortezomib 1h, 500nM	2	1	1550.82	1550.82	Heat shock 10kDa protein 1 (chaperonin 10)	mitochondria	*m	Ac-AGQAFRKFLPLFD	r		Bortez/Cont=	4.24242	3.15152	3.33333	Cont/Cont=	1.09091	0.909091	3.57576	=Avg Bort/Cont (1h, 500nM)
HEK293T	bortezomib 1h, 500nM	2	1	2110.09	2110.12	Methylosome subunit pICln (AltName: Chloride channel, nucleotide sensitive 1A)	nucleus	*m	Ac-SFLKSFPPPGPAEGLLRQQ	p		Bortez/Cont=	3.64706	4.70588	3.76471	Cont/Cont=	1.29412	0.705882	4.17647	=Avg Bort/Cont (1h, 500nM)
HEK293T	bortezomib 1h, 500nM	2	1	965.463	965.508	Heat shock 10kDa protein 1 (chaperonin 10)	mitochondria	*m	Ac-AGQAFRKF	l		Bortez/Cont=	>5	>5	>5	Cont/Cont=	nd	nd	>5	=Avg Bort/Cont (1h, 500nM)
HEK293T	bortezomib 1h, 500nM	1	1	965.528	965.508	Heat shock 10kDa protein 1 (chaperonin 10)	mitochondria	*m	Ac-AGQAFRKF	l		Bortez/Cont=	>5	>5	>5	Cont/Cont=	nd	nd	>5	=Avg Bort/Cont (1h, 500nM)
HEK293T	bortezomib 1h, 500nM	2	1	1944.97	1944.99	Peptidylprolyl isomerase A	cytoplasm	*m	VNPTVFFDIAVDGEPLGR	v		Bortez/Cont=	>5	>5	>5	Cont/Cont=	nd	nd	>5	=Avg Bort/Cont (1h, 500nM)
HEK293T	bortezomib 1h, 500nM	4	4	2820.49	2820.49	Thioredoxin	nucleus	*m	VKQIESKTAFQEALDAAGDKLVVVDF	s		Bortez/Cont=	>5	>5	>5	Cont/Cont=	nd	nd	>5	=Avg Bort/Cont (1h, 500nM)
HEK293T	bortezomib 1h, 500nM	5	3	2837.56	2837.58	Histidine triad nucleotide-binding protein 1	cytoplasm	*m	Ac-ADEIAKAQVARPGGDTIFGKIIRKEI	p		Bortez/Cont=	>5	>5	>5	Cont/Cont=	nd	nd	>5	=Avg Bort/Cont (1h, 500nM)
HEK293T	bortezomib 1h, 500nM	3	3	1148.66	1148.62	40S Ribosomal protein S21	cytoplasm	l	AKADGIVSKNF	*		Bortez/Cont=	0.588235	0.720588	0.676471	Cont/Cont=	1.11765	0.882353	0.661765	=Avg Bort/Cont (1h, 500nM)
HEK293T	bortezomib 1h, 500nM	2	3	1148.65	1148.62	40S Ribosomal protein S21	cytoplasm	l	AKADGIVSKNF	*		Bortez/Cont=	0.716667	0.7	0.666667	Cont/Cont=	1.16667	0.833333	0.694444	=Avg Bort/Cont (1h, 500nM)
HEK293T	bortezomib 1h, 500nM	4	4	3284.79	3284.73	Triosephosphate isomerase 1	cytoplasm	c	KELASQPDVDGFLVGGASLKPEFVDIINAKQ	*		Bortez/Cont=	0.741573	0.674157	0.47191	Cont/Cont=	1.2809	0.719101	0.707865	=Avg Bort/Cont (1h, 500nM)
HEK293T	bortezomib 1h, 500nM	3	3	1969.02	1968.95	Phosphatidylethanolamine-binding protein 1	cytoplasm	a	EWDDYVPKLYEQLSGK	*		Bortez/Cont=	1.03226	0.903226	0.666667	Cont/Cont=	1.11828	0.88172	0.967742	=Avg Bort/Cont (1h, 500nM)
HEK293T	bortezomib 1h, 500nM	4	3	2521.33	2521.3	40S Ribosomal protein S21	cytoplasm	r	RMGESDDSILRLAKADGIVSKNF	*		Bortez/Cont=	0.8	0.96	1.2	Cont/Cont=	1.2	0.8	0.986667	=Avg Bort/Cont (1h, 500nM)
HEK293T	bortezomib 1h, 500nM	2	2	1356.74	1356.71	Cytochrome c oxidase subunit 5a	mitochondria	l	GISTPEELGLDKV	*		Bortez/Cont=	1.03704	0.962963	1.08148	Cont/Cont=	1.06667	0.933333	1.02716	=Avg Bort/Cont (1h, 500nM)
HEK293T	bortezomib 1h, 500nM	4	3	2914.49	2914.51	Triosephosphate isomerase 1	cytoplasm	l	ASQPDVDGFLVGGASLKPEFVDIINAKQ	*		Bortez/Cont=	1.15789	1.11579	1.11579	Cont/Cont=	1.05263	0.947368	1.12982	=Avg Bort/Cont (1h, 500nM)
HEK293T	bortezomib 1h, 500nM	3	3	1620.87	1620.82	Eukaryotic translation initiation factor 5A	cytoplasm	l	SAMTEEAAVAIKAMAK	*		Bortez/Cont=	1.30841	1.25234	0.841121	Cont/Cont=	1.15888	0.841121	1.13396	=Avg Bort/Cont (1h, 500nM)
HEK293T	bortezomib 1h, 500nM	3	3	1462.81	1462.75	Eukaryotic translation initiation factor 5A	cytoplasm	a	MTEEAAVAIKAMAK	*		Bortez/Cont=	1.45946	1.40541	0.810811	Cont/Cont=	1.24324	0.756757	1.22523	=Avg Bort/Cont (1h, 500nM)
HEK293T	bortezomib 1h, 500nM	3	2	2180.16	2180.17	Cytochrome c oxidase subunit 5a	mitochondria	l	RPTLNELGISTPEELGLDKV	*		Bortez/Cont=	1.53061	1.36735	1.20408	Cont/Cont=	1.16327	0.836735	1.36735	=Avg Bort/Cont (1h, 500nM)
HEK293T	bortezomib 1h, 500nM	3	3	2365.22	2365.19	40S Ribosomal protein S21	cytoplasm	r	MGESDDSILRLAKADGIVSKNF	*		Bortez/Cont=	1.75	1.625	1.375	Cont/Cont=	1.125	0.875	1.58333	=Avg Bort/Cont (1h, 500nM)
HEK293T	bortezomib 1h, 500nM	4	3	2365.21	2365.19	40S Ribosomal protein S21	cytoplasm	r	MGESDDSILRLAKADGIVSKNF	*		Bortez/Cont=	1.71429	1.8	1.28571	Cont/Cont=	1.14286	0.857143	1.6	=Avg Bort/Cont (1h, 500nM)
HEK293T	bortezomib 1h, 500nM	3	3	2234.18	2234.15	40S Ribosomal protein S21	cytoplasm	m	GESDDSILRLAKADGIVSKNF	*		Bortez/Cont=	1.91781	1.78082	1.72603	Cont/Cont=	1.09589	0.90411	1.80822	=Avg Bort/Cont (1h, 500nM)
HEK293T	bortezomib 1h, 500nM	3	3	2914.53	2914.51	Triosephosphate isomerase 1	cytoplasm	l	ASQPDVDGFLVGGASLKPEFVDIINAKQ	*		Bortez/Cont=	1.96429	1.78571	1.35714	Cont/Cont=	1.25	0.75	1.875	=Avg Bort/Cont (1h, 500nM)
HEK293T	bortezomib 1h, 500nM	4	3	2234.19	2234.15	40S Ribosomal protein S21	cytoplasm	m	GESDDSILRLAKADGIVSKNF	*		Bortez/Cont=	2	1.84615	1.81538	Cont/Cont=	1.07692	0.923077	1.88718	=Avg Bort/Cont (1h, 500nM)
HEK293T	bortezomib 1h, 500nM	2	2	1203.72	1203.67	FK506 Binding Protein	cytoplasm	l	VFDVELLKLE	*		Bortez/Cont=	2.25806	2.09677	1.45161	Cont/Cont=	1.12903	0.870968	1.93548	=Avg Bort/Cont (1h, 500nM)
HEK293T	bortezomib 1h, 500nM	5	3	2521.34	2521.3	40S Ribosomal protein S21	cytoplasm	r	RMGESDDSILRLAKADGIVSKNF	*		Bortez/Cont=	2.15385	2.76923	2.30769	Cont/Cont=	1.07692	0.923077	2.41026	=Avg Bort/Cont (1h, 500nM)
HEK293T	bortezomib 1h, 500nM	2	2	949.527	949.487	40S Ribosomal protein S21	cytoplasm	k	ADGIVSKNF	*		Bortez/Cont=	3.11111	3.02222	2.57778	Cont/Cont=	1.06667	0.933333	2.9037	=Avg Bort/Cont (1h, 500nM)
HEK293T	bortezomib 1h, 500nM	4	3	2505.25	2505.24	Heat shock 10kDa protein 1 (chaperonin 10)	mitochondria	v	VLDDKDYFLFRDGDILGKYVD	*		Bortez/Cont=	3.15789	3.42105	2.42105	Cont/Cont=	1.05263	0.947368	3	=Avg Bort/Cont (1h, 500nM)
HEK293T	bortezomib 1h, 500nM	3	3	1077.6	1077.58	40S Ribosomal protein S21	cytoplasm	a	KADGIVSKNF	*		Bortez/Cont=	3.41463	2.92683	2.68293	Cont/Cont=	1.17073	0.829268	3.00813	=Avg Bort/Cont (1h, 500nM)
HEK293T	bortezomib 1h, 500nM	4	1	2012.06	2012.11	40S Ribosomal protein S28	cytoplasm	e	GDVLTLLESEREARRLR	*		Bortez/Cont=	5.12	4.4	4.56	Cont/Cont=	1.2	0.8	4.69333	=Avg Bort/Cont (1h, 500nM)
HEK293T	bortezomib 1h, 500nM	3	1	2012.08	2012.11	40S Ribosomal protein S28	cytoplasm	e	GDVLTLLESEREARRLR	*		Bortez/Cont=	5.84	4.4	4.4	Cont/Cont=	1.2	0.8	4.88	=Avg Bort/Cont (1h, 500nM)
HEK293T	bortezomib 1h, 500nM	2	2	842.546	842.511	FK506 Binding Protein	cytoplasm	d	VELLKLE	*		Bortez/Cont=	>5	>5	>5	Cont/Cont=	nd	nd	>5	=Avg Bort/Cont (1h, 500nM)
HEK293T	bortezomib 1h, 500nM	2	2	1128.67	1128.64	Thioredoxin	nucleus	e	KLEATINELV	*		Bortez/Cont=	>5	>5	>5	Cont/Cont=	nd	nd	>5	=Avg Bort/Cont (1h, 500nM)
HEK293T	bortezomib 1h, 500nM	5	1	2012.09	2012.11	40S Ribosomal protein S28	cytoplasm	e	GDVLTLLESEREARRLR	*		Bortez/Cont=	>5	>5	>5	Cont/Cont=	nd	nd	>5	=Avg Bort/Cont (1h, 500nM)
HEK293T	bortezomib 1h, 500nM	2	1	2012.1	2012.11	40S Ribosomal protein S28	cytoplasm	e	GDVLTLLESEREARRLR	*		Bortez/Cont=	>5	>5	>5	Cont/Cont=	nd	nd	>5	=Avg Bort/Cont (1h, 500nM)
HEK293T	bortezomib 1h, 500nM	3	2	2293.24	2293.25	Cytochrome c oxidase subunit 5a	mitochondria	e	LRPTLNELGISTPEELGLDKV	*		Bortez/Cont=	6.22222	6.22222	4.44444	Cont/Cont=	1.11111	0.888889	>5	=Avg Bort/Cont (1h, 500nM)
HEK293T	bortezomib 1h, 500nM	3	2	1249.63	1249.63	Heat shock 10kDa protein 1 (chaperonin 10)	mitochondria	f	RDGDILGKYVD	*		Bortez/Cont=	>5	>5	>5	Cont/Cont=	nd	nd	>5	=Avg Bort/Cont (1h, 500nM)
HEK293T	bortezomib 1h, 500nM	2	2	1249.66	1249.63	Heat shock 10kDa protein 1 (chaperonin 10)	mitochondria	f	RDGDILGKYVD	*		Bortez/Cont=	>5	>5	>5	Cont/Cont=	nd	nd	>5	=Avg Bort/Cont (1h, 500nM)
HEK293T	bortezomib 1h, 500nM	2	3	1292.75	1292.7	Complement component 1 Q subcomponent-binding protein, mitochondrial	mitochondria	f	LEDLKSFVKSQ	*		Bortez/Cont=	>5	>5	>5	Cont/Cont=	nd	nd	>5	=Avg Bort/Cont (1h, 500nM)
HEK293T	bortezomib 1h, 500nM	3	3	1292.76	1292.7	Complement component 1 Q subcomponent-binding protein, mitochondrial	mitochondria	f	LEDLKSFVKSQ	*		Bortez/Cont=	>5	>5	>5	Cont/Cont=	nd	nd	>5	=Avg Bort/Cont (1h, 500nM)
HEK293T	bortezomib 1h, 500nM	3	2	2016.03	2016.01	Nucleophosmin	nucleus	m	TDQEAIQDLWQWRKSL	*		Bortez/Cont=	>5	>5	>5	Cont/Cont=	nd	nd	>5	=Avg Bort/Cont (1h, 500nM)
HEK293T	bortezomib 1h, 500nM	2	1	1272.71	1272.71	Small nuclear ribonucleoprotein G-like protein	nucleus	n	SIIMLEALERV	*		Bortez/Cont=	>5	>5	>5	Cont/Cont=	nd	nd	>5	=Avg Bort/Cont (1h, 500nM)
HEK293T	bortezomib 1h, 500nM	2	2	1093.56	1093.53	Heat shock 10kDa protein 1 (chaperonin 10)	mitochondria	r	DGDILGKYVD	*		Bortez/Cont=	>5	>5	>5	Cont/Cont=	nd	nd	>5	=Avg Bort/Cont (1h, 500nM)
HEK293T	bortezomib 1h, 500nM	2	1	1443.76	1443.78	Small nuclear ribonucleoprotein G-like protein	nucleus	r	GNSIIMLEALERV	*		Bortez/Cont=	>5	>5	>5	Cont/Cont=	nd	nd	>5	=Avg Bort/Cont (1h, 500nM)
HEK293T	bortezomib 1h, 500nM	3	2	3015.43	3015.41	Deoxyuridine 5'-triphosphate nucleotidohydrolase, mitochondrial	mitochondria	r	IFYPEIEEVQALDDTERGSGGFGSTGKN	*		Bortez/Cont=	>5	>5	>5	Cont/Cont=	nd	nd	>5	=Avg Bort/Cont (1h, 500nM)
HEK293T	bortezomib 1h, 500nM	2	2	1007.53	1007.51	Eukaryotic translation elongation factor 1 beta	cytoplasm	s	MDVAAFNKI	*		Bortez/Cont=	>5	>5	>5	Cont/Cont=	nd	nd	>5	=Avg Bort/Cont (1h, 500nM)
HEK293T	bortezomib 1h, 500nM	2	2	1104.64	1104.61	FK506 Binding Protein	cytoplasm	v	FDVELLKLE	*		Bortez/Cont=	>5	>5	>5	Cont/Cont=	nd	nd	>5	=Avg Bort/Cont (1h, 500nM)
HEK293T	bortezomib 1h, 500nM	2	1	1728.75	1728.77	MAPK-interacting and spindle-stabilizing protein-like	cytoplasm	v	PSGPSGAPPMPGGPHSYH	*		Bortez/Cont=	7.5	6	5	Cont/Cont=	1	1	>5	=Avg Bort/Cont (1h, 500nM)
HEK293T	bortezomib 1h, 500nM	3	1	1728.78	1728.77	MAPK-interacting and spindle-stabilizing protein-like	cytoplasm	v	PSGPSGAPPMPGGPHSYH	*		Bortez/Cont=	>5	>5	>5	Cont/Cont=	nd	nd	>5	=Avg Bort/Cont (1h, 500nM)
HEK293T	bortezomib 1h, 500nM	4	3	2406.21	2406.17	Heat shock 10kDa protein 1 (chaperonin 10)	mitochondria	v	LDDKDYFLFRDGDILGKYVD	*		Bortez/Cont=	>5	>5	>5	Cont/Cont=	nd	nd	>5	=Avg Bort/Cont (1h, 500nM)
HEK293T	bortezomib 1h, 500nM	3	3	2406.21	2406.17	Heat shock 10kDa protein 1 (chaperonin 10)	mitochondria	v	LDDKDYFLFRDGDILGKYVD	*		Bortez/Cont=	>5	>5	>5	Cont/Cont=	nd	nd	>5	=Avg Bort/Cont (1h, 500nM)
HEK293T	bortezomib 1h, 500nM	3	3	2505.28	2505.24	Heat shock 10kDa protein 1 (chaperonin 10)	mitochondria	v	VLDDKDYFLFRDGDILGKYVD	*		Bortez/Cont=	>5	>5	>5	Cont/Cont=	nd	nd	>5	=Avg Bort/Cont (1h, 500nM)
HEK293T	bortezomib 1h, 500nM	3	2	2469.35	2469.33	Far upstream element-binding protein 2	nucleus	c	GLVIGRGGENVKAINQQTGAFVEI	s		Bortez/Cont=	0.123711	0.309278	0.371134	Cont/Cont=	1.13402	0.865979	0.216495	=Avg Bort/Cont (1h, 500nM)
HEK293T	bortezomib 1h, 500nM	4	4	1713.02	1712.98	Triosephosphate isomerase 1	cytoplasm	t	KVIADNVKDWSKVVL	a		Bortez/Cont=	0.42963	0.414815	0.37037	Cont/Cont=	1.11111	0.888889	0.404938	=Avg Bort/Cont (1h, 500nM)
HEK293T	bortezomib 1h, 500nM	3	4	1713.03	1712.98	Triosephosphate isomerase 1	cytoplasm	t	KVIADNVKDWSKVVL	a		Bortez/Cont=	0.538462	0.384615	0.307692	Cont/Cont=	1.15385	0.846154	0.410256	=Avg Bort/Cont (1h, 500nM)
HEK293T	bortezomib 1h, 500nM	5	3	3175.68	3175.67	Peptidylprolyl isomerase A	cytoplasm	i	AVDGEPLGRVSFELFADKVPKTAENFRAL	s		Bortez/Cont=	0.428571	0.47619	0.47619	Cont/Cont=	1.2381	0.761905	0.460317	=Avg Bort/Cont (1h, 500nM)
HEK293T	bortezomib 1h, 500nM	2	1	1634.84	1634.83	Peptidylprolyl isomerase A	cytoplasm	i	AVDGEPLGRVSFELF	a		Bortez/Cont=	0.495238	0.533333	0.457143	Cont/Cont=	1.06667	0.933333	0.514286	=Avg Bort/Cont (1h, 500nM)
HEK293T	bortezomib 1h, 500nM	2	1	1254.74	1254.73	Far upstream element-binding protein 2	nucleus	a	ARIINDLLQSL	r		Bortez/Cont=	0.6	0.56	0.52	Cont/Cont=	1.2	0.8	0.56	=Avg Bort/Cont (1h, 500nM)
HEK293T	bortezomib 1h, 500nM	2	1	1245.66	1245.64	Peptidylprolyl isomerase A	cytoplasm	i	AVDGEPLGRVSF	e		Bortez/Cont=	0.779661	0.779661	0.677966	Cont/Cont=	1.08475	0.915254	0.745763	=Avg Bort/Cont (1h, 500nM)
HEK293T	bortezomib 1h, 500nM	3	2	1899.97	1899.94	Peptidylprolyl isomerase A	cytoplasm	f	EDENFILKHTGPGILSM	a		Bortez/Cont=	0.785714	0.732143	0.5	Cont/Cont=	1.23214	0.767857	0.758929	=Avg Bort/Cont (1h, 500nM)
HEK293T	bortezomib 1h, 500nM	2	2	1899.97	1899.94	Peptidylprolyl isomerase A	cytoplasm	f	EDENFILKHTGPGILSM	a		Bortez/Cont=	0.980392	0.901961	0.705882	Cont/Cont=	1.21569	0.784314	0.862745	=Avg Bort/Cont (1h, 500nM)
HEK293T	bortezomib 1h, 500nM	2	2	1039.58	1039.55	Peptidylprolyl isomerase A	cytoplasm	l	KHTGPGILSM	a		Bortez/Cont=	0.977273	1.13636	0.5	Cont/Cont=	1.20455	0.795455	0.871212	=Avg Bort/Cont (1h, 500nM)
HEK293T	bortezomib 1h, 500nM	3	2	1476.83	1476.77	Triosephosphate isomerase 1	cytoplasm	c	APPTAYIDFARQK	l		Bortez/Cont=	0.923077	0.923077	0.815385	Cont/Cont=	1.07692	0.923077	0.887179	=Avg Bort/Cont (1h, 500nM)
HEK293T	bortezomib 1h, 500nM	2	1	1473.78	1473.75	Peptidylprolyl isomerase A	cytoplasm	f	DIAVDGEPLGRVSF	e		Bortez/Cont=	0.930233	1.02326	0.930233	Cont/Cont=	0.837209	1.16279	0.96124	=Avg Bort/Cont (1h, 500nM)
HEK293T	bortezomib 1h, 500nM	4	2	2229.21	2229.15	FK506 Binding Protein	cytoplasm	m	GVQVETISPGDGRTFPKRGQT	c		Bortez/Cont=	0.952381	1	1.19048	Cont/Cont=	1.2381	0.761905	1.04762	=Avg Bort/Cont (1h, 500nM)
HEK293T	bortezomib 1h, 500nM	2	2	1667.93	1667.91	Phosphatidylethanolamine-binding protein 1	cytoplasm	y	AGAAVDELGKVLTPTQV	k		Bortez/Cont=	1.14563	1.08738	0.815534	Cont/Cont=	1.28155	0.718447	1.1165	=Avg Bort/Cont (1h, 500nM)
HEK293T	bortezomib 1h, 500nM	2	2	1814.96	1814.97	60S acidic ribosomal protein P1	cytoplasm	a	AGVNVEPFWPGLFAKAL	a		Bortez/Cont=	1.18182	1.36364	0.909091	Cont/Cont=	1.18182	0.818182	1.15152	=Avg Bort/Cont (1h, 500nM)
HEK293T	bortezomib 1h, 500nM	4	1	2718.37	2718.36	Protein SET (Phosphatase 2A inhibitor I2PP2A)	cytoplasm	f	VNHPQVSALLGEEDEEALHYLTRV	e		Bortez/Cont=	1.42857	1.14286	1.02857	Cont/Cont=	0.857143	1.14286	1.2	=Avg Bort/Cont (1h, 500nM)
HEK293T	bortezomib 1h, 500nM	2	1	871.499	871.476	Splicing factor, arginine/serine-rich 1	cytoplasm	y	GAIRDIDL	k		Bortez/Cont=	1.14286	1.71429	0.971429	Cont/Cont=	0.971429	1.02857	1.27619	=Avg Bort/Cont (1h, 500nM)
HEK293T	bortezomib 1h, 500nM	4	3	1558.92	1558.85	Peptidylprolyl isomerase A	cytoplasm	f	ADKVPKTAENFRAL	s		Bortez/Cont=	1.90769	1.56923	1.23077	Cont/Cont=	1.13846	0.861538	1.56923	=Avg Bort/Cont (1h, 500nM)
HEK293T	bortezomib 1h, 500nM	2	1	1086.58	1086.59	Triosephosphate isomerase 1	cytoplasm	q	SLGELIGTLNA	a		Bortez/Cont=	2.03226	1.77419	1.03226	Cont/Cont=	1.29032	0.709677	1.6129	=Avg Bort/Cont (1h, 500nM)
HEK293T	bortezomib 1h, 500nM	3	2	2882.38	2882.38	Acidic nuclear phosphoprotein pp32	nucleus	l	VLDNSRSNEGKLEGLTDEFEELEFL	s		Bortez/Cont=	1.78947	1.73684	1.36842	Cont/Cont=	1.05263	0.947368	1.63158	=Avg Bort/Cont (1h, 500nM)
HEK293T	bortezomib 1h, 500nM	2	3	1558.92	1558.85	Peptidylprolyl isomerase A	cytoplasm	f	ADKVPKTAENFRAL	s		Bortez/Cont=	1.8961	1.55844	1.50649	Cont/Cont=	1.22078	0.779221	1.65368	=Avg Bort/Cont (1h, 500nM)
HEK293T	bortezomib 1h, 500nM	3	3	1558.91	1558.85	Peptidylprolyl isomerase A	cytoplasm	f	ADKVPKTAENFRAL	s		Bortez/Cont=	1.78313	1.73494	1.46988	Cont/Cont=	1.15663	0.843373	1.66265	=Avg Bort/Cont (1h, 500nM)
HEK293T	bortezomib 1h, 500nM	3	2	1524.94	1524.9	Nucleophosmin	nucleus	l	GGFEITPPVVLRLK	c		Bortez/Cont=	1.86667	1.73333	1.70667	Cont/Cont=	1.14667	0.853333	1.76889	=Avg Bort/Cont (1h, 500nM)
HEK293T	bortezomib 1h, 500nM	2	2	1138.63	1138.63	Triosephosphate isomerase 1	cytoplasm	k	LDPKIAVAAQN	c		Bortez/Cont=	1.90476	1.52381	1.90476	Cont/Cont=	1.2381	0.761905	1.77778	=Avg Bort/Cont (1h, 500nM)
HEK293T	bortezomib 1h, 500nM	2	2	825.534	825.496	Triosephosphate isomerase 1	cytoplasm	k	LDPKIAVA	a		Bortez/Cont=	2.27273	2.27273	1.45455	Cont/Cont=	1.09091	0.909091	2	=Avg Bort/Cont (1h, 500nM)
HEK293T	bortezomib 1h, 500nM	2	2	1743.95	1743.93	60S acidic ribosomal protein P1	cytoplasm	a	GVNVEPFWPGLFAKAL	a		Bortez/Cont=	2.14815	2.22222	1.85185	Cont/Cont=	0.962963	1.03704	2.07407	=Avg Bort/Cont (1h, 500nM)
HEK293T	bortezomib 1h, 500nM	2	1	1856.96	1856.96	Macrophage migration inhibitory factor	cytoplasm	v	PRASVPDGFLSELTQQL	a		Bortez/Cont=	2.88889	2.44444	1.91111	Cont/Cont=	0.666667	1.33333	2.41481	=Avg Bort/Cont (1h, 500nM)
HEK293T	bortezomib 1h, 500nM	3	2	2480.29	2480.29	Macrophage migration inhibitory factor	cytoplasm	l	AQATGKPPQYIAVHVVPDQLMAF	g		Bortez/Cont=	2.85714	2.38095	2.38095	Cont/Cont=	1.04762	0.952381	2.53968	=Avg Bort/Cont (1h, 500nM)
HEK293T	bortezomib 1h, 500nM	3	1	2368.14	2368.19	Protein SET (Phosphatase 2A inhibitor I2PP2A)	cytoplasm	f	PQVSALLGEEDEEALHYLTRV	e		Bortez/Cont=	2.4	2.85714	2.34286	Cont/Cont=	0.857143	1.14286	2.62857	=Avg Bort/Cont (1h, 500nM)
HEK293T	bortezomib 1h, 500nM	2	2	1406.74	1406.73	Histidine triad nucleotide-binding protein 1	cytoplasm	c	AADLGLNKGYRMV	v		Bortez/Cont=	2.92	2.8	2.72	Cont/Cont=	1	1	2.81333	=Avg Bort/Cont (1h, 500nM)
HEK293T	bortezomib 1h, 500nM	3	1	1082.63	1082.66	Vimentin	cytoplasm	l	RSSVPGVRLL	q		Bortez/Cont=	3.11111	3.22222	2.22222	Cont/Cont=	1.11111	0.888889	2.85185	=Avg Bort/Cont (1h, 500nM)
HEK293T	bortezomib 1h, 500nM	2	2	1442.72	1442.74	60S acidic ribosomal protein P2	cytoplasm	s	VGIEADDDRLNKV	i		Bortez/Cont=	3.5	3	2.55	Cont/Cont=	0.75	1.25	3.01667	=Avg Bort/Cont (1h, 500nM)
HEK293T	bortezomib 1h, 500nM	3	2	2131.16	2131.14	Macrophage migration inhibitory factor	cytoplasm	l	AQATGKPPQYIAVHVVPDQL	m		Bortez/Cont=	3.78947	2.89474	2.78947	Cont/Cont=	1.05263	0.947368	3.15789	=Avg Bort/Cont (1h, 500nM)
HEK293T	bortezomib 1h, 500nM	3	1	2619.3	2619.29	Protein SET (Phosphatase 2A inhibitor I2PP2A)	cytoplasm	f	VNHPQVSALLGEEDEEALHYLTR	v		Bortez/Cont=	3.82857	3.42857	2.28571	Cont/Cont=	1.14286	0.857143	3.18095	=Avg Bort/Cont (1h, 500nM)
HEK293T	bortezomib 1h, 500nM	2	3	1655.96	1655.88	Heat shock 10kDa protein 1 (chaperonin 10)	mitochondria	v	AVGSGSKGKGGEIQPVSV	k		Bortez/Cont=	4.34286	3.42857	2.85714	Cont/Cont=	1.14286	0.857143	3.54286	=Avg Bort/Cont (1h, 500nM)
HEK293T	bortezomib 1h, 500nM	3	3	1480.94	1480.9	Acidic nuclear phosphoprotein pp32	nucleus	v	GLTSIANLPKLNKL	k		Bortez/Cont=	3.75	3.75	3.625	Cont/Cont=	1.25	0.75	3.70833	=Avg Bort/Cont (1h, 500nM)
HEK293T	bortezomib 1h, 500nM	3	3	1655.89	1655.88	Heat shock 10kDa protein 1 (chaperonin 10)	mitochondria	v	AVGSGSKGKGGEIQPVSV	k		Bortez/Cont=	4.28571	3.77143	3.2	Cont/Cont=	1.14286	0.857143	3.75238	=Avg Bort/Cont (1h, 500nM)
HEK293T	bortezomib 1h, 500nM	3	2	1785.93	1785.91	60S acidic ribosomal protein P2	cytoplasm	v	GIEADDDRLNKVISEL	n		Bortez/Cont=	4.48276	3.7931	3.44828	Cont/Cont=	1.03448	0.965517	4.13793	=Avg Bort/Cont (1h, 500nM)
HEK293T	bortezomib 1h, 500nM	3	2	1406.74	1406.73	Histidine triad nucleotide-binding protein 1	cytoplasm	c	AADLGLNKGYRMV	v		Bortez/Cont=	4.3125	4.375	3.9375	Cont/Cont=	1.0625	0.9375	4.20833	=Avg Bort/Cont (1h, 500nM)
HEK293T	bortezomib 1h, 500nM	2	2	1785.93	1785.91	60S acidic ribosomal protein P2	cytoplasm	v	GIEADDDRLNKVISEL	n		Bortez/Cont=	5.41667	3.75	3.08333	Cont/Cont=	1.08333	0.916667	4.58333	=Avg Bort/Cont (1h, 500nM)
HEK293T	bortezomib 1h, 500nM	3	2	1269.75	1269.71	Splicing factor, arginine/serine-rich 1	cytoplasm	y	GAIRDIDLKNR	r		Bortez/Cont=	4.70968	4.64516	4.51613	Cont/Cont=	1.03226	0.967742	4.62366	=Avg Bort/Cont (1h, 500nM)
HEK293T	bortezomib 1h, 500nM	2	2	1524.86	1524.86	Peroxiredoxin 5	mitochondria	m	APIKVGDAIPAVEVF	e		Bortez/Cont=	<0.2	<0.2	<0.2	Cont/Cont=	1.16031	0.839695	<0.2	=Avg Bort/Cont (1h, 500nM)
HEK293T	bortezomib 1h, 500nM	2	2	1559.84	1559.81	60S acidic ribosomal protein P1	cytoplasm	a	GVNVEPFWPGLFAK	a		Bortez/Cont=	>5	>5	>5	Cont/Cont=	nd	nd	>5	=Avg Bort/Cont (1h, 500nM)
HEK293T	bortezomib 1h, 500nM	2	2	1061.6	1061.57	60S acidic ribosomal protein P1	cytoplasm	e	PFWPGLFAK	a		Bortez/Cont=	>5	>5	>5	Cont/Cont=	nd	nd	>5	=Avg Bort/Cont (1h, 500nM)
HEK293T	bortezomib 1h, 500nM	3	3	1496.91	1496.86	60S acidic ribosomal protein P2	cytoplasm	g	KNIEDVIAQGIGKL	a		Bortez/Cont=	>5	>5	>5	Cont/Cont=	nd	nd	>5	=Avg Bort/Cont (1h, 500nM)
HEK293T	bortezomib 1h, 500nM	3	3	1802.01	1801.93	60S acidic ribosomal protein P1	cytoplasm	h	DDEVTVTEDKINALIK	a		Bortez/Cont=	>5	>5	>5	Cont/Cont=	nd	nd	>5	=Avg Bort/Cont (1h, 500nM)
HEK293T	bortezomib 1h, 500nM	2	1	2384.16	2384.23	Macrophage migration inhibitory factor	cytoplasm	i	VNTNVPRASVPDGFLSELTQQL	a		Bortez/Cont=	>5	>5	>5	Cont/Cont=	nd	nd	>5	=Avg Bort/Cont (1h, 500nM)
HEK293T	bortezomib 1h, 500nM	3	1	2384.19	2384.23	Macrophage migration inhibitory factor	cytoplasm	i	VNTNVPRASVPDGFLSELTQQL	a		Bortez/Cont=	>5	>5	>5	Cont/Cont=	nd	nd	>5	=Avg Bort/Cont (1h, 500nM)
HEK293T	bortezomib 1h, 500nM	2	2	1099.59	1099.57	Heterogeneous nuclear ribonucleoprotein D-like	nucleus	r	GFGFVLFKDA	a		Bortez/Cont=	>5	>5	>5	Cont/Cont=	nd	nd	>5	=Avg Bort/Cont (1h, 500nM)
HEK293T	bortezomib 1h, 500nM	2	1	1445.72	1445.74	Macrophage migration inhibitory factor	cytoplasm	s	VPDGFLSELTQQL	a		Bortez/Cont=	>5	>5	>5	Cont/Cont=	nd	nd	>5	=Avg Bort/Cont (1h, 500nM)
HEK293T	bortezomib 1h, 500nM	2	1	1346.67	1346.67	Macrophage migration inhibitory factor	cytoplasm	v	PDGFLSELTQQL	a		Bortez/Cont=	>5	>5	>5	Cont/Cont=	nd	nd	>5	=Avg Bort/Cont (1h, 500nM)
HEK293T	bortezomib 1h, 500nM	2	2	1374.75	1374.73	60S acidic ribosomal protein P1	cytoplasm	v	EPFWPGLFAKAL	a		Bortez/Cont=	>5	>5	>5	Cont/Cont=	nd	nd	>5	=Avg Bort/Cont (1h, 500nM)
HEK293T	bortezomib 1h, 500nM	2	1	1236.59	1236.58	Complement component 1 Q subcomponent-binding protein, mitochondrial	mitochondria	w	ALYDHLMDFL	a		Bortez/Cont=	>5	>5	>5	Cont/Cont=	nd	nd	>5	=Avg Bort/Cont (1h, 500nM)
HEK293T	bortezomib 1h, 500nM	2	2	709.425	709.401	Macrophage migration inhibitory factor	cytoplasm	r	SYSKLL	c		Bortez/Cont=	>5	>5	>5	Cont/Cont=	nd	nd	>5	=Avg Bort/Cont (1h, 500nM)
HEK293T	bortezomib 1h, 500nM	3	3	1705.82	1705.75	Eukaryotic translation elongation factor 1 beta	cytoplasm	v	KPWDDETDMAKLEE	c		Bortez/Cont=	>5	>5	>5	Cont/Cont=	nd	nd	>5	=Avg Bort/Cont (1h, 500nM)
HEK293T	bortezomib 1h, 500nM	1	1	773.384	773.375	Heterogeneous nuclear ribonucleoproteins A2/B1 (the motif GFGFVTF is also found in several other proteins!!!)	nucleus	r	GFGFVTF	d		Bortez/Cont=	>5	>5	>5	Cont/Cont=	nd	nd	>5	=Avg Bort/Cont (1h, 500nM)
HEK293T	bortezomib 1h, 500nM	2	2	1330.69	1330.66	Heat shock 10kDa protein 1 (chaperonin 10)	mitochondria	v	LDDKDYFLFR	d		Bortez/Cont=	>5	>5	>5	Cont/Cont=	nd	nd	>5	=Avg Bort/Cont (1h, 500nM)
HEK293T	bortezomib 1h, 500nM	3	2	1330.71	1330.66	Heat shock 10kDa protein 1 (chaperonin 10)	mitochondria	v	LDDKDYFLFR	d		Bortez/Cont=	>5	>5	>5	Cont/Cont=	nd	nd	>5	=Avg Bort/Cont (1h, 500nM)
HEK293T	bortezomib 1h, 500nM	3	2	1429.75	1429.72	Heat shock 10kDa protein 1 (chaperonin 10)	mitochondria	v	VLDDKDYFLFR	d		Bortez/Cont=	>5	>5	>5	Cont/Cont=	nd	nd	>5	=Avg Bort/Cont (1h, 500nM)
HEK293T	bortezomib 1h, 500nM	3	2	2333.22	2333.22	Macrophage migration inhibitory factor	cytoplasm	l	AQATGKPPQYIAVHVVPDQLMA	f		Bortez/Cont=	>5	>5	>5	Cont/Cont=	nd	nd	>5	=Avg Bort/Cont (1h, 500nM)
HEK293T	bortezomib 1h, 500nM	2	2	2333.23	2333.22	Macrophage migration inhibitory factor	cytoplasm	l	AQATGKPPQYIAVHVVPDQLMA	f		Bortez/Cont=	>5	>5	>5	Cont/Cont=	nd	nd	>5	=Avg Bort/Cont (1h, 500nM)
HEK293T	bortezomib 1h, 500nM	2	2	1186.67	1186.63	40S Ribosomal protein S21	cytoplasm	m	NVAEVDKVTGR	f		Bortez/Cont=	>5	>5	>5	Cont/Cont=	nd	nd	>5	=Avg Bort/Cont (1h, 500nM)
HEK293T	bortezomib 1h, 500nM	3	2	1186.67	1186.63	40S Ribosomal protein S21	cytoplasm	m	NVAEVDKVTGR	f		Bortez/Cont=	>5	>5	>5	Cont/Cont=	nd	nd	>5	=Avg Bort/Cont (1h, 500nM)
HEK293T	bortezomib 1h, 500nM	2	2	861.54	861.496	Eukaryotic translation elongation factor 1 beta	cytoplasm	s	SKLVPVGY	g		Bortez/Cont=	>5	>5	>5	Cont/Cont=	nd	nd	>5	=Avg Bort/Cont (1h, 500nM)
HEK293T	bortezomib 1h, 500nM	2	2	1342.75	1342.72	Macrophage migration inhibitory factor	cytoplasm	l	AQATGKPPQYIAV	h		Bortez/Cont=	>5	>5	>5	Cont/Cont=	nd	nd	>5	=Avg Bort/Cont (1h, 500nM)
HEK293T	bortezomib 1h, 500nM	3	3	1546.91	1546.86	Vimentin	cytoplasm	v	ESLQEEIAFLKKL	h		Bortez/Cont=	>5	>5	>5	Cont/Cont=	nd	nd	>5	=Avg Bort/Cont (1h, 500nM)
HEK293T	bortezomib 1h, 500nM	2	1	1004.55	1004.53	Histone H2B	nucleus	f	VNDIFERI	i		Bortez/Cont=	>5	>5	>5	Cont/Cont=	nd	nd	>5	=Avg Bort/Cont (1h, 500nM)
HEK293T	bortezomib 1h, 500nM	3	2	1757.9	1757.88	60S acidic ribosomal protein P2	cytoplasm	i	LDSVGIEADDDRLNKV	i		Bortez/Cont=	>5	>5	>5	Cont/Cont=	nd	nd	>5	=Avg Bort/Cont (1h, 500nM)
HEK293T	bortezomib 1h, 500nM	2	2	2185.07	2185.03	Acidic nuclear phosphoprotein pp32	nucleus	n	EGKLEGLTDEFEELEFLST	i		Bortez/Cont=	>5	>5	>5	Cont/Cont=	nd	nd	>5	=Avg Bort/Cont (1h, 500nM)
HEK293T	bortezomib 1h, 500nM	3	2	1442.77	1442.74	60S acidic ribosomal protein P2	cytoplasm	s	VGIEADDDRLNKV	i		Bortez/Cont=	>5	>5	>5	Cont/Cont=	nd	nd	>5	=Avg Bort/Cont (1h, 500nM)
HEK293T	bortezomib 1h, 500nM	2	2	782.474	782.433	Nucleophosmin	nucleus	a	KFINYV	k		Bortez/Cont=	>5	>5	>5	Cont/Cont=	nd	nd	>5	=Avg Bort/Cont (1h, 500nM)
HEK293T	bortezomib 1h, 500nM	2	2	972.571	972.549	Heterogeneous nuclear ribonucleoprotein D-like	nucleus	a	ASVDKVLEL	k		Bortez/Cont=	>5	>5	>5	Cont/Cont=	nd	nd	>5	=Avg Bort/Cont (1h, 500nM)
HEK293T	bortezomib 1h, 500nM	3	3	1584.83	1584.85	Heat shock 10kDa protein 1 (chaperonin 10)	mitochondria	a	VGSGSKGKGGEIQPVSV	k		Bortez/Cont=	>5	>5	>5	Cont/Cont=	nd	nd	>5	=Avg Bort/Cont (1h, 500nM)
HEK293T	bortezomib 1h, 500nM	3	3	1955.07	1955.07	Heat shock 10kDa protein 1 (chaperonin 10)	mitochondria	a	TVVAVGSGSKGKGGEIQPVSV	k		Bortez/Cont=	6.52174	5.47826	3.56522	Cont/Cont=	1.13043	0.869565	>5	=Avg Bort/Cont (1h, 500nM)
HEK293T	bortezomib 1h, 500nM	3	2	2027.04	2026.99	Histidine triad nucleotide-binding protein 1	cytoplasm	i	SVAEDDDESLLGHLMIVGK	k		Bortez/Cont=	>5	>5	>5	Cont/Cont=	nd	nd	>5	=Avg Bort/Cont (1h, 500nM)
HEK293T	bortezomib 1h, 500nM	2	2	856.504	856.465	Nucleophosmin	nucleus	k	GGSLPKVEA	k		Bortez/Cont=	>5	>5	>5	Cont/Cont=	nd	nd	>5	=Avg Bort/Cont (1h, 500nM)
HEK293T	bortezomib 1h, 500nM	3	3	1384.8	1384.76	Nucleophosmin	nucleus	q	ASIEKGGSLPKVEA	k		Bortez/Cont=	>5	>5	>5	Cont/Cont=	nd	nd	>5	=Avg Bort/Cont (1h, 500nM)
HEK293T	bortezomib 1h, 500nM	2	3	1384.8	1384.76	Nucleophosmin	nucleus	q	ASIEKGGSLPKVEA	k		Bortez/Cont=	>5	>5	>5	Cont/Cont=	nd	nd	>5	=Avg Bort/Cont (1h, 500nM)
HEK293T	bortezomib 1h, 500nM	2	2	955.611	955.57	Barrier to autointegration factor 1	nucleus	s	LAGIGEVLGK	k		Bortez/Cont=	>5	>5	>5	Cont/Cont=	nd	nd	>5	=Avg Bort/Cont (1h, 500nM)
HEK293T	bortezomib 1h, 500nM	3	3	1485.79	1485.78	Heat shock 10kDa protein 1 (chaperonin 10)	mitochondria	v	GSGSKGKGGEIQPVSV	k		Bortez/Cont=	5.56522	5.65217	6.52174	Cont/Cont=	1.04348	0.956522	>5	=Avg Bort/Cont (1h, 500nM)
HEK293T	bortezomib 1h, 500nM	2	3	1485.82	1485.78	Heat shock 10kDa protein 1 (chaperonin 10)	mitochondria	v	GSGSKGKGGEIQPVSV	k		Bortez/Cont=	8.11111	7.88889	8.55556	Cont/Cont=	1.11111	0.888889	>5	=Avg Bort/Cont (1h, 500nM)
HEK293T	bortezomib 1h, 500nM	3	4	1513.92	1513.85	60S acidic ribosomal protein P2	cytoplasm	a	LGGNSSPSAKDIKKI	l		Bortez/Cont=	>5	>5	>5	Cont/Cont=	nd	nd	>5	=Avg Bort/Cont (1h, 500nM)
HEK293T	bortezomib 1h, 500nM	4	4	1584.9	1584.88	60S acidic ribosomal protein P2	cytoplasm	a	ALGGNSSPSAKDIKKI	l		Bortez/Cont=	>5	>5	>5	Cont/Cont=	nd	nd	>5	=Avg Bort/Cont (1h, 500nM)
HEK293T	bortezomib 1h, 500nM	3	4	1584.96	1584.88	60S acidic ribosomal protein P2	cytoplasm	a	ALGGNSSPSAKDIKKI	l		Bortez/Cont=	>5	>5	>5	Cont/Cont=	nd	nd	>5	=Avg Bort/Cont (1h, 500nM)
HEK293T	bortezomib 1h, 500nM	2	1	858.521	858.496	Heat shock 10kDa protein 1 (chaperonin 10)	mitochondria	f	LPLFDRV	l		Bortez/Cont=	>5	>5	>5	Cont/Cont=	nd	nd	>5	=Avg Bort/Cont (1h, 500nM)
HEK293T	bortezomib 1h, 500nM	3	2	2087.05	2087.04	60S acidic ribosomal protein P2	cytoplasm	i	LDSVGIEADDDRLNKVISE	l		Bortez/Cont=	>5	>5	>5	Cont/Cont=	nd	nd	>5	=Avg Bort/Cont (1h, 500nM)
HEK293T	bortezomib 1h, 500nM	4	4	1655.97	1655.92	60S acidic ribosomal protein P2	cytoplasm	l	AALGGNSSPSAKDIKKI	l		Bortez/Cont=	>5	>5	>5	Cont/Cont=	nd	nd	>5	=Avg Bort/Cont (1h, 500nM)
HEK293T	bortezomib 1h, 500nM	3	4	1656.01	1655.92	60S acidic ribosomal protein P2	cytoplasm	l	AALGGNSSPSAKDIKKI	l		Bortez/Cont=	>5	>5	>5	Cont/Cont=	nd	nd	>5	=Avg Bort/Cont (1h, 500nM)
HEK293T	bortezomib 1h, 500nM	4	4	2203.26	2203.22	60S acidic ribosomal protein P2	cytoplasm	v	ASYLLAALGGNSSPSAKDIKKI	l		Bortez/Cont=	>5	>5	>5	Cont/Cont=	nd	nd	>5	=Avg Bort/Cont (1h, 500nM)
HEK293T	bortezomib 1h, 500nM	3	4	2203.33	2203.22	60S acidic ribosomal protein P2	cytoplasm	v	ASYLLAALGGNSSPSAKDIKKI	l		Bortez/Cont=	>5	>5	>5	Cont/Cont=	nd	nd	>5	=Avg Bort/Cont (1h, 500nM)
HEK293T	bortezomib 1h, 500nM	2	2	1996.95	1996.9	Acyl carrier protein, mitochondrial	mitochondria	a	MEDEFGFEIPDIDAEKL	m		Bortez/Cont=	>5	>5	>5	Cont/Cont=	nd	nd	>5	=Avg Bort/Cont (1h, 500nM)
HEK293T	bortezomib 1h, 500nM	3	2	2200.12	2200.12	60S acidic ribosomal protein P2	cytoplasm	i	LDSVGIEADDDRLNKVISEL	n		Bortez/Cont=	>5	>5	>5	Cont/Cont=	nd	nd	>5	=Avg Bort/Cont (1h, 500nM)
HEK293T	bortezomib 1h, 500nM	4	3	2104.17	2104.08	40S Ribosomal protein S21	cytoplasm	r	MGESDDSILRLAKADGIVSK	n		Bortez/Cont=	>5	>5	>5	Cont/Cont=	nd	nd	>5	=Avg Bort/Cont (1h, 500nM)
HEK293T	bortezomib 1h, 500nM	2	2	1159.62	1159.62	Eukaryotic translation elongation factor 1 beta	cytoplasm	a	DGLVWGSSKLV	p		Bortez/Cont=	>5	>5	>5	Cont/Cont=	nd	nd	>5	=Avg Bort/Cont (1h, 500nM)
HEK293T	bortezomib 1h, 500nM	3	1	1688.88	1688.88	Histone H2B	nucleus	f	VNDIFERIAGEASRL	p		Bortez/Cont=	>5	>5	>5	Cont/Cont=	nd	nd	>5	=Avg Bort/Cont (1h, 500nM)
HEK293T	bortezomib 1h, 500nM	2	1	1055.6	1055.57	Macrophage migration inhibitory factor	cytoplasm	i	VNTNVPRASV	p		Bortez/Cont=	>5	>5	>5	Cont/Cont=	nd	nd	>5	=Avg Bort/Cont (1h, 500nM)
HEK293T	bortezomib 1h, 500nM	2	2	743.471	743.454	60S acidic ribosomal protein P2	cytoplasm	q	GIGKLASV	p		Bortez/Cont=	>5	>5	>5	Cont/Cont=	nd	nd	>5	=Avg Bort/Cont (1h, 500nM)
HEK293T	bortezomib 1h, 500nM	2	2	1384.8	1384.79	Triosephosphate isomerase 1	cytoplasm	q	SLGELIGTLNAAKV	p		Bortez/Cont=	>5	>5	>5	Cont/Cont=	nd	nd	>5	=Avg Bort/Cont (1h, 500nM)
HEK293T	bortezomib 1h, 500nM	2	2	772.495	772.469	Protein SET (Phosphatase 2A inhibitor I2PP2A)	cytoplasm	r	SELIAKI	p		Bortez/Cont=	>5	>5	>5	Cont/Cont=	nd	nd	>5	=Avg Bort/Cont (1h, 500nM)
HEK293T	bortezomib 1h, 500nM	2	1	1228.71	1228.7	Far upstream element-binding protein 1	nucleus	a	AEIITDLLRSV	q		Bortez/Cont=	>5	>5	>5	Cont/Cont=	nd	nd	>5	=Avg Bort/Cont (1h, 500nM)
HEK293T	bortezomib 1h, 500nM	2	1	1299.73	1299.74	Far upstream element-binding protein 1	nucleus	h	AAEIITDLLRSV	q		Bortez/Cont=	>5	>5	>5	Cont/Cont=	nd	nd	>5	=Avg Bort/Cont (1h, 500nM)
HEK293T	bortezomib 1h, 500nM	2	1	926.565	926.555	Vimentin	cytoplasm	r	SSVPGVRLL	q		Bortez/Cont=	>5	>5	>5	Cont/Cont=	nd	nd	>5	=Avg Bort/Cont (1h, 500nM)
HEK293T	bortezomib 1h, 500nM	2	1	1630.78	1630.77	Protein SET (Phosphatase 2A inhibitor I2PP2A)	cytoplasm	a	LLGEEDEEALHYLT	r		Bortez/Cont=	>5	>5	>5	Cont/Cont=	nd	nd	>5	=Avg Bort/Cont (1h, 500nM)
HEK293T	bortezomib 1h, 500nM	3	1	1855.98	1856.01	40S Ribosomal protein S28	cytoplasm	e	GDVLTLLESEREARRL	r		Bortez/Cont=	>5	>5	>5	Cont/Cont=	nd	nd	>5	=Avg Bort/Cont (1h, 500nM)
HEK293T	bortezomib 1h, 500nM	4	1	1855.98	1856.01	40S Ribosomal protein S28	cytoplasm	e	GDVLTLLESEREARRL	r		Bortez/Cont=	>5	>5	>5	Cont/Cont=	nd	nd	>5	=Avg Bort/Cont (1h, 500nM)
HEK293T	bortezomib 1h, 500nM	2	1	1199.67	1199.69	Heat shock 10kDa protein 1 (chaperonin 10)	mitochondria	f	LPLFDRVLVE	r		Bortez/Cont=	>5	>5	>5	Cont/Cont=	nd	nd	>5	=Avg Bort/Cont (1h, 500nM)
HEK293T	bortezomib 1h, 500nM	2	1	1346.74	1346.76	Heat shock 10kDa protein 1 (chaperonin 10)	mitochondria	k	FLPLFDRVLVE	r		Bortez/Cont=	>5	>5	>5	Cont/Cont=	nd	nd	>5	=Avg Bort/Cont (1h, 500nM)
HEK293T	bortezomib 1h, 500nM	2	1	1086.62	1086.61	Heat shock 10kDa protein 1 (chaperonin 10)	mitochondria	l	PLFDRVLVE	r		Bortez/Cont=	>5	>5	>5	Cont/Cont=	nd	nd	>5	=Avg Bort/Cont (1h, 500nM)
HEK293T	bortezomib 1h, 500nM	2	1	1188.58	1188.58	Vimentin	cytoplasm	r	DNLAEDIMRL	r		Bortez/Cont=	>5	>5	>5	Cont/Cont=	nd	nd	>5	=Avg Bort/Cont (1h, 500nM)
HEK293T	bortezomib 1h, 500nM	2	2	1174.6	1174.55	Heat shock 10kDa protein 1 (chaperonin 10)	mitochondria	v	LDDKDYFLF	r		Bortez/Cont=	>5	>5	>5	Cont/Cont=	nd	nd	>5	=Avg Bort/Cont (1h, 500nM)
HEK293T	bortezomib 1h, 500nM	2	2	1273.64	1273.62	Heat shock 10kDa protein 1 (chaperonin 10)	mitochondria	v	VLDDKDYFLF	r		Bortez/Cont=	>5	>5	>5	Cont/Cont=	nd	nd	>5	=Avg Bort/Cont (1h, 500nM)
HEK293T	bortezomib 1h, 500nM	4	2	1269.76	1269.71	Splicing factor, arginine/serine-rich 1	cytoplasm	y	GAIRDIDLKNR	r		Bortez/Cont=	5.90909	5.81818	6.36364	Cont/Cont=	0.909091	1.09091	>5	=Avg Bort/Cont (1h, 500nM)
HEK293T	bortezomib 1h, 500nM	2	2	1346.67	1346.65	Cytochrome c oxidase subunit 5a	mitochondria	y	FNKPDIDAWEL	r		Bortez/Cont=	>5	>5	>5	Cont/Cont=	nd	nd	>5	=Avg Bort/Cont (1h, 500nM)
HEK293T	bortezomib 1h, 500nM	2	2	1061.6	1061.58	Thioredoxin	nucleus	a	AGDKLVVVDF	s		Bortez/Cont=	>5	>5	>5	Cont/Cont=	nd	nd	>5	=Avg Bort/Cont (1h, 500nM)
HEK293T	bortezomib 1h, 500nM	1	1	858.456	858.47	40S Ribosomal protein S28	cytoplasm	e	GDVLTLLE	s		Bortez/Cont=	>5	>5	>5	Cont/Cont=	nd	nd	>5	=Avg Bort/Cont (1h, 500nM)
HEK293T	bortezomib 1h, 500nM	2	2	1431.81	1431.76	Thioredoxin	nucleus	e	ALDAAGDKLVVVDF	s		Bortez/Cont=	>5	>5	>5	Cont/Cont=	nd	nd	>5	=Avg Bort/Cont (1h, 500nM)
HEK293T	bortezomib 1h, 500nM	3	3	1852.02	1852.04	60S acidic ribosomal protein P2	cytoplasm	e	LNGKNIEDVIAQGIGKLA	s		Bortez/Cont=	>5	>5	>5	Cont/Cont=	nd	nd	>5	=Avg Bort/Cont (1h, 500nM)
HEK293T	bortezomib 1h, 500nM	2	1	1355.79	1355.79	Heat shock 10kDa protein 1 (chaperonin 10)	mitochondria	f	LPLFDRVLVER	s		Bortez/Cont=	>5	>5	>5	Cont/Cont=	nd	nd	>5	=Avg Bort/Cont (1h, 500nM)
HEK293T	bortezomib 1h, 500nM	3	1	1355.81	1355.79	Heat shock 10kDa protein 1 (chaperonin 10)	mitochondria	f	LPLFDRVLVER	s		Bortez/Cont=	>5	>5	>5	Cont/Cont=	nd	nd	>5	=Avg Bort/Cont (1h, 500nM)
HEK293T	bortezomib 1h, 500nM	3	3	2352.19	2352.18	Thioredoxin	nucleus	i	ESKTAFQEALDAAGDKLVVVDF	s		Bortez/Cont=	>5	>5	>5	Cont/Cont=	nd	nd	>5	=Avg Bort/Cont (1h, 500nM)
HEK293T	bortezomib 1h, 500nM	3	1	1502.85	1502.86	Heat shock 10kDa protein 1 (chaperonin 10)	mitochondria	k	FLPLFDRVLVER	s		Bortez/Cont=	>5	>5	>5	Cont/Cont=	nd	nd	>5	=Avg Bort/Cont (1h, 500nM)
HEK293T	bortezomib 1h, 500nM	3	1	1242.7	1242.71	Heat shock 10kDa protein 1 (chaperonin 10)	mitochondria	l	PLFDRVLVER	s		Bortez/Cont=	>5	>5	>5	Cont/Cont=	nd	nd	>5	=Avg Bort/Cont (1h, 500nM)
HEK293T	bortezomib 1h, 500nM	2	1	1242.72	1242.71	Heat shock 10kDa protein 1 (chaperonin 10)	mitochondria	l	PLFDRVLVER	s		Bortez/Cont=	>5	>5	>5	Cont/Cont=	nd	nd	>5	=Avg Bort/Cont (1h, 500nM)
HEK293T	bortezomib 1h, 500nM	2	2	1247.67	1247.64	Thioredoxin	nucleus	l	DAAGDKLVVVDF	s		Bortez/Cont=	>5	>5	>5	Cont/Cont=	nd	nd	>5	=Avg Bort/Cont (1h, 500nM)
HEK293T	bortezomib 1h, 500nM	2	2	1365.84	1365.8	60S acidic ribosomal protein P2	cytoplasm	q	GIGKLASVPAGGAVAV	s		Bortez/Cont=	>5	>5	>5	Cont/Cont=	nd	nd	>5	=Avg Bort/Cont (1h, 500nM)
HEK293T	bortezomib 1h, 500nM	3	3	2018.07	2018.01	Hepatoma-derived growth factor	nucleus	r	KGFSEGLWEIENNPTVKA	s		Bortez/Cont=	>5	>5	>5	Cont/Cont=	nd	nd	>5	=Avg Bort/Cont (1h, 500nM)
HEK293T	bortezomib 1h, 500nM	4	3	2281.19	2281.21	Peptidylprolyl isomerase A	cytoplasm	r	VSFELFADKVPKTAENFRAL	s		Bortez/Cont=	>5	>5	>5	Cont/Cont=	nd	nd	>5	=Avg Bort/Cont (1h, 500nM)
HEK293T	bortezomib 1h, 500nM	3	3	2281.22	2281.21	Peptidylprolyl isomerase A	cytoplasm	r	VSFELFADKVPKTAENFRAL	s		Bortez/Cont=	>5	>5	>5	Cont/Cont=	nd	nd	>5	=Avg Bort/Cont (1h, 500nM)
HEK293T	bortezomib 1h, 500nM	2	1	1529.73	1529.72	Protein SET (Phosphatase 2A inhibitor I2PP2A)	cytoplasm	a	LLGEEDEEALHYL	t		Bortez/Cont=	>5	>5	>5	Cont/Cont=	nd	nd	>5	=Avg Bort/Cont (1h, 500nM)
HEK293T	bortezomib 1h, 500nM	3	3	1654.9	1654.91	Heat shock 10kDa protein 1 (chaperonin 10)	mitochondria	k	GGIMLPEKSQGKVLQA	t		Bortez/Cont=	>5	>5	>5	Cont/Cont=	nd	nd	>5	=Avg Bort/Cont (1h, 500nM)
HEK293T	bortezomib 1h, 500nM	2	3	1654.97	1654.91	Heat shock 10kDa protein 1 (chaperonin 10)	mitochondria	k	GGIMLPEKSQGKVLQA	t		Bortez/Cont=	>5	>5	>5	Cont/Cont=	nd	nd	>5	=Avg Bort/Cont (1h, 500nM)
HEK293T	bortezomib 1h, 500nM	2	2	1516.86	1516.83	Protein SET (Phosphatase 2A inhibitor I2PP2A)	cytoplasm	r	SELIAKIPNFWVT	t		Bortez/Cont=	>5	>5	>5	Cont/Cont=	nd	nd	>5	=Avg Bort/Cont (1h, 500nM)
HEK293T	bortezomib 1h, 500nM	2	1	1616.8	1616.8	Macrophage migration inhibitory factor	cytoplasm	v	PDGFLSELTQQLAQA	t		Bortez/Cont=	>5	>5	>5	Cont/Cont=	nd	nd	>5	=Avg Bort/Cont (1h, 500nM)
HEK293T	bortezomib 1h, 500nM	2	2	1141.67	1141.63	Phosphatidylethanolamine-binding protein 1	cytoplasm	y	AGAAVDELGKVL	t		Bortez/Cont=	>5	>5	>5	Cont/Cont=	nd	nd	>5	=Avg Bort/Cont (1h, 500nM)
HEK293T	bortezomib 1h, 500nM	3	1	1786.85	1786.87	Protein SET (Phosphatase 2A inhibitor I2PP2A)	cytoplasm	a	LLGEEDEEALHYLTR	v		Bortez/Cont=	>5	>5	>5	Cont/Cont=	nd	nd	>5	=Avg Bort/Cont (1h, 500nM)
HEK293T	bortezomib 1h, 500nM	2	1	1786.87	1786.87	Protein SET (Phosphatase 2A inhibitor I2PP2A)	cytoplasm	a	LLGEEDEEALHYLTR	v		Bortez/Cont=	>5	>5	>5	Cont/Cont=	nd	nd	>5	=Avg Bort/Cont (1h, 500nM)
HEK293T	bortezomib 1h, 500nM	4	1	2619.3	2619.29	Protein SET (Phosphatase 2A inhibitor I2PP2A)	cytoplasm	f	VNHPQVSALLGEEDEEALHYLTR	v		Bortez/Cont=	>5	>5	>5	Cont/Cont=	nd	nd	>5	=Avg Bort/Cont (1h, 500nM)
HEK293T	bortezomib 1h, 500nM	3	1	2269.09	2269.12	Protein SET (Phosphatase 2A inhibitor I2PP2A)	cytoplasm	h	PQVSALLGEEDEEALHYLTR	v		Bortez/Cont=	>5	>5	>5	Cont/Cont=	nd	nd	>5	=Avg Bort/Cont (1h, 500nM)
HEK293T	bortezomib 1h, 500nM	2	1	2269.09	2269.12	Protein SET (Phosphatase 2A inhibitor I2PP2A)	cytoplasm	h	PQVSALLGEEDEEALHYLTR	v		Bortez/Cont=	>5	>5	>5	Cont/Cont=	nd	nd	>5	=Avg Bort/Cont (1h, 500nM)
HEK293T	bortezomib 1h, 500nM	3	1	2497.21	2497.23	Protein SET (Phosphatase 2A inhibitor I2PP2A)	cytoplasm	h	PQVSALLGEEDEEALHYLTRVE	v		Bortez/Cont=	>5	>5	>5	Cont/Cont=	nd	nd	>5	=Avg Bort/Cont (1h, 500nM)
HEK293T	bortezomib 1h, 500nM	2	1	906.504	906.496	Heat shock 10kDa protein 1 (chaperonin 10)	mitochondria	k	FLPLFDR	v		Bortez/Cont=	>5	>5	>5	Cont/Cont=	nd	nd	>5	=Avg Bort/Cont (1h, 500nM)
HEK293T	bortezomib 1h, 500nM	3	2	1479.83	1479.78	Macrophage migration inhibitory factor	cytoplasm	l	AQATGKPPQYIAVH	v		Bortez/Cont=	>5	>5	>5	Cont/Cont=	nd	nd	>5	=Avg Bort/Cont (1h, 500nM)
HEK293T	bortezomib 1h, 500nM	3	1	1857.91	1857.91	Protein SET (Phosphatase 2A inhibitor I2PP2A)	cytoplasm	s	ALLGEEDEEALHYLTR	v		Bortez/Cont=	>5	>5	>5	Cont/Cont=	nd	nd	>5	=Avg Bort/Cont (1h, 500nM)
HEK293T	bortezomib 1h, 500nM	3	3	1474.86	1474.8	Heat shock 10kDa protein 1 (chaperonin 10)	mitochondria	v	GDKVLLPEYGGTKV	v		Bortez/Cont=	>5	>5	>5	Cont/Cont=	nd	nd	>5	=Avg Bort/Cont (1h, 500nM)
HEK293T	bortezomib 1h, 500nM	3	3	3628.8								Bortez/Cont=	0.333333	0.333333	0.333333	Cont/Cont=	0.833333	1.16667	0.333333	=Avg Bort/Cont (1h, 500nM)
HEK293T	bortezomib 1h, 500nM	4	1	2777.54								Bortez/Cont=	0.378947	0.315789	0.315789	Cont/Cont=	1.05263	0.947368	0.336842	=Avg Bort/Cont (1h, 500nM)
HEK293T	bortezomib 1h, 500nM	3	2	2548.35								Bortez/Cont=	0.272727	0.327273	0.418182	Cont/Cont=	0.818182	1.18182	0.339394	=Avg Bort/Cont (1h, 500nM)
HEK293T	bortezomib 1h, 500nM	4	4	2924.64								Bortez/Cont=	0.421053	0.394737	0.394737	Cont/Cont=	1.01316	0.986842	0.403509	=Avg Bort/Cont (1h, 500nM)
HEK293T	bortezomib 1h, 500nM	4	3	2284.27								Bortez/Cont=	0.544	0.4	0.496	Cont/Cont=	1.04	0.96	0.48	=Avg Bort/Cont (1h, 500nM)
HEK293T	bortezomib 1h, 500nM	3	2	2213.09								Bortez/Cont=	0.62069	0.593103	0.593103	Cont/Cont=	0.965517	1.03448	0.602299	=Avg Bort/Cont (1h, 500nM)
HEK293T	bortezomib 1h, 500nM	2	2	2505.4								Bortez/Cont=	0.618182	0.545455	0.727273	Cont/Cont=	0.909091	1.09091	0.630303	=Avg Bort/Cont (1h, 500nM)
HEK293T	bortezomib 1h, 500nM	3	3	2548.38								Bortez/Cont=	0.695652	0.608696	0.608696	Cont/Cont=	1.21739	0.782609	0.637681	=Avg Bort/Cont (1h, 500nM)
HEK293T	bortezomib 1h, 500nM	3	3	1426.85								Bortez/Cont=	0.712329	0.630137	0.589041	Cont/Cont=	1.06849	0.931507	0.643836	=Avg Bort/Cont (1h, 500nM)
HEK293T	bortezomib 1h, 500nM	4	4	5316.75								Bortez/Cont=	0.727273	0.727273	0.545455	Cont/Cont=	1.2	0.8	0.666667	=Avg Bort/Cont (1h, 500nM)
HEK293T	bortezomib 1h, 500nM	3	2	2658.35								Bortez/Cont=	0.672727	0.727273	0.636364	Cont/Cont=	1.18182	0.818182	0.678788	=Avg Bort/Cont (1h, 500nM)
HEK293T	bortezomib 1h, 500nM	3	2	2365.19								Bortez/Cont=	0.57377	0.655738	0.901639	Cont/Cont=	0.901639	1.09836	0.710383	=Avg Bort/Cont (1h, 500nM)
HEK293T	bortezomib 1h, 500nM	4	3	2861.55								Bortez/Cont=	0.818182	0.818182	0.727273	Cont/Cont=	1.18182	0.818182	0.787879	=Avg Bort/Cont (1h, 500nM)
HEK293T	bortezomib 1h, 500nM	1	1	224.173								Bortez/Cont=	0.75	1.375	0.25	Cont/Cont=	1.125	0.875	0.791667	=Avg Bort/Cont (1h, 500nM)
HEK293T	bortezomib 1h, 500nM	3	2	1216.66								Bortez/Cont=	0.796748	0.813008	0.780488	Cont/Cont=	1.18699	0.813008	0.796748	=Avg Bort/Cont (1h, 500nM)
HEK293T	bortezomib 1h, 500nM	3	2	2311.29								Bortez/Cont=	0.859375	0.78125	0.78125	Cont/Cont=	1.01562	0.984375	0.807292	=Avg Bort/Cont (1h, 500nM)
HEK293T	bortezomib 1h, 500nM	4	4	2466.46								Bortez/Cont=	0.814815	0.814815	0.814815	Cont/Cont=	1.03704	0.962963	0.814815	=Avg Bort/Cont (1h, 500nM)
HEK293T	bortezomib 1h, 500nM	3	3	2739.19								Bortez/Cont=	0.862069	0.724138	0.862069	Cont/Cont=	1.03448	0.965517	0.816092	=Avg Bort/Cont (1h, 500nM)
HEK293T	bortezomib 1h, 500nM	3	2	1216.66								Bortez/Cont=	0.809917	0.842975	0.809917	Cont/Cont=	1.19008	0.809917	0.820937	=Avg Bort/Cont (1h, 500nM)
HEK293T	bortezomib 1h, 500nM	5	4	2466.49								Bortez/Cont=	0.979592	0.897959	0.816327	Cont/Cont=	1.02041	0.979592	0.897959	=Avg Bort/Cont (1h, 500nM)
HEK293T	bortezomib 1h, 500nM	5	2	2777.58								Bortez/Cont=	1.19266	0.825688	0.733945	Cont/Cont=	1.21101	0.788991	0.917431	=Avg Bort/Cont (1h, 500nM)
HEK293T	bortezomib 1h, 500nM	3	2	2525.33								Bortez/Cont=	1.00699	0.909091	0.881119	Cont/Cont=	1.09091	0.909091	0.932401	=Avg Bort/Cont (1h, 500nM)
HEK293T	bortezomib 1h, 500nM	2	1	920.5								Bortez/Cont=	1.3	0.5	1	Cont/Cont=	1.25	0.75	0.933333	=Avg Bort/Cont (1h, 500nM)
HEK293T	bortezomib 1h, 500nM	2	2	1973.06								Bortez/Cont=	1	0.866667	1	Cont/Cont=	1	1	0.955556	=Avg Bort/Cont (1h, 500nM)
HEK293T	bortezomib 1h, 500nM	2	2	1957.98								Bortez/Cont=	0.84	0.84	1.2	Cont/Cont=	0.8	1.2	0.96	=Avg Bort/Cont (1h, 500nM)
HEK293T	bortezomib 1h, 500nM	4	4	2239.35								Bortez/Cont=	1	0.88	1	Cont/Cont=	1	1	0.96	=Avg Bort/Cont (1h, 500nM)
HEK293T	bortezomib 1h, 500nM	5	5	2092.37								Bortez/Cont=	0.842105	0.947368	1.11579	Cont/Cont=	1.11579	0.884211	0.968421	=Avg Bort/Cont (1h, 500nM)
HEK293T	bortezomib 1h, 500nM	3	2	1692.88								Bortez/Cont=	0.992366	0.946565	0.992366	Cont/Cont=	1.00763	0.992366	0.977099	=Avg Bort/Cont (1h, 500nM)
HEK293T	bortezomib 1h, 500nM	6	7	4226.06								Bortez/Cont=	0.977444	0.902256	1.08271	Cont/Cont=	1.05263	0.947368	0.987469	=Avg Bort/Cont (1h, 500nM)
HEK293T	bortezomib 1h, 500nM	2	1	1140.6								Bortez/Cont=	1	0.888889	1.11111	Cont/Cont=	1.11111	0.888889	1	=Avg Bort/Cont (1h, 500nM)
HEK293T	bortezomib 1h, 500nM	2	2	1692.88								Bortez/Cont=	1.07143	1	0.971429	Cont/Cont=	0.928571	1.07143	1.01429	=Avg Bort/Cont (1h, 500nM)
HEK293T	bortezomib 1h, 500nM	3	2	2867.6								Bortez/Cont=	1.22449	0.693878	1.14286	Cont/Cont=	1.02041	0.979592	1.02041	=Avg Bort/Cont (1h, 500nM)
HEK293T	bortezomib 1h, 500nM	4	3	1948.06								Bortez/Cont=	1.08571	1	1	Cont/Cont=	1	1	1.02857	=Avg Bort/Cont (1h, 500nM)
HEK293T	bortezomib 1h, 500nM	4	2	2467.39								Bortez/Cont=	1.11111	0.972222	1.02778	Cont/Cont=	0.972222	1.02778	1.03704	=Avg Bort/Cont (1h, 500nM)
HEK293T	bortezomib 1h, 500nM	2	1	2613.16								Bortez/Cont=	1.25	1	0.9	Cont/Cont=	1	1	1.05	=Avg Bort/Cont (1h, 500nM)
HEK293T	bortezomib 1h, 500nM	3	2	3248.69								Bortez/Cont=	1.15385	1.07692	0.961538	Cont/Cont=	1.23077	0.769231	1.0641	=Avg Bort/Cont (1h, 500nM)
HEK293T	bortezomib 1h, 500nM	2	2	1891.02								Bortez/Cont=	1.05263	1.22807	1.05263	Cont/Cont=	1.05263	0.947368	1.11111	=Avg Bort/Cont (1h, 500nM)
HEK293T	bortezomib 1h, 500nM	4	2	3249.66								Bortez/Cont=	1.17117	1.26126	0.900901	Cont/Cont=	1.18919	0.810811	1.11111	=Avg Bort/Cont (1h, 500nM)
HEK293T	bortezomib 1h, 500nM	2	2	851.56								Bortez/Cont=	1.2381	1.12381	1.04762	Cont/Cont=	1.04762	0.952381	1.13651	=Avg Bort/Cont (1h, 500nM)
HEK293T	bortezomib 1h, 500nM	5	4	3901.08								Bortez/Cont=	1.25862	1.12069	1.05172	Cont/Cont=	0.948276	1.05172	1.14368	=Avg Bort/Cont (1h, 500nM)
HEK293T	bortezomib 1h, 500nM	5	4	2116.28								Bortez/Cont=	1.28	1.3	1.04	Cont/Cont=	1	1	1.20667	=Avg Bort/Cont (1h, 500nM)
HEK293T	bortezomib 1h, 500nM	3	2	2467.5								Bortez/Cont=	1.35417	1.25	1.14583	Cont/Cont=	0.958333	1.04167	1.25	=Avg Bort/Cont (1h, 500nM)
HEK293T	bortezomib 1h, 500nM	5	1	2678.45								Bortez/Cont=	1.16667	0.833333	1.83333	Cont/Cont=	1	1	1.27778	=Avg Bort/Cont (1h, 500nM)
HEK293T	bortezomib 1h, 500nM	2	2	1591.92								Bortez/Cont=	1.64835	1.31868	0.989011	Cont/Cont=	1.0989	0.901099	1.31868	=Avg Bort/Cont (1h, 500nM)
HEK293T	bortezomib 1h, 500nM	3	1	3467.59								Bortez/Cont=	1.33333	1.33333	1.33333	Cont/Cont=	1	1	1.33333	=Avg Bort/Cont (1h, 500nM)
HEK293T	bortezomib 1h, 500nM	4	2	1626.89								Bortez/Cont=	1.50562	1.37079	1.30337	Cont/Cont=	1.01124	0.988764	1.39326	=Avg Bort/Cont (1h, 500nM)
HEK293T	bortezomib 1h, 500nM	3	4	2355.32								Bortez/Cont=	1.41176	1.48235	1.29412	Cont/Cont=	1.24706	0.752941	1.39608	=Avg Bort/Cont (1h, 500nM)
HEK293T	bortezomib 1h, 500nM	4	4	2355.37								Bortez/Cont=	1.41935	1.50538	1.29032	Cont/Cont=	1.1828	0.817204	1.40502	=Avg Bort/Cont (1h, 500nM)
HEK293T	bortezomib 1h, 500nM	4	5	4214.79								Bortez/Cont=	1.55556	1.37778	1.33333	Cont/Cont=	1.11111	0.888889	1.42222	=Avg Bort/Cont (1h, 500nM)
HEK293T	bortezomib 1h, 500nM	2	1	1068.56								Bortez/Cont=	1.53846	1.23077	1.63077	Cont/Cont=	1.07692	0.923077	1.46667	=Avg Bort/Cont (1h, 500nM)
HEK293T	bortezomib 1h, 500nM	6	6	4190.24								Bortez/Cont=	1.59091	1.47727	1.36364	Cont/Cont=	0.977273	1.02273	1.47727	=Avg Bort/Cont (1h, 500nM)
HEK293T	bortezomib 1h, 500nM	4	1	1757.98								Bortez/Cont=	1.85714	1.42857	1.17143	Cont/Cont=	1.14286	0.857143	1.48571	=Avg Bort/Cont (1h, 500nM)
HEK293T	bortezomib 1h, 500nM	2	1	1249.64								Bortez/Cont=	1.33333	1.29167	1.83333	Cont/Cont=	0.75	1.25	1.48611	=Avg Bort/Cont (1h, 500nM)
HEK293T	bortezomib 1h, 500nM	3	1	1409.81								Bortez/Cont=	1.84615	1.41538	1.23077	Cont/Cont=	1.07692	0.923077	1.49744	=Avg Bort/Cont (1h, 500nM)
HEK293T	bortezomib 1h, 500nM	1	1	396.226								Bortez/Cont=	0.466667	0.466667	3.66667	Cont/Cont=	1	1	1.53333	=Avg Bort/Cont (1h, 500nM)
HEK293T	bortezomib 1h, 500nM	5	1	2721.36								Bortez/Cont=	1.69231	1.53846	1.38462	Cont/Cont=	1.07692	0.923077	1.53846	=Avg Bort/Cont (1h, 500nM)
HEK293T	bortezomib 1h, 500nM	4	2	1983.15								Bortez/Cont=	1.625	1.425	1.575	Cont/Cont=	0.875	1.125	1.54167	=Avg Bort/Cont (1h, 500nM)
HEK293T	bortezomib 1h, 500nM	2	1	2721.42								Bortez/Cont=	1.7037	1.48148	1.48148	Cont/Cont=	1.11111	0.888889	1.55556	=Avg Bort/Cont (1h, 500nM)
HEK293T	bortezomib 1h, 500nM	4	1	2721.39								Bortez/Cont=	1.83333	1.66667	1.33333	Cont/Cont=	1	1	1.61111	=Avg Bort/Cont (1h, 500nM)
HEK293T	bortezomib 1h, 500nM	2	1	1591.76								Bortez/Cont=	2	1.51429	1.42857	Cont/Cont=	0.857143	1.14286	1.64762	=Avg Bort/Cont (1h, 500nM)
HEK293T	bortezomib 1h, 500nM	3	2	1983.15								Bortez/Cont=	1.78049	1.70732	1.5122	Cont/Cont=	1.02439	0.97561	1.66667	=Avg Bort/Cont (1h, 500nM)
HEK293T	bortezomib 1h, 500nM	2	1	1421.69								Bortez/Cont=	1.84615	1.53846	1.69231	Cont/Cont=	1.07692	0.923077	1.69231	=Avg Bort/Cont (1h, 500nM)
HEK293T	bortezomib 1h, 500nM	2	1	1272.58								Bortez/Cont=	2.13333	1.66667	1.5	Cont/Cont=	1.16667	0.833333	1.76667	=Avg Bort/Cont (1h, 500nM)
HEK293T	bortezomib 1h, 500nM	2	2	1622.92								Bortez/Cont=	2.38095	1.90476	1.20635	Cont/Cont=	1.20635	0.793651	1.83069	=Avg Bort/Cont (1h, 500nM)
HEK293T	bortezomib 1h, 500nM	3	2	2465.33								Bortez/Cont=	1.92105	1.92105	1.65789	Cont/Cont=	1.02632	0.973684	1.83333	=Avg Bort/Cont (1h, 500nM)
HEK293T	bortezomib 1h, 500nM	3	1	1254.74								Bortez/Cont=	2.25926	2.03704	1.2963	Cont/Cont=	0.555556	1.44444	1.8642	=Avg Bort/Cont (1h, 500nM)
HEK293T	bortezomib 1h, 500nM	3	1	2721.4								Bortez/Cont=	2.10526	1.75439	1.75439	Cont/Cont=	1.05263	0.947368	1.87135	=Avg Bort/Cont (1h, 500nM)
HEK293T	bortezomib 1h, 500nM	2	1	1502.74								Bortez/Cont=	2.18182	2.10909	1.45455	Cont/Cont=	1.27273	0.727273	1.91515	=Avg Bort/Cont (1h, 500nM)
HEK293T	bortezomib 1h, 500nM	3	1	2372.13								Bortez/Cont=	2.18182	1.74545	1.89091	Cont/Cont=	1.09091	0.909091	1.93939	=Avg Bort/Cont (1h, 500nM)
HEK293T	bortezomib 1h, 500nM	2	1	581.337								Bortez/Cont=	2.4	2	1.6	Cont/Cont=	0.4	1.6	2	=Avg Bort/Cont (1h, 500nM)
HEK293T	bortezomib 1h, 500nM	2	2	878.498								Bortez/Cont=	2.26667	2.1	1.76667	Cont/Cont=	1	1	2.04444	=Avg Bort/Cont (1h, 500nM)
HEK293T	bortezomib 1h, 500nM	2	2	1955.09								Bortez/Cont=	1.83333	1.83333	2.5	Cont/Cont=	1	1	2.05556	=Avg Bort/Cont (1h, 500nM)
HEK293T	bortezomib 1h, 500nM	3	2	1955.08								Bortez/Cont=	2.06349	1.93651	2.38095	Cont/Cont=	0.984127	1.01587	2.12698	=Avg Bort/Cont (1h, 500nM)
HEK293T	bortezomib 1h, 500nM	2	1	1171.58								Bortez/Cont=	2.5	2.08333	1.875	Cont/Cont=	0.625	1.375	2.15278	=Avg Bort/Cont (1h, 500nM)
HEK293T	bortezomib 1h, 500nM	2	1	730.415								Bortez/Cont=	2.52381	2.14286	1.90476	Cont/Cont=	1.19048	0.809524	2.19048	=Avg Bort/Cont (1h, 500nM)
HEK293T	bortezomib 1h, 500nM	3	3	2154.21								Bortez/Cont=	2.6	2.4	1.72	Cont/Cont=	1.4	0.6	2.24	=Avg Bort/Cont (1h, 500nM)
HEK293T	bortezomib 1h, 500nM	3	3	1077.61								Bortez/Cont=	2.54902	2.54902	2.15686	Cont/Cont=	1.05882	0.941176	2.4183	=Avg Bort/Cont (1h, 500nM)
HEK293T	bortezomib 1h, 500nM	4	6	2155.28								Bortez/Cont=	2.88889	2.44444	2.04444	Cont/Cont=	1.11111	0.888889	2.45926	=Avg Bort/Cont (1h, 500nM)
HEK293T	bortezomib 1h, 500nM	2	1	1069.59								Bortez/Cont=	3.38462	2.20513	1.79487	Cont/Cont=	1.12821	0.871795	2.46154	=Avg Bort/Cont (1h, 500nM)
HEK293T	bortezomib 1h, 500nM	3	3	2182.28								Bortez/Cont=	2.3913	2.30435	2.82609	Cont/Cont=	1.08696	0.913043	2.50725	=Avg Bort/Cont (1h, 500nM)
HEK293T	bortezomib 1h, 500nM	3	2	1145.64								Bortez/Cont=	2.88889	3.11111	1.55556	Cont/Cont=	0.666667	1.33333	2.51852	=Avg Bort/Cont (1h, 500nM)
HEK293T	bortezomib 1h, 500nM	3	1	2016.01								Bortez/Cont=	2.92683	2.68293	1.95122	Cont/Cont=	0.97561	1.02439	2.52033	=Avg Bort/Cont (1h, 500nM)
HEK293T	bortezomib 1h, 500nM	4	4	2575.35								Bortez/Cont=	2.79245	2.45283	2.37736	Cont/Cont=	1.0566	0.943396	2.54088	=Avg Bort/Cont (1h, 500nM)
HEK293T	bortezomib 1h, 500nM	2	1	920.52								Bortez/Cont=	3.2	2.4	2.25	Cont/Cont=	1.25	0.75	2.61667	=Avg Bort/Cont (1h, 500nM)
HEK293T	bortezomib 1h, 500nM	2	1	1805.97								Bortez/Cont=	2.63158	2.36842	2.89474	Cont/Cont=	1.05263	0.947368	2.63158	=Avg Bort/Cont (1h, 500nM)
HEK293T	bortezomib 1h, 500nM	2	1	570.316								Bortez/Cont=	3.28571	2.85714	1.90476	Cont/Cont=	0.952381	1.04762	2.68254	=Avg Bort/Cont (1h, 500nM)
HEK293T	bortezomib 1h, 500nM	5	2	2678.53								Bortez/Cont=	3.2	2.88889	2.08889	Cont/Cont=	1.11111	0.888889	2.72593	=Avg Bort/Cont (1h, 500nM)
HEK293T	bortezomib 1h, 500nM	3	1	995.573								Bortez/Cont=	3.6	2.57143	2.4	Cont/Cont=	1.14286	0.857143	2.85714	=Avg Bort/Cont (1h, 500nM)
HEK293T	bortezomib 1h, 500nM	2	1	996.544								Bortez/Cont=	3.14286	2.85714	2.85714	Cont/Cont=	1.14286	0.857143	2.95238	=Avg Bort/Cont (1h, 500nM)
HEK293T	bortezomib 1h, 500nM	6	1	3022.49								Bortez/Cont=	3.2	2.8	3.2	Cont/Cont=	1.2	0.8	3.06667	=Avg Bort/Cont (1h, 500nM)
HEK293T	bortezomib 1h, 500nM	3	1	984.599								Bortez/Cont=	3.65714	2.85714	2.74286	Cont/Cont=	1.14286	0.857143	3.08571	=Avg Bort/Cont (1h, 500nM)
HEK293T	bortezomib 1h, 500nM	3	1	1337.72								Bortez/Cont=	3.73333	2.73333	2.93333	Cont/Cont=	1.2	0.8	3.13333	=Avg Bort/Cont (1h, 500nM)
HEK293T	bortezomib 1h, 500nM	3	1	1109.61								Bortez/Cont=	4.06452	2.83871	2.64516	Cont/Cont=	1.03226	0.967742	3.1828	=Avg Bort/Cont (1h, 500nM)
HEK293T	bortezomib 1h, 500nM	6	2	2678.49								Bortez/Cont=	3.6	3.42857	2.57143	Cont/Cont=	1.14286	0.857143	3.2	=Avg Bort/Cont (1h, 500nM)
HEK293T	bortezomib 1h, 500nM	3	1	1474.81								Bortez/Cont=	3.68421	3.10526	2.89474	Cont/Cont=	1.05263	0.947368	3.22807	=Avg Bort/Cont (1h, 500nM)
HEK293T	bortezomib 1h, 500nM	3	1	1937								Bortez/Cont=	4.375	3.125	2.1875	Cont/Cont=	1.0625	0.9375	3.22917	=Avg Bort/Cont (1h, 500nM)
HEK293T	bortezomib 1h, 500nM	3	1	1232.65								Bortez/Cont=	4.26667	3	2.66667	Cont/Cont=	1	1	3.31111	=Avg Bort/Cont (1h, 500nM)
HEK293T	bortezomib 1h, 500nM	2	1	827.476								Bortez/Cont=	4	3	3	Cont/Cont=	1	1	3.33333	=Avg Bort/Cont (1h, 500nM)
HEK293T	bortezomib 1h, 500nM	2	1	1543.83								Bortez/Cont=	4	3.46667	2.66667	Cont/Cont=	1.33333	0.666667	3.37778	=Avg Bort/Cont (1h, 500nM)
HEK293T	bortezomib 1h, 500nM	3	1	1355.75								Bortez/Cont=	3.57143	3.57143	3.57143	Cont/Cont=	0.714286	1.28571	3.57143	=Avg Bort/Cont (1h, 500nM)
HEK293T	bortezomib 1h, 500nM	3	2	1186.67								Bortez/Cont=	4.11111	3.88889	3.05556	Cont/Cont=	0.888889	1.11111	3.68519	=Avg Bort/Cont (1h, 500nM)
HEK293T	bortezomib 1h, 500nM	3	1	1173.65								Bortez/Cont=	4.44444	3.7037	2.96296	Cont/Cont=	1.11111	0.888889	3.7037	=Avg Bort/Cont (1h, 500nM)
HEK293T	bortezomib 1h, 500nM	3	1	1160.64								Bortez/Cont=	4.73333	3.93333	2.8	Cont/Cont=	1	1	3.82222	=Avg Bort/Cont (1h, 500nM)
HEK293T	bortezomib 1h, 500nM	2	3	1955.13								Bortez/Cont=	5.84	4.4	2.8	Cont/Cont=	1.2	0.8	4.34667	=Avg Bort/Cont (1h, 500nM)
HEK293T	bortezomib 1h, 500nM	2	1	1067.63								Bortez/Cont=	6.08696	4.78261	3.91304	Cont/Cont=	1.13043	0.869565	4.92754	=Avg Bort/Cont (1h, 500nM)
HEK293T	bortezomib 1h, 500nM	2	3	997.466								Bortez/Cont=	<0.2	<0.2	<0.2	Cont/Cont=	1.00826	0.991736	<0.2	=Avg Bort/Cont (1h, 500nM)
HEK293T	bortezomib 1h, 500nM	2	3	997.466								Bortez/Cont=	<0.2	<0.2	<0.2	Cont/Cont=	1.01639	0.983607	<0.2	=Avg Bort/Cont (1h, 500nM)
HEK293T	bortezomib 1h, 500nM	2	1	1039.56								Bortez/Cont=	<0.2	<0.2	<0.2	Cont/Cont=	0.928571	1.07143	<0.2	=Avg Bort/Cont (1h, 500nM)
HEK293T	bortezomib 1h, 500nM	1	1	1039.57								Bortez/Cont=	<0.2	<0.2	<0.2	Cont/Cont=	1.04762	0.952381	<0.2	=Avg Bort/Cont (1h, 500nM)
HEK293T	bortezomib 1h, 500nM	2	2	1079.54								Bortez/Cont=	<0.2	<0.2	<0.2	Cont/Cont=	1.00709	0.992908	<0.2	=Avg Bort/Cont (1h, 500nM)
HEK293T	bortezomib 1h, 500nM	4	3	1781.02								Bortez/Cont=	<0.2	<0.2	<0.2	Cont/Cont=	1.125	0.875	<0.2	=Avg Bort/Cont (1h, 500nM)
HEK293T	bortezomib 1h, 500nM	3	3	2186.23								Bortez/Cont=	<0.2	<0.2	<0.2	Cont/Cont=	1.0069	0.993103	<0.2	=Avg Bort/Cont (1h, 500nM)
HEK293T	bortezomib 1h, 500nM	4	3	4121.97								Bortez/Cont=	<0.2	<0.2	<0.2	Cont/Cont=	0.862069	1.13793	<0.2	=Avg Bort/Cont (1h, 500nM)
HEK293T	bortezomib 1h, 500nM	1	1	357.29								Bortez/Cont=	>5	>5	>5	Cont/Cont=	nd	nd	>5	=Avg Bort/Cont (1h, 500nM)
HEK293T	bortezomib 1h, 500nM	1	1	506.279								Bortez/Cont=	>5	>5	>5	Cont/Cont=	nd	nd	>5	=Avg Bort/Cont (1h, 500nM)
HEK293T	bortezomib 1h, 500nM	1	1	531.307								Bortez/Cont=	>5	>5	>5	Cont/Cont=	nd	nd	>5	=Avg Bort/Cont (1h, 500nM)
HEK293T	bortezomib 1h, 500nM	2	2	542.433								Bortez/Cont=	>5	>5	>5	Cont/Cont=	nd	nd	>5	=Avg Bort/Cont (1h, 500nM)
HEK293T	bortezomib 1h, 500nM	1	1	565.316								Bortez/Cont=	>5	>5	>5	Cont/Cont=	nd	nd	>5	=Avg Bort/Cont (1h, 500nM)
HEK293T	bortezomib 1h, 500nM	2	1	568.424								Bortez/Cont=	>5	>5	>5	Cont/Cont=	nd	nd	>5	=Avg Bort/Cont (1h, 500nM)
HEK293T	bortezomib 1h, 500nM	2	1	573.374								Bortez/Cont=	>5	>5	>5	Cont/Cont=	nd	nd	>5	=Avg Bort/Cont (1h, 500nM)
HEK293T	bortezomib 1h, 500nM	2	1	610.417								Bortez/Cont=	6.66667	5.55556	3.88889	Cont/Cont=	1.11111	0.888889	>5	=Avg Bort/Cont (1h, 500nM)
HEK293T	bortezomib 1h, 500nM	2	2	618.473								Bortez/Cont=	>5	>5	>5	Cont/Cont=	nd	nd	>5	=Avg Bort/Cont (1h, 500nM)
HEK293T	bortezomib 1h, 500nM	1	1	636.346								Bortez/Cont=	>5	>5	>5	Cont/Cont=	nd	nd	>5	=Avg Bort/Cont (1h, 500nM)
HEK293T	bortezomib 1h, 500nM	2	1	641.449								Bortez/Cont=	>5	>5	>5	Cont/Cont=	nd	nd	>5	=Avg Bort/Cont (1h, 500nM)
HEK293T	bortezomib 1h, 500nM	1	1	669.368								Bortez/Cont=	>5	>5	>5	Cont/Cont=	nd	nd	>5	=Avg Bort/Cont (1h, 500nM)
HEK293T	bortezomib 1h, 500nM	2	2	683.392								Bortez/Cont=	>5	>5	>5	Cont/Cont=	nd	nd	>5	=Avg Bort/Cont (1h, 500nM)
HEK293T	bortezomib 1h, 500nM	2	1	686.455								Bortez/Cont=	>5	>5	>5	Cont/Cont=	nd	nd	>5	=Avg Bort/Cont (1h, 500nM)
HEK293T	bortezomib 1h, 500nM	2	2	686.457								Bortez/Cont=	>5	>5	>5	Cont/Cont=	nd	nd	>5	=Avg Bort/Cont (1h, 500nM)
HEK293T	bortezomib 1h, 500nM	2	2	691.443								Bortez/Cont=	>5	>5	>5	Cont/Cont=	nd	nd	>5	=Avg Bort/Cont (1h, 500nM)
HEK293T	bortezomib 1h, 500nM	2	1	695.394								Bortez/Cont=	>5	>5	>5	Cont/Cont=	nd	nd	>5	=Avg Bort/Cont (1h, 500nM)
HEK293T	bortezomib 1h, 500nM	1	1	719.381								Bortez/Cont=	>5	>5	>5	Cont/Cont=	nd	nd	>5	=Avg Bort/Cont (1h, 500nM)
HEK293T	bortezomib 1h, 500nM	2	1	737.45								Bortez/Cont=	>5	>5	>5	Cont/Cont=	nd	nd	>5	=Avg Bort/Cont (1h, 500nM)
HEK293T	bortezomib 1h, 500nM	2	1	751.398								Bortez/Cont=	9.06667	6.93333	4.93333	Cont/Cont=	1.06667	0.933333	>5	=Avg Bort/Cont (1h, 500nM)
HEK293T	bortezomib 1h, 500nM	2	1	754.471								Bortez/Cont=	>5	>5	>5	Cont/Cont=	nd	nd	>5	=Avg Bort/Cont (1h, 500nM)
HEK293T	bortezomib 1h, 500nM	2	1	759.441								Bortez/Cont=	>5	>5	>5	Cont/Cont=	nd	nd	>5	=Avg Bort/Cont (1h, 500nM)
HEK293T	bortezomib 1h, 500nM	2	1	759.452								Bortez/Cont=	>5	>5	>5	Cont/Cont=	nd	nd	>5	=Avg Bort/Cont (1h, 500nM)
HEK293T	bortezomib 1h, 500nM	2	2	759.472								Bortez/Cont=	>5	>5	>5	Cont/Cont=	nd	nd	>5	=Avg Bort/Cont (1h, 500nM)
HEK293T	bortezomib 1h, 500nM	2	1	770.488								Bortez/Cont=	>5	>5	>5	Cont/Cont=	nd	nd	>5	=Avg Bort/Cont (1h, 500nM)
HEK293T	bortezomib 1h, 500nM	2	1	774.464								Bortez/Cont=	>5	>5	>5	Cont/Cont=	nd	nd	>5	=Avg Bort/Cont (1h, 500nM)
HEK293T	bortezomib 1h, 500nM	1	1	785.407								Bortez/Cont=	>5	>5	>5	Cont/Cont=	nd	nd	>5	=Avg Bort/Cont (1h, 500nM)
HEK293T	bortezomib 1h, 500nM	1	1	787.406								Bortez/Cont=	>5	>5	>5	Cont/Cont=	nd	nd	>5	=Avg Bort/Cont (1h, 500nM)
HEK293T	bortezomib 1h, 500nM	2	1	826.51								Bortez/Cont=	>5	>5	>5	Cont/Cont=	nd	nd	>5	=Avg Bort/Cont (1h, 500nM)
HEK293T	bortezomib 1h, 500nM	2	1	838.546								Bortez/Cont=	>5	>5	>5	Cont/Cont=	nd	nd	>5	=Avg Bort/Cont (1h, 500nM)
HEK293T	bortezomib 1h, 500nM	2	1	840.508								Bortez/Cont=	>5	>5	>5	Cont/Cont=	nd	nd	>5	=Avg Bort/Cont (1h, 500nM)
HEK293T	bortezomib 1h, 500nM	2	2	859.517								Bortez/Cont=	>5	>5	>5	Cont/Cont=	nd	nd	>5	=Avg Bort/Cont (1h, 500nM)
HEK293T	bortezomib 1h, 500nM	2	3	870.592								Bortez/Cont=	>5	>5	>5	Cont/Cont=	nd	nd	>5	=Avg Bort/Cont (1h, 500nM)
HEK293T	bortezomib 1h, 500nM	3	3	870.594								Bortez/Cont=	>5	>5	>5	Cont/Cont=	nd	nd	>5	=Avg Bort/Cont (1h, 500nM)
HEK293T	bortezomib 1h, 500nM	2	2	874.522								Bortez/Cont=	>5	>5	>5	Cont/Cont=	nd	nd	>5	=Avg Bort/Cont (1h, 500nM)
HEK293T	bortezomib 1h, 500nM	1	1	897.504								Bortez/Cont=	>5	>5	>5	Cont/Cont=	nd	nd	>5	=Avg Bort/Cont (1h, 500nM)
HEK293T	bortezomib 1h, 500nM	2	2	919.54								Bortez/Cont=	>5	>5	>5	Cont/Cont=	nd	nd	>5	=Avg Bort/Cont (1h, 500nM)
HEK293T	bortezomib 1h, 500nM	2	1	925.459								Bortez/Cont=	>5	>5	>5	Cont/Cont=	nd	nd	>5	=Avg Bort/Cont (1h, 500nM)
HEK293T	bortezomib 1h, 500nM	3	1	934.587								Bortez/Cont=	>5	>5	>5	Cont/Cont=	nd	nd	>5	=Avg Bort/Cont (1h, 500nM)
HEK293T	bortezomib 1h, 500nM	3	2	938.59								Bortez/Cont=	>5	>5	>5	Cont/Cont=	nd	nd	>5	=Avg Bort/Cont (1h, 500nM)
HEK293T	bortezomib 1h, 500nM	3	2	938.59								Bortez/Cont=	>5	>5	>5	Cont/Cont=	nd	nd	>5	=Avg Bort/Cont (1h, 500nM)
HEK293T	bortezomib 1h, 500nM	3	1	957.556								Bortez/Cont=	>5	>5	>5	Cont/Cont=	nd	nd	>5	=Avg Bort/Cont (1h, 500nM)
HEK293T	bortezomib 1h, 500nM	2	1	964.543								Bortez/Cont=	>5	>5	>5	Cont/Cont=	nd	nd	>5	=Avg Bort/Cont (1h, 500nM)
HEK293T	bortezomib 1h, 500nM	3	3	973.656								Bortez/Cont=	>5	>5	>5	Cont/Cont=	nd	nd	>5	=Avg Bort/Cont (1h, 500nM)
HEK293T	bortezomib 1h, 500nM	2	1	984.582								Bortez/Cont=	>5	>5	>5	Cont/Cont=	nd	nd	>5	=Avg Bort/Cont (1h, 500nM)
HEK293T	bortezomib 1h, 500nM	2	1	995.587								Bortez/Cont=	>5	>5	>5	Cont/Cont=	nd	nd	>5	=Avg Bort/Cont (1h, 500nM)
HEK293T	bortezomib 1h, 500nM	2	1	998.589								Bortez/Cont=	>5	>5	>5	Cont/Cont=	nd	nd	>5	=Avg Bort/Cont (1h, 500nM)
HEK293T	bortezomib 1h, 500nM	2	1	1005.58								Bortez/Cont=	>5	>5	>5	Cont/Cont=	nd	nd	>5	=Avg Bort/Cont (1h, 500nM)
HEK293T	bortezomib 1h, 500nM	3	1	1006.57								Bortez/Cont=	>5	>5	>5	Cont/Cont=	nd	nd	>5	=Avg Bort/Cont (1h, 500nM)
HEK293T	bortezomib 1h, 500nM	3	3	1007.63								Bortez/Cont=	>5	>5	>5	Cont/Cont=	nd	nd	>5	=Avg Bort/Cont (1h, 500nM)
HEK293T	bortezomib 1h, 500nM	3	3	1009.72								Bortez/Cont=	>5	>5	>5	Cont/Cont=	nd	nd	>5	=Avg Bort/Cont (1h, 500nM)
HEK293T	bortezomib 1h, 500nM	3	1	1011.59								Bortez/Cont=	>5	>5	>5	Cont/Cont=	nd	nd	>5	=Avg Bort/Cont (1h, 500nM)
HEK293T	bortezomib 1h, 500nM	2	2	1027.67								Bortez/Cont=	>5	>5	>5	Cont/Cont=	nd	nd	>5	=Avg Bort/Cont (1h, 500nM)
HEK293T	bortezomib 1h, 500nM	3	3	1027.7								Bortez/Cont=	>5	>5	>5	Cont/Cont=	nd	nd	>5	=Avg Bort/Cont (1h, 500nM)
HEK293T	bortezomib 1h, 500nM	2	1	1031.59								Bortez/Cont=	>5	>5	>5	Cont/Cont=	nd	nd	>5	=Avg Bort/Cont (1h, 500nM)
HEK293T	bortezomib 1h, 500nM	2	1	1041.63								Bortez/Cont=	>5	>5	>5	Cont/Cont=	nd	nd	>5	=Avg Bort/Cont (1h, 500nM)
HEK293T	bortezomib 1h, 500nM	3	2	1041.65								Bortez/Cont=	>5	>5	>5	Cont/Cont=	nd	nd	>5	=Avg Bort/Cont (1h, 500nM)
HEK293T	bortezomib 1h, 500nM	2	2	1058.63								Bortez/Cont=	>5	>5	>5	Cont/Cont=	nd	nd	>5	=Avg Bort/Cont (1h, 500nM)
HEK293T	bortezomib 1h, 500nM	2	2	1072.6								Bortez/Cont=	>5	>5	>5	Cont/Cont=	nd	nd	>5	=Avg Bort/Cont (1h, 500nM)
HEK293T	bortezomib 1h, 500nM	3	2	1075.6								Bortez/Cont=	>5	>5	>5	Cont/Cont=	nd	nd	>5	=Avg Bort/Cont (1h, 500nM)
HEK293T	bortezomib 1h, 500nM	2	2	1075.64								Bortez/Cont=	>5	>5	>5	Cont/Cont=	nd	nd	>5	=Avg Bort/Cont (1h, 500nM)
HEK293T	bortezomib 1h, 500nM	3	2	1077.7								Bortez/Cont=	>5	>5	>5	Cont/Cont=	nd	nd	>5	=Avg Bort/Cont (1h, 500nM)
HEK293T	bortezomib 1h, 500nM	2	1	1079.59								Bortez/Cont=	>5	>5	>5	Cont/Cont=	nd	nd	>5	=Avg Bort/Cont (1h, 500nM)
HEK293T	bortezomib 1h, 500nM	2	2	1089.67								Bortez/Cont=	>5	>5	>5	Cont/Cont=	nd	nd	>5	=Avg Bort/Cont (1h, 500nM)
HEK293T	bortezomib 1h, 500nM	3	2	1092.63								Bortez/Cont=	>5	>5	>5	Cont/Cont=	nd	nd	>5	=Avg Bort/Cont (1h, 500nM)
HEK293T	bortezomib 1h, 500nM	3	2	1095.69								Bortez/Cont=	>5	>5	>5	Cont/Cont=	nd	nd	>5	=Avg Bort/Cont (1h, 500nM)
HEK293T	bortezomib 1h, 500nM	3	2	1105.64								Bortez/Cont=	>5	>5	>5	Cont/Cont=	nd	nd	>5	=Avg Bort/Cont (1h, 500nM)
HEK293T	bortezomib 1h, 500nM	3	1	1109.64								Bortez/Cont=	6.9	6	5	Cont/Cont=	1.2	0.8	>5	=Avg Bort/Cont (1h, 500nM)
HEK293T	bortezomib 1h, 500nM	3	3	1118.68								Bortez/Cont=	>5	>5	>5	Cont/Cont=	nd	nd	>5	=Avg Bort/Cont (1h, 500nM)
HEK293T	bortezomib 1h, 500nM	2	3	1118.7								Bortez/Cont=	>5	>5	>5	Cont/Cont=	nd	nd	>5	=Avg Bort/Cont (1h, 500nM)
HEK293T	bortezomib 1h, 500nM	3	1	1126.67								Bortez/Cont=	>5	>5	>5	Cont/Cont=	nd	nd	>5	=Avg Bort/Cont (1h, 500nM)
HEK293T	bortezomib 1h, 500nM	2	1	1126.68								Bortez/Cont=	>5	>5	>5	Cont/Cont=	nd	nd	>5	=Avg Bort/Cont (1h, 500nM)
HEK293T	bortezomib 1h, 500nM	3	2	1145.66								Bortez/Cont=	>5	>5	>5	Cont/Cont=	nd	nd	>5	=Avg Bort/Cont (1h, 500nM)
HEK293T	bortezomib 1h, 500nM	3	1	1145.68								Bortez/Cont=	7	5.55556	4.88889	Cont/Cont=	1.11111	0.888889	>5	=Avg Bort/Cont (1h, 500nM)
HEK293T	bortezomib 1h, 500nM	3	3	1186.74								Bortez/Cont=	>5	>5	>5	Cont/Cont=	nd	nd	>5	=Avg Bort/Cont (1h, 500nM)
HEK293T	bortezomib 1h, 500nM	2	2	1190.65								Bortez/Cont=	>5	>5	>5	Cont/Cont=	nd	nd	>5	=Avg Bort/Cont (1h, 500nM)
HEK293T	bortezomib 1h, 500nM	3	3	1196.82								Bortez/Cont=	>5	>5	>5	Cont/Cont=	nd	nd	>5	=Avg Bort/Cont (1h, 500nM)
HEK293T	bortezomib 1h, 500nM	3	2	1211.72								Bortez/Cont=	>5	>5	>5	Cont/Cont=	nd	nd	>5	=Avg Bort/Cont (1h, 500nM)
HEK293T	bortezomib 1h, 500nM	3	3	1213.75								Bortez/Cont=	>5	>5	>5	Cont/Cont=	nd	nd	>5	=Avg Bort/Cont (1h, 500nM)
HEK293T	bortezomib 1h, 500nM	2	1	1215.59								Bortez/Cont=	>5	>5	>5	Cont/Cont=	nd	nd	>5	=Avg Bort/Cont (1h, 500nM)
HEK293T	bortezomib 1h, 500nM	3	3	1217.74								Bortez/Cont=	>5	>5	>5	Cont/Cont=	nd	nd	>5	=Avg Bort/Cont (1h, 500nM)
HEK293T	bortezomib 1h, 500nM	2	1	1227.62								Bortez/Cont=	>5	>5	>5	Cont/Cont=	nd	nd	>5	=Avg Bort/Cont (1h, 500nM)
HEK293T	bortezomib 1h, 500nM	3	3	1239.71								Bortez/Cont=	>5	>5	>5	Cont/Cont=	nd	nd	>5	=Avg Bort/Cont (1h, 500nM)
HEK293T	bortezomib 1h, 500nM	2	2	1243.69								Bortez/Cont=	>5	>5	>5	Cont/Cont=	nd	nd	>5	=Avg Bort/Cont (1h, 500nM)
HEK293T	bortezomib 1h, 500nM	2	1	1257.68								Bortez/Cont=	>5	>5	>5	Cont/Cont=	nd	nd	>5	=Avg Bort/Cont (1h, 500nM)
HEK293T	bortezomib 1h, 500nM	3	3	1269.72								Bortez/Cont=	>5	>5	>5	Cont/Cont=	nd	nd	>5	=Avg Bort/Cont (1h, 500nM)
HEK293T	bortezomib 1h, 500nM	2	2	1269.76								Bortez/Cont=	>5	>5	>5	Cont/Cont=	nd	nd	>5	=Avg Bort/Cont (1h, 500nM)
HEK293T	bortezomib 1h, 500nM	2	3	1269.79								Bortez/Cont=	>5	>5	>5	Cont/Cont=	nd	nd	>5	=Avg Bort/Cont (1h, 500nM)
HEK293T	bortezomib 1h, 500nM	3	2	1280.73								Bortez/Cont=	>5	>5	>5	Cont/Cont=	nd	nd	>5	=Avg Bort/Cont (1h, 500nM)
HEK293T	bortezomib 1h, 500nM	3	2	1281.75								Bortez/Cont=	>5	>5	>5	Cont/Cont=	nd	nd	>5	=Avg Bort/Cont (1h, 500nM)
HEK293T	bortezomib 1h, 500nM	2	1	1293.83								Bortez/Cont=	>5	>5	>5	Cont/Cont=	nd	nd	>5	=Avg Bort/Cont (1h, 500nM)
HEK293T	bortezomib 1h, 500nM	2	1	1293.83								Bortez/Cont=	>5	>5	>5	Cont/Cont=	nd	nd	>5	=Avg Bort/Cont (1h, 500nM)
HEK293T	bortezomib 1h, 500nM	3	1	1306.64								Bortez/Cont=	>5	>5	>5	Cont/Cont=	nd	nd	>5	=Avg Bort/Cont (1h, 500nM)
HEK293T	bortezomib 1h, 500nM	2	2	1313.73								Bortez/Cont=	>5	>5	>5	Cont/Cont=	nd	nd	>5	=Avg Bort/Cont (1h, 500nM)
HEK293T	bortezomib 1h, 500nM	3	1	1317.64								Bortez/Cont=	>5	>5	>5	Cont/Cont=	nd	nd	>5	=Avg Bort/Cont (1h, 500nM)
HEK293T	bortezomib 1h, 500nM	3	2	1335.73								Bortez/Cont=	>5	>5	>5	Cont/Cont=	nd	nd	>5	=Avg Bort/Cont (1h, 500nM)
HEK293T	bortezomib 1h, 500nM	4	1	1337.72								Bortez/Cont=	6.9	5	5.5	Cont/Cont=	1	1	>5	=Avg Bort/Cont (1h, 500nM)
HEK293T	bortezomib 1h, 500nM	3	2	1337.77								Bortez/Cont=	>5	>5	>5	Cont/Cont=	nd	nd	>5	=Avg Bort/Cont (1h, 500nM)
HEK293T	bortezomib 1h, 500nM	4	1	1341.8								Bortez/Cont=	>5	>5	>5	Cont/Cont=	nd	nd	>5	=Avg Bort/Cont (1h, 500nM)
HEK293T	bortezomib 1h, 500nM	3	3	1345.8								Bortez/Cont=	>5	>5	>5	Cont/Cont=	nd	nd	>5	=Avg Bort/Cont (1h, 500nM)
HEK293T	bortezomib 1h, 500nM	2	2	1358.75								Bortez/Cont=	>5	>5	>5	Cont/Cont=	nd	nd	>5	=Avg Bort/Cont (1h, 500nM)
HEK293T	bortezomib 1h, 500nM	2	3	1363.76								Bortez/Cont=	>5	>5	>5	Cont/Cont=	nd	nd	>5	=Avg Bort/Cont (1h, 500nM)
HEK293T	bortezomib 1h, 500nM	2	2	1370.73								Bortez/Cont=	>5	>5	>5	Cont/Cont=	nd	nd	>5	=Avg Bort/Cont (1h, 500nM)
HEK293T	bortezomib 1h, 500nM	3	3	1371.76								Bortez/Cont=	>5	>5	>5	Cont/Cont=	nd	nd	>5	=Avg Bort/Cont (1h, 500nM)
HEK293T	bortezomib 1h, 500nM	4	5	1379.05								Bortez/Cont=	>5	>5	>5	Cont/Cont=	nd	nd	>5	=Avg Bort/Cont (1h, 500nM)
HEK293T	bortezomib 1h, 500nM	3	3	1383.86								Bortez/Cont=	>5	>5	>5	Cont/Cont=	nd	nd	>5	=Avg Bort/Cont (1h, 500nM)
HEK293T	bortezomib 1h, 500nM	3	1	1392.75								Bortez/Cont=	>5	>5	>5	Cont/Cont=	nd	nd	>5	=Avg Bort/Cont (1h, 500nM)
HEK293T	bortezomib 1h, 500nM	3	1	1398.69								Bortez/Cont=	>5	>5	>5	Cont/Cont=	nd	nd	>5	=Avg Bort/Cont (1h, 500nM)
HEK293T	bortezomib 1h, 500nM	4	3	1400.88								Bortez/Cont=	>5	>5	>5	Cont/Cont=	nd	nd	>5	=Avg Bort/Cont (1h, 500nM)
HEK293T	bortezomib 1h, 500nM	3	3	1400.89								Bortez/Cont=	>5	>5	>5	Cont/Cont=	nd	nd	>5	=Avg Bort/Cont (1h, 500nM)
HEK293T	bortezomib 1h, 500nM	3	1	1413.74								Bortez/Cont=	>5	>5	>5	Cont/Cont=	nd	nd	>5	=Avg Bort/Cont (1h, 500nM)
HEK293T	bortezomib 1h, 500nM	2	1	1430.75								Bortez/Cont=	>5	>5	>5	Cont/Cont=	nd	nd	>5	=Avg Bort/Cont (1h, 500nM)
HEK293T	bortezomib 1h, 500nM	3	2	1445.81								Bortez/Cont=	>5	>5	>5	Cont/Cont=	nd	nd	>5	=Avg Bort/Cont (1h, 500nM)
HEK293T	bortezomib 1h, 500nM	3	3	1454.89								Bortez/Cont=	>5	>5	>5	Cont/Cont=	nd	nd	>5	=Avg Bort/Cont (1h, 500nM)
HEK293T	bortezomib 1h, 500nM	3	3	1455.81								Bortez/Cont=	>5	>5	>5	Cont/Cont=	nd	nd	>5	=Avg Bort/Cont (1h, 500nM)
HEK293T	bortezomib 1h, 500nM	3	1	1455.81								Bortez/Cont=	>5	>5	>5	Cont/Cont=	nd	nd	>5	=Avg Bort/Cont (1h, 500nM)
HEK293T	bortezomib 1h, 500nM	2	3	1455.86								Bortez/Cont=	>5	>5	>5	Cont/Cont=	nd	nd	>5	=Avg Bort/Cont (1h, 500nM)
HEK293T	bortezomib 1h, 500nM	2	2	1468.77								Bortez/Cont=	>5	>5	>5	Cont/Cont=	nd	nd	>5	=Avg Bort/Cont (1h, 500nM)
HEK293T	bortezomib 1h, 500nM	4	2	1468.85								Bortez/Cont=	>5	>5	>5	Cont/Cont=	nd	nd	>5	=Avg Bort/Cont (1h, 500nM)
HEK293T	bortezomib 1h, 500nM	4	2	1468.85								Bortez/Cont=	>5	>5	>5	Cont/Cont=	nd	nd	>5	=Avg Bort/Cont (1h, 500nM)
HEK293T	bortezomib 1h, 500nM	3	2	1472.74								Bortez/Cont=	>5	>5	>5	Cont/Cont=	nd	nd	>5	=Avg Bort/Cont (1h, 500nM)
HEK293T	bortezomib 1h, 500nM	3	2	1474.89								Bortez/Cont=	>5	>5	>5	Cont/Cont=	nd	nd	>5	=Avg Bort/Cont (1h, 500nM)
HEK293T	bortezomib 1h, 500nM	3	2	1475.86								Bortez/Cont=	>5	>5	>5	Cont/Cont=	nd	nd	>5	=Avg Bort/Cont (1h, 500nM)
HEK293T	bortezomib 1h, 500nM	3	2	1476.78								Bortez/Cont=	>5	>5	>5	Cont/Cont=	nd	nd	>5	=Avg Bort/Cont (1h, 500nM)
HEK293T	bortezomib 1h, 500nM	2	1	1495.71								Bortez/Cont=	>5	>5	>5	Cont/Cont=	nd	nd	>5	=Avg Bort/Cont (1h, 500nM)
HEK293T	bortezomib 1h, 500nM	3	1	1497.75								Bortez/Cont=	>5	>5	>5	Cont/Cont=	nd	nd	>5	=Avg Bort/Cont (1h, 500nM)
HEK293T	bortezomib 1h, 500nM	3	1	1503.9								Bortez/Cont=	>5	>5	>5	Cont/Cont=	nd	nd	>5	=Avg Bort/Cont (1h, 500nM)
HEK293T	bortezomib 1h, 500nM	2	4	1513.96								Bortez/Cont=	>5	>5	>5	Cont/Cont=	nd	nd	>5	=Avg Bort/Cont (1h, 500nM)
HEK293T	bortezomib 1h, 500nM	5	3	1514.99								Bortez/Cont=	>5	>5	>5	Cont/Cont=	nd	nd	>5	=Avg Bort/Cont (1h, 500nM)
HEK293T	bortezomib 1h, 500nM	3	2	1522.89								Bortez/Cont=	>5	>5	>5	Cont/Cont=	nd	nd	>5	=Avg Bort/Cont (1h, 500nM)
HEK293T	bortezomib 1h, 500nM	3	2	1523.87								Bortez/Cont=	>5	>5	>5	Cont/Cont=	nd	nd	>5	=Avg Bort/Cont (1h, 500nM)
HEK293T	bortezomib 1h, 500nM	3	2	1534.85								Bortez/Cont=	>5	>5	>5	Cont/Cont=	nd	nd	>5	=Avg Bort/Cont (1h, 500nM)
HEK293T	bortezomib 1h, 500nM	4	1	1536.85								Bortez/Cont=	>5	>5	>5	Cont/Cont=	nd	nd	>5	=Avg Bort/Cont (1h, 500nM)
HEK293T	bortezomib 1h, 500nM	2	1	1537.63								Bortez/Cont=	>5	>5	>5	Cont/Cont=	nd	nd	>5	=Avg Bort/Cont (1h, 500nM)
HEK293T	bortezomib 1h, 500nM	3	1	1539.74								Bortez/Cont=	>5	>5	>5	Cont/Cont=	nd	nd	>5	=Avg Bort/Cont (1h, 500nM)
HEK293T	bortezomib 1h, 500nM	3	3	1550.89								Bortez/Cont=	>5	>5	>5	Cont/Cont=	nd	nd	>5	=Avg Bort/Cont (1h, 500nM)
HEK293T	bortezomib 1h, 500nM	3	2	1553.85								Bortez/Cont=	>5	>5	>5	Cont/Cont=	nd	nd	>5	=Avg Bort/Cont (1h, 500nM)
HEK293T	bortezomib 1h, 500nM	3	2	1555.85								Bortez/Cont=	>5	>5	>5	Cont/Cont=	nd	nd	>5	=Avg Bort/Cont (1h, 500nM)
HEK293T	bortezomib 1h, 500nM	3	2	1557.92								Bortez/Cont=	>5	>5	>5	Cont/Cont=	nd	nd	>5	=Avg Bort/Cont (1h, 500nM)
HEK293T	bortezomib 1h, 500nM	3	1	1564.84								Bortez/Cont=	>5	>5	>5	Cont/Cont=	nd	nd	>5	=Avg Bort/Cont (1h, 500nM)
HEK293T	bortezomib 1h, 500nM	2	2	1566.89								Bortez/Cont=	>5	>5	>5	Cont/Cont=	nd	nd	>5	=Avg Bort/Cont (1h, 500nM)
HEK293T	bortezomib 1h, 500nM	3	4	1568.93								Bortez/Cont=	>5	>5	>5	Cont/Cont=	nd	nd	>5	=Avg Bort/Cont (1h, 500nM)
HEK293T	bortezomib 1h, 500nM	3	2	1570.88								Bortez/Cont=	>5	>5	>5	Cont/Cont=	nd	nd	>5	=Avg Bort/Cont (1h, 500nM)
HEK293T	bortezomib 1h, 500nM	2	3	1573.94								Bortez/Cont=	>5	>5	>5	Cont/Cont=	nd	nd	>5	=Avg Bort/Cont (1h, 500nM)
HEK293T	bortezomib 1h, 500nM	3	3	1573.96								Bortez/Cont=	>5	>5	>5	Cont/Cont=	nd	nd	>5	=Avg Bort/Cont (1h, 500nM)
HEK293T	bortezomib 1h, 500nM	5	2	1583.02								Bortez/Cont=	>5	>5	>5	Cont/Cont=	nd	nd	>5	=Avg Bort/Cont (1h, 500nM)
HEK293T	bortezomib 1h, 500nM	2	2	1584.86								Bortez/Cont=	3.80952	4.28571	7.14286	Cont/Cont=	0.952381	1.04762	>5	=Avg Bort/Cont (1h, 500nM)
HEK293T	bortezomib 1h, 500nM	2	4	1585								Bortez/Cont=	>5	>5	>5	Cont/Cont=	nd	nd	>5	=Avg Bort/Cont (1h, 500nM)
HEK293T	bortezomib 1h, 500nM	3	3	1588.9								Bortez/Cont=	>5	>5	>5	Cont/Cont=	nd	nd	>5	=Avg Bort/Cont (1h, 500nM)
HEK293T	bortezomib 1h, 500nM	3	3	1590.94								Bortez/Cont=	>5	>5	>5	Cont/Cont=	nd	nd	>5	=Avg Bort/Cont (1h, 500nM)
HEK293T	bortezomib 1h, 500nM	2	2	1615.87								Bortez/Cont=	>5	>5	>5	Cont/Cont=	nd	nd	>5	=Avg Bort/Cont (1h, 500nM)
HEK293T	bortezomib 1h, 500nM	5	5	1621.12								Bortez/Cont=	>5	>5	>5	Cont/Cont=	nd	nd	>5	=Avg Bort/Cont (1h, 500nM)
HEK293T	bortezomib 1h, 500nM	4	5	1621.14								Bortez/Cont=	>5	>5	>5	Cont/Cont=	nd	nd	>5	=Avg Bort/Cont (1h, 500nM)
HEK293T	bortezomib 1h, 500nM	4	3	1622.05								Bortez/Cont=	>5	>5	>5	Cont/Cont=	nd	nd	>5	=Avg Bort/Cont (1h, 500nM)
HEK293T	bortezomib 1h, 500nM	3	2	1626.85								Bortez/Cont=	>5	>5	>5	Cont/Cont=	nd	nd	>5	=Avg Bort/Cont (1h, 500nM)
HEK293T	bortezomib 1h, 500nM	3	3	1629.92								Bortez/Cont=	>5	>5	>5	Cont/Cont=	nd	nd	>5	=Avg Bort/Cont (1h, 500nM)
HEK293T	bortezomib 1h, 500nM	4	2	1630.96								Bortez/Cont=	>5	>5	>5	Cont/Cont=	nd	nd	>5	=Avg Bort/Cont (1h, 500nM)
HEK293T	bortezomib 1h, 500nM	4	2	1649.89								Bortez/Cont=	>5	>5	>5	Cont/Cont=	nd	nd	>5	=Avg Bort/Cont (1h, 500nM)
HEK293T	bortezomib 1h, 500nM	5	1	1650.97								Bortez/Cont=	>5	>5	>5	Cont/Cont=	nd	nd	>5	=Avg Bort/Cont (1h, 500nM)
HEK293T	bortezomib 1h, 500nM	4	3	1652.93								Bortez/Cont=	>5	>5	>5	Cont/Cont=	nd	nd	>5	=Avg Bort/Cont (1h, 500nM)
HEK293T	bortezomib 1h, 500nM	4	4	1655.97								Bortez/Cont=	>5	>5	>5	Cont/Cont=	nd	nd	>5	=Avg Bort/Cont (1h, 500nM)
HEK293T	bortezomib 1h, 500nM	3	4	1656								Bortez/Cont=	>5	>5	>5	Cont/Cont=	nd	nd	>5	=Avg Bort/Cont (1h, 500nM)
HEK293T	bortezomib 1h, 500nM	3	2	1667.93								Bortez/Cont=	>5	>5	>5	Cont/Cont=	nd	nd	>5	=Avg Bort/Cont (1h, 500nM)
HEK293T	bortezomib 1h, 500nM	2	2	1667.95								Bortez/Cont=	>5	>5	>5	Cont/Cont=	nd	nd	>5	=Avg Bort/Cont (1h, 500nM)
HEK293T	bortezomib 1h, 500nM	3	3	1668.94								Bortez/Cont=	>5	>5	>5	Cont/Cont=	nd	nd	>5	=Avg Bort/Cont (1h, 500nM)
HEK293T	bortezomib 1h, 500nM	3	3	1668.95								Bortez/Cont=	>5	>5	>5	Cont/Cont=	nd	nd	>5	=Avg Bort/Cont (1h, 500nM)
HEK293T	bortezomib 1h, 500nM	3	3	1668.96								Bortez/Cont=	>5	>5	>5	Cont/Cont=	nd	nd	>5	=Avg Bort/Cont (1h, 500nM)
HEK293T	bortezomib 1h, 500nM	3	2	1677.94								Bortez/Cont=	>5	>5	>5	Cont/Cont=	nd	nd	>5	=Avg Bort/Cont (1h, 500nM)
HEK293T	bortezomib 1h, 500nM	2	2	1677.95								Bortez/Cont=	>5	>5	>5	Cont/Cont=	nd	nd	>5	=Avg Bort/Cont (1h, 500nM)
HEK293T	bortezomib 1h, 500nM	4	2	1690								Bortez/Cont=	>5	>5	>5	Cont/Cont=	nd	nd	>5	=Avg Bort/Cont (1h, 500nM)
HEK293T	bortezomib 1h, 500nM	3	2	1693.91								Bortez/Cont=	>5	>5	>5	Cont/Cont=	nd	nd	>5	=Avg Bort/Cont (1h, 500nM)
HEK293T	bortezomib 1h, 500nM	3	4	1702.03								Bortez/Cont=	>5	>5	>5	Cont/Cont=	nd	nd	>5	=Avg Bort/Cont (1h, 500nM)
HEK293T	bortezomib 1h, 500nM	4	4	1702.04								Bortez/Cont=	>5	>5	>5	Cont/Cont=	nd	nd	>5	=Avg Bort/Cont (1h, 500nM)
HEK293T	bortezomib 1h, 500nM	2	1	1715.87								Bortez/Cont=	>5	>5	>5	Cont/Cont=	nd	nd	>5	=Avg Bort/Cont (1h, 500nM)
HEK293T	bortezomib 1h, 500nM	3	2	1723								Bortez/Cont=	>5	>5	>5	Cont/Cont=	nd	nd	>5	=Avg Bort/Cont (1h, 500nM)
HEK293T	bortezomib 1h, 500nM	4	3	1723.99								Bortez/Cont=	>5	>5	>5	Cont/Cont=	nd	nd	>5	=Avg Bort/Cont (1h, 500nM)
HEK293T	bortezomib 1h, 500nM	2	1	1724.86								Bortez/Cont=	>5	>5	>5	Cont/Cont=	nd	nd	>5	=Avg Bort/Cont (1h, 500nM)
HEK293T	bortezomib 1h, 500nM	4	4	1740.06								Bortez/Cont=	>5	>5	>5	Cont/Cont=	nd	nd	>5	=Avg Bort/Cont (1h, 500nM)
HEK293T	bortezomib 1h, 500nM	4	1	1742.91								Bortez/Cont=	>5	>5	>5	Cont/Cont=	nd	nd	>5	=Avg Bort/Cont (1h, 500nM)
HEK293T	bortezomib 1h, 500nM	3	1	1742.97								Bortez/Cont=	>5	>5	>5	Cont/Cont=	nd	nd	>5	=Avg Bort/Cont (1h, 500nM)
HEK293T	bortezomib 1h, 500nM	5	3	1757.13								Bortez/Cont=	>5	>5	>5	Cont/Cont=	nd	nd	>5	=Avg Bort/Cont (1h, 500nM)
HEK293T	bortezomib 1h, 500nM	2	1	1762.82								Bortez/Cont=	>5	>5	>5	Cont/Cont=	nd	nd	>5	=Avg Bort/Cont (1h, 500nM)
HEK293T	bortezomib 1h, 500nM	3	1	1774.89								Bortez/Cont=	>5	>5	>5	Cont/Cont=	nd	nd	>5	=Avg Bort/Cont (1h, 500nM)
HEK293T	bortezomib 1h, 500nM	3	3	1782.05								Bortez/Cont=	>5	>5	>5	Cont/Cont=	nd	nd	>5	=Avg Bort/Cont (1h, 500nM)
HEK293T	bortezomib 1h, 500nM	4	4	1801.09								Bortez/Cont=	>5	>5	>5	Cont/Cont=	nd	nd	>5	=Avg Bort/Cont (1h, 500nM)
HEK293T	bortezomib 1h, 500nM	3	4	1801.12								Bortez/Cont=	>5	>5	>5	Cont/Cont=	nd	nd	>5	=Avg Bort/Cont (1h, 500nM)
HEK293T	bortezomib 1h, 500nM	2	2	1810.87								Bortez/Cont=	>5	>5	>5	Cont/Cont=	nd	nd	>5	=Avg Bort/Cont (1h, 500nM)
HEK293T	bortezomib 1h, 500nM	5	2	1825.14								Bortez/Cont=	>5	>5	>5	Cont/Cont=	nd	nd	>5	=Avg Bort/Cont (1h, 500nM)
HEK293T	bortezomib 1h, 500nM	3	3	1853.07								Bortez/Cont=	>5	>5	>5	Cont/Cont=	nd	nd	>5	=Avg Bort/Cont (1h, 500nM)
HEK293T	bortezomib 1h, 500nM	4	3	1854.92								Bortez/Cont=	>5	>5	>5	Cont/Cont=	nd	nd	>5	=Avg Bort/Cont (1h, 500nM)
HEK293T	bortezomib 1h, 500nM	2	1	1856.03								Bortez/Cont=	>5	>5	>5	Cont/Cont=	nd	nd	>5	=Avg Bort/Cont (1h, 500nM)
HEK293T	bortezomib 1h, 500nM	4	4	1870.11								Bortez/Cont=	>5	>5	>5	Cont/Cont=	nd	nd	>5	=Avg Bort/Cont (1h, 500nM)
HEK293T	bortezomib 1h, 500nM	2	2	1902.94								Bortez/Cont=	>5	>5	>5	Cont/Cont=	nd	nd	>5	=Avg Bort/Cont (1h, 500nM)
HEK293T	bortezomib 1h, 500nM	2	1	1920.86								Bortez/Cont=	>5	>5	>5	Cont/Cont=	nd	nd	>5	=Avg Bort/Cont (1h, 500nM)
HEK293T	bortezomib 1h, 500nM	3	3	1924.01								Bortez/Cont=	>5	>5	>5	Cont/Cont=	nd	nd	>5	=Avg Bort/Cont (1h, 500nM)
HEK293T	bortezomib 1h, 500nM	3	3	1926.05								Bortez/Cont=	>5	>5	>5	Cont/Cont=	nd	nd	>5	=Avg Bort/Cont (1h, 500nM)
HEK293T	bortezomib 1h, 500nM	3	3	1954.14								Bortez/Cont=	>5	>5	>5	Cont/Cont=	nd	nd	>5	=Avg Bort/Cont (1h, 500nM)
HEK293T	bortezomib 1h, 500nM	3	2	1965.08								Bortez/Cont=	>5	>5	>5	Cont/Cont=	nd	nd	>5	=Avg Bort/Cont (1h, 500nM)
HEK293T	bortezomib 1h, 500nM	4	2	1965.08								Bortez/Cont=	>5	>5	>5	Cont/Cont=	nd	nd	>5	=Avg Bort/Cont (1h, 500nM)
HEK293T	bortezomib 1h, 500nM	2	2	1965.09								Bortez/Cont=	>5	>5	>5	Cont/Cont=	nd	nd	>5	=Avg Bort/Cont (1h, 500nM)
HEK293T	bortezomib 1h, 500nM	5	1	1994.07								Bortez/Cont=	>5	>5	>5	Cont/Cont=	nd	nd	>5	=Avg Bort/Cont (1h, 500nM)
HEK293T	bortezomib 1h, 500nM	2	2	1996.97								Bortez/Cont=	>5	>5	>5	Cont/Cont=	nd	nd	>5	=Avg Bort/Cont (1h, 500nM)
HEK293T	bortezomib 1h, 500nM	4	2	2022.99								Bortez/Cont=	>5	>5	>5	Cont/Cont=	nd	nd	>5	=Avg Bort/Cont (1h, 500nM)
HEK293T	bortezomib 1h, 500nM	3	3	2039.13								Bortez/Cont=	>5	>5	>5	Cont/Cont=	nd	nd	>5	=Avg Bort/Cont (1h, 500nM)
HEK293T	bortezomib 1h, 500nM	3	3	2039.14								Bortez/Cont=	>5	>5	>5	Cont/Cont=	nd	nd	>5	=Avg Bort/Cont (1h, 500nM)
HEK293T	bortezomib 1h, 500nM	3	2	2049.06								Bortez/Cont=	>5	>5	>5	Cont/Cont=	nd	nd	>5	=Avg Bort/Cont (1h, 500nM)
HEK293T	bortezomib 1h, 500nM	2	2	2060.99								Bortez/Cont=	>5	>5	>5	Cont/Cont=	nd	nd	>5	=Avg Bort/Cont (1h, 500nM)
HEK293T	bortezomib 1h, 500nM	4	3	2063.06								Bortez/Cont=	>5	>5	>5	Cont/Cont=	nd	nd	>5	=Avg Bort/Cont (1h, 500nM)
HEK293T	bortezomib 1h, 500nM	3	3	2066.19								Bortez/Cont=	>5	>5	>5	Cont/Cont=	nd	nd	>5	=Avg Bort/Cont (1h, 500nM)
HEK293T	bortezomib 1h, 500nM	4	3	2066.2								Bortez/Cont=	>5	>5	>5	Cont/Cont=	nd	nd	>5	=Avg Bort/Cont (1h, 500nM)
HEK293T	bortezomib 1h, 500nM	2	2	2087.06								Bortez/Cont=	>5	>5	>5	Cont/Cont=	nd	nd	>5	=Avg Bort/Cont (1h, 500nM)
HEK293T	bortezomib 1h, 500nM	3	1	2100.87								Bortez/Cont=	>5	>5	>5	Cont/Cont=	nd	nd	>5	=Avg Bort/Cont (1h, 500nM)
HEK293T	bortezomib 1h, 500nM	3	2	2104.09								Bortez/Cont=	>5	>5	>5	Cont/Cont=	nd	nd	>5	=Avg Bort/Cont (1h, 500nM)
HEK293T	bortezomib 1h, 500nM	3	4	2127.1								Bortez/Cont=	>5	>5	>5	Cont/Cont=	nd	nd	>5	=Avg Bort/Cont (1h, 500nM)
HEK293T	bortezomib 1h, 500nM	4	4	2127.11								Bortez/Cont=	>5	>5	>5	Cont/Cont=	nd	nd	>5	=Avg Bort/Cont (1h, 500nM)
HEK293T	bortezomib 1h, 500nM	3	3	2136.11								Bortez/Cont=	>5	>5	>5	Cont/Cont=	nd	nd	>5	=Avg Bort/Cont (1h, 500nM)
HEK293T	bortezomib 1h, 500nM	4	6	2155.4								Bortez/Cont=	>5	>5	>5	Cont/Cont=	nd	nd	>5	=Avg Bort/Cont (1h, 500nM)
HEK293T	bortezomib 1h, 500nM	5	6	2155.42								Bortez/Cont=	>5	>5	>5	Cont/Cont=	nd	nd	>5	=Avg Bort/Cont (1h, 500nM)
HEK293T	bortezomib 1h, 500nM	3	2	2170.04								Bortez/Cont=	>5	>5	>5	Cont/Cont=	nd	nd	>5	=Avg Bort/Cont (1h, 500nM)
HEK293T	bortezomib 1h, 500nM	2	1	2171.1								Bortez/Cont=	>5	>5	>5	Cont/Cont=	nd	nd	>5	=Avg Bort/Cont (1h, 500nM)
HEK293T	bortezomib 1h, 500nM	4	4	2182.29								Bortez/Cont=	>5	>5	>5	Cont/Cont=	nd	nd	>5	=Avg Bort/Cont (1h, 500nM)
HEK293T	bortezomib 1h, 500nM	3	4	2182.35								Bortez/Cont=	>5	>5	>5	Cont/Cont=	nd	nd	>5	=Avg Bort/Cont (1h, 500nM)
HEK293T	bortezomib 1h, 500nM	3	4	2182.35								Bortez/Cont=	>5	>5	>5	Cont/Cont=	nd	nd	>5	=Avg Bort/Cont (1h, 500nM)
HEK293T	bortezomib 1h, 500nM	2	1	2221.99								Bortez/Cont=	>5	>5	>5	Cont/Cont=	nd	nd	>5	=Avg Bort/Cont (1h, 500nM)
HEK293T	bortezomib 1h, 500nM	2	3	2236.85								Bortez/Cont=	>5	>5	>5	Cont/Cont=	nd	nd	>5	=Avg Bort/Cont (1h, 500nM)
HEK293T	bortezomib 1h, 500nM	4	4	2243.33								Bortez/Cont=	>5	>5	>5	Cont/Cont=	nd	nd	>5	=Avg Bort/Cont (1h, 500nM)
HEK293T	bortezomib 1h, 500nM	3	3	2259.14								Bortez/Cont=	>5	>5	>5	Cont/Cont=	nd	nd	>5	=Avg Bort/Cont (1h, 500nM)
HEK293T	bortezomib 1h, 500nM	4	3	2270.21								Bortez/Cont=	>5	>5	>5	Cont/Cont=	nd	nd	>5	=Avg Bort/Cont (1h, 500nM)
HEK293T	bortezomib 1h, 500nM	2	1	2282.1								Bortez/Cont=	>5	>5	>5	Cont/Cont=	nd	nd	>5	=Avg Bort/Cont (1h, 500nM)
HEK293T	bortezomib 1h, 500nM	3	4	2284.33								Bortez/Cont=	>5	>5	>5	Cont/Cont=	nd	nd	>5	=Avg Bort/Cont (1h, 500nM)
HEK293T	bortezomib 1h, 500nM	4	4	2284.36								Bortez/Cont=	>5	>5	>5	Cont/Cont=	nd	nd	>5	=Avg Bort/Cont (1h, 500nM)
HEK293T	bortezomib 1h, 500nM	4	3	2293.13								Bortez/Cont=	>5	>5	>5	Cont/Cont=	nd	nd	>5	=Avg Bort/Cont (1h, 500nM)
HEK293T	bortezomib 1h, 500nM	2	2	2293.23								Bortez/Cont=	>5	>5	>5	Cont/Cont=	nd	nd	>5	=Avg Bort/Cont (1h, 500nM)
HEK293T	bortezomib 1h, 500nM	3	2	2293.24								Bortez/Cont=	>5	>5	>5	Cont/Cont=	nd	nd	>5	=Avg Bort/Cont (1h, 500nM)
HEK293T	bortezomib 1h, 500nM	4	4	2344.17								Bortez/Cont=	>5	>5	>5	Cont/Cont=	nd	nd	>5	=Avg Bort/Cont (1h, 500nM)
HEK293T	bortezomib 1h, 500nM	4	3	2352.22								Bortez/Cont=	>5	>5	>5	Cont/Cont=	nd	nd	>5	=Avg Bort/Cont (1h, 500nM)
HEK293T	bortezomib 1h, 500nM	3	3	2352.24								Bortez/Cont=	>5	>5	>5	Cont/Cont=	nd	nd	>5	=Avg Bort/Cont (1h, 500nM)
HEK293T	bortezomib 1h, 500nM	2	2	2439.2								Bortez/Cont=	>5	>5	>5	Cont/Cont=	nd	nd	>5	=Avg Bort/Cont (1h, 500nM)
HEK293T	bortezomib 1h, 500nM	3	3	2442.36								Bortez/Cont=	>5	>5	>5	Cont/Cont=	nd	nd	>5	=Avg Bort/Cont (1h, 500nM)
HEK293T	bortezomib 1h, 500nM	3	4	2442.38								Bortez/Cont=	>5	>5	>5	Cont/Cont=	nd	nd	>5	=Avg Bort/Cont (1h, 500nM)
HEK293T	bortezomib 1h, 500nM	4	4	2442.4								Bortez/Cont=	>5	>5	>5	Cont/Cont=	nd	nd	>5	=Avg Bort/Cont (1h, 500nM)
HEK293T	bortezomib 1h, 500nM	4	3	2442.42								Bortez/Cont=	>5	>5	>5	Cont/Cont=	nd	nd	>5	=Avg Bort/Cont (1h, 500nM)
HEK293T	bortezomib 1h, 500nM	4	2	2462.38								Bortez/Cont=	>5	>5	>5	Cont/Cont=	nd	nd	>5	=Avg Bort/Cont (1h, 500nM)
HEK293T	bortezomib 1h, 500nM	4	4	2598.5								Bortez/Cont=	>5	>5	>5	Cont/Cont=	nd	nd	>5	=Avg Bort/Cont (1h, 500nM)
HEK293T	bortezomib 1h, 500nM	3	3	2661.45								Bortez/Cont=	>5	>5	>5	Cont/Cont=	nd	nd	>5	=Avg Bort/Cont (1h, 500nM)
HEK293T	bortezomib 1h, 500nM	3	2	2671.38								Bortez/Cont=	>5	>5	>5	Cont/Cont=	nd	nd	>5	=Avg Bort/Cont (1h, 500nM)
HEK293T	bortezomib 1h, 500nM	4	2	2678.51								Bortez/Cont=	>5	>5	>5	Cont/Cont=	nd	nd	>5	=Avg Bort/Cont (1h, 500nM)
HEK293T	bortezomib 1h, 500nM	5	1	2783.53								Bortez/Cont=	>5	>5	>5	Cont/Cont=	nd	nd	>5	=Avg Bort/Cont (1h, 500nM)
HEK293T	bortezomib 1h, 500nM	3	3	2796.43								Bortez/Cont=	>5	>5	>5	Cont/Cont=	nd	nd	>5	=Avg Bort/Cont (1h, 500nM)
HEK293T	bortezomib 1h, 500nM	3	2	2876.39								Bortez/Cont=	>5	>5	>5	Cont/Cont=	nd	nd	>5	=Avg Bort/Cont (1h, 500nM)
HEK293T	bortezomib 1h, 500nM	5	4	2893.61								Bortez/Cont=	>5	>5	>5	Cont/Cont=	nd	nd	>5	=Avg Bort/Cont (1h, 500nM)
HEK293T	bortezomib 1h, 500nM	3	2	2926.57								Bortez/Cont=	>5	>5	>5	Cont/Cont=	nd	nd	>5	=Avg Bort/Cont (1h, 500nM)
HEK293T	bortezomib 1h, 500nM	3	3	3046.47								Bortez/Cont=	>5	>5	>5	Cont/Cont=	nd	nd	>5	=Avg Bort/Cont (1h, 500nM)
HEK293T	bortezomib 1h, 500nM	4	6	3169.77								Bortez/Cont=	>5	>5	>5	Cont/Cont=	nd	nd	>5	=Avg Bort/Cont (1h, 500nM)
HEK293T	bortezomib 1h, 500nM	3	1	3377.6								Bortez/Cont=	>5	>5	>5	Cont/Cont=	nd	nd	>5	=Avg Bort/Cont (1h, 500nM)
HEK293T	bortezomib 1h, 500nM	5	7	3557.05								Bortez/Cont=	>5	>5	>5	Cont/Cont=	nd	nd	>5	=Avg Bort/Cont (1h, 500nM)
SH-SY5Y	bortezomib 1h, 500nM	2	2	1685.96	1685.92	Prefoldin subunit 1	cytoplasm	*m	Ac-AAPVDLELKKAFTEL	q		Bortez/Cont=	0.2	0.1		Cont/Cont=	1.175	0.825	0.15	=Avg Bort/Cont (1h, 500nM)
SH-SY5Y	bortezomib 1h, 500nM	2	1	2824.29	2824.28	RNA binding motif protein 3	nucleus	*m	Ac-SSEEGKLFVGGLNFNTDEQALEDHF	s		Bortez/Cont=	0.225	0.3		Cont/Cont=	0.9	1.1	0.2625	=Avg Bort/Cont (1h, 500nM)
SH-SY5Y	bortezomib 1h, 500nM	2	2	1906.03	1905.98	Eukaryotic translation elongation factor 1 beta	cytoplasm	*m	GFGDLKSPAGLQVLNDYL	a		Bortez/Cont=	0.366197	0.225352		Cont/Cont=	1.40845	0.591549	0.295775	=Avg Bort/Cont (1h, 500nM)
SH-SY5Y	bortezomib 1h, 500nM	2	1	1308.72	1308.72	NADH dehydrogenase 1 alpha subcomplex, 8	mitochondria	*m	PGIVELPTLEEL	k		Bortez/Cont=	0.366197	0.253521		Cont/Cont=	1.26761	0.732394	0.309859	=Avg Bort/Cont (1h, 500nM)
SH-SY5Y	bortezomib 1h, 500nM	2	2	1400.79	1400.77	Eukaryotic translation elongation factor 1 beta	cytoplasm	*m	GFGDLKSPAGLQVL	n		Bortez/Cont=	0.419048	0.228571		Cont/Cont=	1.14286	0.857143	0.32381	=Avg Bort/Cont (1h, 500nM)
SH-SY5Y	bortezomib 1h, 500nM	2	1	1082.69	1082.67	Protein DJ-1 ( Parkinson disease protein 7)	nucleus	*m	Ac-ASKRALVILA	k		Bortez/Cont=	0.421053	0.315789		Cont/Cont=	1.11579	0.884211	0.368421	=Avg Bort/Cont (1h, 500nM)
SH-SY5Y	bortezomib 1h, 500nM	3	2	1906.01	1905.98	Eukaryotic translation elongation factor 1 beta	cytoplasm	*m	GFGDLKSPAGLQVLNDYL	a		Bortez/Cont=	0.461538	0.307692		Cont/Cont=	1.38462	0.615385	0.384615	=Avg Bort/Cont (1h, 500nM)
SH-SY5Y	bortezomib 1h, 500nM	2	1	1524.75	1524.75	RNA binding motif protein 3	nucleus	*m	Ac-SSEEGKLFVGGLNF	n		Bortez/Cont=	0.419048	0.380952		Cont/Cont=	1.14286	0.857143	0.4	=Avg Bort/Cont (1h, 500nM)
SH-SY5Y	bortezomib 1h, 500nM	4	2	2525.28	2525.35	Peptidylprolyl isomerase E	nucleus	*m	Ac-ATTKRVLYVGGLAEEVDDKVLHA	a		Bortez/Cont=	0.444444	0.37037		Cont/Cont=	1.30864	0.691358	0.407407	=Avg Bort/Cont (1h, 500nM)
SH-SY5Y	bortezomib 1h, 500nM	3	2	3198.52	3198.6	Phosphatidylethanolamine-binding protein 1	cytoplasm	*m	PVDLSKWSGPLSLQEVDEQPQHPLHVTY	a		Bortez/Cont=	0.45283	0.377358		Cont/Cont=	1.69811	0.301887	0.415094	=Avg Bort/Cont (1h, 500nM)
SH-SY5Y	bortezomib 1h, 500nM	2	1	1672.93	1672.9	D4, zinc and double PHD fingers family 2	cytoplasm	*m	Ac-AAVVENVVKLLGEQY	y		Bortez/Cont=	0.422535	0.478873		Cont/Cont=	1.23944	0.760563	0.450704	=Avg Bort/Cont (1h, 500nM)
SH-SY5Y	bortezomib 1h, 500nM	4	2	3198.56	3198.6	Phosphatidylethanolamine-binding protein 1	cytoplasm	*m	PVDLSKWSGPLSLQEVDEQPQHPLHVTY	a		Bortez/Cont=	0.576271	0.372881		Cont/Cont=	1.69492	0.305085	0.474576	=Avg Bort/Cont (1h, 500nM)
SH-SY5Y	bortezomib 1h, 500nM	2	1	2216.08	2216.08	Splicing factor, arginine/serine-rich 2	nucleus	*m	Ac-SYGRPPPDVEGMTSLKVDNL	t		Bortez/Cont=	0.519481	0.519481		Cont/Cont=	1.2987	0.701299	0.519481	=Avg Bort/Cont (1h, 500nM)
SH-SY5Y	bortezomib 1h, 500nM	2	1	2480.17	2480.19	Splicing factor, arginine/serine-rich 2	nucleus	*m	Ac-SYGRPPPDVEGMTSLKVDNLTY	r		Bortez/Cont=	0.424242	0.757576		Cont/Cont=	1.45455	0.545455	0.590909	=Avg Bort/Cont (1h, 500nM)
SH-SY5Y	bortezomib 1h, 500nM	3	1	2357.16	2357.18	40S ribosomal protein S12	cytoplasm	*m	Ac-AEEGIAAGGVMDVNTALQEVLKT	a		Bortez/Cont=	0.512821	0.692308		Cont/Cont=	1.15385	0.846154	0.602564	=Avg Bort/Cont (1h, 500nM)
SH-SY5Y	bortezomib 1h, 500nM	2	1	2357.17	2357.18	40S ribosomal protein S12	cytoplasm	*m	Ac-AEEGIAAGGVMDVNTALQEVLKT	a		Bortez/Cont=	0.625	0.65		Cont/Cont=	1.2	0.8	0.6375	=Avg Bort/Cont (1h, 500nM)
SH-SY5Y	bortezomib 1h, 500nM	2	1	2071.03	2071.06	Proteasome maturation protein	nucleus	*	Ac-MNARGLGSELKDSIPVTEL	s		Bortez/Cont=	0.66	0.64		Cont/Cont=	1.24	0.76	0.65	=Avg Bort/Cont (1h, 500nM)
SH-SY5Y	bortezomib 1h, 500nM	3	1	1805.99	1805.99	Heat shock 10kDa protein 1 (chaperonin 10)	mitochondria	*m	Ac-AGQAFRKFLPLFDRV	l		Bortez/Cont=	0.707071	0.767677		Cont/Cont=	1.17172	0.828283	0.737374	=Avg Bort/Cont (1h, 500nM)
SH-SY5Y	bortezomib 1h, 500nM	3	3	2784.41	2784.4	Stress-induced-phosphoprotein 1	nucleus	*	Ac-MEQVNELKEKGNKALSVGNIDDALQ	c		Bortez/Cont=	1.15068	0.383562		Cont/Cont=	1.17808	0.821918	0.767123	=Avg Bort/Cont (1h, 500nM)
SH-SY5Y	bortezomib 1h, 500nM	2	1	1555.83	1555.85	40S Ribosomal protein S28	cytoplasm	*	Ac-MDTSRVQPIKLAR	v		Bortez/Cont=	0.865979	0.701031		Cont/Cont=	1.1134	0.886598	0.783505	=Avg Bort/Cont (1h, 500nM)
SH-SY5Y	bortezomib 1h, 500nM	3	1	1555.81	1555.85	40S Ribosomal protein S28	cytoplasm	*	Ac-MDTSRVQPIKLAR	v		Bortez/Cont=	0.9	0.7		Cont/Cont=	1.1	0.9	0.8	=Avg Bort/Cont (1h, 500nM)
SH-SY5Y	bortezomib 1h, 500nM	3	1	2009.91	2009.98	Hematological and neurological expressed 1 protein	nucleus	*m	Ac-TTTTTFKGVDPNSRNSSR	d		Bortez/Cont=	0.9	0.7		Cont/Cont=	1.3	0.7	0.8	=Avg Bort/Cont (1h, 500nM)
SH-SY5Y	bortezomib 1h, 500nM	6	9	4960.61	4960.49	Thymosin beta-4	cytoplasm	*m	Ac-SDKPDMAEIEKFDKSKLKKTETQEKNPLPSKETIEQEKQAGES	*	Monoisotopic mass	Bortez/Cont=	0.830435	0.8		Cont/Cont=	0.934783	1.06522	0.815217	=Avg Bort/Cont (1h, 500nM)
SH-SY5Y	bortezomib 1h, 500nM	2	2	1662.96	1662.93	Prohibitin	mitochondria	*m	Ac-AAKVFESIGKFGLALA	v		Bortez/Cont=	0.879121	0.769231		Cont/Cont=	0.945055	1.05495	0.824176	=Avg Bort/Cont (1h, 500nM)
SH-SY5Y	bortezomib 1h, 500nM	9	9	4960.5	4960.49	Thymosin beta-4	cytoplasm	*m	Ac-SDKPDMAEIEKFDKSKLKKTETQEKNPLPSKETIEQEKQAGES	*	Monoisotopic mass	Bortez/Cont=	0.857143	0.859544		Cont/Cont=	0.895558	1.10444	0.858343	=Avg Bort/Cont (1h, 500nM)
SH-SY5Y	bortezomib 1h, 500nM	7	9	4960.57	4960.49	Thymosin beta-4	cytoplasm	*m	Ac-SDKPDMAEIEKFDKSKLKKTETQEKNPLPSKETIEQEKQAGES	*	Monoisotopic mass	Bortez/Cont=	0.932936	0.840537		Cont/Cont=	0.900149	1.09985	0.886736	=Avg Bort/Cont (1h, 500nM)
SH-SY5Y	bortezomib 1h, 500nM	8	9	4960.59	4960.49	Thymosin beta-4	cytoplasm	*m	Ac-SDKPDMAEIEKFDKSKLKKTETQEKNPLPSKETIEQEKQAGES	*	Monoisotopic mass	Bortez/Cont=	0.945978	0.854742		Cont/Cont=	0.907563	1.09244	0.90036	=Avg Bort/Cont (1h, 500nM)
SH-SY5Y	bortezomib 1h, 500nM	7	8	4933.6	4933.52	Thymosin beta-10	cytoplasm	*m	Ac-ADKPDMGEIASFDKAKLKKTETQEKNTLPTKETIEQEKRSEIS	*	Monoisotopic mass	Bortez/Cont=	0.967803	0.856061		Cont/Cont=	0.971591	1.02841	0.911932	=Avg Bort/Cont (1h, 500nM)
SH-SY5Y	bortezomib 1h, 500nM	8	8	4933.61	4933.52	Thymosin beta-10	cytoplasm	*m	Ac-ADKPDMGEIASFDKAKLKKTETQEKNTLPTKETIEQEKRSEIS	*	Monoisotopic mass	Bortez/Cont=	0.933929	0.896429		Cont/Cont=	0.967857	1.03214	0.915179	=Avg Bort/Cont (1h, 500nM)
SH-SY5Y	bortezomib 1h, 500nM	2	2	1478.83	1478.81	Prohibitin	mitochondria	*m	Ac-AAKVFESIGKFGLA	l		Bortez/Cont=	1.15044	0.707965		Cont/Cont=	0.973451	1.02655	0.929204	=Avg Bort/Cont (1h, 500nM)
SH-SY5Y	bortezomib 1h, 500nM	9	8	4933.62	4933.52	Thymosin beta-10	cytoplasm	*m	Ac-ADKPDMGEIASFDKAKLKKTETQEKNTLPTKETIEQEKRSEIS	*	Monoisotopic mass	Bortez/Cont=	0.970276	0.915074		Cont/Cont=	0.980892	1.01911	0.942675	=Avg Bort/Cont (1h, 500nM)
SH-SY5Y	bortezomib 1h, 500nM	4	2	2309.29	2309.34	40S Ribosomal protein S28	cytoplasm	*	Ac-MDTSRVQPIKLARVTKVLGR	t		Bortez/Cont=	1.10972	0.840125		Cont/Cont=	1.0815	0.918495	0.974922	=Avg Bort/Cont (1h, 500nM)
SH-SY5Y	bortezomib 1h, 500nM	2	1	1922.9	1922.92	40S Ribosomal protein S21	cytoplasm	*	Ac-MQNDAGEFVDLYVPRK	c		Bortez/Cont=	1.5	0.552632		Cont/Cont=	1.31579	0.684211	1.02632	=Avg Bort/Cont (1h, 500nM)
SH-SY5Y	bortezomib 1h, 500nM	3	2	2302.18	2302.2	Uncharacterized protein C14orf142	unknown	*	Ac-MELLGEYVGQEGKPQKLRVS	c		Bortez/Cont=	1.49254	0.597015		Cont/Cont=	0.955224	1.04478	1.04478	=Avg Bort/Cont (1h, 500nM)
SH-SY5Y	bortezomib 1h, 500nM	5	2	2309.29	2309.34	40S Ribosomal protein S28	cytoplasm	*	Ac-MDTSRVQPIKLARVTKVLGR	t		Bortez/Cont=	1.06912	1.02304		Cont/Cont=	1.02765	0.97235	1.04608	=Avg Bort/Cont (1h, 500nM)
SH-SY5Y	bortezomib 1h, 500nM	2	1	1328.67	1328.71	40S Ribosomal protein S28	cytoplasm	*	Ac-MDTSRVQPIKL	a		Bortez/Cont=	1.2973	0.972973		Cont/Cont=	1.18919	0.810811	1.13514	=Avg Bort/Cont (1h, 500nM)
SH-SY5Y	bortezomib 1h, 500nM	3	1	1706.91	1706.93	Heat shock 10kDa protein 1 (chaperonin 10)	mitochondria	*m	Ac-AGQAFRKFLPLFDR	v		Bortez/Cont=	1.48571	1.14286		Cont/Cont=	1.2	0.8	1.31429	=Avg Bort/Cont (1h, 500nM)
SH-SY5Y	bortezomib 1h, 500nM	3	1	2872.43	2872.48	Macrophage migration inhibitory factor	cytoplasm	*m	PMFIVNTNVPRASVPDGFLSELTQQL	a		Bortez/Cont=	1.75	1		Cont/Cont=	1.5	0.5	1.375	=Avg Bort/Cont (1h, 500nM)
SH-SY5Y	bortezomib 1h, 500nM	2	1	1212.63	1212.65	Histidine triad nucleotide-binding protein 1	cytoplasm	*m	Ac-ADEIAKAQVAR	p		Bortez/Cont=	1.81818	1.52727		Cont/Cont=	1.09091	0.909091	1.67273	=Avg Bort/Cont (1h, 500nM)
SH-SY5Y	bortezomib 1h, 500nM	2	2	1287.67	1287.68	Eukaryotic translation elongation factor 1 beta	cytoplasm	*m	GFGDLKSPAGLQV	l		Bortez/Cont=	2.21429	1.32143		Cont/Cont=	1.07143	0.928571	1.76786	=Avg Bort/Cont (1h, 500nM)
SH-SY5Y	bortezomib 1h, 500nM	2	2	1382.65	1382.64	Cytochrome c oxidase subunit 6b	mitochondria	*m	Ac-AEDMETKIKNY	k		Bortez/Cont=	1.94798	1.69942		Cont/Cont=	1.19075	0.809249	1.8237	=Avg Bort/Cont (1h, 500nM)
SH-SY5Y	bortezomib 1h, 500nM	2	1	1078.59	1078.59	Heat shock 10kDa protein 1 (chaperonin 10)	mitochondria	*m	Ac-AGQAFRKFL	p		Bortez/Cont=	2	1.75439		Cont/Cont=	1.05263	0.947368	1.87719	=Avg Bort/Cont (1h, 500nM)
SH-SY5Y	bortezomib 1h, 500nM	4	3	2595.44	2595.45	Histidine triad nucleotide-binding protein 1	cytoplasm	*m	ADEIAKAQVARPGGDTIFGKIIRK	e		Bortez/Cont=	2.27027	1.72973		Cont/Cont=	1.18919	0.810811	2	=Avg Bort/Cont (1h, 500nM)
SH-SY5Y	bortezomib 1h, 500nM	2	1	2137.14	2137.16	Enhancer of rudimentary homolog	nucleus	*m	Ac-SHTILLVQPTKRPEGRTY	a		Bortez/Cont=	2.17391	1.95652		Cont/Cont=	1.30435	0.695652	2.06522	=Avg Bort/Cont (1h, 500nM)
SH-SY5Y	bortezomib 1h, 500nM	5	3	2595.43	2595.45	Histidine triad nucleotide-binding protein 1	cytoplasm	*m	ADEIAKAQVARPGGDTIFGKIIRK	e		Bortez/Cont=	2.31111	1.91111		Cont/Cont=	1.11111	0.888889	2.11111	=Avg Bort/Cont (1h, 500nM)
SH-SY5Y	bortezomib 1h, 500nM	5	3	2837.56	2837.58	Histidine triad nucleotide-binding protein 1	cytoplasm	*m	Ac-ADEIAKAQVARPGGDTIFGKIIRKEI	p		Bortez/Cont=	2.53659	1.70732		Cont/Cont=	0.97561	1.02439	2.12195	=Avg Bort/Cont (1h, 500nM)
SH-SY5Y	bortezomib 1h, 500nM	4	1	2137.1	2137.16	Enhancer of rudimentary homolog	nucleus	*m	Ac-SHTILLVQPTKRPEGRTY	a		Bortez/Cont=	2.27273	2.45455		Cont/Cont=	1.36364	0.636364	2.36364	=Avg Bort/Cont (1h, 500nM)
SH-SY5Y	bortezomib 1h, 500nM	3	1	2137.13	2137.16	Enhancer of rudimentary homolog	nucleus	*m	Ac-SHTILLVQPTKRPEGRTY	a		Bortez/Cont=	2.36364	2.36364		Cont/Cont=	1.36364	0.636364	2.36364	=Avg Bort/Cont (1h, 500nM)
SH-SY5Y	bortezomib 1h, 500nM	3	1	1433.8	1433.84	Enhancer of rudimentary homolog	nucleus	*m	Ac-SHTILLVQPTKR	p		Bortez/Cont=	2.7907	2.32558		Cont/Cont=	1.16279	0.837209	2.55814	=Avg Bort/Cont (1h, 500nM)
SH-SY5Y	bortezomib 1h, 500nM	2	1	1433.81	1433.84	Enhancer of rudimentary homolog	nucleus	*m	Ac-SHTILLVQPTKR	p		Bortez/Cont=	3.25	2.5		Cont/Cont=	1.125	0.875	2.875	=Avg Bort/Cont (1h, 500nM)
SH-SY5Y	bortezomib 1h, 500nM	2	1	1550.81	1550.82	Heat shock 10kDa protein 1 (chaperonin 10)	mitochondria	*m	Ac-AGQAFRKFLPLFD	r		Bortez/Cont=	3.46154	2.53846		Cont/Cont=	1.15385	0.846154	3	=Avg Bort/Cont (1h, 500nM)
SH-SY5Y	bortezomib 1h, 500nM	3	1	2824.25	2824.28	RNA binding motif protein 3	nucleus	*m	Ac-SSEEGKLFVGGLNFNTDEQALEDHF	s		Bortez/Cont=	<0.2	<0.2		Cont/Cont=	1.09091	0.909091	<0.2	=Avg Bort/Cont (1h, 500nM)
SH-SY5Y	bortezomib 1h, 500nM	2	2	899.534	899.508	Protein SET (Phosphatase 2A inhibitor I2PP2A)	cytoplasm	*m	Ac-SAPAAKVSK	k		Bortez/Cont=	>5	>5		Cont/Cont=	nd	nd	>5	=Avg Bort/Cont (1h, 500nM)
SH-SY5Y	bortezomib 1h, 500nM	2	1	965.486	965.508	Heat shock 10kDa protein 1 (chaperonin 10)	mitochondria	*m	Ac-AGQAFRKF	l		Bortez/Cont=	8.5	8.33333		Cont/Cont=	1.5	0.5	>5	=Avg Bort/Cont (1h, 500nM)
SH-SY5Y	bortezomib 1h, 500nM	3	3	1027.66	1027.6	Protein SET (Phosphatase 2A inhibitor I2PP2A)	cytoplasm	*m	Ac-SAPAAKVSKK	e		Bortez/Cont=	8	13.25		Cont/Cont=	0.75	1.25	>5	=Avg Bort/Cont (1h, 500nM)
SH-SY5Y	bortezomib 1h, 500nM	3	1	2018.15	2018.15	Heat shock 10kDa protein 1 (chaperonin 10)	mitochondria	*m	Ac-AGQAFRKFLPLFDRVLV	e		Bortez/Cont=	>5	>5		Cont/Cont=	nd	nd	>5	=Avg Bort/Cont (1h, 500nM)
SH-SY5Y	bortezomib 1h, 500nM	2	1	2018.16	2018.15	Heat shock 10kDa protein 1 (chaperonin 10)	mitochondria	*m	Ac-AGQAFRKFLPLFDRVLV	e		Bortez/Cont=	>5	>5		Cont/Cont=	nd	nd	>5	=Avg Bort/Cont (1h, 500nM)
SH-SY5Y	bortezomib 1h, 500nM	2	1	2110.03	2110.12	Methylosome subunit pICln (AltName: Chloride channel, nucleotide sensitive 1A)	nucleus	*m	Ac-SFLKSFPPPGPAEGLLRQQ	p		Bortez/Cont=	>5	>5		Cont/Cont=	nd	nd	>5	=Avg Bort/Cont (1h, 500nM)
SH-SY5Y	bortezomib 1h, 500nM	2	1	1054.6	1054.6	Peroxiredoxin 5	mitochondria	c	SLAPNIISQL	*		Bortez/Cont=	0.361446	0.337349		Cont/Cont=	1.3253	0.674699	0.349398	=Avg Bort/Cont (1h, 500nM)
SH-SY5Y	bortezomib 1h, 500nM	3	3	1148.66	1148.62	40S Ribosomal protein S21	cytoplasm	l	AKADGIVSKNF	*		Bortez/Cont=	0.672566	0.336283		Cont/Cont=	1.09735	0.902655	0.504425	=Avg Bort/Cont (1h, 500nM)
SH-SY5Y	bortezomib 1h, 500nM	4	4	3284.79	3284.73	Triosephosphate isomerase 1	cytoplasm	c	KELASQPDVDGFLVGGASLKPEFVDIINAKQ	*		Bortez/Cont=	0.537634	0.494624		Cont/Cont=	1.1828	0.817204	0.516129	=Avg Bort/Cont (1h, 500nM)
SH-SY5Y	bortezomib 1h, 500nM	3	3	1462.79	1462.75	Eukaryotic translation initiation factor 5A	cytoplasm	a	MTEEAAVAIKAMAK	*		Bortez/Cont=	0.791667	0.3125		Cont/Cont=	1.04167	0.958333	0.552083	=Avg Bort/Cont (1h, 500nM)
SH-SY5Y	bortezomib 1h, 500nM	4	3	2521.31	2521.3	40S Ribosomal protein S21	cytoplasm	r	RMGESDDSILRLAKADGIVSKNF	*		Bortez/Cont=	0.863636	0.295455		Cont/Cont=	1.09091	0.909091	0.579545	=Avg Bort/Cont (1h, 500nM)
SH-SY5Y	bortezomib 1h, 500nM	3	2	2180.17	2180.17	Cytochrome c oxidase subunit 5a	mitochondria	l	RPTLNELGISTPEELGLDKV	*		Bortez/Cont=	0.833333	0.333333		Cont/Cont=	1.11111	0.888889	0.583333	=Avg Bort/Cont (1h, 500nM)
SH-SY5Y	bortezomib 1h, 500nM	3	3	1620.86	1620.82	Eukaryotic translation initiation factor 5A	cytoplasm	l	SAMTEEAAVAIKAMAK	*		Bortez/Cont=	0.851485	0.336634		Cont/Cont=	1.14851	0.851485	0.594059	=Avg Bort/Cont (1h, 500nM)
SH-SY5Y	bortezomib 1h, 500nM	5	3	2521.3	2521.3	40S Ribosomal protein S21	cytoplasm	r	RMGESDDSILRLAKADGIVSKNF	*		Bortez/Cont=	1.04	0.34		Cont/Cont=	1.16	0.84	0.69	=Avg Bort/Cont (1h, 500nM)
SH-SY5Y	bortezomib 1h, 500nM	2	2	1356.72	1356.71	Cytochrome c oxidase subunit 5a	mitochondria	l	GISTPEELGLDKV	*		Bortez/Cont=	0.873786	0.543689		Cont/Cont=	1.06796	0.932039	0.708738	=Avg Bort/Cont (1h, 500nM)
SH-SY5Y	bortezomib 1h, 500nM	2	2	1203.72	1203.67	FK506 Binding Protein	cytoplasm	l	VFDVELLKLE	*		Bortez/Cont=	1.04082	0.408163		Cont/Cont=	1.18367	0.816327	0.72449	=Avg Bort/Cont (1h, 500nM)
SH-SY5Y	bortezomib 1h, 500nM	4	3	2365.21	2365.19	40S Ribosomal protein S21	cytoplasm	r	MGESDDSILRLAKADGIVSKNF	*		Bortez/Cont=	1.13636	0.477273		Cont/Cont=	1.20455	0.795455	0.806818	=Avg Bort/Cont (1h, 500nM)
SH-SY5Y	bortezomib 1h, 500nM	2	2	1092.7	1092.68	Cytochrome c oxidase subunit 7c	mitochondria	l	VVRHQLLKT	*		Bortez/Cont=	1.2	0.6		Cont/Cont=	1.1	0.9	0.9	=Avg Bort/Cont (1h, 500nM)
SH-SY5Y	bortezomib 1h, 500nM	3	2	1092.69	1092.68	Cytochrome c oxidase subunit 7c	mitochondria	l	VVRHQLLKT	*		Bortez/Cont=	1.03896	0.779221		Cont/Cont=	1.09091	0.909091	0.909091	=Avg Bort/Cont (1h, 500nM)
SH-SY5Y	bortezomib 1h, 500nM	4	3	2914.51	2914.51	Triosephosphate isomerase 1	cytoplasm	l	ASQPDVDGFLVGGASLKPEFVDIINAKQ	*		Bortez/Cont=	1.28571	0.714286		Cont/Cont=	1.2	0.8	1	=Avg Bort/Cont (1h, 500nM)
SH-SY5Y	bortezomib 1h, 500nM	3	3	2914.51	2914.51	Triosephosphate isomerase 1	cytoplasm	l	ASQPDVDGFLVGGASLKPEFVDIINAKQ	*		Bortez/Cont=	1.44444	0.611111		Cont/Cont=	1.16667	0.833333	1.02778	=Avg Bort/Cont (1h, 500nM)
SH-SY5Y	bortezomib 1h, 500nM	2	2	949.517	949.487	40S Ribosomal protein S21	cytoplasm	k	ADGIVSKNF	*		Bortez/Cont=	1.45455	0.649351		Cont/Cont=	1.16883	0.831169	1.05195	=Avg Bort/Cont (1h, 500nM)
SH-SY5Y	bortezomib 1h, 500nM	4	3	2234.19	2234.15	40S Ribosomal protein S21	cytoplasm	m	GESDDSILRLAKADGIVSKNF	*		Bortez/Cont=	1.54098	0.819672		Cont/Cont=	1.08197	0.918033	1.18033	=Avg Bort/Cont (1h, 500nM)
SH-SY5Y	bortezomib 1h, 500nM	2	1	1610.72	1610.68	Macrophage migration inhibitory factor	cytoplasm	y	DMNAANVGWNNSTFA	*		Bortez/Cont=	2	1		Cont/Cont=	1.4	0.6	1.5	=Avg Bort/Cont (1h, 500nM)
SH-SY5Y	bortezomib 1h, 500nM	2	2	1272.6	1272.63	60S Ribosomal protein L31	cytoplasm	f	KNLQTVNVDEN	*		Bortez/Cont=	2.4	1.4		Cont/Cont=	1.2	0.8	1.9	=Avg Bort/Cont (1h, 500nM)
SH-SY5Y	bortezomib 1h, 500nM	4	3	2505.23	2505.24	Heat shock 10kDa protein 1 (chaperonin 10)	mitochondria	v	VLDDKDYFLFRDGDILGKYVD	*		Bortez/Cont=	3.69231	1.92308		Cont/Cont=	1.38462	0.615385	2.80769	=Avg Bort/Cont (1h, 500nM)
SH-SY5Y	bortezomib 1h, 500nM	3	2	1249.64	1249.63	Heat shock 10kDa protein 1 (chaperonin 10)	mitochondria	f	RDGDILGKYVD	*		Bortez/Cont=	3.8	2.13333		Cont/Cont=	1.26667	0.733333	2.96667	=Avg Bort/Cont (1h, 500nM)
SH-SY5Y	bortezomib 1h, 500nM	2	2	1249.65	1249.63	Heat shock 10kDa protein 1 (chaperonin 10)	mitochondria	f	RDGDILGKYVD	*		Bortez/Cont=	5.18182	1.81818		Cont/Cont=	1.09091	0.909091	3.5	=Avg Bort/Cont (1h, 500nM)
SH-SY5Y	bortezomib 1h, 500nM	3	2	2293.25	2293.25	Cytochrome c oxidase subunit 5a	mitochondria	e	LRPTLNELGISTPEELGLDKV	*		Bortez/Cont=	>5	>5		Cont/Cont=	nd	nd	>5	=Avg Bort/Cont (1h, 500nM)
SH-SY5Y	bortezomib 1h, 500nM	2	1	1272.71	1272.71	Small nuclear ribonucleoprotein G-like protein	nucleus	n	SIIMLEALERV	*		Bortez/Cont=	>5	>5		Cont/Cont=	nd	nd	>5	=Avg Bort/Cont (1h, 500nM)
SH-SY5Y	bortezomib 1h, 500nM	2	2	1093.55	1093.53	Heat shock 10kDa protein 1 (chaperonin 10)	mitochondria	r	DGDILGKYVD	*		Bortez/Cont=	>5	>5		Cont/Cont=	nd	nd	>5	=Avg Bort/Cont (1h, 500nM)
SH-SY5Y	bortezomib 1h, 500nM	2	1	1443.77	1443.78	Small nuclear ribonucleoprotein G-like protein	nucleus	r	GNSIIMLEALERV	*		Bortez/Cont=	>5	>5		Cont/Cont=	nd	nd	>5	=Avg Bort/Cont (1h, 500nM)
SH-SY5Y	bortezomib 1h, 500nM	2	2	1524.81	1524.86	Peroxiredoxin 5	mitochondria	m	APIKVGDAIPAVEVF	e		Bortez/Cont=	0.247423	0.123711		Cont/Cont=	1.27835	0.721649	0.185567	=Avg Bort/Cont (1h, 500nM)
SH-SY5Y	bortezomib 1h, 500nM	4	4	1712.97	1712.98	Triosephosphate isomerase 1	cytoplasm	t	KVIADNVKDWSKVVL	a		Bortez/Cont=	0.315789	0.210526		Cont/Cont=	1.32632	0.673684	0.263158	=Avg Bort/Cont (1h, 500nM)
SH-SY5Y	bortezomib 1h, 500nM	2	2	797.516	797.465	26S protease regulatory subunit 4	nucleus	y	LGDGPKLV	r		Bortez/Cont=	0.505747	0.229885		Cont/Cont=	1.1954	0.804598	0.367816	=Avg Bort/Cont (1h, 500nM)
SH-SY5Y	bortezomib 1h, 500nM	3	2	1899.93	1899.94	Peptidylprolyl isomerase A	cytoplasm	f	EDENFILKHTGPGILSM	a		Bortez/Cont=	0.522727	0.227273		Cont/Cont=	1.25	0.75	0.375	=Avg Bort/Cont (1h, 500nM)
SH-SY5Y	bortezomib 1h, 500nM	2	1	1634.84	1634.83	Peptidylprolyl isomerase A	cytoplasm	i	AVDGEPLGRVSFELF	a		Bortez/Cont=	0.408163	0.367347		Cont/Cont=	1.22449	0.77551	0.387755	=Avg Bort/Cont (1h, 500nM)
SH-SY5Y	bortezomib 1h, 500nM	2	2	1039.59	1039.55	Peptidylprolyl isomerase A	cytoplasm	l	KHTGPGILSM	a		Bortez/Cont=	0.714286	0.306122		Cont/Cont=	1.22449	0.77551	0.510204	=Avg Bort/Cont (1h, 500nM)
SH-SY5Y	bortezomib 1h, 500nM	2	1	1473.74	1473.75	Peptidylprolyl isomerase A	cytoplasm	f	DIAVDGEPLGRVSF	e		Bortez/Cont=	0.568182	0.454545		Cont/Cont=	1.31818	0.681818	0.511364	=Avg Bort/Cont (1h, 500nM)
SH-SY5Y	bortezomib 1h, 500nM	4	2	2229.15	2229.15	FK506 Binding Protein	cytoplasm	m	GVQVETISPGDGRTFPKRGQT	c		Bortez/Cont=	0.888889	0.333333		Cont/Cont=	0.888889	1.11111	0.611111	=Avg Bort/Cont (1h, 500nM)
SH-SY5Y	bortezomib 1h, 500nM	2	1	957.522	957.524	Eukaryotic translation elongation factor 1 beta	cytoplasm	c	VRSIQADGL	v		Bortez/Cont=	0.875	0.375		Cont/Cont=	1.375	0.625	0.625	=Avg Bort/Cont (1h, 500nM)
SH-SY5Y	bortezomib 1h, 500nM	2	2	1556.85	1556.83	Proteasome maturation protein	nucleus	r	GLGSELKDSIPVTEL	s		Bortez/Cont=	0.822222	0.444444		Cont/Cont=	1.22222	0.777778	0.633333	=Avg Bort/Cont (1h, 500nM)
SH-SY5Y	bortezomib 1h, 500nM	2	1	1245.62	1245.64	Peptidylprolyl isomerase A	cytoplasm	i	AVDGEPLGRVSF	e		Bortez/Cont=	0.708861	0.604782		Cont/Cont=	1.173	0.827004	0.656821	=Avg Bort/Cont (1h, 500nM)
SH-SY5Y	bortezomib 1h, 500nM	2	1	1898.89	1898.89	Histidine triad nucleotide-binding protein 1	cytoplasm	i	SVAEDDDESLLGHLMIVG	k		Bortez/Cont=	0.91954	0.45977		Cont/Cont=	1.31034	0.689655	0.689655	=Avg Bort/Cont (1h, 500nM)
SH-SY5Y	bortezomib 1h, 500nM	2	1	1332.72	1332.73	NHP2 non-histone chromosome protein 2-like 1	nucleus	a	ADAEPLEIILHL	p		Bortez/Cont=	0.897436	0.487179		Cont/Cont=	1.10256	0.897436	0.692308	=Avg Bort/Cont (1h, 500nM)
SH-SY5Y	bortezomib 1h, 500nM	3	3	1763.87	1763.92	Peptidylprolyl isomerase A	cytoplasm	f	ELFADKVPKTAENFR	a		Bortez/Cont=	0.890017	0.614213		Cont/Cont=	1.16751	0.832487	0.752115	=Avg Bort/Cont (1h, 500nM)
SH-SY5Y	bortezomib 1h, 500nM	2	2	825.536	825.496	Triosephosphate isomerase 1	cytoplasm	k	LDPKIAVA	a		Bortez/Cont=	1.15	0.55		Cont/Cont=	1.1	0.9	0.85	=Avg Bort/Cont (1h, 500nM)
SH-SY5Y	bortezomib 1h, 500nM	2	2	1089.59	1089.57	Phosphatidylethanolamine-binding protein 1	cytoplasm	m	KGNDISSGTVL	s		Bortez/Cont=	0.888889	po		Cont/Cont=	1.22222	0.777778	0.888889	=Avg Bort/Cont (1h, 500nM)
SH-SY5Y	bortezomib 1h, 500nM	3	3	1558.91	1558.85	Peptidylprolyl isomerase A	cytoplasm	f	ADKVPKTAENFRAL	s		Bortez/Cont=	1.36986	0.438356		Cont/Cont=	1.28767	0.712329	0.90411	=Avg Bort/Cont (1h, 500nM)
SH-SY5Y	bortezomib 1h, 500nM	4	1	2718.32	2718.36	Protein SET (Phosphatase 2A inhibitor I2PP2A)	cytoplasm	f	VNHPQVSALLGEEDEEALHYLTRV	e		Bortez/Cont=	1.33333	0.666667		Cont/Cont=	1.66667	0.333333	1	=Avg Bort/Cont (1h, 500nM)
SH-SY5Y	bortezomib 1h, 500nM	2	1	1329.61	1329.6	Cathepsin C	lysosome	r	DPFNPFELTNH	a		Bortez/Cont=	1.22222	0.888889		Cont/Cont=	1.22222	0.777778	1.05556	=Avg Bort/Cont (1h, 500nM)
SH-SY5Y	bortezomib 1h, 500nM	4	3	1558.88	1558.85	Peptidylprolyl isomerase A	cytoplasm	f	ADKVPKTAENFRAL	s		Bortez/Cont=	1.44444	0.722222		Cont/Cont=	1.25	0.75	1.08333	=Avg Bort/Cont (1h, 500nM)
SH-SY5Y	bortezomib 1h, 500nM	3	3	1584.87	1584.85	Heat shock 10kDa protein 1 (chaperonin 10)	mitochondria	a	VGSGSKGKGGEIQPVSV	k		Bortez/Cont=	1.65714	0.857143		Cont/Cont=	1.28571	0.714286	1.25714	=Avg Bort/Cont (1h, 500nM)
SH-SY5Y	bortezomib 1h, 500nM	2	1	1556.71	1556.7	Histidine triad nucleotide-binding protein 1	cytoplasm	v	AEDDDESLLGHLMI	v		Bortez/Cont=	1.46667	1.2		Cont/Cont=	1.33333	0.666667	1.33333	=Avg Bort/Cont (1h, 500nM)
SH-SY5Y	bortezomib 1h, 500nM	2	1	871.486	871.476	Splicing factor, arginine/serine-rich 1	cytoplasm	y	GAIRDIDL	k		Bortez/Cont=	1.72944	1.31034		Cont/Cont=	0.970822	1.02918	1.51989	=Avg Bort/Cont (1h, 500nM)
SH-SY5Y	bortezomib 1h, 500nM	3	2	2333.18	2333.22	Macrophage migration inhibitory factor	cytoplasm	l	AQATGKPPQYIAVHVVPDQLMA	f		Bortez/Cont=	3.33333	1.39394		Cont/Cont=	1.33333	0.666667	2.36364	=Avg Bort/Cont (1h, 500nM)
SH-SY5Y	bortezomib 1h, 500nM	3	3	1955.08	1955.07	Heat shock 10kDa protein 1 (chaperonin 10)	mitochondria	a	TVVAVGSGSKGKGGEIQPVSV	k		Bortez/Cont=	3.66667	1.46667		Cont/Cont=	1.2	0.8	2.56667	=Avg Bort/Cont (1h, 500nM)
SH-SY5Y	bortezomib 1h, 500nM	3	3	1655.91	1655.88	Heat shock 10kDa protein 1 (chaperonin 10)	mitochondria	v	AVGSGSKGKGGEIQPVSV	k		Bortez/Cont=	3.41463	1.85366		Cont/Cont=	1.07317	0.926829	2.63415	=Avg Bort/Cont (1h, 500nM)
SH-SY5Y	bortezomib 1h, 500nM	3	2	1785.93	1785.91	60S acidic ribosomal protein P2	cytoplasm	v	GIEADDDRLNKVISEL	n		Bortez/Cont=	po	2.74074		Cont/Cont=	1.18519	0.814815	2.74074	=Avg Bort/Cont (1h, 500nM)
SH-SY5Y	bortezomib 1h, 500nM	2	1	926.538	926.555	Vimentin	cytoplasm	r	SSVPGVRLL	q		Bortez/Cont=	3.45833	2.14352		Cont/Cont=	1.25926	0.740741	2.80093	=Avg Bort/Cont (1h, 500nM)
SH-SY5Y	bortezomib 1h, 500nM	3	2	1269.74	1269.71	Splicing factor, arginine/serine-rich 1	cytoplasm	y	GAIRDIDLKNR	r		Bortez/Cont=	3.31707	2.34146		Cont/Cont=	1.02439	0.97561	2.82927	=Avg Bort/Cont (1h, 500nM)
SH-SY5Y	bortezomib 1h, 500nM	3	2	2131.14	2131.14	Macrophage migration inhibitory factor	cytoplasm	l	AQATGKPPQYIAVHVVPDQL	m		Bortez/Cont=	4	1.93103		Cont/Cont=	1.31034	0.689655	2.96552	=Avg Bort/Cont (1h, 500nM)
SH-SY5Y	bortezomib 1h, 500nM	2	1	1762.81	1762.84	Complement component 1 Q subcomponent-binding protein, mitochondrial	mitochondria	l	ADRGVDNTFADELVEL	s		Bortez/Cont=	4.07143	1.92857		Cont/Cont=	1.28571	0.714286	3	=Avg Bort/Cont (1h, 500nM)
SH-SY5Y	bortezomib 1h, 500nM	3	2	1444.79	1444.76	Histidine triad nucleotide-binding protein 1	cytoplasm	k	EIPAKIIFEDDR	c		Bortez/Cont=	4.44444	1.62963		Cont/Cont=	1.18519	0.814815	3.03704	=Avg Bort/Cont (1h, 500nM)
SH-SY5Y	bortezomib 1h, 500nM	3	2	1406.75	1406.73	Histidine triad nucleotide-binding protein 1	cytoplasm	c	AADLGLNKGYRMV	v		Bortez/Cont=	4.61538	3.23077		Cont/Cont=	1.23077	0.769231	3.92308	=Avg Bort/Cont (1h, 500nM)
SH-SY5Y	bortezomib 1h, 500nM	3	4	1713.07	1712.98	Triosephosphate isomerase 1	cytoplasm	t	KVIADNVKDWSKVVL	a		Bortez/Cont=	<0.2	<0.2		Cont/Cont=	1.44928	0.550725	<0.2	=Avg Bort/Cont (1h, 500nM)
SH-SY5Y	bortezomib 1h, 500nM	2	1	1254.74	1254.73	Far upstream element-binding protein 2	nucleus	a	ARIINDLLQSL	r		Bortez/Cont=	<0.2	<0.2		Cont/Cont=	0.989899	1.0101	<0.2	=Avg Bort/Cont (1h, 500nM)
SH-SY5Y	bortezomib 1h, 500nM	3	2	2469.34	2469.33	Far upstream element-binding protein 2	nucleus	c	GLVIGRGGENVKAINQQTGAFVEI	s		Bortez/Cont=	<0.2	<0.2		Cont/Cont=	1.17808	0.821918	<0.2	=Avg Bort/Cont (1h, 500nM)
SH-SY5Y	bortezomib 1h, 500nM	5	3	3175.67	3175.67	Peptidylprolyl isomerase A	cytoplasm	i	AVDGEPLGRVSFELFADKVPKTAENFRAL	s		Bortez/Cont=	<0.2	<0.2		Cont/Cont=	1.07692	0.923077	<0.2	=Avg Bort/Cont (1h, 500nM)
SH-SY5Y	bortezomib 1h, 500nM	3	2	1667.93	1667.92	60S acidic ribosomal protein P2	cytoplasm	l	NGKNIEDVIAQGIGKL	a		Bortez/Cont=	>5	>5		Cont/Cont=	nd	nd	>5	=Avg Bort/Cont (1h, 500nM)
SH-SY5Y	bortezomib 1h, 500nM	2	1	1238.65	1238.63	Histone H2B	nucleus	n	SFVNDIFERI	a		Bortez/Cont=	>5	>5		Cont/Cont=	nd	nd	>5	=Avg Bort/Cont (1h, 500nM)
SH-SY5Y	bortezomib 1h, 500nM	2	2	1099.6	1099.57	Heterogeneous nuclear ribonucleoprotein D-like	nucleus	r	GFGFVLFKDA	a		Bortez/Cont=	>5	>5		Cont/Cont=	nd	nd	>5	=Avg Bort/Cont (1h, 500nM)
SH-SY5Y	bortezomib 1h, 500nM	1	1	773.39	773.375	Heterogeneous nuclear ribonucleoproteins A2/B1 (the motif GFGFVTF is also found in several other proteins!!!)	nucleus	r	GFGFVTF	d		Bortez/Cont=	7.85714	5		Cont/Cont=	0.857143	1.14286	>5	=Avg Bort/Cont (1h, 500nM)
SH-SY5Y	bortezomib 1h, 500nM	2	2	1342.74	1342.72	Macrophage migration inhibitory factor	cytoplasm	l	AQATGKPPQYIAV	h		Bortez/Cont=	>5	>5		Cont/Cont=	nd	nd	>5	=Avg Bort/Cont (1h, 500nM)
SH-SY5Y	bortezomib 1h, 500nM	2	2	782.471	782.433	Nucleophosmin	nucleus	a	KFINYV	k		Bortez/Cont=	>5	>5		Cont/Cont=	nd	nd	>5	=Avg Bort/Cont (1h, 500nM)
SH-SY5Y	bortezomib 1h, 500nM	2	2	972.576	972.549	Heterogeneous nuclear ribonucleoprotein D-like	nucleus	a	ASVDKVLEL	k		Bortez/Cont=	>5	>5		Cont/Cont=	nd	nd	>5	=Avg Bort/Cont (1h, 500nM)
SH-SY5Y	bortezomib 1h, 500nM	3	3	1485.78	1485.78	Heat shock 10kDa protein 1 (chaperonin 10)	mitochondria	v	GSGSKGKGGEIQPVSV	k		Bortez/Cont=	10.7692	6.92308		Cont/Cont=	1.23077	0.769231	>5	=Avg Bort/Cont (1h, 500nM)
SH-SY5Y	bortezomib 1h, 500nM	2	3	1485.81	1485.78	Heat shock 10kDa protein 1 (chaperonin 10)	mitochondria	v	GSGSKGKGGEIQPVSV	k		Bortez/Cont=	>5	>5		Cont/Cont=	nd	nd	>5	=Avg Bort/Cont (1h, 500nM)
SH-SY5Y	bortezomib 1h, 500nM	4	4	1584.93	1584.88	60S acidic ribosomal protein P2	cytoplasm	a	ALGGNSSPSAKDIKKI	l		Bortez/Cont=	>5	>5		Cont/Cont=	nd	nd	>5	=Avg Bort/Cont (1h, 500nM)
SH-SY5Y	bortezomib 1h, 500nM	2	1	1283.7	1283.72	Nucleophosmin	nucleus	l	GGFEITPPVVLR	l		Bortez/Cont=	>5	>5		Cont/Cont=	nd	nd	>5	=Avg Bort/Cont (1h, 500nM)
SH-SY5Y	bortezomib 1h, 500nM	2	2	1996.93	1996.9	Acyl carrier protein, mitochondrial	mitochondria	a	MEDEFGFEIPDIDAEKL	m		Bortez/Cont=	>5	>5		Cont/Cont=	nd	nd	>5	=Avg Bort/Cont (1h, 500nM)
SH-SY5Y	bortezomib 1h, 500nM	2	2	2067.92	2067.93	Acyl carrier protein, mitochondrial	mitochondria	m	AMEDEFGFEIPDIDAEKL	m		Bortez/Cont=	>5	>5		Cont/Cont=	nd	nd	>5	=Avg Bort/Cont (1h, 500nM)
SH-SY5Y	bortezomib 1h, 500nM	2	1	1342.7	1342.67	Protein SET (Phosphatase 2A inhibitor I2PP2A)	cytoplasm	h	IDEVQNEIDRL	n		Bortez/Cont=	>5	>5		Cont/Cont=	nd	nd	>5	=Avg Bort/Cont (1h, 500nM)
SH-SY5Y	bortezomib 1h, 500nM	3	2	2200.13	2200.12	60S acidic ribosomal protein P2	cytoplasm	i	LDSVGIEADDDRLNKVISEL	n		Bortez/Cont=	>5	>5		Cont/Cont=	nd	nd	>5	=Avg Bort/Cont (1h, 500nM)
SH-SY5Y	bortezomib 1h, 500nM	2	2	743.502	743.454	60S acidic ribosomal protein P2	cytoplasm	q	GIGKLASV	p		Bortez/Cont=	>5	>5		Cont/Cont=	nd	nd	>5	=Avg Bort/Cont (1h, 500nM)
SH-SY5Y	bortezomib 1h, 500nM	2	2	772.5	772.469	Protein SET (Phosphatase 2A inhibitor I2PP2A)	cytoplasm	r	SELIAKI	p		Bortez/Cont=	>5	>5		Cont/Cont=	nd	nd	>5	=Avg Bort/Cont (1h, 500nM)
SH-SY5Y	bortezomib 1h, 500nM	2	1	1630.76	1630.77	Protein SET (Phosphatase 2A inhibitor I2PP2A)	cytoplasm	a	LLGEEDEEALHYLT	r		Bortez/Cont=	>5	>5		Cont/Cont=	nd	nd	>5	=Avg Bort/Cont (1h, 500nM)
SH-SY5Y	bortezomib 1h, 500nM	4	1	1855.97	1856.01	40S Ribosomal protein S28	cytoplasm	e	GDVLTLLESEREARRL	r		Bortez/Cont=	>5	>5		Cont/Cont=	nd	nd	>5	=Avg Bort/Cont (1h, 500nM)
SH-SY5Y	bortezomib 1h, 500nM	2	1	1199.71	1199.69	Heat shock 10kDa protein 1 (chaperonin 10)	mitochondria	f	LPLFDRVLVE	r		Bortez/Cont=	>5	>5		Cont/Cont=	nd	nd	>5	=Avg Bort/Cont (1h, 500nM)
SH-SY5Y	bortezomib 1h, 500nM	2	1	1346.77	1346.76	Heat shock 10kDa protein 1 (chaperonin 10)	mitochondria	k	FLPLFDRVLVE	r		Bortez/Cont=	>5	>5		Cont/Cont=	nd	nd	>5	=Avg Bort/Cont (1h, 500nM)
SH-SY5Y	bortezomib 1h, 500nM	2	1	1086.61	1086.61	Heat shock 10kDa protein 1 (chaperonin 10)	mitochondria	l	PLFDRVLVE	r		Bortez/Cont=	>5	>5		Cont/Cont=	nd	nd	>5	=Avg Bort/Cont (1h, 500nM)
SH-SY5Y	bortezomib 1h, 500nM	2	2	1174.6	1174.55	Heat shock 10kDa protein 1 (chaperonin 10)	mitochondria	v	LDDKDYFLF	r		Bortez/Cont=	>5	>5		Cont/Cont=	nd	nd	>5	=Avg Bort/Cont (1h, 500nM)
SH-SY5Y	bortezomib 1h, 500nM	2	2	1273.65	1273.62	Heat shock 10kDa protein 1 (chaperonin 10)	mitochondria	v	VLDDKDYFLF	r		Bortez/Cont=	>5	>5		Cont/Cont=	nd	nd	>5	=Avg Bort/Cont (1h, 500nM)
SH-SY5Y	bortezomib 1h, 500nM	2	1	1529.72	1529.72	Protein SET (Phosphatase 2A inhibitor I2PP2A)	cytoplasm	a	LLGEEDEEALHYL	t		Bortez/Cont=	>5	>5		Cont/Cont=	nd	nd	>5	=Avg Bort/Cont (1h, 500nM)
SH-SY5Y	bortezomib 1h, 500nM	3	3	1654.93	1654.91	Heat shock 10kDa protein 1 (chaperonin 10)	mitochondria	k	GGIMLPEKSQGKVLQA	t		Bortez/Cont=	>5	>5		Cont/Cont=	nd	nd	>5	=Avg Bort/Cont (1h, 500nM)
SH-SY5Y	bortezomib 1h, 500nM	3	1	1786.84	1786.87	Protein SET (Phosphatase 2A inhibitor I2PP2A)	cytoplasm	a	LLGEEDEEALHYLTR	v		Bortez/Cont=	>5	>5		Cont/Cont=	nd	nd	>5	=Avg Bort/Cont (1h, 500nM)
SH-SY5Y	bortezomib 1h, 500nM	4	1	2619.23	2619.29	Protein SET (Phosphatase 2A inhibitor I2PP2A)	cytoplasm	f	VNHPQVSALLGEEDEEALHYLTR	v		Bortez/Cont=	>5	>5		Cont/Cont=	nd	nd	>5	=Avg Bort/Cont (1h, 500nM)
SH-SY5Y	bortezomib 1h, 500nM	3	1	2269.11	2269.12	Protein SET (Phosphatase 2A inhibitor I2PP2A)	cytoplasm	h	PQVSALLGEEDEEALHYLTR	v		Bortez/Cont=	>5	>5		Cont/Cont=	nd	nd	>5	=Avg Bort/Cont (1h, 500nM)
SH-SY5Y	bortezomib 1h, 500nM	3	2	1479.78	1479.78	Macrophage migration inhibitory factor	cytoplasm	l	AQATGKPPQYIAVH	v		Bortez/Cont=	>5	>5		Cont/Cont=	nd	nd	>5	=Avg Bort/Cont (1h, 500nM)
SH-SY5Y	bortezomib 1h, 500nM	3	1	1857.9	1857.91	Protein SET (Phosphatase 2A inhibitor I2PP2A)	cytoplasm	s	ALLGEEDEEALHYLTR	v		Bortez/Cont=	>5	>5		Cont/Cont=	nd	nd	>5	=Avg Bort/Cont (1h, 500nM)
SH-SY5Y	bortezomib 1h, 500nM	1	1	787.407								Bortez/Cont=	4.28571	2.57143		Cont/Cont=	1.2381	0.761905	3.42857	=Avg Bort/Cont (1h, 500nM)
SH-SY5Y	bortezomib 1h, 500nM	2	1	818.447								Bortez/Cont=	2.7907	1.86047		Cont/Cont=	1.16279	0.837209	2.32558	=Avg Bort/Cont (1h, 500nM)
SH-SY5Y	bortezomib 1h, 500nM	2	2	939.563								Bortez/Cont=	<0.2	<0.2		Cont/Cont=	1.07216	0.927835	<0.2	=Avg Bort/Cont (1h, 500nM)
SH-SY5Y	bortezomib 1h, 500nM	2	1	996.538								Bortez/Cont=	1.85714	1.5		Cont/Cont=	0.928571	1.07143	1.67857	=Avg Bort/Cont (1h, 500nM)
SH-SY5Y	bortezomib 1h, 500nM	2	1	1062.52								Bortez/Cont=	1.06667	0.933333		Cont/Cont=	1.46667	0.533333	1	=Avg Bort/Cont (1h, 500nM)
SH-SY5Y	bortezomib 1h, 500nM	2	1	1067.64								Bortez/Cont=	3.85185	1.77778		Cont/Cont=	1.18519	0.814815	2.81481	=Avg Bort/Cont (1h, 500nM)
SH-SY5Y	bortezomib 1h, 500nM	2	1	1085.56								Bortez/Cont=	>5	>5		Cont/Cont=	nd	nd	>5	=Avg Bort/Cont (1h, 500nM)
SH-SY5Y	bortezomib 1h, 500nM	2	1	1138.62								Bortez/Cont=	0.380952	0.571429		Cont/Cont=	1.04762	0.952381	0.47619	=Avg Bort/Cont (1h, 500nM)
SH-SY5Y	bortezomib 1h, 500nM	2	1	1157.57								Bortez/Cont=	1.81818	1.38182		Cont/Cont=	1.27273	0.727273	1.6	=Avg Bort/Cont (1h, 500nM)
SH-SY5Y	bortezomib 1h, 500nM	3	1	1160.7								Bortez/Cont=	0.909091	0.659091		Cont/Cont=	1.25	0.75	0.784091	=Avg Bort/Cont (1h, 500nM)
SH-SY5Y	bortezomib 1h, 500nM	2	1	1215.6								Bortez/Cont=	1.1	0.8		Cont/Cont=	1.2	0.8	0.95	=Avg Bort/Cont (1h, 500nM)
SH-SY5Y	bortezomib 1h, 500nM	3	2	1216.65								Bortez/Cont=	0.708861	0.329114		Cont/Cont=	1.18987	0.810127	0.518987	=Avg Bort/Cont (1h, 500nM)
SH-SY5Y	bortezomib 1h, 500nM	2	1	1227.56								Bortez/Cont=	>5	>5		Cont/Cont=	nd	nd	>5	=Avg Bort/Cont (1h, 500nM)
SH-SY5Y	bortezomib 1h, 500nM	2	1	1249.61								Bortez/Cont=	2.96	4		Cont/Cont=	1.12	0.88	3.48	=Avg Bort/Cont (1h, 500nM)
SH-SY5Y	bortezomib 1h, 500nM	2	2	1260.52								Bortez/Cont=	<0.2	<0.2		Cont/Cont=	1.05656	0.943445	<0.2	=Avg Bort/Cont (1h, 500nM)
SH-SY5Y	bortezomib 1h, 500nM	3	3	1269.73								Bortez/Cont=	>5	>5		Cont/Cont=	nd	nd	>5	=Avg Bort/Cont (1h, 500nM)
SH-SY5Y	bortezomib 1h, 500nM	2	1	1273.64								Bortez/Cont=	>5	>5		Cont/Cont=	nd	nd	>5	=Avg Bort/Cont (1h, 500nM)
SH-SY5Y	bortezomib 1h, 500nM	3	1	1317.65								Bortez/Cont=	5	2.2		Cont/Cont=	1.2	0.8	3.6	=Avg Bort/Cont (1h, 500nM)
SH-SY5Y	bortezomib 1h, 500nM	3	1	1337.73								Bortez/Cont=	2.82927	2.19512		Cont/Cont=	1.21951	0.780488	2.5122	=Avg Bort/Cont (1h, 500nM)
SH-SY5Y	bortezomib 1h, 500nM	3	2	1337.74								Bortez/Cont=	>5	>5		Cont/Cont=	nd	nd	>5	=Avg Bort/Cont (1h, 500nM)
SH-SY5Y	bortezomib 1h, 500nM	2	2	1368.76								Bortez/Cont=	2.63636	1		Cont/Cont=	1.45455	0.545455	1.81818	=Avg Bort/Cont (1h, 500nM)
SH-SY5Y	bortezomib 1h, 500nM	2	1	1382.75								Bortez/Cont=	0.846154	0.589744		Cont/Cont=	1.15385	0.846154	0.717949	=Avg Bort/Cont (1h, 500nM)
SH-SY5Y	bortezomib 1h, 500nM	2	1	1384.78								Bortez/Cont=	>5	>5		Cont/Cont=	nd	nd	>5	=Avg Bort/Cont (1h, 500nM)
SH-SY5Y	bortezomib 1h, 500nM	2	1	1393.61								Bortez/Cont=	>5	>5		Cont/Cont=	nd	nd	>5	=Avg Bort/Cont (1h, 500nM)
SH-SY5Y	bortezomib 1h, 500nM	2	2	1407.83								Bortez/Cont=	1.32353	po		Cont/Cont=	1.02941	0.970588	1.32	=Avg Bort/Cont (1h, 500nM)
SH-SY5Y	bortezomib 1h, 500nM	2	1	1420.73								Bortez/Cont=	1.17647	1.05882		Cont/Cont=	1.05882	0.941176	1.11765	=Avg Bort/Cont (1h, 500nM)
SH-SY5Y	bortezomib 1h, 500nM	3	3	1426.78								Bortez/Cont=	0.350877	0.280702		Cont/Cont=	1.12281	0.877193	0.315789	=Avg Bort/Cont (1h, 500nM)
SH-SY5Y	bortezomib 1h, 500nM	3	3	1455.82								Bortez/Cont=	>5	>5		Cont/Cont=	nd	nd	>5	=Avg Bort/Cont (1h, 500nM)
SH-SY5Y	bortezomib 1h, 500nM	3	1	1459.65								Bortez/Cont=	2.75	2.25		Cont/Cont=	1.25	0.75	2.5	=Avg Bort/Cont (1h, 500nM)
SH-SY5Y	bortezomib 1h, 500nM	2	1	1495.68								Bortez/Cont=	>5	>5		Cont/Cont=	nd	nd	>5	=Avg Bort/Cont (1h, 500nM)
SH-SY5Y	bortezomib 1h, 500nM	3	2	1501.87								Bortez/Cont=	<0.2	<0.2		Cont/Cont=	1.125	0.875	<0.2	=Avg Bort/Cont (1h, 500nM)
SH-SY5Y	bortezomib 1h, 500nM	2	1	1502.77								Bortez/Cont=	1.92157	0.980392		Cont/Cont=	1.29412	0.705882	1.45098	=Avg Bort/Cont (1h, 500nM)
SH-SY5Y	bortezomib 1h, 500nM	3	2	1521.8								Bortez/Cont=	2.63158	1.84211		Cont/Cont=	1.15789	0.842105	2.23684	=Avg Bort/Cont (1h, 500nM)
SH-SY5Y	bortezomib 1h, 500nM	3	2	1543.82								Bortez/Cont=	0.793388	0.661157		Cont/Cont=	1.04132	0.958678	0.727273	=Avg Bort/Cont (1h, 500nM)
SH-SY5Y	bortezomib 1h, 500nM	3	2	1546.84								Bortez/Cont=	>5	>5		Cont/Cont=	nd	nd	>5	=Avg Bort/Cont (1h, 500nM)
SH-SY5Y	bortezomib 1h, 500nM	2	1	1551.79								Bortez/Cont=	0.7	0.7		Cont/Cont=	1.1	0.9	0.7	=Avg Bort/Cont (1h, 500nM)
SH-SY5Y	bortezomib 1h, 500nM	2	1	1565.74								Bortez/Cont=	0.844444	0.777778		Cont/Cont=	1.22222	0.777778	0.811111	=Avg Bort/Cont (1h, 500nM)
SH-SY5Y	bortezomib 1h, 500nM	2	2	1570.84								Bortez/Cont=	4.66667	3.33333		Cont/Cont=	1.06667	0.933333	4	=Avg Bort/Cont (1h, 500nM)
SH-SY5Y	bortezomib 1h, 500nM	2	2	1579.77								Bortez/Cont=	<0.2	<0.2		Cont/Cont=	1.14286	0.857143	<0.2	=Avg Bort/Cont (1h, 500nM)
SH-SY5Y	bortezomib 1h, 500nM	3	2	1584.84								Bortez/Cont=	6.47059	7.64706		Cont/Cont=	1.29412	0.705882	>5	=Avg Bort/Cont (1h, 500nM)
SH-SY5Y	bortezomib 1h, 500nM	2	2	1584.85								Bortez/Cont=	14.8571	18.5714		Cont/Cont=	1.14286	0.857143	>5	=Avg Bort/Cont (1h, 500nM)
SH-SY5Y	bortezomib 1h, 500nM	3	1	1589.74								Bortez/Cont=	0.754717	0.622642		Cont/Cont=	1.16981	0.830189	0.688679	=Avg Bort/Cont (1h, 500nM)
SH-SY5Y	bortezomib 1h, 500nM	2	2	1620.82								Bortez/Cont=	0.888889	0.666667		Cont/Cont=	1.11111	0.888889	0.777778	=Avg Bort/Cont (1h, 500nM)
SH-SY5Y	bortezomib 1h, 500nM	3	2	1620.84								Bortez/Cont=	0.694737	0.842105		Cont/Cont=	0.947368	1.05263	0.768421	=Avg Bort/Cont (1h, 500nM)
SH-SY5Y	bortezomib 1h, 500nM	2	2	1622.77								Bortez/Cont=	1.05747	1.03448		Cont/Cont=	1.01149	0.988506	1.04598	=Avg Bort/Cont (1h, 500nM)
SH-SY5Y	bortezomib 1h, 500nM	4	2	1626.87								Bortez/Cont=	1.63077	0.830769		Cont/Cont=	1.23077	0.769231	1.23077	=Avg Bort/Cont (1h, 500nM)
SH-SY5Y	bortezomib 1h, 500nM	2	1	1661.78								Bortez/Cont=	0.842105	0.947368		Cont/Cont=	1.05263	0.947368	0.894737	=Avg Bort/Cont (1h, 500nM)
SH-SY5Y	bortezomib 1h, 500nM	3	3	1668.93								Bortez/Cont=	7.625	3.75		Cont/Cont=	1.125	0.875	>5	=Avg Bort/Cont (1h, 500nM)
SH-SY5Y	bortezomib 1h, 500nM	2	1	1679.75								Bortez/Cont=	0.956522	0.956522		Cont/Cont=	1.04348	0.956522	0.956522	=Avg Bort/Cont (1h, 500nM)
SH-SY5Y	bortezomib 1h, 500nM	2	1	1684.87								Bortez/Cont=	<0.2	<0.2		Cont/Cont=	1.2381	0.761905	<0.2	=Avg Bort/Cont (1h, 500nM)
SH-SY5Y	bortezomib 1h, 500nM	2	1	1712.86								Bortez/Cont=	>5	>5		Cont/Cont=	nd	nd	>5	=Avg Bort/Cont (1h, 500nM)
SH-SY5Y	bortezomib 1h, 500nM	2	1	1758.92								Bortez/Cont=	1.2	1.08571		Cont/Cont=	1.14286	0.857143	1.14286	=Avg Bort/Cont (1h, 500nM)
SH-SY5Y	bortezomib 1h, 500nM	4	3	1781.06								Bortez/Cont=	0.25974	0.12987		Cont/Cont=	1.42857	0.571429	0.194805	=Avg Bort/Cont (1h, 500nM)
SH-SY5Y	bortezomib 1h, 500nM	2	1	1826.93								Bortez/Cont=	1.14286	1.57143		Cont/Cont=	1	1	1.35714	=Avg Bort/Cont (1h, 500nM)
SH-SY5Y	bortezomib 1h, 500nM	3	2	1863.95								Bortez/Cont=	>5	>5		Cont/Cont=	nd	nd	>5	=Avg Bort/Cont (1h, 500nM)
SH-SY5Y	bortezomib 1h, 500nM	3	2	1891.02								Bortez/Cont=	1.41732	0.834646		Cont/Cont=	1.12861	0.871391	1.12598	=Avg Bort/Cont (1h, 500nM)
SH-SY5Y	bortezomib 1h, 500nM	2	1	1899.91								Bortez/Cont=	0.49505	0.693069		Cont/Cont=	1.0495	0.950495	0.594059	=Avg Bort/Cont (1h, 500nM)
SH-SY5Y	bortezomib 1h, 500nM	3	1	1899.91								Bortez/Cont=	0.27027	0.540541		Cont/Cont=	1.08108	0.918919	0.405405	=Avg Bort/Cont (1h, 500nM)
SH-SY5Y	bortezomib 1h, 500nM	3	2	1925.06								Bortez/Cont=	0.724638	1.5942		Cont/Cont=	1.07246	0.927536	1.15942	=Avg Bort/Cont (1h, 500nM)
SH-SY5Y	bortezomib 1h, 500nM	4	3	1925.13								Bortez/Cont=	1.45763	0.732203		Cont/Cont=	1.19661	0.80339	1.09492	=Avg Bort/Cont (1h, 500nM)
SH-SY5Y	bortezomib 1h, 500nM	3	2	1930								Bortez/Cont=	0.47619	0.333333		Cont/Cont=	1.2381	0.761905	0.404762	=Avg Bort/Cont (1h, 500nM)
SH-SY5Y	bortezomib 1h, 500nM	3	3	1954.05								Bortez/Cont=	2.39583	2.09375		Cont/Cont=	1.07292	0.927083	2.24479	=Avg Bort/Cont (1h, 500nM)
SH-SY5Y	bortezomib 1h, 500nM	4	2	1983.12								Bortez/Cont=	1.47851	1.22636		Cont/Cont=	1.13467	0.86533	1.35244	=Avg Bort/Cont (1h, 500nM)
SH-SY5Y	bortezomib 1h, 500nM	3	1	1986.01								Bortez/Cont=	0.571429	0.666667		Cont/Cont=	1.04762	0.952381	0.619048	=Avg Bort/Cont (1h, 500nM)
SH-SY5Y	bortezomib 1h, 500nM	3	2	1988.02								Bortez/Cont=	0.893617	1.08511		Cont/Cont=	0.93617	1.06383	0.989362	=Avg Bort/Cont (1h, 500nM)
SH-SY5Y	bortezomib 1h, 500nM	3	1	2011								Bortez/Cont=	0.361446	0.578313		Cont/Cont=	1.15663	0.843373	0.46988	=Avg Bort/Cont (1h, 500nM)
SH-SY5Y	bortezomib 1h, 500nM	2	1	2011								Bortez/Cont=	0.428571	0.612245		Cont/Cont=	1.12245	0.877551	0.520408	=Avg Bort/Cont (1h, 500nM)
SH-SY5Y	bortezomib 1h, 500nM	3	1	2015.97								Bortez/Cont=	>5	>5		Cont/Cont=	nd	nd	>5	=Avg Bort/Cont (1h, 500nM)
SH-SY5Y	bortezomib 1h, 500nM	3	1	2015.99								Bortez/Cont=	1.85366	2.78049		Cont/Cont=	1.21951	0.780488	2.31707	=Avg Bort/Cont (1h, 500nM)
SH-SY5Y	bortezomib 1h, 500nM	2	1	2072.02								Bortez/Cont=	0.705882	0.705882		Cont/Cont=	1.17647	0.823529	0.705882	=Avg Bort/Cont (1h, 500nM)
SH-SY5Y	bortezomib 1h, 500nM	2	1	2073.92								Bortez/Cont=	0.933333	0.933333		Cont/Cont=	1.33333	0.666667	0.933333	=Avg Bort/Cont (1h, 500nM)
SH-SY5Y	bortezomib 1h, 500nM	3	1	2082.02								Bortez/Cont=	0.47619	0.428571		Cont/Cont=	1.04762	0.952381	0.452381	=Avg Bort/Cont (1h, 500nM)
SH-SY5Y	bortezomib 1h, 500nM	2	1	2082.02								Bortez/Cont=	0.428571	0.47619		Cont/Cont=	1.2381	0.761905	0.452381	=Avg Bort/Cont (1h, 500nM)
SH-SY5Y	bortezomib 1h, 500nM	3	1	2127.19								Bortez/Cont=	<0.2	<0.2		Cont/Cont=	1.28571	0.714286	<0.2	=Avg Bort/Cont (1h, 500nM)
SH-SY5Y	bortezomib 1h, 500nM	3	2	2133.13								Bortez/Cont=	<0.2	<0.2		Cont/Cont=	1.125	0.875	<0.2	=Avg Bort/Cont (1h, 500nM)
SH-SY5Y	bortezomib 1h, 500nM	2	2	2164.25								Bortez/Cont=	>5	>5		Cont/Cont=	nd	nd	>5	=Avg Bort/Cont (1h, 500nM)
SH-SY5Y	bortezomib 1h, 500nM	2	2	2226.15								Bortez/Cont=	0.769231	1.6		Cont/Cont=	1.07692	0.923077	1.18462	=Avg Bort/Cont (1h, 500nM)
SH-SY5Y	bortezomib 1h, 500nM	4	2	2226.22								Bortez/Cont=	0.925926	1.66667		Cont/Cont=	1.03704	0.962963	1.2963	=Avg Bort/Cont (1h, 500nM)
SH-SY5Y	bortezomib 1h, 500nM	3	3	2226.23								Bortez/Cont=	1.45374	0.656388		Cont/Cont=	1.22026	0.779736	1.05507	=Avg Bort/Cont (1h, 500nM)
SH-SY5Y	bortezomib 1h, 500nM	3	3	2226.23								Bortez/Cont=	1.63366	0.737624		Cont/Cont=	1.12376	0.876238	1.18564	=Avg Bort/Cont (1h, 500nM)
SH-SY5Y	bortezomib 1h, 500nM	4	3	2226.24								Bortez/Cont=	1.33272	0.608295		Cont/Cont=	1.20553	0.79447	0.970507	=Avg Bort/Cont (1h, 500nM)
SH-SY5Y	bortezomib 1h, 500nM	3	2	2226.25								Bortez/Cont=	0.666667	1.73333		Cont/Cont=	1	1	1.2	=Avg Bort/Cont (1h, 500nM)
SH-SY5Y	bortezomib 1h, 500nM	3	1	2238.13								Bortez/Cont=	0.60274	0.60274		Cont/Cont=	1.23288	0.767123	0.60274	=Avg Bort/Cont (1h, 500nM)
SH-SY5Y	bortezomib 1h, 500nM	3	2	2276.25								Bortez/Cont=	<0.2	<0.2		Cont/Cont=	1.17647	0.823529	<0.2	=Avg Bort/Cont (1h, 500nM)
SH-SY5Y	bortezomib 1h, 500nM	4	3	2284.22								Bortez/Cont=	0.547945	0.383562		Cont/Cont=	1.17808	0.821918	0.465753	=Avg Bort/Cont (1h, 500nM)
SH-SY5Y	bortezomib 1h, 500nM	3	2	2311.26								Bortez/Cont=	0.604651	0.418605		Cont/Cont=	1.16279	0.837209	0.511628	=Avg Bort/Cont (1h, 500nM)
SH-SY5Y	bortezomib 1h, 500nM	4	2	2365.19								Bortez/Cont=	0.795699	0.795699		Cont/Cont=	1.1828	0.817204	0.795699	=Avg Bort/Cont (1h, 500nM)
SH-SY5Y	bortezomib 1h, 500nM	3	2	2365.19								Bortez/Cont=	0.988764	0.831461		Cont/Cont=	1.19101	0.808989	0.910112	=Avg Bort/Cont (1h, 500nM)
SH-SY5Y	bortezomib 1h, 500nM	5	1	2377.27								Bortez/Cont=	1.16596	1.20851		Cont/Cont=	1.16596	0.834043	1.18723	=Avg Bort/Cont (1h, 500nM)
SH-SY5Y	bortezomib 1h, 500nM	4	3	2406.16								Bortez/Cont=	>5	>5		Cont/Cont=	nd	nd	>5	=Avg Bort/Cont (1h, 500nM)
SH-SY5Y	bortezomib 1h, 500nM	4	2	2406.16								Bortez/Cont=	>5	>5		Cont/Cont=	nd	nd	>5	=Avg Bort/Cont (1h, 500nM)
SH-SY5Y	bortezomib 1h, 500nM	4	2	2521.28								Bortez/Cont=	0.5	0.625		Cont/Cont=	1.05	0.95	0.5625	=Avg Bort/Cont (1h, 500nM)
SH-SY5Y	bortezomib 1h, 500nM	4	2	2525.24								Bortez/Cont=	0.409091	0.272727		Cont/Cont=	1.09091	0.909091	0.340909	=Avg Bort/Cont (1h, 500nM)
SH-SY5Y	bortezomib 1h, 500nM	3	3	2548.33								Bortez/Cont=	0.553846	0.461538		Cont/Cont=	1.23077	0.769231	0.507692	=Avg Bort/Cont (1h, 500nM)
SH-SY5Y	bortezomib 1h, 500nM	3	2	2548.36								Bortez/Cont=	<0.2	<0.2		Cont/Cont=	1.16667	0.833333	<0.2	=Avg Bort/Cont (1h, 500nM)
SH-SY5Y	bortezomib 1h, 500nM	2	1	2613.12								Bortez/Cont=	1	0.8		Cont/Cont=	1.28571	0.714286	0.9	=Avg Bort/Cont (1h, 500nM)
SH-SY5Y	bortezomib 1h, 500nM	3	1	2613.19								Bortez/Cont=	0.8	1		Cont/Cont=	1.28571	0.714286	0.9	=Avg Bort/Cont (1h, 500nM)
SH-SY5Y	bortezomib 1h, 500nM	3	2	2658.36								Bortez/Cont=	0.666667	0.393939		Cont/Cont=	1.27273	0.727273	0.530303	=Avg Bort/Cont (1h, 500nM)
SH-SY5Y	bortezomib 1h, 500nM	2	2	2658.4								Bortez/Cont=	0.586667	0.373333		Cont/Cont=	1.2	0.8	0.48	=Avg Bort/Cont (1h, 500nM)
SH-SY5Y	bortezomib 1h, 500nM	4	2	2659.22								Bortez/Cont=	1.34146	0.97561		Cont/Cont=	1.26829	0.731707	1.15854	=Avg Bort/Cont (1h, 500nM)
SH-SY5Y	bortezomib 1h, 500nM	3	3	2704.4								Bortez/Cont=	1.0989	0.923077		Cont/Cont=	0.967033	1.03297	1.01099	=Avg Bort/Cont (1h, 500nM)
SH-SY5Y	bortezomib 1h, 500nM	3	1	2798.98								Bortez/Cont=	0.795455	1.18182		Cont/Cont=	1.31818	0.681818	0.988636	=Avg Bort/Cont (1h, 500nM)
SH-SY5Y	bortezomib 1h, 500nM	3	1	2883.34								Bortez/Cont=	0.84507	0.985915		Cont/Cont=	1.12676	0.873239	0.915493	=Avg Bort/Cont (1h, 500nM)
SH-SY5Y	bortezomib 1h, 500nM	4	4	2924.61								Bortez/Cont=	<0.2	<0.2		Cont/Cont=	1.16667	0.833333	<0.2	=Avg Bort/Cont (1h, 500nM)
SH-SY5Y	bortezomib 1h, 500nM	3	2	3028.53								Bortez/Cont=	<0.2	<0.2		Cont/Cont=	1.15625	0.84375	<0.2	=Avg Bort/Cont (1h, 500nM)
SH-SY5Y	bortezomib 1h, 500nM	3	3	3028.55								Bortez/Cont=	<0.2	<0.2		Cont/Cont=	1.20635	0.793651	<0.2	=Avg Bort/Cont (1h, 500nM)
SH-SY5Y	bortezomib 1h, 500nM	3	2	3046.44								Bortez/Cont=	>5	>5		Cont/Cont=	nd	nd	>5	=Avg Bort/Cont (1h, 500nM)
SH-SY5Y	bortezomib 1h, 500nM	2	2	3049.53								Bortez/Cont=	0.666667	0.444444		Cont/Cont=	1.11111	0.888889	0.555556	=Avg Bort/Cont (1h, 500nM)
SH-SY5Y	bortezomib 1h, 500nM	4	1	3076.49								Bortez/Cont=	0.654545	0.727273		Cont/Cont=	1.12727	0.872727	0.690909	=Avg Bort/Cont (1h, 500nM)
SH-SY5Y	bortezomib 1h, 500nM	3	1	3076.51								Bortez/Cont=	0.556522	0.782609		Cont/Cont=	1.25217	0.747826	0.669565	=Avg Bort/Cont (1h, 500nM)
SH-SY5Y	bortezomib 1h, 500nM	4	2	3094.52								Bortez/Cont=	0.701299	0.649351		Cont/Cont=	1.03896	0.961039	0.675325	=Avg Bort/Cont (1h, 500nM)
SH-SY5Y	bortezomib 1h, 500nM	4	4	3106.5								Bortez/Cont=	0.996587	0.730375		Cont/Cont=	1.05119	0.948805	0.863481	=Avg Bort/Cont (1h, 500nM)
SH-SY5Y	bortezomib 1h, 500nM	4	4	3107.49								Bortez/Cont=	1.09756	0.731707		Cont/Cont=	1.02439	0.97561	0.914634	=Avg Bort/Cont (1h, 500nM)
SH-SY5Y	bortezomib 1h, 500nM	2	1	3145.34								Bortez/Cont=	<0.2	<0.2		Cont/Cont=	0.857143	1.14286	<0.2	=Avg Bort/Cont (1h, 500nM)
SH-SY5Y	bortezomib 1h, 500nM	3	1	3145.35								Bortez/Cont=	<0.2	<0.2		Cont/Cont=	1.1	0.9	<0.2	=Avg Bort/Cont (1h, 500nM)
SH-SY5Y	bortezomib 1h, 500nM	4	2	3248.64								Bortez/Cont=	0.728606	0.484108		Cont/Cont=	1.15403	0.845966	0.606357	=Avg Bort/Cont (1h, 500nM)
SH-SY5Y	bortezomib 1h, 500nM	3	2	3436.56								Bortez/Cont=	1.05263	0.877193		Cont/Cont=	1.12281	0.877193	0.964912	=Avg Bort/Cont (1h, 500nM)
SH-SY5Y	bortezomib 1h, 500nM	5	4	3870.52								Bortez/Cont=	1.25	0.75		Cont/Cont=	1	1	1	=Avg Bort/Cont (1h, 500nM)
SH-SY5Y	bortezomib 1h, 500nM	6	3	4120.9								Bortez/Cont=	0.363636	0.424242		Cont/Cont=	1.36364	0.636364	0.393939	=Avg Bort/Cont (1h, 500nM)
SH-SY5Y	bortezomib 1h, 500nM	4	3	4120.92								Bortez/Cont=	0.430769	0.369231		Cont/Cont=	1.38462	0.615385	0.4	=Avg Bort/Cont (1h, 500nM)
SH-SY5Y	bortezomib 1h, 500nM	5	3	4120.96								Bortez/Cont=	0.327869	0.360656		Cont/Cont=	1.47541	0.52459	0.344262	=Avg Bort/Cont (1h, 500nM)
SH-SY5Y	bortezomib 1h, 500nM	12	7	8564.18							Average mass	Bortez/Cont=	1.05882	0.823529		Cont/Cont=	1.17647	0.823529	0.941176	=Avg Bort/Cont (1h, 500nM)
SH-SY5Y	bortezomib 1h, 500nM	13	7	8564.21							Average mass	Bortez/Cont=	1.05882	0.941176		Cont/Cont=	1.05882	0.941176	1	=Avg Bort/Cont (1h, 500nM)
SH-SY5Y	bortezomib 1h, 500nM	11	7	8564.91							Average mass	Bortez/Cont=	1.06667	1.06667		Cont/Cont=	1.2	0.8	1.06667	=Avg Bort/Cont (1h, 500nM)
HEK293T	bortezomib 1h, 50nM	2	2	709.45	709.401	Macrophage migration inhibitory factor	cytoplasm	r	SYSKLL	c		Bortez/Cont=	>5	>5	>5	Cont/Cont=	nd	nd	>5	=Avg Bort/Cont (1h, 50nM)
HEK293T	bortezomib 1h, 50nM	2	2	743.509	743.454	60S acidic ribosomal protein P2	cytoplasm	q	GIGKLASV	p		Bortez/Cont=	>5	>5	>5	Cont/Cont=	nd	nd	>5	=Avg Bort/Cont (1h, 50nM)
HEK293T	bortezomib 1h, 50nM	1	1	773.383	773.375	Heterogeneous nuclear ribonucleoproteins A2/B1 (the motif GFGFVTF is also found in several other proteins!!!)	nucleus	r	GFGFVTF	d		Bortez/Cont=	>5	>5	>5	Cont/Cont=	nd	nd	>5	=Avg Bort/Cont (1h, 50nM)
HEK293T	bortezomib 1h, 50nM	2	2	782.478	782.433	Nucleophosmin	nucleus	a	KFINYV	k		Bortez/Cont=	7.77778	4.44444	2.66667	Cont/Cont=	1.11111	0.888889	4.96296	=Avg Bort/Cont (1h, 50nM)
HEK293T	bortezomib 1h, 50nM	2	2	825.556	825.496	Triosephosphate isomerase 1	cytoplasm	k	LDPKIAVA	a		Bortez/Cont=	1.10204	0.612245	0.408163	Cont/Cont=	0.897959	1.10204	0.707483	=Avg Bort/Cont (1h, 50nM)
HEK293T	bortezomib 1h, 50nM	2	2	842.564	842.511	FK506 Binding Protein	cytoplasm	d	VELLKLE	*		Bortez/Cont=	2.98551	2.2029	1.91304	Cont/Cont=	0.956522	1.04348	2.36715	=Avg Bort/Cont (1h, 50nM)
HEK293T	bortezomib 1h, 50nM	2	2	856.495	856.465	Nucleophosmin	nucleus	k	GGSLPKVEA	k		Bortez/Cont=	>5	>5	>5	Cont/Cont=	nd	nd	>5	=Avg Bort/Cont (1h, 50nM)
HEK293T	bortezomib 1h, 50nM	2	1	858.516	858.496	Heat shock 10kDa protein 1 (chaperonin 10)	mitochondria	f	LPLFDRV	l		Bortez/Cont=	>5	>5	>5	Cont/Cont=	nd	nd	>5	=Avg Bort/Cont (1h, 50nM)
HEK293T	bortezomib 1h, 50nM	2	1	871.487	871.476	Splicing factor, arginine/serine-rich 1	cytoplasm	y	GAIRDIDL	k		Bortez/Cont=	1.57895	1.05263	0.736842	Cont/Cont=	1.05263	0.947368	1.12281	=Avg Bort/Cont (1h, 50nM)
HEK293T	bortezomib 1h, 50nM	2	1	906.507	906.496	Heat shock 10kDa protein 1 (chaperonin 10)	mitochondria	k	FLPLFDR	v		Bortez/Cont=	>5	>5	>5	Cont/Cont=	nd	nd	>5	=Avg Bort/Cont (1h, 50nM)
HEK293T	bortezomib 1h, 50nM	2	1	926.557	926.555	Vimentin	cytoplasm	r	SSVPGVRLL	q		Bortez/Cont=	3.66667	2.06061	1.78788	Cont/Cont=	1.15152	0.848485	2.50505	=Avg Bort/Cont (1h, 50nM)
HEK293T	bortezomib 1h, 50nM	2	2	949.553	949.487	40S Ribosomal protein S21	cytoplasm	k	ADGIVSKNF	*		Bortez/Cont=	2.36364	1.54545	0.818182	Cont/Cont=	1.18182	0.818182	1.57576	=Avg Bort/Cont (1h, 50nM)
HEK293T	bortezomib 1h, 50nM	2	1	965.458	965.508	Heat shock 10kDa protein 1 (chaperonin 10)	mitochondria	*m	Ac-AGQAFRKF	l		Bortez/Cont=	>5	>5	>5	Cont/Cont=	nd	nd	>5	=Avg Bort/Cont (1h, 50nM)
HEK293T	bortezomib 1h, 50nM	2	1	1004.52	1004.53	Histone H2B	nucleus	f	VNDIFERI	i		Bortez/Cont=	>5	>5	>5	Cont/Cont=	nd	nd	>5	=Avg Bort/Cont (1h, 50nM)
HEK293T	bortezomib 1h, 50nM	2	2	1007.56	1007.51	Eukaryotic translation elongation factor 1 beta	cytoplasm	s	MDVAAFNKI	*		Bortez/Cont=	>5	>5	>5	Cont/Cont=	nd	nd	>5	=Avg Bort/Cont (1h, 50nM)
HEK293T	bortezomib 1h, 50nM	2	1	1011.64	1011.63	Protein DJ-1 ( Parkinson disease protein 7)	nucleus	*m	Ac-ASKRALVIL	a		Bortez/Cont=	0.285714	0.25	0.25	Cont/Cont=	0.964286	1.03571	0.261905	=Avg Bort/Cont (1h, 50nM)
HEK293T	bortezomib 1h, 50nM	2	2	1039.59	1039.55	Peptidylprolyl isomerase A	cytoplasm	l	KHTGPGILSM	a		Bortez/Cont=	<0.2	<0.2	<0.2	Cont/Cont=	1.05579	0.944206	<0.2	=Avg Bort/Cont (1h, 50nM)
HEK293T	bortezomib 1h, 50nM	1	1	1050.51	1050.54	Peptidylprolyl isomerase A	cytoplasm	*m	VNPTVFFDI	a		Bortez/Cont=	0.530612	0.326531	0.204082	Cont/Cont=	1.10204	0.897959	0.353741	=Avg Bort/Cont (1h, 50nM)
HEK293T	bortezomib 1h, 50nM	2	1	1050.54	1050.54	Peptidylprolyl isomerase A	cytoplasm	*m	VNPTVFFDI	a		Bortez/Cont=	0.509804	0.509804	0.392157	Cont/Cont=	1.05882	0.941176	0.470588	=Avg Bort/Cont (1h, 50nM)
HEK293T	bortezomib 1h, 50nM	2	1	1054.6	1054.6	Peroxiredoxin 5	mitochondria	c	SLAPNIISQL	*		Bortez/Cont=	0.588235	0.352941	0.411765	Cont/Cont=	1	1	0.45098	=Avg Bort/Cont (1h, 50nM)
HEK293T	bortezomib 1h, 50nM	2	2	1060.59	1060.56	Eukaryotic translation elongation factor 1 beta	cytoplasm	*m	GFGDLKSPAGL	q		Bortez/Cont=	2.64	1.76	1.2	Cont/Cont=	1.04	0.96	1.86667	=Avg Bort/Cont (1h, 50nM)
HEK293T	bortezomib 1h, 50nM	2	2	1061.6	1061.58	Thioredoxin	nucleus	a	AGDKLVVVDF	s		Bortez/Cont=	>5	>5	>5	Cont/Cont=	nd	nd	>5	=Avg Bort/Cont (1h, 50nM)
HEK293T	bortezomib 1h, 50nM	2	2	1076.59	1076.59	Peroxiredoxin 1	cytoplasm	t	IAQDYGVLKA	d		Bortez/Cont=	2.12698	1.36508	1.14286	Cont/Cont=	0.952381	1.04762	1.54497	=Avg Bort/Cont (1h, 50nM)
HEK293T	bortezomib 1h, 50nM	3	3	1077.64	1077.58	40S Ribosomal protein S21	cytoplasm	a	KADGIVSKNF	*		Bortez/Cont=	1.70861	1.16556	0.728477	Cont/Cont=	0.887417	1.11258	1.20088	=Avg Bort/Cont (1h, 50nM)
HEK293T	bortezomib 1h, 50nM	2	3	1077.68	1077.58	40S Ribosomal protein S21	cytoplasm	a	KADGIVSKNF	*		Bortez/Cont=	2.0597	1.19403	0.776119	Cont/Cont=	0.955224	1.04478	1.34328	=Avg Bort/Cont (1h, 50nM)
HEK293T	bortezomib 1h, 50nM	2	1	1078.59	1078.59	Heat shock 10kDa protein 1 (chaperonin 10)	mitochondria	*m	Ac-AGQAFRKFL	p		Bortez/Cont=	3.47619	2.7619	2.52381	Cont/Cont=	0.857143	1.14286	2.92063	=Avg Bort/Cont (1h, 50nM)
HEK293T	bortezomib 1h, 50nM	3	1	1082.66	1082.66	Vimentin	cytoplasm	l	RSSVPGVRLL	q		Bortez/Cont=	1.26316	0.912281	0.526316	Cont/Cont=	1.01754	0.982456	0.900585	=Avg Bort/Cont (1h, 50nM)
HEK293T	bortezomib 1h, 50nM	2	1	1082.7	1082.67	Protein DJ-1 ( Parkinson disease protein 7)	nucleus	*m	Ac-ASKRALVILA	k		Bortez/Cont=	0.517241	0.293103	0.258621	Cont/Cont=	0.965517	1.03448	0.356322	=Avg Bort/Cont (1h, 50nM)
HEK293T	bortezomib 1h, 50nM	2	1	1086.58	1086.59	Triosephosphate isomerase 1	cytoplasm	q	SLGELIGTLNA	a		Bortez/Cont=	1.69697	0.848485	0.666667	Cont/Cont=	0.969697	1.0303	1.07071	=Avg Bort/Cont (1h, 50nM)
HEK293T	bortezomib 1h, 50nM	3	2	1092.74	1092.68	Cytochrome c oxidase subunit 7c	mitochondria	l	VVRHQLLKT	*		Bortez/Cont=	1.2381	0.8	0.761905	Cont/Cont=	1.04762	0.952381	0.933333	=Avg Bort/Cont (1h, 50nM)
HEK293T	bortezomib 1h, 50nM	2	2	1093.57	1093.53	Heat shock 10kDa protein 1 (chaperonin 10)	mitochondria	r	DGDILGKYVD	*		Bortez/Cont=	>5	>5	>5	Cont/Cont=	nd	nd	>5	=Avg Bort/Cont (1h, 50nM)
HEK293T	bortezomib 1h, 50nM	2	2	1128.66	1128.64	Thioredoxin	nucleus	e	KLEATINELV	*		Bortez/Cont=	>5	>5	>5	Cont/Cont=	nd	nd	>5	=Avg Bort/Cont (1h, 50nM)
HEK293T	bortezomib 1h, 50nM	2	2	1138.63	1138.63	Triosephosphate isomerase 1	cytoplasm	k	LDPKIAVAAQN	c		Bortez/Cont=	0.9375	0.625	0.625	Cont/Cont=	1.0625	0.9375	0.729167	=Avg Bort/Cont (1h, 50nM)
HEK293T	bortezomib 1h, 50nM	3	3	1148.7	1148.62	40S Ribosomal protein S21	cytoplasm	l	AKADGIVSKNF	*		Bortez/Cont=	1.06897	0.482759	0.206897	Cont/Cont=	1.06897	0.931034	0.586207	=Avg Bort/Cont (1h, 50nM)
HEK293T	bortezomib 1h, 50nM	2	3	1148.71	1148.62	40S Ribosomal protein S21	cytoplasm	l	AKADGIVSKNF	*		Bortez/Cont=	1.0625	0.375	0.125	Cont/Cont=	1.125	0.875	0.520833	=Avg Bort/Cont (1h, 50nM)
HEK293T	bortezomib 1h, 50nM	2	2	1174.58	1174.55	Heat shock 10kDa protein 1 (chaperonin 10)	mitochondria	v	LDDKDYFLF	r		Bortez/Cont=	>5	>5	>5	Cont/Cont=	nd	nd	>5	=Avg Bort/Cont (1h, 50nM)
HEK293T	bortezomib 1h, 50nM	2	1	1199.68	1199.69	Heat shock 10kDa protein 1 (chaperonin 10)	mitochondria	f	LPLFDRVLVE	r		Bortez/Cont=	>5	>5	>5	Cont/Cont=	nd	nd	>5	=Avg Bort/Cont (1h, 50nM)
HEK293T	bortezomib 1h, 50nM	2	2	1203.7	1203.67	FK506 Binding Protein	cytoplasm	l	VFDVELLKLE	*		Bortez/Cont=	1.53684	0.884211	0.463158	Cont/Cont=	0.968421	1.03158	0.961404	=Avg Bort/Cont (1h, 50nM)
HEK293T	bortezomib 1h, 50nM	2	1	1212.64	1212.65	Histidine triad nucleotide-binding protein 1	cytoplasm	*m	Ac-ADEIAKAQVAR	p		Bortez/Cont=	1.85185	1.61481	1.54074	Cont/Cont=	0.918519	1.08148	1.66914	=Avg Bort/Cont (1h, 50nM)
HEK293T	bortezomib 1h, 50nM	2	1	1228.67	1228.7	Far upstream element-binding protein 1	nucleus	a	AEIITDLLRSV	q		Bortez/Cont=	>5	>5	>5	Cont/Cont=	nd	nd	>5	=Avg Bort/Cont (1h, 50nM)
HEK293T	bortezomib 1h, 50nM	2	1	1236.56	1236.58	Complement component 1 Q subcomponent-binding protein, mitochondrial	mitochondria	w	ALYDHLMDFL	a		Bortez/Cont=	4.42424	2.42424	1.51515	Cont/Cont=	0.909091	1.09091	2.78788	=Avg Bort/Cont (1h, 50nM)
HEK293T	bortezomib 1h, 50nM	3	1	1242.71	1242.71	Heat shock 10kDa protein 1 (chaperonin 10)	mitochondria	l	PLFDRVLVER	s		Bortez/Cont=	>5	>5	>5	Cont/Cont=	nd	nd	>5	=Avg Bort/Cont (1h, 50nM)
HEK293T	bortezomib 1h, 50nM	2	1	1245.64	1245.64	Peptidylprolyl isomerase A	cytoplasm	i	AVDGEPLGRVSF	e		Bortez/Cont=	0.94	0.6	0.6	Cont/Cont=	0.94	1.06	0.713333	=Avg Bort/Cont (1h, 50nM)
HEK293T	bortezomib 1h, 50nM	3	2	1249.66	1249.63	Heat shock 10kDa protein 1 (chaperonin 10)	mitochondria	f	RDGDILGKYVD	*		Bortez/Cont=	2.61856	2.08247	1.62887	Cont/Cont=	1.03093	0.969072	2.10997	=Avg Bort/Cont (1h, 50nM)
HEK293T	bortezomib 1h, 50nM	2	2	1249.67	1249.63	Heat shock 10kDa protein 1 (chaperonin 10)	mitochondria	f	RDGDILGKYVD	*		Bortez/Cont=	5	3.26667	2.46667	Cont/Cont=	1	1	3.57778	=Avg Bort/Cont (1h, 50nM)
HEK293T	bortezomib 1h, 50nM	2	1	1254.72	1254.73	Far upstream element-binding protein 2	nucleus	a	ARIINDLLQSL	r		Bortez/Cont=	0.315789	0.231579	0.168421	Cont/Cont=	0.842105	1.15789	0.238596	=Avg Bort/Cont (1h, 50nM)
HEK293T	bortezomib 1h, 50nM	3	2	1269.76	1269.71	Splicing factor, arginine/serine-rich 1	cytoplasm	y	GAIRDIDLKNR	r		Bortez/Cont=	3.21739	3.47826	2.95652	Cont/Cont=	1.04348	0.956522	3.21739	=Avg Bort/Cont (1h, 50nM)
HEK293T	bortezomib 1h, 50nM	4	2	1269.78	1269.71	Splicing factor, arginine/serine-rich 1	cytoplasm	y	GAIRDIDLKNR	r		Bortez/Cont=	4.28571	5.28571	4.14286	Cont/Cont=	0.857143	1.14286	4.57143	=Avg Bort/Cont (1h, 50nM)
HEK293T	bortezomib 1h, 50nM	2	2	1273.66	1273.62	Heat shock 10kDa protein 1 (chaperonin 10)	mitochondria	v	VLDDKDYFLF	r		Bortez/Cont=	5.48148	2.96296	2.59259	Cont/Cont=	0.888889	1.11111	3.67901	=Avg Bort/Cont (1h, 50nM)
HEK293T	bortezomib 1h, 50nM	2	2	1287.68	1287.68	Eukaryotic translation elongation factor 1 beta	cytoplasm	*m	GFGDLKSPAGLQV	l		Bortez/Cont=	2.27692	1.69231	1.26154	Cont/Cont=	0.923077	1.07692	1.74359	=Avg Bort/Cont (1h, 50nM)
HEK293T	bortezomib 1h, 50nM	2	1	1308.69	1308.72	NADH dehydrogenase 1 alpha subcomplex, 8	mitochondria	*m	PGIVELPTLEEL	k		Bortez/Cont=	<0.2	<0.2	<0.2	Cont/Cont=	1.04	0.96	<0.2	=Avg Bort/Cont (1h, 50nM)
HEK293T	bortezomib 1h, 50nM	2	1	1328.66	1328.71	40S Ribosomal protein S28	cytoplasm	*	Ac-MDTSRVQPIKL	a		Bortez/Cont=	1.54545	1.13636	0.886364	Cont/Cont=	0.954545	1.04545	1.18939	=Avg Bort/Cont (1h, 50nM)
HEK293T	bortezomib 1h, 50nM	3	2	1330.7	1330.66	Heat shock 10kDa protein 1 (chaperonin 10)	mitochondria	v	LDDKDYFLFR	d		Bortez/Cont=	>5	>5	>5	Cont/Cont=	nd	nd	>5	=Avg Bort/Cont (1h, 50nM)
HEK293T	bortezomib 1h, 50nM	2	1	1332.68	1332.73	NHP2 non-histone chromosome protein 2-like 1	nucleus	a	ADAEPLEIILHL	p		Bortez/Cont=	0.609524	0.380952	0.380952	Cont/Cont=	0.952381	1.04762	0.457143	=Avg Bort/Cont (1h, 50nM)
HEK293T	bortezomib 1h, 50nM	2	2	1342.76	1342.72	Macrophage migration inhibitory factor	cytoplasm	l	AQATGKPPQYIAV	h		Bortez/Cont=	3.88889	2.22222	1.66667	Cont/Cont=	1	1	2.59259	=Avg Bort/Cont (1h, 50nM)
HEK293T	bortezomib 1h, 50nM	2	1	1346.65	1346.67	Macrophage migration inhibitory factor	cytoplasm	v	PDGFLSELTQQL	a		Bortez/Cont=	>5	>5	>5	Cont/Cont=	nd	nd	>5	=Avg Bort/Cont (1h, 50nM)
HEK293T	bortezomib 1h, 50nM	2	1	1346.71	1346.76	Heat shock 10kDa protein 1 (chaperonin 10)	mitochondria	k	FLPLFDRVLVE	r		Bortez/Cont=	>5	>5	>5	Cont/Cont=	nd	nd	>5	=Avg Bort/Cont (1h, 50nM)
HEK293T	bortezomib 1h, 50nM	3	1	1355.77	1355.79	Heat shock 10kDa protein 1 (chaperonin 10)	mitochondria	f	LPLFDRVLVER	s		Bortez/Cont=	>5	>5	>5	Cont/Cont=	nd	nd	>5	=Avg Bort/Cont (1h, 50nM)
HEK293T	bortezomib 1h, 50nM	2	2	1356.76	1356.71	Cytochrome c oxidase subunit 5a	mitochondria	l	GISTPEELGLDKV	*		Bortez/Cont=	0.977444	0.827068	0.75188	Cont/Cont=	0.902256	1.09774	0.85213	=Avg Bort/Cont (1h, 50nM)
HEK293T	bortezomib 1h, 50nM	2	2	1365.81	1365.8	60S acidic ribosomal protein P2	cytoplasm	q	GIGKLASVPAGGAVAV	s		Bortez/Cont=	>5	>5	>5	Cont/Cont=	nd	nd	>5	=Avg Bort/Cont (1h, 50nM)
HEK293T	bortezomib 1h, 50nM	2	2	1382.68	1382.64	Cytochrome c oxidase subunit 6b	mitochondria	*m	Ac-AEDMETKIKNY	k		Bortez/Cont=	2	1.73333	1.6	Cont/Cont=	0.933333	1.06667	1.77778	=Avg Bort/Cont (1h, 50nM)
HEK293T	bortezomib 1h, 50nM	3	3	1384.81	1384.76	Nucleophosmin	nucleus	q	ASIEKGGSLPKVEA	k		Bortez/Cont=	>5	>5	>5	Cont/Cont=	nd	nd	>5	=Avg Bort/Cont (1h, 50nM)
HEK293T	bortezomib 1h, 50nM	2	2	1384.78	1384.79	Triosephosphate isomerase 1	cytoplasm	q	SLGELIGTLNAAKV	p		Bortez/Cont=	>5	>5	>5	Cont/Cont=	nd	nd	>5	=Avg Bort/Cont (1h, 50nM)
HEK293T	bortezomib 1h, 50nM	2	1	1396.79	1396.81	Nucleophosmin	nucleus	l	GGFEITPPVVLRL	k		Bortez/Cont=	1.41053	0.631579	0.631579	Cont/Cont=	0.947368	1.05263	0.891228	=Avg Bort/Cont (1h, 50nM)
HEK293T	bortezomib 1h, 50nM	2	1	1399.73	1399.75	40S Ribosomal protein S28	cytoplasm	*	Ac-MDTSRVQPIKLA	r		Bortez/Cont=	2.76	1.8	1.4	Cont/Cont=	0.8	1.2	1.98667	=Avg Bort/Cont (1h, 50nM)
HEK293T	bortezomib 1h, 50nM	2	2	1400.76	1400.77	Eukaryotic translation elongation factor 1 beta	cytoplasm	*m	GFGDLKSPAGLQVL	n		Bortez/Cont=	0.618705	0.431655	0.330935	Cont/Cont=	0.920863	1.07914	0.460432	=Avg Bort/Cont (1h, 50nM)
HEK293T	bortezomib 1h, 50nM	3	2	1406.76	1406.73	Histidine triad nucleotide-binding protein 1	cytoplasm	c	AADLGLNKGYRMV	v		Bortez/Cont=	3.73333	2.53333	1.86667	Cont/Cont=	0.933333	1.06667	2.71111	=Avg Bort/Cont (1h, 50nM)
HEK293T	bortezomib 1h, 50nM	3	2	1429.75	1429.72	Heat shock 10kDa protein 1 (chaperonin 10)	mitochondria	v	VLDDKDYFLFR	d		Bortez/Cont=	>5	>5	>5	Cont/Cont=	nd	nd	>5	=Avg Bort/Cont (1h, 50nM)
HEK293T	bortezomib 1h, 50nM	2	1	1433.82	1433.84	Enhancer of rudimentary homolog	nucleus	*m	Ac-SHTILLVQPTKR	p		Bortez/Cont=	4.24242	3.0303	2.84848	Cont/Cont=	0.909091	1.09091	3.37374	=Avg Bort/Cont (1h, 50nM)
HEK293T	bortezomib 1h, 50nM	2	1	1443.76	1443.78	Small nuclear ribonucleoprotein G-like protein	nucleus	r	GNSIIMLEALERV	*		Bortez/Cont=	3.6	2.25	2.1	Cont/Cont=	1.25	0.75	2.65	=Avg Bort/Cont (1h, 50nM)
HEK293T	bortezomib 1h, 50nM	2	1	1445.71	1445.74	Macrophage migration inhibitory factor	cytoplasm	s	VPDGFLSELTQQL	a		Bortez/Cont=	>5	>5	>5	Cont/Cont=	nd	nd	>5	=Avg Bort/Cont (1h, 50nM)
HEK293T	bortezomib 1h, 50nM	3	3	1462.82	1462.75	Eukaryotic translation initiation factor 5A	cytoplasm	a	MTEEAAVAIKAMAK	*		Bortez/Cont=	0.961538	0.576923	0.307692	Cont/Cont=	0.961538	1.03846	0.615385	=Avg Bort/Cont (1h, 50nM)
HEK293T	bortezomib 1h, 50nM	2	1	1473.75	1473.75	Peptidylprolyl isomerase A	cytoplasm	f	DIAVDGEPLGRVSF	e		Bortez/Cont=	0.869565	0.652174	0.652174	Cont/Cont=	1.04348	0.956522	0.724638	=Avg Bort/Cont (1h, 50nM)
HEK293T	bortezomib 1h, 50nM	3	3	1474.77	1474.8	Heat shock 10kDa protein 1 (chaperonin 10)	mitochondria	v	GDKVLLPEYGGTKV	v		Bortez/Cont=	>5	>5	>5	Cont/Cont=	nd	nd	>5	=Avg Bort/Cont (1h, 50nM)
HEK293T	bortezomib 1h, 50nM	2	2	1478.82	1478.81	Prohibitin	mitochondria	*m	Ac-AAKVFESIGKFGLA	l		Bortez/Cont=	0.885496	1.0687	1.12977	Cont/Cont=	0.900763	1.09924	1.02799	=Avg Bort/Cont (1h, 50nM)
HEK293T	bortezomib 1h, 50nM	3	3	1480.96	1480.9	Acidic nuclear phosphoprotein pp32	nucleus	v	GLTSIANLPKLNKL	k		Bortez/Cont=	2.73684	1.52632	1.05263	Cont/Cont=	0.842105	1.15789	1.77193	=Avg Bort/Cont (1h, 50nM)
HEK293T	bortezomib 1h, 50nM	3	3	1485.8	1485.78	Heat shock 10kDa protein 1 (chaperonin 10)	mitochondria	v	GSGSKGKGGEIQPVSV	k		Bortez/Cont=	9.85714	6.78571	4.57143	Cont/Cont=	0.785714	1.21429	>5	=Avg Bort/Cont (1h, 50nM)
HEK293T	bortezomib 1h, 50nM	2	3	1485.88	1485.78	Heat shock 10kDa protein 1 (chaperonin 10)	mitochondria	v	GSGSKGKGGEIQPVSV	k		Bortez/Cont=	7.5	4.5	3	Cont/Cont=	1	1	>5	=Avg Bort/Cont (1h, 50nM)
HEK293T	bortezomib 1h, 50nM	3	1	1502.81	1502.86	Heat shock 10kDa protein 1 (chaperonin 10)	mitochondria	k	FLPLFDRVLVER	s		Bortez/Cont=	>5	>5	>5	Cont/Cont=	nd	nd	>5	=Avg Bort/Cont (1h, 50nM)
HEK293T	bortezomib 1h, 50nM	4	4	1513.92	1513.85	60S acidic ribosomal protein P2	cytoplasm	a	LGGNSSPSAKDIKKI	l		Bortez/Cont=	>5	>5	po	Cont/Cont=	po	nd	>5	=Avg Bort/Cont (1h, 50nM)
HEK293T	bortezomib 1h, 50nM	1	1	1524.68	1524.75	RNA binding motif protein 3	nucleus	*m	Ac-SSEEGKLFVGGLNF	n		Bortez/Cont=	0.631579	0.350877	0.561404	Cont/Cont=	0.77193	1.22807	0.51462	=Avg Bort/Cont (1h, 50nM)
HEK293T	bortezomib 1h, 50nM	2	1	1524.76	1524.75	RNA binding motif protein 3	nucleus	*m	Ac-SSEEGKLFVGGLNF	n		Bortez/Cont=	0.285714	0.530612	po	Cont/Cont=	0.693878	1.30612	0.408163	=Avg Bort/Cont (1h, 50nM)
HEK293T	bortezomib 1h, 50nM	2	2	1524.81	1524.86	Peroxiredoxin 5	mitochondria	m	APIKVGDAIPAVEVF	e		Bortez/Cont=	0.204082	0.176871	0.136054	Cont/Cont=	0.952381	1.04762	0.172336	=Avg Bort/Cont (1h, 50nM)
HEK293T	bortezomib 1h, 50nM	2	1	1529.72	1529.72	Protein SET (Phosphatase 2A inhibitor I2PP2A)	cytoplasm	a	LLGEEDEEALHYL	t		Bortez/Cont=	>5	>5	>5	Cont/Cont=	nd	nd	>5	=Avg Bort/Cont (1h, 50nM)
HEK293T	bortezomib 1h, 50nM	2	1	1550.76	1550.82	Heat shock 10kDa protein 1 (chaperonin 10)	mitochondria	*m	Ac-AGQAFRKFLPLFD	r		Bortez/Cont=	3.33	2.86	3.29	Cont/Cont=	0.94	1.06	3.16	=Avg Bort/Cont (1h, 50nM)
HEK293T	bortezomib 1h, 50nM	2	1	1555.83	1555.85	40S Ribosomal protein S28	cytoplasm	*	Ac-MDTSRVQPIKLAR	v		Bortez/Cont=	2.33333	1.33333	1.66667	Cont/Cont=	1	1	1.77778	=Avg Bort/Cont (1h, 50nM)
HEK293T	bortezomib 1h, 50nM	4	3	1558.93	1558.85	Peptidylprolyl isomerase A	cytoplasm	f	ADKVPKTAENFRAL	s		Bortez/Cont=	1.42222	0.888889	0.755556	Cont/Cont=	0.977778	1.02222	1.02222	=Avg Bort/Cont (1h, 50nM)
HEK293T	bortezomib 1h, 50nM	3	3	1558.93	1558.85	Peptidylprolyl isomerase A	cytoplasm	f	ADKVPKTAENFRAL	s		Bortez/Cont=	1.46667	0.844444	0.577778	Cont/Cont=	0.888889	1.11111	0.962963	=Avg Bort/Cont (1h, 50nM)
HEK293T	bortezomib 1h, 50nM	3	3	1584.86	1584.85	Heat shock 10kDa protein 1 (chaperonin 10)	mitochondria	a	VGSGSKGKGGEIQPVSV	k		Bortez/Cont=	>5	>5	>5	Cont/Cont=	nd	nd	>5	=Avg Bort/Cont (1h, 50nM)
HEK293T	bortezomib 1h, 50nM	3	3	1584.89	1584.85	Heat shock 10kDa protein 1 (chaperonin 10)	mitochondria	a	VGSGSKGKGGEIQPVSV	k		Bortez/Cont=	10.1481	6.37037	4.07407	Cont/Cont=	0.962963	1.03704	>5	=Avg Bort/Cont (1h, 50nM)
HEK293T	bortezomib 1h, 50nM	4	4	1584.94	1584.88	60S acidic ribosomal protein P2	cytoplasm	a	ALGGNSSPSAKDIKKI	l		Bortez/Cont=	>5	>5	>5	Cont/Cont=	nd	nd	>5	=Avg Bort/Cont (1h, 50nM)
HEK293T	bortezomib 1h, 50nM	2	2	1607.78	1607.76	Acidic nuclear phosphoprotein pp32	nucleus	n	EGKLEGLTDEFEEL	e		Bortez/Cont=	>5	>5	>5	Cont/Cont=	nd	nd	>5	=Avg Bort/Cont (1h, 50nM)
HEK293T	bortezomib 1h, 50nM	3	3	1611.85	1611.78	Cytochrome c oxidase subunit 6b	mitochondria	*m	Ac-AEDMETKIKNYKT	a		Bortez/Cont=	0.695652	0.623188	0.57971	Cont/Cont=	0.913043	1.08696	0.63285	=Avg Bort/Cont (1h, 50nM)
HEK293T	bortezomib 1h, 50nM	2	1	1616.75	1616.8	Macrophage migration inhibitory factor	cytoplasm	v	PDGFLSELTQQLAQA	t		Bortez/Cont=	>5	>5	>5	Cont/Cont=	nd	nd	>5	=Avg Bort/Cont (1h, 50nM)
HEK293T	bortezomib 1h, 50nM	3	3	1620.85	1620.82	Eukaryotic translation initiation factor 5A	cytoplasm	l	SAMTEEAAVAIKAMAK	*		Bortez/Cont=	0.820896	0.61194	0.41791	Cont/Cont=	1.02985	0.970149	0.616915	=Avg Bort/Cont (1h, 50nM)
HEK293T	bortezomib 1h, 50nM	2	2	1629.86	1629.84	Eukaryotic translation elongation factor 1 beta	cytoplasm	*m	GFGDLKSPAGLQVLND	y		Bortez/Cont=	1.19658	0.854701	0.666667	Cont/Cont=	1.02564	0.974359	0.905983	=Avg Bort/Cont (1h, 50nM)
HEK293T	bortezomib 1h, 50nM	2	1	1634.8	1634.83	Peptidylprolyl isomerase A	cytoplasm	i	AVDGEPLGRVSFELF	a		Bortez/Cont=	0.6	0.454545	0.363636	Cont/Cont=	0.909091	1.09091	0.472727	=Avg Bort/Cont (1h, 50nM)
HEK293T	bortezomib 1h, 50nM	3	3	1654.9	1654.91	Heat shock 10kDa protein 1 (chaperonin 10)	mitochondria	k	GGIMLPEKSQGKVLQA	t		Bortez/Cont=	>5	>5	>5	Cont/Cont=	nd	nd	>5	=Avg Bort/Cont (1h, 50nM)
HEK293T	bortezomib 1h, 50nM	2	3	1654.97	1654.91	Heat shock 10kDa protein 1 (chaperonin 10)	mitochondria	k	GGIMLPEKSQGKVLQA	t		Bortez/Cont=	>5	>5	>5	Cont/Cont=	nd	nd	>5	=Avg Bort/Cont (1h, 50nM)
HEK293T	bortezomib 1h, 50nM	2	3	1655.93	1655.88	Heat shock 10kDa protein 1 (chaperonin 10)	mitochondria	v	AVGSGSKGKGGEIQPVSV	k		Bortez/Cont=	2.53333	2.33333	2	Cont/Cont=	0.833333	1.16667	2.28889	=Avg Bort/Cont (1h, 50nM)
HEK293T	bortezomib 1h, 50nM	3	3	1655.96	1655.88	Heat shock 10kDa protein 1 (chaperonin 10)	mitochondria	v	AVGSGSKGKGGEIQPVSV	k		Bortez/Cont=	4.75862	2.31034	1.37931	Cont/Cont=	1.06897	0.931034	2.81609	=Avg Bort/Cont (1h, 50nM)
HEK293T	bortezomib 1h, 50nM	4	4	1656.01	1655.92	60S acidic ribosomal protein P2	cytoplasm	l	AALGGNSSPSAKDIKKI	l		Bortez/Cont=	>5	>5	>5	Cont/Cont=	nd	nd	>5	=Avg Bort/Cont (1h, 50nM)
HEK293T	bortezomib 1h, 50nM	2	2	1662.91	1662.93	Prohibitin	mitochondria	*m	Ac-AAKVFESIGKFGLALA	v		Bortez/Cont=	0.811594	0.797101	1.02899	Cont/Cont=	0.913043	1.08696	0.879227	=Avg Bort/Cont (1h, 50nM)
HEK293T	bortezomib 1h, 50nM	2	2	1667.94	1667.91	Phosphatidylethanolamine-binding protein 1	cytoplasm	y	AGAAVDELGKVLTPTQV	k		Bortez/Cont=	0.666667	0.4	0.306667	Cont/Cont=	0.973333	1.02667	0.457778	=Avg Bort/Cont (1h, 50nM)
HEK293T	bortezomib 1h, 50nM	2	1	1672.84	1672.9	D4, zinc and double PHD fingers family 2	cytoplasm	*m	Ac-AAVVENVVKLLGEQY	y		Bortez/Cont=	0.390625	0.359375	0.390625	Cont/Cont=	1.01562	0.984375	0.380208	=Avg Bort/Cont (1h, 50nM)
HEK293T	bortezomib 1h, 50nM	2	2	1685.93	1685.92	Prefoldin subunit 1	cytoplasm	*m	Ac-AAPVDLELKKAFTEL	q		Bortez/Cont=	0.328125	0.296875	0.265625	Cont/Cont=	0.828125	1.17188	0.296875	=Avg Bort/Cont (1h, 50nM)
HEK293T	bortezomib 1h, 50nM	3	1	1688.84	1688.88	Histone H2B	nucleus	f	VNDIFERIAGEASRL	p		Bortez/Cont=	1.825	1.325	0.825	Cont/Cont=	1.125	0.875	1.325	=Avg Bort/Cont (1h, 50nM)
HEK293T	bortezomib 1h, 50nM	3	1	1706.88	1706.93	Heat shock 10kDa protein 1 (chaperonin 10)	mitochondria	*m	Ac-AGQAFRKFLPLFDR	v		Bortez/Cont=	3.125	2.375	1.875	Cont/Cont=	0.833333	1.16667	2.45833	=Avg Bort/Cont (1h, 50nM)
HEK293T	bortezomib 1h, 50nM	2	1	1712.76	1712.79	Histidine triad nucleotide-binding protein 1	cytoplasm	v	AEDDDESLLGHLMIVG	k		Bortez/Cont=	1.2	0.761905	0.666667	Cont/Cont=	1.04762	0.952381	0.87619	=Avg Bort/Cont (1h, 50nM)
HEK293T	bortezomib 1h, 50nM	4	4	1713.06	1712.98	Triosephosphate isomerase 1	cytoplasm	t	KVIADNVKDWSKVVL	a		Bortez/Cont=	0.272374	0.225681	0.163424	Cont/Cont=	0.964981	1.03502	0.220493	=Avg Bort/Cont (1h, 50nM)
HEK293T	bortezomib 1h, 50nM	3	4	1713.08	1712.98	Triosephosphate isomerase 1	cytoplasm	t	KVIADNVKDWSKVVL	a		Bortez/Cont=	0.36	0.2	0.16	Cont/Cont=	1	1	0.24	=Avg Bort/Cont (1h, 50nM)
HEK293T	bortezomib 1h, 50nM	2	1	1728.75	1728.77	MAPK-interacting and spindle-stabilizing protein-like	cytoplasm	v	PSGPSGAPPMPGGPHSYH	*		Bortez/Cont=	3.33333	2	1.24444	Cont/Cont=	1.33333	0.666667	2.19259	=Avg Bort/Cont (1h, 50nM)
HEK293T	bortezomib 1h, 50nM	3	1	1728.77	1728.77	MAPK-interacting and spindle-stabilizing protein-like	cytoplasm	v	PSGPSGAPPMPGGPHSYH	*		Bortez/Cont=	5.12	2.52	1.6	Cont/Cont=	1.4	0.6	3.08	=Avg Bort/Cont (1h, 50nM)
HEK293T	bortezomib 1h, 50nM	3	2	1757.91	1757.88	60S acidic ribosomal protein P2	cytoplasm	i	LDSVGIEADDDRLNKV	i		Bortez/Cont=	>5	>5	>5	Cont/Cont=	nd	nd	>5	=Avg Bort/Cont (1h, 50nM)
HEK293T	bortezomib 1h, 50nM	2	1	1762.78	1762.84	Complement component 1 Q subcomponent-binding protein, mitochondrial	mitochondria	l	ADRGVDNTFADELVEL	s		Bortez/Cont=	>5	>5	>5	Cont/Cont=	nd	nd	>5	=Avg Bort/Cont (1h, 50nM)
HEK293T	bortezomib 1h, 50nM	3	3	1763.92	1763.92	Peptidylprolyl isomerase A	cytoplasm	f	ELFADKVPKTAENFR	a		Bortez/Cont=	1.85185	1.55556	1.48148	Cont/Cont=	1.03704	0.962963	1.62963	=Avg Bort/Cont (1h, 50nM)
HEK293T	bortezomib 1h, 50nM	3	1	1784.84	1784.87	Acyl-CoA-binding protein (Diazepam binding inhibitor)	cytoplasm	*m	Ac-SQAEFEKAAEEVRHL	k		Bortez/Cont=	>5	>5	>5	Cont/Cont=	nd	nd	>5	=Avg Bort/Cont (1h, 50nM)
HEK293T	bortezomib 1h, 50nM	3	2	1785.91	1785.91	60S acidic ribosomal protein P2	cytoplasm	v	GIEADDDRLNKVISEL	n		Bortez/Cont=	4.2	2.6	1.8	Cont/Cont=	0.9	1.1	2.86667	=Avg Bort/Cont (1h, 50nM)
HEK293T	bortezomib 1h, 50nM	3	1	1786.86	1786.87	Protein SET (Phosphatase 2A inhibitor I2PP2A)	cytoplasm	a	LLGEEDEEALHYLTR	v		Bortez/Cont=	4.75	2.8125	1.75	Cont/Cont=	0.9375	1.0625	3.10417	=Avg Bort/Cont (1h, 50nM)
HEK293T	bortezomib 1h, 50nM	3	1	1805.94	1805.99	Heat shock 10kDa protein 1 (chaperonin 10)	mitochondria	*m	Ac-AGQAFRKFLPLFDRV	l		Bortez/Cont=	0.685185	0.537037	0.592593	Cont/Cont=	0.851852	1.14815	0.604938	=Avg Bort/Cont (1h, 50nM)
HEK293T	bortezomib 1h, 50nM	2	2	1814.93	1814.97	60S acidic ribosomal protein P1	cytoplasm	a	AGVNVEPFWPGLFAKAL	a		Bortez/Cont=	0.909091	0.6	0.472727	Cont/Cont=	1	1	0.660606	=Avg Bort/Cont (1h, 50nM)
HEK293T	bortezomib 1h, 50nM	3	1	1855.98	1856.01	40S Ribosomal protein S28	cytoplasm	e	GDVLTLLESEREARRL	r		Bortez/Cont=	>5	>5	>5	Cont/Cont=	nd	nd	>5	=Avg Bort/Cont (1h, 50nM)
HEK293T	bortezomib 1h, 50nM	4	1	1856	1856.01	40S Ribosomal protein S28	cytoplasm	e	GDVLTLLESEREARRL	r		Bortez/Cont=	3.83333	3.08333	2.27778	Cont/Cont=	1.05556	0.944444	3.06481	=Avg Bort/Cont (1h, 50nM)
HEK293T	bortezomib 1h, 50nM	2	1	1856.9	1856.96	Macrophage migration inhibitory factor	cytoplasm	v	PRASVPDGFLSELTQQL	a		Bortez/Cont=	2.36364	1.45455	1.45455	Cont/Cont=	1.09091	0.909091	1.75758	=Avg Bort/Cont (1h, 50nM)
HEK293T	bortezomib 1h, 50nM	3	1	1857.89	1857.91	Protein SET (Phosphatase 2A inhibitor I2PP2A)	cytoplasm	s	ALLGEEDEEALHYLTR	v		Bortez/Cont=	>5	>5	>5	Cont/Cont=	nd	nd	>5	=Avg Bort/Cont (1h, 50nM)
HEK293T	bortezomib 1h, 50nM	2	1	1882.85	1882.92	Nuclear transport factor 2	cytoplasm	*m	Ac-GDKPIWEQIGSSFIQH	y		Bortez/Cont=	3.25	2.5	2.5	Cont/Cont=	1	1	2.75	=Avg Bort/Cont (1h, 50nM)
HEK293T	bortezomib 1h, 50nM	3	2	1899.95	1899.94	Peptidylprolyl isomerase A	cytoplasm	f	EDENFILKHTGPGILSM	a		Bortez/Cont=	0.49505	0.29703	0.217822	Cont/Cont=	1.0099	0.990099	0.336634	=Avg Bort/Cont (1h, 50nM)
HEK293T	bortezomib 1h, 50nM	2	2	1905.95	1905.98	Eukaryotic translation elongation factor 1 beta	cytoplasm	*m	GFGDLKSPAGLQVLNDYL	a		Bortez/Cont=	0.434783	0.347826	0.26087	Cont/Cont=	1.02899	0.971014	0.347826	=Avg Bort/Cont (1h, 50nM)
HEK293T	bortezomib 1h, 50nM	3	2	1905.97	1905.98	Eukaryotic translation elongation factor 1 beta	cytoplasm	*m	GFGDLKSPAGLQVLNDYL	a		Bortez/Cont=	0.538462	0.384615	0.307692	Cont/Cont=	1	1	0.410256	=Avg Bort/Cont (1h, 50nM)
HEK293T	bortezomib 1h, 50nM	2	1	1922.9	1922.92	40S Ribosomal protein S21	cytoplasm	*	Ac-MQNDAGEFVDLYVPRK	c		Bortez/Cont=	1.625	0.875	0.625	Cont/Cont=	0.875	1.125	1.04167	=Avg Bort/Cont (1h, 50nM)
HEK293T	bortezomib 1h, 50nM	3	3	1955.11	1955.07	Heat shock 10kDa protein 1 (chaperonin 10)	mitochondria	a	TVVAVGSGSKGKGGEIQPVSV	k		Bortez/Cont=	3.20833	1.75	1.25	Cont/Cont=	0.958333	1.04167	2.06944	=Avg Bort/Cont (1h, 50nM)
HEK293T	bortezomib 1h, 50nM	3	3	1968.99	1968.95	Phosphatidylethanolamine-binding protein 1	cytoplasm	a	EWDDYVPKLYEQLSGK	*		Bortez/Cont=	0.538462	0.4	0.353846	Cont/Cont=	1.15385	0.846154	0.430769	=Avg Bort/Cont (1h, 50nM)
HEK293T	bortezomib 1h, 50nM	2	2	1996.89	1996.95	Acidic nuclear phosphoprotein pp32	nucleus	n	EGKLEGLTDEFEELEFL	s		Bortez/Cont=	>5	>5	>5	Cont/Cont=	nd	nd	>5	=Avg Bort/Cont (1h, 50nM)
HEK293T	bortezomib 1h, 50nM	3	1	2009.96	2009.98	Hematological and neurological expressed 1 protein	nucleus	*m	Ac-TTTTTFKGVDPNSRNSSR	d		Bortez/Cont=	3.57143	2.28571	2.38095	Cont/Cont=	0.952381	1.04762	2.74603	=Avg Bort/Cont (1h, 50nM)
HEK293T	bortezomib 1h, 50nM	3	1	2012.06	2012.11	40S Ribosomal protein S28	cytoplasm	e	GDVLTLLESEREARRLR	*		Bortez/Cont=	7.5	4.5	3.5	Cont/Cont=	1	1	>5	=Avg Bort/Cont (1h, 50nM)
HEK293T	bortezomib 1h, 50nM	4	1	2012.06	2012.11	40S Ribosomal protein S28	cytoplasm	e	GDVLTLLESEREARRLR	*		Bortez/Cont=	2.36522	2.01739	1.33913	Cont/Cont=	1.04348	0.956522	1.90725	=Avg Bort/Cont (1h, 50nM)
HEK293T	bortezomib 1h, 50nM	3	1	2015.98	2016.01	Nucleophosmin	nucleus	m	TDQEAIQDLWQWRKSL	*		Bortez/Cont=	3.75	2.25	2.15	Cont/Cont=	1	1	2.71667	=Avg Bort/Cont (1h, 50nM)
HEK293T	bortezomib 1h, 50nM	2	1	2070.98	2071.06	Proteasome maturation protein	nucleus	*	Ac-MNARGLGSELKDSIPVTEL	s		Bortez/Cont=	1.26316	0.842105	0.842105	Cont/Cont=	1.05263	0.947368	0.982456	=Avg Bort/Cont (1h, 50nM)
HEK293T	bortezomib 1h, 50nM	2	2	2087	2087.04	60S acidic ribosomal protein P2	cytoplasm	i	LDSVGIEADDDRLNKVISE	l		Bortez/Cont=	>5	>5	>5	Cont/Cont=	nd	nd	>5	=Avg Bort/Cont (1h, 50nM)
HEK293T	bortezomib 1h, 50nM	3	2	2087.02	2087.04	60S acidic ribosomal protein P2	cytoplasm	i	LDSVGIEADDDRLNKVISE	l		Bortez/Cont=	>5	>5	>5	Cont/Cont=	nd	nd	>5	=Avg Bort/Cont (1h, 50nM)
HEK293T	bortezomib 1h, 50nM	2	1	2110.07	2110.12	Methylosome subunit pICln (AltName: Chloride channel, nucleotide sensitive 1A)	nucleus	*m	Ac-SFLKSFPPPGPAEGLLRQQ	p		Bortez/Cont=	2.84615	1.73077	1.73077	Cont/Cont=	1.03846	0.961538	2.10256	=Avg Bort/Cont (1h, 50nM)
HEK293T	bortezomib 1h, 50nM	3	2	2131.14	2131.14	Macrophage migration inhibitory factor	cytoplasm	l	AQATGKPPQYIAVHVVPDQL	m		Bortez/Cont=	2.37931	1.48276	1.2069	Cont/Cont=	1.03448	0.965517	1.68966	=Avg Bort/Cont (1h, 50nM)
HEK293T	bortezomib 1h, 50nM	2	2	2131.15	2131.14	Macrophage migration inhibitory factor	cytoplasm	l	AQATGKPPQYIAVHVVPDQL	m		Bortez/Cont=	1.9403	1.58209	1.04478	Cont/Cont=	1.04478	0.955224	1.52239	=Avg Bort/Cont (1h, 50nM)
HEK293T	bortezomib 1h, 50nM	3	1	2137.1	2137.16	Enhancer of rudimentary homolog	nucleus	*m	Ac-SHTILLVQPTKRPEGRTY	a		Bortez/Cont=	2.27692	1.38462	1.38462	Cont/Cont=	1.07692	0.923077	1.68205	=Avg Bort/Cont (1h, 50nM)
HEK293T	bortezomib 1h, 50nM	2	1	2137.11	2137.16	Enhancer of rudimentary homolog	nucleus	*m	Ac-SHTILLVQPTKRPEGRTY	a		Bortez/Cont=	1.86667	1.2	1.6	Cont/Cont=	0.933333	1.06667	1.55556	=Avg Bort/Cont (1h, 50nM)
HEK293T	bortezomib 1h, 50nM	2	1	2143.95	2144.06	Septin 9	cytoplasm	*m	Ac-SDPAVNAQLDGIISDFEALK	r		Bortez/Cont=	1.2	1	1	Cont/Cont=	1	1	1.06667	=Avg Bort/Cont (1h, 50nM)
HEK293T	bortezomib 1h, 50nM	3	1	2147.08	2147.19	Heat shock 10kDa protein 1 (chaperonin 10)	mitochondria	*m	Ac-AGQAFRKFLPLFDRVLVE	r		Bortez/Cont=	1.46667	1.06667	1.33333	Cont/Cont=	0.8	1.2	1.28889	=Avg Bort/Cont (1h, 50nM)
HEK293T	bortezomib 1h, 50nM	2	2	2150.97	2151.03	Phosphatidylethanolamine-binding protein 1	cytoplasm	y	pyroE-AEWDDYVPKLYEQLSGK	*		Bortez/Cont=	0.714286	0.571429	0.714286	Cont/Cont=	1.07143	0.928571	0.666667	=Avg Bort/Cont (1h, 50nM)
HEK293T	bortezomib 1h, 50nM	3	2	2180.12	2180.17	Cytochrome c oxidase subunit 5a	mitochondria	l	RPTLNELGISTPEELGLDKV	*		Bortez/Cont=	0.970588	0.676471	0.514706	Cont/Cont=	0.985294	1.01471	0.720588	=Avg Bort/Cont (1h, 50nM)
HEK293T	bortezomib 1h, 50nM	2	2	2184.99	2185.03	Acidic nuclear phosphoprotein pp32	nucleus	n	EGKLEGLTDEFEELEFLST	i		Bortez/Cont=	>5	>5	>5	Cont/Cont=	nd	nd	>5	=Avg Bort/Cont (1h, 50nM)
HEK293T	bortezomib 1h, 50nM	3	2	2200.08	2200.12	60S acidic ribosomal protein P2	cytoplasm	i	LDSVGIEADDDRLNKVISEL	n		Bortez/Cont=	>5	>5	>5	Cont/Cont=	nd	nd	>5	=Avg Bort/Cont (1h, 50nM)
HEK293T	bortezomib 1h, 50nM	4	4	2203.3	2203.22	60S acidic ribosomal protein P2	cytoplasm	v	ASYLLAALGGNSSPSAKDIKKI	l		Bortez/Cont=	>5	>5	>5	Cont/Cont=	nd	nd	>5	=Avg Bort/Cont (1h, 50nM)
HEK293T	bortezomib 1h, 50nM	2	1	2213.01	2213.05	MAPK-interacting and spindle-stabilizing protein-like	cytoplasm	*m	Ac-SDEFSLADALPEHSPAKTSAV	s		Bortez/Cont=	0.571429	1.71429	1.57143	Cont/Cont=	1	1	1.28571	=Avg Bort/Cont (1h, 50nM)
HEK293T	bortezomib 1h, 50nM	2	1	2216	2216.08	Splicing factor, arginine/serine-rich 2	nucleus	*m	Ac-SYGRPPPDVEGMTSLKVDNL	t		Bortez/Cont=	0.588235	0.490196	0.45098	Cont/Cont=	1.01961	0.980392	0.509804	=Avg Bort/Cont (1h, 50nM)
HEK293T	bortezomib 1h, 50nM	4	2	2229.19	2229.15	FK506 Binding Protein	cytoplasm	m	GVQVETISPGDGRTFPKRGQT	c		Bortez/Cont=	<0.2	<0.2	<0.2	Cont/Cont=	1.13089	0.86911	<0.2	=Avg Bort/Cont (1h, 50nM)
HEK293T	bortezomib 1h, 50nM	3	3	2234.2	2234.15	40S Ribosomal protein S21	cytoplasm	m	GESDDSILRLAKADGIVSKNF	*		Bortez/Cont=	1.85	1.325	1	Cont/Cont=	1	1	1.39167	=Avg Bort/Cont (1h, 50nM)
HEK293T	bortezomib 1h, 50nM	4	3	2234.2	2234.15	40S Ribosomal protein S21	cytoplasm	m	GESDDSILRLAKADGIVSKNF	*		Bortez/Cont=	1.52941	1.34118	1.01176	Cont/Cont=	0.823529	1.17647	1.29412	=Avg Bort/Cont (1h, 50nM)
HEK293T	bortezomib 1h, 50nM	3	1	2269.04	2269.12	Protein SET (Phosphatase 2A inhibitor I2PP2A)	cytoplasm	h	PQVSALLGEEDEEALHYLTR	v		Bortez/Cont=	>5	>5	>5	Cont/Cont=	nd	nd	>5	=Avg Bort/Cont (1h, 50nM)
HEK293T	bortezomib 1h, 50nM	3	2	2293.19	2293.25	Cytochrome c oxidase subunit 5a	mitochondria	e	LRPTLNELGISTPEELGLDKV	*		Bortez/Cont=	4.48276	3.10345	2.48276	Cont/Cont=	0.965517	1.03448	3.35632	=Avg Bort/Cont (1h, 50nM)
HEK293T	bortezomib 1h, 50nM	3	2	2302.19	2302.2	Uncharacterized protein C14orf142	unknown	*	Ac-MELLGEYVGQEGKPQKLRVS	c		Bortez/Cont=	1.30526	1.05263	0.884211	Cont/Cont=	0.736842	1.26316	1.0807	=Avg Bort/Cont (1h, 50nM)
HEK293T	bortezomib 1h, 50nM	5	2	2309.31	2309.34	40S Ribosomal protein S28	cytoplasm	*	Ac-MDTSRVQPIKLARVTKVLGR	t		Bortez/Cont=	1.31217	1.22751	1.10053	Cont/Cont=	0.899471	1.10053	1.2134	=Avg Bort/Cont (1h, 50nM)
HEK293T	bortezomib 1h, 50nM	4	2	2309.34	2309.34	40S Ribosomal protein S28	cytoplasm	*	Ac-MDTSRVQPIKLARVTKVLGR	t		Bortez/Cont=	1.42268	1.13402	0.927835	Cont/Cont=	0.907216	1.09278	1.16151	=Avg Bort/Cont (1h, 50nM)
HEK293T	bortezomib 1h, 50nM	3	2	2333.2	2333.22	Macrophage migration inhibitory factor	cytoplasm	l	AQATGKPPQYIAVHVVPDQLMA	f		Bortez/Cont=	1.94444	1.47222	1.05556	Cont/Cont=	0.972222	1.02778	1.49074	=Avg Bort/Cont (1h, 50nM)
HEK293T	bortezomib 1h, 50nM	3	1	2357.04	2357.18	40S ribosomal protein S12	cytoplasm	*m	Ac-AEEGIAAGGVMDVNTALQEVLKT	a		Bortez/Cont=	0.842105	0.631579	0.842105	Cont/Cont=	1.05263	0.947368	0.77193	=Avg Bort/Cont (1h, 50nM)
HEK293T	bortezomib 1h, 50nM	2	1	2357.07	2357.18	40S ribosomal protein S12	cytoplasm	*m	Ac-AEEGIAAGGVMDVNTALQEVLKT	a		Bortez/Cont=	0.761905	0.761905	0.761905	Cont/Cont=	0.952381	1.04762	0.761905	=Avg Bort/Cont (1h, 50nM)
HEK293T	bortezomib 1h, 50nM	4	3	2365.23	2365.19	40S Ribosomal protein S21	cytoplasm	r	MGESDDSILRLAKADGIVSKNF	*		Bortez/Cont=	1.15789	0.859649	0.614035	Cont/Cont=	0.982456	1.01754	0.877193	=Avg Bort/Cont (1h, 50nM)
HEK293T	bortezomib 1h, 50nM	3	1	2384.14	2384.23	Macrophage migration inhibitory factor	cytoplasm	i	VNTNVPRASVPDGFLSELTQQL	a		Bortez/Cont=	2.27027	2.05405	1.13514	Cont/Cont=	1.02703	0.972973	1.81982	=Avg Bort/Cont (1h, 50nM)
HEK293T	bortezomib 1h, 50nM	4	3	2406.19	2406.17	Heat shock 10kDa protein 1 (chaperonin 10)	mitochondria	v	LDDKDYFLFRDGDILGKYVD	*		Bortez/Cont=	>5	>5	>5	Cont/Cont=	nd	nd	>5	=Avg Bort/Cont (1h, 50nM)
HEK293T	bortezomib 1h, 50nM	3	2	2469.33	2469.33	Far upstream element-binding protein 2	nucleus	c	GLVIGRGGENVKAINQQTGAFVEI	s		Bortez/Cont=	<0.2	<0.2	<0.2	Cont/Cont=	0.899083	1.10092	<0.2	=Avg Bort/Cont (1h, 50nM)
HEK293T	bortezomib 1h, 50nM	2	1	2480.15	2480.19	Splicing factor, arginine/serine-rich 2	nucleus	*m	Ac-SYGRPPPDVEGMTSLKVDNLTY	r		Bortez/Cont=	0.777778	0.666667	0.666667	Cont/Cont=	1.06667	0.933333	0.703704	=Avg Bort/Cont (1h, 50nM)
HEK293T	bortezomib 1h, 50nM	3	2	2480.25	2480.29	Macrophage migration inhibitory factor	cytoplasm	l	AQATGKPPQYIAVHVVPDQLMAF	g		Bortez/Cont=	1.30435	1.04348	0.869565	Cont/Cont=	1.04348	0.956522	1.07246	=Avg Bort/Cont (1h, 50nM)
HEK293T	bortezomib 1h, 50nM	4	3	2505.22	2505.24	Heat shock 10kDa protein 1 (chaperonin 10)	mitochondria	v	VLDDKDYFLFRDGDILGKYVD	*		Bortez/Cont=	2.5	1.70833	1.45833	Cont/Cont=	1.04167	0.958333	1.88889	=Avg Bort/Cont (1h, 50nM)
HEK293T	bortezomib 1h, 50nM	3	3	2505.23	2505.24	Heat shock 10kDa protein 1 (chaperonin 10)	mitochondria	v	VLDDKDYFLFRDGDILGKYVD	*		Bortez/Cont=	2.16667	1.5	1.33333	Cont/Cont=	1.16667	0.833333	1.66667	=Avg Bort/Cont (1h, 50nM)
HEK293T	bortezomib 1h, 50nM	4	3	2521.26	2521.3	40S Ribosomal protein S21	cytoplasm	r	RMGESDDSILRLAKADGIVSKNF	*		Bortez/Cont=	1.2	1.84	1.2	Cont/Cont=	0.64	1.36	1.41333	=Avg Bort/Cont (1h, 50nM)
HEK293T	bortezomib 1h, 50nM	5	3	2521.29	2521.3	40S Ribosomal protein S21	cytoplasm	r	RMGESDDSILRLAKADGIVSKNF	*		Bortez/Cont=	1.37931	1.24138	0.758621	Cont/Cont=	1.10345	0.896552	1.12644	=Avg Bort/Cont (1h, 50nM)
HEK293T	bortezomib 1h, 50nM	4	3	2595.45	2595.45	Histidine triad nucleotide-binding protein 1	cytoplasm	*m	ADEIAKAQVARPGGDTIFGKIIRK	e		Bortez/Cont=	3.42105	2.63158	2.68421	Cont/Cont=	0.947368	1.05263	2.91228	=Avg Bort/Cont (1h, 50nM)
HEK293T	bortezomib 1h, 50nM	3	1	2619.21	2619.29	Protein SET (Phosphatase 2A inhibitor I2PP2A)	cytoplasm	f	VNHPQVSALLGEEDEEALHYLTR	v		Bortez/Cont=	>5	>5	>5	Cont/Cont=	nd	nd	>5	=Avg Bort/Cont (1h, 50nM)
HEK293T	bortezomib 1h, 50nM	3	2	2711.33	2711.46	Protein DJ-1 ( Parkinson disease protein 7)	nucleus	*m	Ac-ASKRALVILAKGAEEMETVIPVDVM	r		Bortez/Cont=	0.183333	0.25	0.25	Cont/Cont=	0.916667	1.08333	0.227778	=Avg Bort/Cont (1h, 50nM)
HEK293T	bortezomib 1h, 50nM	4	3	2712.31	2712.36	Complement component 1 Q subcomponent-binding protein, mitochondrial	mitochondria	l	STALEHQEYITFLEDLKSFVKSQ	*		Bortez/Cont=	2.14286	0.714286	0.928571	Cont/Cont=	1.42857	0.571429	1.2619	=Avg Bort/Cont (1h, 50nM)
HEK293T	bortezomib 1h, 50nM	4	1	2718.29	2718.36	Protein SET (Phosphatase 2A inhibitor I2PP2A)	cytoplasm	f	VNHPQVSALLGEEDEEALHYLTRV	e		Bortez/Cont=	1.2381	0.952381	1.61905	Cont/Cont=	1.42857	0.571429	1.26984	=Avg Bort/Cont (1h, 50nM)
HEK293T	bortezomib 1h, 50nM	4	4	2820.45	2820.49	Thioredoxin	nucleus	*m	VKQIESKTAFQEALDAAGDKLVVVDF	s		Bortez/Cont=	1.79104	1.49254	1.04478	Cont/Cont=	0.955224	1.04478	1.44279	=Avg Bort/Cont (1h, 50nM)
HEK293T	bortezomib 1h, 50nM	2	1	2824.18	2824.28	RNA binding motif protein 3	nucleus	*m	Ac-SSEEGKLFVGGLNFNTDEQALEDHF	s		Bortez/Cont=	0.324324	0.540541	0.756757	Cont/Cont=	0.918919	1.08108	0.540541	=Avg Bort/Cont (1h, 50nM)
HEK293T	bortezomib 1h, 50nM	4	3	2837.56	2837.58	Histidine triad nucleotide-binding protein 1	cytoplasm	*m	Ac-ADEIAKAQVARPGGDTIFGKIIRKEI	p		Bortez/Cont=	2.19048	1.74603	1.80952	Cont/Cont=	0.793651	1.20635	1.91534	=Avg Bort/Cont (1h, 50nM)
HEK293T	bortezomib 1h, 50nM	5	3	2837.57	2837.58	Histidine triad nucleotide-binding protein 1	cytoplasm	*m	Ac-ADEIAKAQVARPGGDTIFGKIIRKEI	p		Bortez/Cont=	2.44898	2.2449	2.20408	Cont/Cont=	0.816327	1.18367	2.29932	=Avg Bort/Cont (1h, 50nM)
HEK293T	bortezomib 1h, 50nM	3	1	2872.33	2872.48	Macrophage migration inhibitory factor	cytoplasm	*m	PMFIVNTNVPRASVPDGFLSELTQQL	a		Bortez/Cont=	1.41333	1.06667	0.933333	Cont/Cont=	1.06667	0.933333	1.13778	=Avg Bort/Cont (1h, 50nM)
HEK293T	bortezomib 1h, 50nM	3	2	2882.33	2882.38	Acidic nuclear phosphoprotein pp32	nucleus	l	VLDNSRSNEGKLEGLTDEFEELEFL	s		Bortez/Cont=	1.22	0.9	0.72	Cont/Cont=	1	1	0.946667	=Avg Bort/Cont (1h, 50nM)
HEK293T	bortezomib 1h, 50nM	3	2	2914.43	2914.51	Triosephosphate isomerase 1	cytoplasm	l	ASQPDVDGFLVGGASLKPEFVDIINAKQ	*		Bortez/Cont=	1.01266	1.34177	1.51899	Cont/Cont=	0.734177	1.26582	1.29114	=Avg Bort/Cont (1h, 50nM)
HEK293T	bortezomib 1h, 50nM	4	3	2914.44	2914.51	Triosephosphate isomerase 1	cytoplasm	l	ASQPDVDGFLVGGASLKPEFVDIINAKQ	*		Bortez/Cont=	1.29032	0.967742	0.752688	Cont/Cont=	0.924731	1.07527	1.00358	=Avg Bort/Cont (1h, 50nM)
HEK293T	bortezomib 1h, 50nM	3	3	2914.45	2914.51	Triosephosphate isomerase 1	cytoplasm	l	ASQPDVDGFLVGGASLKPEFVDIINAKQ	*		Bortez/Cont=	1.14563	0.834951	0.679612	Cont/Cont=	0.873786	1.12621	0.886731	=Avg Bort/Cont (1h, 50nM)
HEK293T	bortezomib 1h, 50nM	3	2	3015.33	3015.41	Deoxyuridine 5'-triphosphate nucleotidohydrolase, mitochondrial	mitochondria	r	IFYPEIEEVQALDDTERGSGGFGSTGKN	*		Bortez/Cont=	>5	>5	>5	Cont/Cont=	nd	nd	>5	=Avg Bort/Cont (1h, 50nM)
HEK293T	bortezomib 1h, 50nM	5	3	3175.65	3175.67	Peptidylprolyl isomerase A	cytoplasm	i	AVDGEPLGRVSFELFADKVPKTAENFRAL	s		Bortez/Cont=	0.291667	0.208333	0.125	Cont/Cont=	0.916667	1.08333	0.208333	=Avg Bort/Cont (1h, 50nM)
HEK293T	bortezomib 1h, 50nM	4	2	3198.51	3198.6	Phosphatidylethanolamine-binding protein 1	cytoplasm	*m	PVDLSKWSGPLSLQEVDEQPQHPLHVTY	a		Bortez/Cont=	0.543478	0.434783	0.326087	Cont/Cont=	1.23913	0.76087	0.434783	=Avg Bort/Cont (1h, 50nM)
HEK293T	bortezomib 1h, 50nM	3	2	3198.57	3198.6	Phosphatidylethanolamine-binding protein 1	cytoplasm	*m	PVDLSKWSGPLSLQEVDEQPQHPLHVTY	a		Bortez/Cont=	0.747664	0.560748	0.373832	Cont/Cont=	1.1215	0.878505	0.560748	=Avg Bort/Cont (1h, 50nM)
HEK293T	bortezomib 1h, 50nM	5	2	3255.59	3255.63	Tumor protein, translationally-controlled 1	cytoplasm	*	MIIYRDLISHDEMFSDIYKIREIADGL	c		Bortez/Cont=	1.78082	1.31507	1.23288	Cont/Cont=	0.958904	1.0411	1.44292	=Avg Bort/Cont (1h, 50nM)
HEK293T	bortezomib 1h, 50nM	4	4	3284.72	3284.73	Triosephosphate isomerase 1	cytoplasm	c	KELASQPDVDGFLVGGASLKPEFVDIINAKQ	*		Bortez/Cont=	0.461538	0.34965	0.27972	Cont/Cont=	0.951049	1.04895	0.363636	=Avg Bort/Cont (1h, 50nM)
HEK293T	bortezomib 1h, 50nM	5	4	3900.03	3900.06	Phosphatidylethanolamine-binding protein 1	cytoplasm	y	AGAAVDELGKVLTPTQVKNRPTSISWDGLDSGKLYTL	v		Bortez/Cont=	0.796748	0.617886	0.520325	Cont/Cont=	1.13821	0.861789	0.644986	=Avg Bort/Cont (1h, 50nM)
HEK293T	bortezomib 1h, 50nM	9	8	4933.63	4933.52	Thymosin beta-10	cytoplasm	*m	Ac-ADKPDMGEIASFDKAKLKKTETQEKNTLPTKETIEQEKRSEIS	*	Monoisotopic mass	Bortez/Cont=	1.02752	0.990826	1.02752	Cont/Cont=	0.93578	1.06422	1.01529	=Avg Bort/Cont (1h, 50nM)
HEK293T	bortezomib 1h, 50nM	8	8	4933.66	4933.52	Thymosin beta-10	cytoplasm	*m	Ac-ADKPDMGEIASFDKAKLKKTETQEKNTLPTKETIEQEKRSEIS	*	Monoisotopic mass	Bortez/Cont=	0.94964	0.978417	1.00719	Cont/Cont=	0.892086	1.10791	0.978417	=Avg Bort/Cont (1h, 50nM)
HEK293T	bortezomib 1h, 50nM	6	8	4933.7	4933.52	Thymosin beta-10	cytoplasm	*m	Ac-ADKPDMGEIASFDKAKLKKTETQEKNTLPTKETIEQEKRSEIS	*	Monoisotopic mass	Bortez/Cont=	1.0073	1.0073	1.0073	Cont/Cont=	0.905109	1.09489	1.0073	=Avg Bort/Cont (1h, 50nM)
HEK293T	bortezomib 1h, 50nM	7	8	4933.71	4933.52	Thymosin beta-10	cytoplasm	*m	Ac-ADKPDMGEIASFDKAKLKKTETQEKNTLPTKETIEQEKRSEIS	*	Monoisotopic mass	Bortez/Cont=	0.955882	0.985294	0.955882	Cont/Cont=	0.882353	1.11765	0.965686	=Avg Bort/Cont (1h, 50nM)
HEK293T	bortezomib 1h, 50nM	5	8	4933.73	4933.52	Thymosin beta-10	cytoplasm	*m	Ac-ADKPDMGEIASFDKAKLKKTETQEKNTLPTKETIEQEKRSEIS	*	Monoisotopic mass	Bortez/Cont=	0.9375	1.01562	1.01562	Cont/Cont=	0.828125	1.17188	0.989583	=Avg Bort/Cont (1h, 50nM)
HEK293T	bortezomib 1h, 50nM	4	8	4933.76	4933.52	Thymosin beta-10	cytoplasm	*m	Ac-ADKPDMGEIASFDKAKLKKTETQEKNTLPTKETIEQEKRSEIS	*	Monoisotopic mass	Bortez/Cont=	0.976	0.992	0.928	Cont/Cont=	0.816	1.184	0.965333	=Avg Bort/Cont (1h, 50nM)
HEK293T	bortezomib 1h, 50nM	5	9	4960.64	4960.49	Thymosin beta-4	cytoplasm	*m	Ac-SDKPDMAEIEKFDKSKLKKTETQEKNPLPSKETIEQEKQAGES	*	Monoisotopic mass	Bortez/Cont=	1.12	1.04	0.8	Cont/Cont=	0.88	1.12	0.986667	=Avg Bort/Cont (1h, 50nM)
HEK293T	bortezomib 1h, 50nM	8	9	4960.67	4960.49	Thymosin beta-4	cytoplasm	*m	Ac-SDKPDMAEIEKFDKSKLKKTETQEKNPLPSKETIEQEKQAGES	*	Monoisotopic mass	Bortez/Cont=	1.12245	0.938776	0.877551	Cont/Cont=	0.877551	1.12245	0.979592	=Avg Bort/Cont (1h, 50nM)
HEK293T	bortezomib 1h, 50nM	7	9	4960.68	4960.49	Thymosin beta-4	cytoplasm	*m	Ac-SDKPDMAEIEKFDKSKLKKTETQEKNPLPSKETIEQEKQAGES	*	Monoisotopic mass	Bortez/Cont=	1.10236	1.03937	0.897638	Cont/Cont=	0.897638	1.10236	1.01312	=Avg Bort/Cont (1h, 50nM)
HEK293T	bortezomib 1h, 50nM	6	9	4960.73	4960.49	Thymosin beta-4	cytoplasm	*m	Ac-SDKPDMAEIEKFDKSKLKKTETQEKNPLPSKETIEQEKQAGES	*	Monoisotopic mass	Bortez/Cont=	1.02899	0.942029	0.797101	Cont/Cont=	0.913043	1.08696	0.922705	=Avg Bort/Cont (1h, 50nM)
HEK293T	bortezomib 1h, 50nM	9	9	4960.78	4960.49	Thymosin beta-4	cytoplasm	*m	Ac-SDKPDMAEIEKFDKSKLKKTETQEKNPLPSKETIEQEKQAGES	*	Monoisotopic mass	Bortez/Cont=	1.09774	0.947368	0.87218	Cont/Cont=	0.977444	1.02256	0.972431	=Avg Bort/Cont (1h, 50nM)
HEK293T	bortezomib 1h, 50nM	1	1	404.22								Bortez/Cont=	1.03665	1.01571	0.732984	Cont/Cont=	1.09948	0.900524	0.928447	=Avg Bort/Cont (1h, 50nM)
HEK293T	bortezomib 1h, 50nM	2	1	509.27								Bortez/Cont=	>5	>5	>5	Cont/Cont=	nd	nd	>5	=Avg Bort/Cont (1h, 50nM)
HEK293T	bortezomib 1h, 50nM	2	1	595.341								Bortez/Cont=	>5	>5	>5	Cont/Cont=	nd	nd	>5	=Avg Bort/Cont (1h, 50nM)
HEK293T	bortezomib 1h, 50nM	2	1	602.336								Bortez/Cont=	<0.2	<0.2	<0.2	Cont/Cont=	1.04545	0.954545	<0.2	=Avg Bort/Cont (1h, 50nM)
HEK293T	bortezomib 1h, 50nM	2	2	618.479								Bortez/Cont=	>5	>5	>5	Cont/Cont=	nd	nd	>5	=Avg Bort/Cont (1h, 50nM)
HEK293T	bortezomib 1h, 50nM	2	1	622.375								Bortez/Cont=	<0.2	<0.2	<0.2	Cont/Cont=	1.19577	0.804233	<0.2	=Avg Bort/Cont (1h, 50nM)
HEK293T	bortezomib 1h, 50nM	2	2	626.352								Bortez/Cont=	<0.2	<0.2	<0.2	Cont/Cont=	1.30952	0.690476	<0.2	=Avg Bort/Cont (1h, 50nM)
HEK293T	bortezomib 1h, 50nM	2	1	641.445								Bortez/Cont=	>5	>5	>5	Cont/Cont=	nd	nd	>5	=Avg Bort/Cont (1h, 50nM)
HEK293T	bortezomib 1h, 50nM	1	1	683.373								Bortez/Cont=	>5	>5	>5	Cont/Cont=	nd	nd	>5	=Avg Bort/Cont (1h, 50nM)
HEK293T	bortezomib 1h, 50nM	2	2	683.406								Bortez/Cont=	>5	>5	>5	Cont/Cont=	nd	nd	>5	=Avg Bort/Cont (1h, 50nM)
HEK293T	bortezomib 1h, 50nM	2	1	686.457								Bortez/Cont=	>5	>5	>5	Cont/Cont=	nd	nd	>5	=Avg Bort/Cont (1h, 50nM)
HEK293T	bortezomib 1h, 50nM	2	1	695.403								Bortez/Cont=	>5	>5	>5	Cont/Cont=	nd	nd	>5	=Avg Bort/Cont (1h, 50nM)
HEK293T	bortezomib 1h, 50nM	1	1	709.417								Bortez/Cont=	>5	>5	>5	Cont/Cont=	nd	nd	>5	=Avg Bort/Cont (1h, 50nM)
HEK293T	bortezomib 1h, 50nM	2	1	741.408								Bortez/Cont=	1.50943	1.66038	1.69811	Cont/Cont=	0.943396	1.0566	1.62264	=Avg Bort/Cont (1h, 50nM)
HEK293T	bortezomib 1h, 50nM	2	1	751.405								Bortez/Cont=	>5	>5	>5	Cont/Cont=	nd	nd	>5	=Avg Bort/Cont (1h, 50nM)
HEK293T	bortezomib 1h, 50nM	2	1	767.466								Bortez/Cont=	<0.2	<0.2	<0.2	Cont/Cont=	1.01887	0.981132	<0.2	=Avg Bort/Cont (1h, 50nM)
HEK293T	bortezomib 1h, 50nM	1	1	784.368								Bortez/Cont=	<0.2	<0.2	<0.2	Cont/Cont=	1.03704	0.962963	<0.2	=Avg Bort/Cont (1h, 50nM)
HEK293T	bortezomib 1h, 50nM	1	1	785.395								Bortez/Cont=	>5	>5	>5	Cont/Cont=	nd	nd	>5	=Avg Bort/Cont (1h, 50nM)
HEK293T	bortezomib 1h, 50nM	2	3	861.617								Bortez/Cont=	<0.2	<0.2	<0.2	Cont/Cont=	1.31737	0.682635	<0.2	=Avg Bort/Cont (1h, 50nM)
HEK293T	bortezomib 1h, 50nM	3	2	866.59								Bortez/Cont=	>5	>5	>5	Cont/Cont=	nd	nd	>5	=Avg Bort/Cont (1h, 50nM)
HEK293T	bortezomib 1h, 50nM	3	3	869.638								Bortez/Cont=	>5	>5	>5	Cont/Cont=	nd	nd	>5	=Avg Bort/Cont (1h, 50nM)
HEK293T	bortezomib 1h, 50nM	3	3	870.624								Bortez/Cont=	>5	>5	>5	Cont/Cont=	nd	nd	>5	=Avg Bort/Cont (1h, 50nM)
HEK293T	bortezomib 1h, 50nM	2	1	920.529								Bortez/Cont=	2.10345	1.75862	1.2069	Cont/Cont=	0.741379	1.25862	1.68966	=Avg Bort/Cont (1h, 50nM)
HEK293T	bortezomib 1h, 50nM	2	1	925.481								Bortez/Cont=	>5	>5	>5	Cont/Cont=	nd	nd	>5	=Avg Bort/Cont (1h, 50nM)
HEK293T	bortezomib 1h, 50nM	3	1	934.531								Bortez/Cont=	>5	>5	>5	Cont/Cont=	nd	nd	>5	=Avg Bort/Cont (1h, 50nM)
HEK293T	bortezomib 1h, 50nM	3	2	937.57								Bortez/Cont=	>5	>5	>5	Cont/Cont=	nd	nd	>5	=Avg Bort/Cont (1h, 50nM)
HEK293T	bortezomib 1h, 50nM	3	2	938.601								Bortez/Cont=	>5	>5	>5	Cont/Cont=	nd	nd	>5	=Avg Bort/Cont (1h, 50nM)
HEK293T	bortezomib 1h, 50nM	3	2	938.616								Bortez/Cont=	>5	>5	>5	Cont/Cont=	nd	nd	>5	=Avg Bort/Cont (1h, 50nM)
HEK293T	bortezomib 1h, 50nM	3	2	943.627								Bortez/Cont=	<0.2	<0.2	<0.2	Cont/Cont=	1.18049	0.819512	<0.2	=Avg Bort/Cont (1h, 50nM)
HEK293T	bortezomib 1h, 50nM	2	2	966.503								Bortez/Cont=	0.568807	0.642202	0.293578	Cont/Cont=	1.26606	0.733945	0.501529	=Avg Bort/Cont (1h, 50nM)
HEK293T	bortezomib 1h, 50nM	2	1	984.927								Bortez/Cont=	>5	>5	>5	Cont/Cont=	nd	nd	>5	=Avg Bort/Cont (1h, 50nM)
HEK293T	bortezomib 1h, 50nM	2	1	996.531								Bortez/Cont=	2.41905	1.73333	1.1619	Cont/Cont=	0.933333	1.06667	1.77143	=Avg Bort/Cont (1h, 50nM)
HEK293T	bortezomib 1h, 50nM	2	1	1005.57								Bortez/Cont=	>5	>5	>5	Cont/Cont=	nd	nd	>5	=Avg Bort/Cont (1h, 50nM)
HEK293T	bortezomib 1h, 50nM	3	1	1005.58								Bortez/Cont=	>5	>5	>5	Cont/Cont=	nd	nd	>5	=Avg Bort/Cont (1h, 50nM)
HEK293T	bortezomib 1h, 50nM	3	1	1006.6								Bortez/Cont=	>5	>5	>5	Cont/Cont=	nd	nd	>5	=Avg Bort/Cont (1h, 50nM)
HEK293T	bortezomib 1h, 50nM	3	1	1011.58								Bortez/Cont=	>5	>5	>5	Cont/Cont=	nd	nd	>5	=Avg Bort/Cont (1h, 50nM)
HEK293T	bortezomib 1h, 50nM	2	2	1024.61								Bortez/Cont=	>5	>5	>5	Cont/Cont=	nd	nd	>5	=Avg Bort/Cont (1h, 50nM)
HEK293T	bortezomib 1h, 50nM	3	1	1044.64								Bortez/Cont=	<0.2	<0.2	<0.2	Cont/Cont=	1.01754	0.982456	<0.2	=Avg Bort/Cont (1h, 50nM)
HEK293T	bortezomib 1h, 50nM	2	1	1067.64								Bortez/Cont=	4.24242	1.81818	2.06061	Cont/Cont=	0.909091	1.09091	2.70707	=Avg Bort/Cont (1h, 50nM)
HEK293T	bortezomib 1h, 50nM	3	2	1075.6								Bortez/Cont=	>5	>5	>5	Cont/Cont=	nd	nd	>5	=Avg Bort/Cont (1h, 50nM)
HEK293T	bortezomib 1h, 50nM	3	2	1077.7								Bortez/Cont=	>5	>5	>5	Cont/Cont=	nd	nd	>5	=Avg Bort/Cont (1h, 50nM)
HEK293T	bortezomib 1h, 50nM	2	1	1079.6								Bortez/Cont=	2.95455	2.40909	1.90909	Cont/Cont=	1	1	2.42424	=Avg Bort/Cont (1h, 50nM)
HEK293T	bortezomib 1h, 50nM	2	1	1085.59								Bortez/Cont=	>5	>5	>5	Cont/Cont=	nd	nd	>5	=Avg Bort/Cont (1h, 50nM)
HEK293T	bortezomib 1h, 50nM	1	1	1093.53								Bortez/Cont=	>5	>5	>5	Cont/Cont=	nd	nd	>5	=Avg Bort/Cont (1h, 50nM)
HEK293T	bortezomib 1h, 50nM	2	1	1104.6								Bortez/Cont=	3.93333	4	3.33333	Cont/Cont=	1	1	3.75556	=Avg Bort/Cont (1h, 50nM)
HEK293T	bortezomib 1h, 50nM	3	3	1118.75								Bortez/Cont=	3.02222	1.93333	1.24444	Cont/Cont=	0.977778	1.02222	2.06667	=Avg Bort/Cont (1h, 50nM)
HEK293T	bortezomib 1h, 50nM	3	1	1126.68								Bortez/Cont=	>5	>5	>5	Cont/Cont=	nd	nd	>5	=Avg Bort/Cont (1h, 50nM)
HEK293T	bortezomib 1h, 50nM	2	1	1140.58								Bortez/Cont=	2.27692	1.66154	1.63077	Cont/Cont=	1.01538	0.984615	1.85641	=Avg Bort/Cont (1h, 50nM)
HEK293T	bortezomib 1h, 50nM	3	1	1143.61								Bortez/Cont=	>5	>5	>5	Cont/Cont=	nd	nd	>5	=Avg Bort/Cont (1h, 50nM)
HEK293T	bortezomib 1h, 50nM	3	2	1145.64								Bortez/Cont=	1.61006	0.100629	0.704403	Cont/Cont=	1.1195	0.880503	0.805031	=Avg Bort/Cont (1h, 50nM)
HEK293T	bortezomib 1h, 50nM	3	1	1145.68								Bortez/Cont=	>5	>5	>5	Cont/Cont=	nd	nd	>5	=Avg Bort/Cont (1h, 50nM)
HEK293T	bortezomib 1h, 50nM	2	2	1148.64								Bortez/Cont=	0.956522	0.869565	0.869565	Cont/Cont=	0.782609	1.21739	0.898551	=Avg Bort/Cont (1h, 50nM)
HEK293T	bortezomib 1h, 50nM	2	1	1157.59								Bortez/Cont=	2.09524	1.75238	1.65714	Cont/Cont=	0.87619	1.12381	1.83492	=Avg Bort/Cont (1h, 50nM)
HEK293T	bortezomib 1h, 50nM	2	2	1160.64								Bortez/Cont=	1.37634	1.13978	0.967742	Cont/Cont=	1.07527	0.924731	1.16129	=Avg Bort/Cont (1h, 50nM)
HEK293T	bortezomib 1h, 50nM	2	1	1174.56								Bortez/Cont=	3.42857	3.14286	2.74286	Cont/Cont=	0.857143	1.14286	3.10476	=Avg Bort/Cont (1h, 50nM)
HEK293T	bortezomib 1h, 50nM	2	2	1184.67								Bortez/Cont=	>5	>5	po	Cont/Cont=	nd	nd	>5	=Avg Bort/Cont (1h, 50nM)
HEK293T	bortezomib 1h, 50nM	2	1	1186.63								Bortez/Cont=	>5	>5	>5	Cont/Cont=	nd	nd	>5	=Avg Bort/Cont (1h, 50nM)
HEK293T	bortezomib 1h, 50nM	3	2	1186.69								Bortez/Cont=	2.48148	1.88889	1.72222	Cont/Cont=	0.87037	1.12963	2.03086	=Avg Bort/Cont (1h, 50nM)
HEK293T	bortezomib 1h, 50nM	3	3	1188.74								Bortez/Cont=	>5	>5	>5	Cont/Cont=	nd	nd	>5	=Avg Bort/Cont (1h, 50nM)
HEK293T	bortezomib 1h, 50nM	2	1	1191.6								Bortez/Cont=	>5	>5	>5	Cont/Cont=	nd	nd	>5	=Avg Bort/Cont (1h, 50nM)
HEK293T	bortezomib 1h, 50nM	2	1	1203.66								Bortez/Cont=	1.5	1.25	1.25	Cont/Cont=	0.875	1.125	1.33333	=Avg Bort/Cont (1h, 50nM)
HEK293T	bortezomib 1h, 50nM	2	1	1209.65								Bortez/Cont=	>5	>5	>5	Cont/Cont=	nd	nd	>5	=Avg Bort/Cont (1h, 50nM)
HEK293T	bortezomib 1h, 50nM	2	1	1215.58								Bortez/Cont=	5.2	3.2	2	Cont/Cont=	0.88	1.12	3.46667	=Avg Bort/Cont (1h, 50nM)
HEK293T	bortezomib 1h, 50nM	2	1	1249.62								Bortez/Cont=	6.5	6	6	Cont/Cont=	1	1	>5	=Avg Bort/Cont (1h, 50nM)
HEK293T	bortezomib 1h, 50nM	1	1	1249.63								Bortez/Cont=	>5	>5	>5	Cont/Cont=	nd	nd	>5	=Avg Bort/Cont (1h, 50nM)
HEK293T	bortezomib 1h, 50nM	2	1	1269.73								Bortez/Cont=	>5	>5	>5	Cont/Cont=	nd	nd	>5	=Avg Bort/Cont (1h, 50nM)
HEK293T	bortezomib 1h, 50nM	3	2	1269.75								Bortez/Cont=	>5	>5	>5	Cont/Cont=	nd	nd	>5	=Avg Bort/Cont (1h, 50nM)
HEK293T	bortezomib 1h, 50nM	2	2	1270.67								Bortez/Cont=	>5	nd	>5	Cont/Cont=	nd	nd	>5	=Avg Bort/Cont (1h, 50nM)
HEK293T	bortezomib 1h, 50nM	2	1	1272.55								Bortez/Cont=	1.17647	0.588235	0.470588	Cont/Cont=	0.823529	1.17647	0.745098	=Avg Bort/Cont (1h, 50nM)
HEK293T	bortezomib 1h, 50nM	2	1	1287.67								Bortez/Cont=	>5	>5	>5	Cont/Cont=	nd	nd	>5	=Avg Bort/Cont (1h, 50nM)
HEK293T	bortezomib 1h, 50nM	2	1	1289.66								Bortez/Cont=	1.84615	1.53846	1.38462	Cont/Cont=	0.769231	1.23077	1.58974	=Avg Bort/Cont (1h, 50nM)
HEK293T	bortezomib 1h, 50nM	2	2	1292.73								Bortez/Cont=	>5	>5	>5	Cont/Cont=	nd	nd	>5	=Avg Bort/Cont (1h, 50nM)
HEK293T	bortezomib 1h, 50nM	2	1	1297.68								Bortez/Cont=	1.60494	0.888889	0.864198	Cont/Cont=	1.03704	0.962963	1.11934	=Avg Bort/Cont (1h, 50nM)
HEK293T	bortezomib 1h, 50nM	3	1	1317.66								Bortez/Cont=	>5	>5	>5	Cont/Cont=	nd	nd	>5	=Avg Bort/Cont (1h, 50nM)
HEK293T	bortezomib 1h, 50nM	3	3	1332.74								Bortez/Cont=	<0.2	<0.2	<0.2	Cont/Cont=	1.17582	0.824176	<0.2	=Avg Bort/Cont (1h, 50nM)
HEK293T	bortezomib 1h, 50nM	3	2	1337.77								Bortez/Cont=	>5	>5	>5	Cont/Cont=	nd	nd	>5	=Avg Bort/Cont (1h, 50nM)
HEK293T	bortezomib 1h, 50nM	2	1	1342.71								Bortez/Cont=	>5	>5	>5	Cont/Cont=	nd	nd	>5	=Avg Bort/Cont (1h, 50nM)
HEK293T	bortezomib 1h, 50nM	3	1	1343.74								Bortez/Cont=	>5	>5	>5	Cont/Cont=	nd	nd	>5	=Avg Bort/Cont (1h, 50nM)
HEK293T	bortezomib 1h, 50nM	2	2	1366.77								Bortez/Cont=	>5	>5	>5	Cont/Cont=	nd	nd	>5	=Avg Bort/Cont (1h, 50nM)
HEK293T	bortezomib 1h, 50nM	3	2	1380.79								Bortez/Cont=	>5	>5	>5	Cont/Cont=	nd	nd	>5	=Avg Bort/Cont (1h, 50nM)
HEK293T	bortezomib 1h, 50nM	2	2	1384.78								Bortez/Cont=	>5	>5	>5	Cont/Cont=	nd	nd	>5	=Avg Bort/Cont (1h, 50nM)
HEK293T	bortezomib 1h, 50nM	3	2	1384.79								Bortez/Cont=	>5	>5	>5	Cont/Cont=	nd	nd	>5	=Avg Bort/Cont (1h, 50nM)
HEK293T	bortezomib 1h, 50nM	2	1	1385.75								Bortez/Cont=	>5	>5	>5	Cont/Cont=	nd	nd	>5	=Avg Bort/Cont (1h, 50nM)
HEK293T	bortezomib 1h, 50nM	2	1	1393.68								Bortez/Cont=	7	5.5	5.3	Cont/Cont=	1	1	>5	=Avg Bort/Cont (1h, 50nM)
HEK293T	bortezomib 1h, 50nM	3	1	1398.66								Bortez/Cont=	>5	>5	>5	Cont/Cont=	nd	nd	>5	=Avg Bort/Cont (1h, 50nM)
HEK293T	bortezomib 1h, 50nM	3	2	1400.84								Bortez/Cont=	>5	>5	>5	Cont/Cont=	nd	nd	>5	=Avg Bort/Cont (1h, 50nM)
HEK293T	bortezomib 1h, 50nM	2	1	1406.73								Bortez/Cont=	3.66667	3.66667	4	Cont/Cont=	1	1	3.77778	=Avg Bort/Cont (1h, 50nM)
HEK293T	bortezomib 1h, 50nM	2	2	1406.78								Bortez/Cont=	2.8	1.84	1.4	Cont/Cont=	1	1	2.01333	=Avg Bort/Cont (1h, 50nM)
HEK293T	bortezomib 1h, 50nM	2	2	1407.77								Bortez/Cont=	1.11111	0.992593	0.948148	Cont/Cont=	0.962963	1.03704	1.01728	=Avg Bort/Cont (1h, 50nM)
HEK293T	bortezomib 1h, 50nM	2	1	1421.65								Bortez/Cont=	1.33333	0.761905	0.571429	Cont/Cont=	0.952381	1.04762	0.888889	=Avg Bort/Cont (1h, 50nM)
HEK293T	bortezomib 1h, 50nM	3	1	1436.78								Bortez/Cont=	>5	>5	>5	Cont/Cont=	nd	nd	>5	=Avg Bort/Cont (1h, 50nM)
HEK293T	bortezomib 1h, 50nM	2	1	1436.79								Bortez/Cont=	>5	>5	>5	Cont/Cont=	nd	nd	>5	=Avg Bort/Cont (1h, 50nM)
HEK293T	bortezomib 1h, 50nM	3	3	1445.86								Bortez/Cont=	<0.2	<0.2	<0.2	Cont/Cont=	1.20339	0.79661	<0.2	=Avg Bort/Cont (1h, 50nM)
HEK293T	bortezomib 1h, 50nM	3	3	1455.84								Bortez/Cont=	>5	>5	>5	Cont/Cont=	nd	nd	>5	=Avg Bort/Cont (1h, 50nM)
HEK293T	bortezomib 1h, 50nM	2	1	1459.69								Bortez/Cont=	3.46667	2.44444	2.22222	Cont/Cont=	0.888889	1.11111	2.71111	=Avg Bort/Cont (1h, 50nM)
HEK293T	bortezomib 1h, 50nM	3	1	1459.73								Bortez/Cont=	1.53571	1.5	1.54762	Cont/Cont=	0.928571	1.07143	1.52778	=Avg Bort/Cont (1h, 50nM)
HEK293T	bortezomib 1h, 50nM	3	2	1468.83								Bortez/Cont=	>5	>5	>5	Cont/Cont=	nd	nd	>5	=Avg Bort/Cont (1h, 50nM)
HEK293T	bortezomib 1h, 50nM	3	1	1474.75								Bortez/Cont=	2.51852	1.53704	1.11111	Cont/Cont=	1.07407	0.925926	1.72222	=Avg Bort/Cont (1h, 50nM)
HEK293T	bortezomib 1h, 50nM	3	2	1474.86								Bortez/Cont=	>5	>5	>5	Cont/Cont=	nd	nd	>5	=Avg Bort/Cont (1h, 50nM)
HEK293T	bortezomib 1h, 50nM	3	2	1476.76								Bortez/Cont=	1.58974	1.11538	0.833333	Cont/Cont=	1.02564	0.974359	1.17949	=Avg Bort/Cont (1h, 50nM)
HEK293T	bortezomib 1h, 50nM	3	2	1476.83								Bortez/Cont=	0.92	0.696	0.608	Cont/Cont=	0.92	1.08	0.741333	=Avg Bort/Cont (1h, 50nM)
HEK293T	bortezomib 1h, 50nM	3	1	1497.73								Bortez/Cont=	>5	>5	>5	Cont/Cont=	nd	nd	>5	=Avg Bort/Cont (1h, 50nM)
HEK293T	bortezomib 1h, 50nM	2	1	1502.7								Bortez/Cont=	1.89189	0.918919	0.756757	Cont/Cont=	0.918919	1.08108	1.18919	=Avg Bort/Cont (1h, 50nM)
HEK293T	bortezomib 1h, 50nM	3	2	1513.75								Bortez/Cont=	>5	>5	>5	Cont/Cont=	nd	nd	>5	=Avg Bort/Cont (1h, 50nM)
HEK293T	bortezomib 1h, 50nM	2	3	1513.94								Bortez/Cont=	>5	>5	>5	Cont/Cont=	nd	nd	>5	=Avg Bort/Cont (1h, 50nM)
HEK293T	bortezomib 1h, 50nM	3	3	1513.94								Bortez/Cont=	>5	>5	>5	Cont/Cont=	nd	nd	>5	=Avg Bort/Cont (1h, 50nM)
HEK293T	bortezomib 1h, 50nM	2	1	1516.81								Bortez/Cont=	3.42222	2.22222	2	Cont/Cont=	0.888889	1.11111	2.54815	=Avg Bort/Cont (1h, 50nM)
HEK293T	bortezomib 1h, 50nM	2	1	1531.81								Bortez/Cont=	1.43158	0.842105	0.842105	Cont/Cont=	0.947368	1.05263	1.0386	=Avg Bort/Cont (1h, 50nM)
HEK293T	bortezomib 1h, 50nM	4	1	1533.85								Bortez/Cont=	<0.2	<0.2	<0.2	Cont/Cont=	1.14286	0.857143	<0.2	=Avg Bort/Cont (1h, 50nM)
HEK293T	bortezomib 1h, 50nM	3	2	1537.79								Bortez/Cont=	3.63636	3.93939	3.81818	Cont/Cont=	0.909091	1.09091	3.79798	=Avg Bort/Cont (1h, 50nM)
HEK293T	bortezomib 1h, 50nM	2	1	1543.78								Bortez/Cont=	3.02222	1.77778	1.11111	Cont/Cont=	1.11111	0.888889	1.97037	=Avg Bort/Cont (1h, 50nM)
HEK293T	bortezomib 1h, 50nM	3	2	1553.85								Bortez/Cont=	>5	>5	>5	Cont/Cont=	nd	nd	>5	=Avg Bort/Cont (1h, 50nM)
HEK293T	bortezomib 1h, 50nM	2	2	1554.86								Bortez/Cont=	2.47458	2.0678	2.0339	Cont/Cont=	0.847458	1.15254	2.19209	=Avg Bort/Cont (1h, 50nM)
HEK293T	bortezomib 1h, 50nM	3	1	1556.85								Bortez/Cont=	>5	>5	>5	Cont/Cont=	nd	nd	>5	=Avg Bort/Cont (1h, 50nM)
HEK293T	bortezomib 1h, 50nM	3	3	1557.81								Bortez/Cont=	1.14085	1.04225	0.71831	Cont/Cont=	0.943662	1.05634	0.967136	=Avg Bort/Cont (1h, 50nM)
HEK293T	bortezomib 1h, 50nM	3	2	1558.86								Bortez/Cont=	1.17241	1.35172	1.46207	Cont/Cont=	0.786207	1.21379	1.32874	=Avg Bort/Cont (1h, 50nM)
HEK293T	bortezomib 1h, 50nM	2	2	1558.87								Bortez/Cont=	1.12727	1.18182	1.23636	Cont/Cont=	0.818182	1.18182	1.18182	=Avg Bort/Cont (1h, 50nM)
HEK293T	bortezomib 1h, 50nM	3	3	1573.92								Bortez/Cont=	>5	>5	>5	Cont/Cont=	nd	nd	>5	=Avg Bort/Cont (1h, 50nM)
HEK293T	bortezomib 1h, 50nM	3	2	1584.82								Bortez/Cont=	>5	>5	>5	Cont/Cont=	nd	nd	>5	=Avg Bort/Cont (1h, 50nM)
HEK293T	bortezomib 1h, 50nM	2	2	1584.85								Bortez/Cont=	9.5	8.125	7.5	Cont/Cont=	0.625	1.375	>5	=Avg Bort/Cont (1h, 50nM)
HEK293T	bortezomib 1h, 50nM	2	3	1584.96								Bortez/Cont=	>5	>5	>5	Cont/Cont=	nd	nd	>5	=Avg Bort/Cont (1h, 50nM)
HEK293T	bortezomib 1h, 50nM	2	1	1591.74								Bortez/Cont=	1	0.714286	0.714286	Cont/Cont=	1.28571	0.714286	0.809524	=Avg Bort/Cont (1h, 50nM)
HEK293T	bortezomib 1h, 50nM	2	2	1591.87								Bortez/Cont=	1	1	0.953846	Cont/Cont=	0.876923	1.12308	0.984615	=Avg Bort/Cont (1h, 50nM)
HEK293T	bortezomib 1h, 50nM	2	1	1607.74								Bortez/Cont=	>5	>5	>5	Cont/Cont=	nd	nd	>5	=Avg Bort/Cont (1h, 50nM)
HEK293T	bortezomib 1h, 50nM	2	2	1609.81								Bortez/Cont=	<0.2	<0.2	<0.2	Cont/Cont=	1.15385	0.846154	<0.2	=Avg Bort/Cont (1h, 50nM)
HEK293T	bortezomib 1h, 50nM	2	1	1615.8								Bortez/Cont=	>5	>5	>5	Cont/Cont=	nd	nd	>5	=Avg Bort/Cont (1h, 50nM)
HEK293T	bortezomib 1h, 50nM	2	1	1622.87								Bortez/Cont=	1.39535	1.04651	1.09302	Cont/Cont=	0.837209	1.16279	1.17829	=Avg Bort/Cont (1h, 50nM)
HEK293T	bortezomib 1h, 50nM	4	2	1630.97								Bortez/Cont=	>5	>5	>5	Cont/Cont=	nd	nd	>5	=Avg Bort/Cont (1h, 50nM)
HEK293T	bortezomib 1h, 50nM	2	1	1640.84								Bortez/Cont=	>5	>5	>5	Cont/Cont=	nd	nd	>5	=Avg Bort/Cont (1h, 50nM)
HEK293T	bortezomib 1h, 50nM	4	3	1643.92								Bortez/Cont=	<0.2	<0.2	<0.2	Cont/Cont=	0.989583	1.01042	<0.2	=Avg Bort/Cont (1h, 50nM)
HEK293T	bortezomib 1h, 50nM	3	3	1653.97								Bortez/Cont=	>5	>5	>5	Cont/Cont=	nd	nd	>5	=Avg Bort/Cont (1h, 50nM)
HEK293T	bortezomib 1h, 50nM	3	2	1655.89								Bortez/Cont=	>5	>5	>5	Cont/Cont=	nd	nd	>5	=Avg Bort/Cont (1h, 50nM)
[truncated: 2,252 more rows]
